# Supplementary material for: Phospho-islands and the evolution of phosphorylated amino acids in mammals
Source: bioRxiv preprint, doi:10.1101/2020.09.01.278192, version 1 (2020-09-01)
Supplement: supplementary tables [file 278192_file03.xlsx]

## Sheet: hmr_sites_list
id1	id2	pos	aacid	iPTMnet_score	motif_type	ordered/disoredred	in_island/individual
TACC1_HUMAN	O75410	10	S	2	P	o	NA
TACC1_HUMAN	O75410	4	S	2	P	d	ind
TACC1_HUMAN	O75410	287	S	1	P	d	ind
TACC1_HUMAN	O75410	591	S	2	P	d	ind
TACC1_HUMAN	O75410	504	T	1	A	d	ind
TM10A_HUMAN	Q8TBZ6	307	S	1	A	d	isl
TM10A_HUMAN	Q8TBZ6	84	S	1	A	d	ind
TM10A_HUMAN	Q8TBZ6	318	S	2	P	d	isl
TM10A_HUMAN	Q8TBZ6	304	S	1	A	d	isl
TCPG_HUMAN	P49368	385	S	1	A	o	NA
TCPG_HUMAN	P49368	170	S	1	B	o	NA
TCPG_HUMAN	P49368	380	S	1	B	o	NA
TCPG_HUMAN	P49368	232	Y	1	Y	o	NA
TCPG_HUMAN	P49368	252	S	2	B	d	ind
SKIL_HUMAN	P12757	452	S	2	B	d	ind
RRN3_HUMAN	Q9NYV6	170	S	4	A	d	isl
RRN3_HUMAN	Q9NYV6	44	S	4	P	d	ind
RRN3_HUMAN	Q9NYV6	172	S	4	A	d	isl
DCP1B_HUMAN	Q8IZD4	67	S	1	P	o	NA
DCP1B_HUMAN	Q8IZD4	283	S	1	P	d	ind
DCP1B_HUMAN	Q8IZD4	147	S	2	P	o	NA
CC136_HUMAN	Q96JN2	52	S	2	B	d	ind
F177A_HUMAN	Q8N128	65	T	2	A	d	isl
F177A_HUMAN	Q8N128	69	Y	2	Y	d	isl
F177A_HUMAN	Q8N128	70	S	2	A	d	isl
F177A_HUMAN	Q8N128	71	T	2	A	d	isl
ZKSC4_HUMAN	Q969J2	371	T	1	B	o	NA
ZKSC4_HUMAN	Q969J2	44	S	1	P	d	ind
ZKSC4_HUMAN	Q969J2	510	T	1	B	d	ind
XRN1_HUMAN	Q8IZH2	1299	S	1	P	d	ind
XRN1_HUMAN	Q8IZH2	1348	S	1	P	d	ind
XRN1_HUMAN	Q8IZH2	1645	S	2	P	d	ind
SC5A3_HUMAN	P53794	673	S	1	A	d	ind
SC5A3_HUMAN	P53794	594	S	2	O	d	isl
SC5A3_HUMAN	P53794	320	S	1	O	o	NA
SC5A3_HUMAN	P53794	591	S	1	A	d	isl
SC5A3_HUMAN	P53794	632	S	2	O	o	NA
TTC14_HUMAN	Q96N46	629	S	1	B	d	ind
TTC14_HUMAN	Q96N46	671	S	2	P	d	ind
RGS18_HUMAN	Q9NS28	49	S	4	B	d	ind
RGS18_HUMAN	Q9NS28	218	S	3	B	o	NA
RGS18_HUMAN	Q9NS28	216	S	4	B	d	ind
MK04_HUMAN	P31152	386	S	1	B	d	ind
MK04_HUMAN	P31152	186	S	4	A	o	NA
MK04_HUMAN	P31152	434	S	2	P	o	NA
ZDH17_HUMAN	Q8IUH5	70	Y	2	Y	o	NA
ZDH17_HUMAN	Q8IUH5	286	Y	1	Y	d	ind
MMP14_HUMAN	P50281	577	S	3	A	o	NA
RBGP1_HUMAN	Q9Y3P9	134	S	1	P	d	isl
RBGP1_HUMAN	Q9Y3P9	35	T	2	P	d	ind
RBGP1_HUMAN	Q9Y3P9	996	T	2	A	d	ind
RBGP1_HUMAN	Q9Y3P9	6	S	1	O	d	ind
RBGP1_HUMAN	Q9Y3P9	360	S	1	A	d	ind
RBGP1_HUMAN	Q9Y3P9	137	T	1	P	d	isl
RBGP1_HUMAN	Q9Y3P9	42	S	2	A	d	ind
RBGP1_HUMAN	Q9Y3P9	491	S	2	P	d	isl
RBGP1_HUMAN	Q9Y3P9	13	S	1	A	d	ind
RBGP1_HUMAN	Q9Y3P9	499	S	1	O	d	isl
RBGP1_HUMAN	Q9Y3P9	56	S	1	A	d	ind
RBGP1_HUMAN	Q9Y3P9	604	S	1	O	d	ind
RBGP1_HUMAN	Q9Y3P9	1053	T	1	B	o	NA
RBGP1_HUMAN	Q9Y3P9	1055	S	1	B	o	NA
RBGP1_HUMAN	Q9Y3P9	508	S	2	P	d	isl
JADE3_HUMAN	Q92613	774	S	2	A	d	isl
JADE3_HUMAN	Q92613	566	S	2	P	d	ind
JADE3_HUMAN	Q92613	776	S	2	A	d	isl
CI072_HUMAN	Q96LT7	9	S	1	P	d	ind
CP19A_HUMAN	P11511	392	T	1	B	o	NA
TIE2_HUMAN	Q02763	1113	Y	4	Y	o	NA
TIE2_HUMAN	Q02763	1108	Y	4	Y	o	NA
TIE2_HUMAN	Q02763	1102	Y	4	Y	o	NA
TIE2_HUMAN	Q02763	1119	S	3	A	d	ind
1433B_HUMAN	P31946	130	Y	1	Y	o	NA
1433B_HUMAN	P31946	132	S	4	B	o	NA
1433B_HUMAN	P31946	6	S	1	A	d	isl
1433B_HUMAN	P31946	66	S	1	A	d	isl
1433B_HUMAN	P31946	2	T	2	A	d	isl
1433B_HUMAN	P31946	136	S	1	A	o	NA
1433B_HUMAN	P31946	47	S	1	O	o	NA
1433B_HUMAN	P31946	50	Y	1	Y	o	NA
1433B_HUMAN	P31946	116	S	1	O	o	NA
1433B_HUMAN	P31946	21	Y	1	Y	d	isl
1433B_HUMAN	P31946	186	S	3	P	o	NA
1433B_HUMAN	P31946	60	S	4	B	d	isl
VEGFC_HUMAN	P49767	101	S	2	A	d	ind
AL1A2_HUMAN	O94788	284	T	1	B	o	NA
AL1A2_HUMAN	O94788	351	S	2	P	d	ind
RS5_HUMAN	P46782	52	S	2	O	o	NA
RS5_HUMAN	P46782	142	S	2	P	o	NA
NDUA4_HUMAN	O00483	65	Y	1	Y	o	NA
NDUA4_HUMAN	O00483	66	S	2	B	o	NA
NDUA4_HUMAN	O00483	71	Y	1	Y	d	ind
ZFP28_HUMAN	Q8NHY6	696	T	1	B	d	ind
PHTF2_HUMAN	Q8N3S3	331	S	1	A	d	isl
PHTF2_HUMAN	Q8N3S3	279	S	1	A	d	ind
PHTF2_HUMAN	Q8N3S3	335	S	1	A	d	isl
PHTF2_HUMAN	Q8N3S3	336	S	1	A	d	isl
MEX3D_HUMAN	Q86XN8	506	S	1	B	d	isl
MEX3D_HUMAN	Q86XN8	176	S	1	B	d	ind
MEX3D_HUMAN	Q86XN8	510	T	2	P	d	isl
MEX3D_HUMAN	Q86XN8	514	S	2	P	d	isl
ACBD5_HUMAN	Q5T8D3	193	S	2	B	d	isl
ACBD5_HUMAN	Q5T8D3	194	S	2	A	d	isl
ACBD5_HUMAN	Q5T8D3	196	S	2	A	d	isl
ACBD5_HUMAN	Q5T8D3	200	S	2	A	d	isl
ACBD5_HUMAN	Q5T8D3	428	S	2	A	d	isl
ACBD5_HUMAN	Q5T8D3	400	T	2	A	d	isl
ACBD5_HUMAN	Q5T8D3	418	S	1	A	d	isl
ACBD5_HUMAN	Q5T8D3	404	S	1	O	d	isl
ACBD5_HUMAN	Q5T8D3	181	T	1	P	d	ind
ACBD5_HUMAN	Q5T8D3	441	S	1	O	d	isl
ACBD5_HUMAN	Q5T8D3	156	S	1	A	d	isl
ACBD5_HUMAN	Q5T8D3	157	S	1	A	d	isl
ACBD5_HUMAN	Q5T8D3	444	S	1	A	d	isl
ACBD5_HUMAN	Q5T8D3	127	T	1	B	d	ind
ACBD5_HUMAN	Q5T8D3	160	T	1	O	d	isl
INAR2_HUMAN	P48551	322	S	1	A	d	isl
INAR2_HUMAN	P48551	324	S	1	A	d	isl
INAR2_HUMAN	P48551	400	S	2	P	d	ind
PIPNA_HUMAN	Q00169	58	T	1	O	o	NA
PIPNA_HUMAN	Q00169	140	Y	1	Y	o	NA
PIPNA_HUMAN	Q00169	165	S	3	B	d	ind
TMC2_HUMAN	Q8TDI7	597	T	1	O	o	NA
MEX3A_HUMAN	A1L020	338	S	2	B	o	NA
MEX3A_HUMAN	A1L020	308	S	1	P	o	NA
MEX3A_HUMAN	A1L020	428	S	2	P	d	ind
AIRE_HUMAN	O43918	68	T	3	A	o	NA
AIRE_HUMAN	O43918	156	S	3	O	d	ind
MLF2_HUMAN	Q15773	38	S	1	P	d	ind
MLF2_HUMAN	Q15773	167	S	1	O	d	ind
MLF2_HUMAN	Q15773	238	S	2	P	d	isl
MLF2_HUMAN	Q15773	144	S	2	A	d	isl
MLF2_HUMAN	Q15773	146	S	1	A	d	isl
MLF2_HUMAN	Q15773	243	S	1	O	d	isl
MLF2_HUMAN	Q15773	152	S	2	O	d	isl
MLF2_HUMAN	Q15773	217	S	2	B	d	ind
MLF2_HUMAN	Q15773	240	S	2	O	d	isl
SDE2_HUMAN	Q6IQ49	266	S	1	O	d	ind
SDE2_HUMAN	Q6IQ49	278	S	2	P	d	ind
CC14A_HUMAN	Q9UNH5	84	Y	1	Y	o	NA
CC14A_HUMAN	Q9UNH5	583	S	2	B	d	ind
PP1RA_HUMAN	Q96QC0	451	S	1	B	d	ind
PP1RA_HUMAN	Q96QC0	398	S	2	B	d	ind
PP1RA_HUMAN	Q96QC0	591	S	2	P	d	isl
PP1RA_HUMAN	Q96QC0	382	S	2	P	d	ind
PP1RA_HUMAN	Q96QC0	594	S	1	O	d	isl
PP1RA_HUMAN	Q96QC0	503	S	1	P	d	ind
PP1RA_HUMAN	Q96QC0	313	S	2	P	d	isl
PP1RA_HUMAN	Q96QC0	315	T	1	B	d	isl
PP1RA_HUMAN	Q96QC0	542	S	2	O	d	ind
PP1RA_HUMAN	Q96QC0	320	S	1	P	d	isl
K2C1B_HUMAN	Q7Z794	177	S	1	B	o	NA
K2C1B_HUMAN	Q7Z794	60	S	1	B	d	ind
K2C1B_HUMAN	Q7Z794	328	S	1	A	d	ind
ZFY_HUMAN	P08048	567	T	1	B	d	ind
H2A2C_HUMAN	Q16777	102	T	1	B	o	NA
VPS35_HUMAN	Q96QK1	759	S	1	A	d	ind
VPS35_HUMAN	Q96QK1	7	S	2	P	d	ind
VPS35_HUMAN	Q96QK1	783	S	2	P	d	ind
VPS35_HUMAN	Q96QK1	791	Y	1	Y	d	ind
VPS35_HUMAN	Q96QK1	59	S	1	P	o	NA
VPS35_HUMAN	Q96QK1	507	Y	1	Y	o	NA
AF1L1_HUMAN	Q8TED9	353	S	1	O	d	isl
AF1L1_HUMAN	Q8TED9	98	S	1	P	d	isl
AF1L1_HUMAN	Q8TED9	104	S	1	P	d	isl
AF1L1_HUMAN	Q8TED9	329	S	1	P	d	ind
AF1L1_HUMAN	Q8TED9	747	S	1	B	d	isl
AF1L1_HUMAN	Q8TED9	557	Y	1	Y	d	ind
AF1L1_HUMAN	Q8TED9	751	S	1	O	d	isl
AF1L1_HUMAN	Q8TED9	745	S	1	P	d	isl
AF1L1_HUMAN	Q8TED9	603	S	1	B	d	ind
AF1L1_HUMAN	Q8TED9	349	S	1	B	d	isl
AF1L1_HUMAN	Q8TED9	446	Y	1	Y	o	NA
ATX10_HUMAN	Q9UBB4	12	S	4	O	d	ind
ATX10_HUMAN	Q9UBB4	430	S	2	O	d	ind
RU2A_HUMAN	P09661	137	Y	1	Y	o	NA
RU2A_HUMAN	P09661	178	S	2	B	d	isl
RU2A_HUMAN	P09661	180	T	1	B	d	isl
RU2A_HUMAN	P09661	239	T	2	A	d	isl
RU2A_HUMAN	P09661	236	S	2	B	d	isl
CD40L_HUMAN	P29965	4	T	1	O	d	ind
CD44_HUMAN	P16070	706	S	4	A	d	isl
CD44_HUMAN	P16070	718	S	1	B	d	isl
CD44_HUMAN	P16070	686	S	4	B	d	isl
CD44_HUMAN	P16070	720	T	2	P	d	isl
CD44_HUMAN	P16070	697	S	4	B	d	isl
CD44_HUMAN	P16070	704	S	1	O	d	isl
RHG07_HUMAN	Q96QB1	577	S	1	P	d	ind
RHG07_HUMAN	Q96QB1	673	S	1	B	d	ind
RHG07_HUMAN	Q96QB1	740	T	1	O	d	isl
RHG07_HUMAN	Q96QB1	993	T	1	O	d	isl
RHG07_HUMAN	Q96QB1	738	T	1	O	d	isl
RHG07_HUMAN	Q96QB1	842	S	1	B	d	isl
RHG07_HUMAN	Q96QB1	523	S	2	A	d	isl
RHG07_HUMAN	Q96QB1	526	S	2	A	d	isl
RHG07_HUMAN	Q96QB1	750	S	1	O	d	isl
RHG07_HUMAN	Q96QB1	766	S	3	B	d	isl
RHG07_HUMAN	Q96QB1	850	S	1	O	d	isl
RHG07_HUMAN	Q96QB1	755	T	1	P	d	isl
RHG07_HUMAN	Q96QB1	757	S	2	P	d	isl
RHG07_HUMAN	Q96QB1	566	S	1	P	d	ind
RHG07_HUMAN	Q96QB1	986	S	1	B	d	isl
RHG07_HUMAN	Q96QB1	1244	S	3	B	d	ind
RHG07_HUMAN	Q96QB1	733	S	1	B	d	isl
RHG07_HUMAN	Q96QB1	747	S	1	A	d	isl
RHG07_HUMAN	Q96QB1	991	S	1	O	d	isl
RHG07_HUMAN	Q96QB1	544	S	1	O	d	ind
BIG1_HUMAN	Q9Y6D6	289	S	1	A	d	isl
BIG1_HUMAN	Q9Y6D6	290	S	1	A	d	isl
BIG1_HUMAN	Q9Y6D6	397	S	2	A	d	isl
BIG1_HUMAN	Q9Y6D6	1575	S	1	O	d	isl
BIG1_HUMAN	Q9Y6D6	1704	T	1	O	o	NA
BIG1_HUMAN	Q9Y6D6	234	S	2	P	d	isl
BIG1_HUMAN	Q9Y6D6	396	S	2	A	d	isl
BIG1_HUMAN	Q9Y6D6	237	S	2	A	d	isl
BIG1_HUMAN	Q9Y6D6	1566	S	1	O	d	isl
BIG1_HUMAN	Q9Y6D6	243	S	2	P	d	isl
BIG1_HUMAN	Q9Y6D6	52	S	2	P	d	ind
BIG1_HUMAN	Q9Y6D6	286	S	1	A	d	isl
BIG1_HUMAN	Q9Y6D6	1079	S	2	B	d	isl
BIG1_HUMAN	Q9Y6D6	1569	S	2	A	d	isl
BIG1_HUMAN	Q9Y6D6	1083	T	1	A	d	isl
BIG1_HUMAN	Q9Y6D6	664	S	1	B	d	ind
BIG1_HUMAN	Q9Y6D6	894	T	1	O	d	ind
ADCY1_HUMAN	Q08828	551	S	1	B	d	ind
TDRKH_HUMAN	Q9Y2W6	519	S	1	O	d	ind
RGS22_HUMAN	Q8NE09	377	S	1	B	d	ind
LTOR2_HUMAN	Q9Y2Q5	125	S	1	O	d	ind
AMPD2_HUMAN	Q01433	289	T	1	P	d	ind
AMPD2_HUMAN	Q01433	100	S	2	O	d	isl
AMPD2_HUMAN	Q01433	197	Y	1	Y	d	isl
AMPD2_HUMAN	Q01433	134	S	2	A	d	isl
AMPD2_HUMAN	Q01433	168	S	2	B	d	ind
AMPD2_HUMAN	Q01433	142	S	1	O	d	isl
AMPD2_HUMAN	Q01433	145	Y	1	Y	d	isl
AMPD2_HUMAN	Q01433	117	T	1	A	d	isl
AMPD2_HUMAN	Q01433	118	S	2	A	d	isl
AMPD2_HUMAN	Q01433	151	S	2	P	d	isl
AMPD2_HUMAN	Q01433	190	S	2	B	d	isl
AMPD2_HUMAN	Q01433	192	S	2	A	d	isl
CCYL1_HUMAN	Q8N7R7	97	T	1	B	d	isl
CCYL1_HUMAN	Q8N7R7	105	S	2	B	d	isl
CCYL1_HUMAN	Q8N7R7	93	S	1	O	d	isl
CCYL1_HUMAN	Q8N7R7	88	S	1	O	d	isl
CCYL1_HUMAN	Q8N7R7	112	S	2	P	d	isl
CCYL1_HUMAN	Q8N7R7	342	S	1	B	d	isl
CCYL1_HUMAN	Q8N7R7	344	S	2	B	d	isl
CCYL1_HUMAN	Q8N7R7	89	T	1	B	d	isl
CCYL1_HUMAN	Q8N7R7	122	S	1	B	o	NA
CCYL1_HUMAN	Q8N7R7	124	S	1	B	o	NA
CCYL1_HUMAN	Q8N7R7	125	T	1	O	o	NA
CCYL1_HUMAN	Q8N7R7	95	S	1	A	d	isl
TENA_HUMAN	P24821	70	S	2	O	d	isl
TENA_HUMAN	P24821	903	S	1	B	d	ind
TENA_HUMAN	P24821	72	S	2	A	d	isl
PPR3C_HUMAN	Q9UQK1	33	S	2	P	o	NA
PPR3C_HUMAN	Q9UQK1	293	S	2	P	o	NA
MYPOP_HUMAN	Q86VE0	378	S	1	P	d	ind
MYPOP_HUMAN	Q86VE0	44	S	1	O	o	NA
MYPOP_HUMAN	Q86VE0	389	T	1	B	d	ind
WWP2_HUMAN	O00308	369	Y	1	Y	d	ind
WWP2_HUMAN	O00308	211	S	2	P	d	ind
CDK14_HUMAN	O94921	134	S	2	B	d	isl
CDK14_HUMAN	O94921	76	T	1	B	d	isl
CDK14_HUMAN	O94921	78	S	2	B	d	isl
CDK14_HUMAN	O94921	112	S	1	P	d	isl
CDK14_HUMAN	O94921	145	S	1	O	d	isl
CDK14_HUMAN	O94921	146	Y	1	Y	d	isl
CDK14_HUMAN	O94921	119	S	1	B	d	isl
CDK14_HUMAN	O94921	24	S	2	B	d	ind
CDK14_HUMAN	O94921	122	S	1	B	d	isl
CDK14_HUMAN	O94921	123	S	1	P	d	isl
CDK14_HUMAN	O94921	120	S	1	P	d	isl
CDK14_HUMAN	O94921	125	T	1	O	d	isl
CDK14_HUMAN	O94921	126	S	1	P	d	isl
CDK14_HUMAN	O94921	95	S	2	B	d	ind
KCNQ1_HUMAN	P51787	409	S	1	P	d	ind
KCNQ1_HUMAN	P51787	27	S	4	B	d	ind
KCNQ1_HUMAN	P51787	92	S	1	O	d	ind
KCNQ1_HUMAN	P51787	470	T	1	B	d	ind
KCNQ1_HUMAN	P51787	95	S	1	O	o	NA
EFTU_HUMAN	P49411	312	S	1	A	o	NA
DONS_HUMAN	Q9NYP3	9	S	1	P	d	ind
AFAM_HUMAN	P43652	212	Y	1	Y	o	NA
BCAR3_HUMAN	O75815	130	T	1	P	d	isl
BCAR3_HUMAN	O75815	114	T	1	A	d	isl
BCAR3_HUMAN	O75815	375	S	2	P	d	isl
BCAR3_HUMAN	O75815	8	S	1	B	d	ind
BCAR3_HUMAN	O75815	42	Y	1	Y	d	ind
BCAR3_HUMAN	O75815	395	S	1	A	d	ind
BCAR3_HUMAN	O75815	429	Y	1	Y	d	ind
BCAR3_HUMAN	O75815	290	S	2	B	d	ind
BCAR3_HUMAN	O75815	338	S	1	A	d	ind
BCAR3_HUMAN	O75815	368	T	1	A	d	isl
BCAR3_HUMAN	O75815	209	S	1	A	o	NA
BCAR3_HUMAN	O75815	370	S	1	B	d	isl
BCAR3_HUMAN	O75815	83	S	2	P	d	ind
BCAR3_HUMAN	O75815	212	Y	1	Y	o	NA
BCAR3_HUMAN	O75815	117	Y	1	Y	d	isl
BCAR3_HUMAN	O75815	471	S	1	O	d	ind
BCAR3_HUMAN	O75815	317	S	1	B	d	ind
BCAR3_HUMAN	O75815	32	S	2	P	d	ind
ZDHC8_HUMAN	Q9ULC8	545	S	1	O	d	isl
ZDHC8_HUMAN	Q9ULC8	579	Y	1	Y	d	ind
ZDHC8_HUMAN	Q9ULC8	679	T	1	P	d	isl
ZDHC8_HUMAN	Q9ULC8	524	S	1	B	d	isl
ZDHC8_HUMAN	Q9ULC8	526	S	1	P	d	isl
ZDHC8_HUMAN	Q9ULC8	337	S	1	B	d	ind
ZDHC8_HUMAN	Q9ULC8	754	S	1	B	d	ind
ZDHC8_HUMAN	Q9ULC8	627	S	1	O	d	ind
ZDHC8_HUMAN	Q9ULC8	675	S	2	P	d	isl
ZDHC8_HUMAN	Q9ULC8	537	S	1	P	d	isl
ZDHC8_HUMAN	Q9ULC8	91	Y	1	Y	o	NA
ZDHC8_HUMAN	Q9ULC8	764	S	1	O	d	ind
ZDHC8_HUMAN	Q9ULC8	541	Y	1	Y	d	isl
ZDHC8_HUMAN	Q9ULC8	606	S	2	B	d	ind
EST1_HUMAN	P23141	403	Y	1	Y	o	NA
H2AV_HUMAN	Q71UI9	117	S	1	O	o	NA
OPSD_HUMAN	P08100	334	S	4	O	d	isl
OPSD_HUMAN	P08100	336	T	3	O	d	isl
OPSD_HUMAN	P08100	338	S	4	A	d	isl
OPSD_HUMAN	P08100	340	T	4	A	d	isl
OPSD_HUMAN	P08100	342	T	0	B	d	isl
OPSD_HUMAN	P08100	343	S	4	O	d	isl
CC151_HUMAN	A5D8V7	102	T	1	B	d	ind
TRIM1_HUMAN	Q9UJV3	98	T	1	B	o	NA
TRIM1_HUMAN	Q9UJV3	116	S	1	P	d	isl
TRIM1_HUMAN	Q9UJV3	727	Y	1	Y	d	ind
TRIM1_HUMAN	Q9UJV3	112	S	1	O	d	isl
TLE4_HUMAN	Q04727	321	S	2	O	d	isl
TLE4_HUMAN	Q04727	292	S	2	P	d	isl
TLE4_HUMAN	Q04727	325	T	2	P	d	isl
TLE4_HUMAN	Q04727	295	S	1	O	d	isl
TLE4_HUMAN	Q04727	265	S	1	P	d	isl
TLE4_HUMAN	Q04727	269	S	2	P	d	isl
TLE4_HUMAN	Q04727	206	S	1	B	d	isl
TLE4_HUMAN	Q04727	208	S	2	P	d	isl
TLE4_HUMAN	Q04727	273	S	1	P	d	isl
TLE4_HUMAN	Q04727	243	Y	1	Y	d	isl
TLE4_HUMAN	Q04727	245	S	1	B	d	isl
TLE4_HUMAN	Q04727	302	T	1	P	d	isl
TLE4_HUMAN	Q04727	250	S	2	A	d	isl
TLE4_HUMAN	Q04727	318	T	2	P	d	isl
TYY2_HUMAN	O15391	306	T	1	A	o	NA
TYY2_HUMAN	O15391	323	S	1	B	o	NA
MTM1_HUMAN	Q13496	297	S	1	A	d	ind
MTM1_HUMAN	Q13496	18	S	2	O	d	isl
MTM1_HUMAN	Q13496	13	S	2	A	d	isl
MTM1_HUMAN	Q13496	301	Y	1	Y	o	NA
NUP85_HUMAN	Q9BW27	393	Y	1	Y	o	NA
NUP85_HUMAN	Q9BW27	90	T	1	O	d	ind
NUP85_HUMAN	Q9BW27	652	S	1	B	d	ind
SLAF1_HUMAN	Q13291	281	Y	4	Y	o	NA
SLAF1_HUMAN	Q13291	307	Y	3	Y	o	NA
SLAF1_HUMAN	Q13291	327	Y	4	Y	o	NA
IKBP1_HUMAN	Q5VVH5	235	S	1	B	d	ind
IKBP1_HUMAN	Q5VVH5	247	T	1	A	d	ind
SBNO1_HUMAN	A3KN83	162	S	2	B	d	ind
SBNO1_HUMAN	A3KN83	1062	S	1	P	d	ind
SBNO1_HUMAN	A3KN83	754	S	2	B	d	isl
SBNO1_HUMAN	A3KN83	755	S	2	A	d	isl
SBNO1_HUMAN	A3KN83	692	S	1	O	d	isl
SBNO1_HUMAN	A3KN83	693	S	1	P	d	isl
SBNO1_HUMAN	A3KN83	214	S	2	P	d	ind
SBNO1_HUMAN	A3KN83	697	S	2	P	d	isl
SBNO1_HUMAN	A3KN83	794	S	2	B	d	ind
SBNO1_HUMAN	A3KN83	768	S	1	A	d	ind
MCM10_HUMAN	Q7L590	234	T	1	P	d	ind
MCM10_HUMAN	Q7L590	644	S	1	P	d	ind
MCM10_HUMAN	Q7L590	85	T	2	A	d	ind
MCM10_HUMAN	Q7L590	296	T	1	O	o	NA
MCM10_HUMAN	Q7L590	824	S	1	B	o	NA
ARHGF_HUMAN	O94989	33	S	1	P	d	ind
ARHGF_HUMAN	O94989	353	Y	3	Y	o	NA
ARHGF_HUMAN	O94989	109	S	1	P	d	ind
SYCC_HUMAN	P49589	60	Y	1	Y	o	NA
SYCC_HUMAN	P49589	19	S	2	P	d	ind
SYCC_HUMAN	P49589	260	Y	1	Y	o	NA
SYCC_HUMAN	P49589	307	S	2	A	d	ind
SYCC_HUMAN	P49589	63	S	1	O	o	NA
CCDC8_HUMAN	Q9H0W5	146	S	2	A	d	isl
CCDC8_HUMAN	Q9H0W5	142	S	2	A	d	isl
PHEX_HUMAN	P78562	193	T	2	O	o	NA
PHEX_HUMAN	P78562	190	T	2	O	o	NA
PHEX_HUMAN	P78562	7	S	1	A	d	ind
MOT1_HUMAN	P53985	483	S	2	P	d	isl
MOT1_HUMAN	P53985	498	S	2	P	d	isl
MOT1_HUMAN	P53985	489	T	1	A	d	isl
MOT1_HUMAN	P53985	466	T	2	A	d	isl
MOT1_HUMAN	P53985	467	S	2	A	d	isl
MOT1_HUMAN	P53985	213	S	2	A	d	ind
ACSF4_HUMAN	Q4L235	649	S	2	B	d	ind
STON2_HUMAN	Q8WXE9	746	S	1	B	d	ind
STON2_HUMAN	Q8WXE9	272	S	1	O	d	ind
STON2_HUMAN	Q8WXE9	302	S	2	B	d	ind
STON2_HUMAN	Q8WXE9	762	S	2	B	d	ind
DNM3B_HUMAN	Q9UBC3	98	S	1	B	d	isl
DNM3B_HUMAN	Q9UBC3	835	S	1	B	o	NA
DNM3B_HUMAN	Q9UBC3	100	S	2	P	d	isl
DNM3B_HUMAN	Q9UBC3	136	S	2	P	d	ind
DNM3B_HUMAN	Q9UBC3	202	S	2	P	d	ind
DNM3B_HUMAN	Q9UBC3	112	S	1	A	d	ind
DNM3B_HUMAN	Q9UBC3	51	S	1	B	d	isl
DNM3B_HUMAN	Q9UBC3	52	S	1	B	d	isl
DNM3B_HUMAN	Q9UBC3	53	S	1	B	d	isl
DNM3B_HUMAN	Q9UBC3	416	S	1	A	d	ind
ACADV_HUMAN	P49748	522	S	2	O	d	ind
ACADV_HUMAN	P49748	54	S	1	B	d	ind
REPI1_HUMAN	Q9BWE0	441	S	1	B	d	ind
REPI1_HUMAN	Q9BWE0	426	S	1	B	d	ind
NKD1_HUMAN	Q969G9	348	S	1	P	d	ind
SYN2_HUMAN	Q92777	421	T	2	P	d	isl
SYN2_HUMAN	Q92777	425	S	2	P	d	isl
SYN2_HUMAN	Q92777	10	S	3	B	d	ind
SYN2_HUMAN	Q92777	432	T	1	O	d	isl
SYN2_HUMAN	Q92777	542	S	1	B	d	ind
SYN2_HUMAN	Q92777	575	S	1	B	d	ind
TRPV4_HUMAN	Q9HBA0	253	Y	2	Y	o	NA
TRPV4_HUMAN	Q9HBA0	805	Y	1	Y	o	NA
TRPV4_HUMAN	Q9HBA0	110	Y	3	Y	d	ind
TRPV4_HUMAN	Q9HBA0	824	S	4	B	o	NA
HBA_HUMAN	P69905	36	S	2	O	o	NA
HBA_HUMAN	P69905	4	S	2	P	d	ind
HBA_HUMAN	P69905	135	T	1	O	o	NA
HBA_HUMAN	P69905	50	S	2	O	o	NA
HBA_HUMAN	P69905	9	T	2	O	o	NA
HBA_HUMAN	P69905	138	T	1	O	d	isl
HBA_HUMAN	P69905	43	Y	2	Y	o	NA
HBA_HUMAN	P69905	109	T	1	O	o	NA
HBA_HUMAN	P69905	82	S	1	O	o	NA
HBA_HUMAN	P69905	132	S	1	O	o	NA
HBA_HUMAN	P69905	53	S	2	O	d	ind
HBA_HUMAN	P69905	25	Y	2	Y	o	NA
HBA_HUMAN	P69905	139	S	1	O	d	isl
THS7A_HUMAN	Q9UPZ6	792	S	1	O	d	ind
PNISR_HUMAN	Q8TF01	321	S	2	A	d	isl
PNISR_HUMAN	Q8TF01	522	S	1	O	d	ind
PNISR_HUMAN	Q8TF01	530	T	1	O	d	ind
PNISR_HUMAN	Q8TF01	286	S	1	A	d	isl
PNISR_HUMAN	Q8TF01	672	S	1	B	d	ind
PNISR_HUMAN	Q8TF01	290	S	2	A	d	isl
PNISR_HUMAN	Q8TF01	304	S	1	O	d	isl
PNISR_HUMAN	Q8TF01	305	S	1	O	d	isl
PNISR_HUMAN	Q8TF01	309	T	1	O	d	isl
PNISR_HUMAN	Q8TF01	311	S	2	P	d	isl
PNISR_HUMAN	Q8TF01	561	S	1	B	d	ind
PNISR_HUMAN	Q8TF01	313	S	2	P	d	isl
PNISR_HUMAN	Q8TF01	571	S	1	B	d	isl
PNISR_HUMAN	Q8TF01	573	S	1	B	d	isl
PNISR_HUMAN	Q8TF01	575	S	1	B	d	isl
PNISR_HUMAN	Q8TF01	577	S	1	B	d	isl
PNISR_HUMAN	Q8TF01	204	S	2	B	d	ind
PNISR_HUMAN	Q8TF01	211	S	2	P	d	ind
PNISR_HUMAN	Q8TF01	597	S	1	B	d	isl
PNISR_HUMAN	Q8TF01	726	S	2	B	d	ind
PNISR_HUMAN	Q8TF01	601	S	1	A	d	isl
PNISR_HUMAN	Q8TF01	485	T	2	P	d	ind
PNISR_HUMAN	Q8TF01	611	S	1	P	d	isl
PNISR_HUMAN	Q8TF01	613	S	2	B	d	isl
BTLA_HUMAN	Q7Z6A9	257	Y	2	Y	o	NA
RIOX1_HUMAN	Q9H6W3	66	S	1	A	d	isl
RIOX1_HUMAN	Q9H6W3	60	S	1	A	d	isl
RIOX1_HUMAN	Q9H6W3	63	S	1	A	d	isl
SAFB2_HUMAN	Q14151	226	S	2	A	d	ind
SAFB2_HUMAN	Q14151	100	T	1	A	d	ind
SAFB2_HUMAN	Q14151	613	S	2	A	d	ind
SAFB2_HUMAN	Q14151	262	S	1	O	d	ind
SAFB2_HUMAN	Q14151	234	S	2	A	d	ind
SAFB2_HUMAN	Q14151	331	S	2	A	d	isl
SAFB2_HUMAN	Q14151	49	T	1	B	d	isl
SAFB2_HUMAN	Q14151	339	T	1	A	d	isl
SAFB2_HUMAN	Q14151	54	S	2	O	d	isl
SAFB2_HUMAN	Q14151	343	S	2	P	d	isl
SAFB2_HUMAN	Q14151	444	S	1	P	o	NA
SAFB2_HUMAN	Q14151	349	S	2	A	d	isl
JADE2_HUMAN	Q9NQC1	9	S	2	B	d	isl
JADE2_HUMAN	Q9NQC1	12	S	2	A	d	isl
JADE2_HUMAN	Q9NQC1	15	S	2	A	d	isl
KCD16_HUMAN	Q68DU8	370	T	1	B	d	isl
KCD16_HUMAN	Q68DU8	363	S	1	B	d	isl
KCD16_HUMAN	Q68DU8	112	Y	2	Y	o	NA
KCD16_HUMAN	Q68DU8	373	S	1	A	d	isl
KCD16_HUMAN	Q68DU8	376	S	1	O	d	isl
CCSAP_HUMAN	Q6IQ19	240	S	1	B	d	ind
ZN185_HUMAN	O15231	67	S	1	A	d	isl
ZN185_HUMAN	O15231	519	S	1	P	d	ind
ZN185_HUMAN	O15231	203	S	1	B	d	ind
ZN185_HUMAN	O15231	152	S	1	B	d	isl
ZN185_HUMAN	O15231	153	S	1	B	d	isl
ZN185_HUMAN	O15231	155	S	1	A	d	isl
ZN185_HUMAN	O15231	64	S	1	B	d	isl
ODO2_HUMAN	P36957	81	S	1	A	o	NA
KRT81_HUMAN	Q14533	49	S	1	O	d	ind
KC1E_HUMAN	P49674	389	S	4	A	d	ind
KC1E_HUMAN	P49674	343	S	4	B	d	ind
KC1E_HUMAN	P49674	363	S	4	P	d	ind
KC1E_HUMAN	P49674	405	S	4	O	d	isl
KC1E_HUMAN	P49674	407	T	4	O	d	isl
KC1E_HUMAN	P49674	408	S	4	O	d	isl
KC1E_HUMAN	P49674	325	T	2	O	d	ind
GCSH_HUMAN	P23434	49	S	1	O	o	NA
GCSH_HUMAN	P23434	160	S	1	A	d	ind
BET1_HUMAN	O15155	50	S	2	B	o	NA
BET1_HUMAN	O15155	69	S	1	A	d	ind
BET1_HUMAN	O15155	48	S	1	B	o	NA
KCNN1_HUMAN	Q92952	107	S	1	B	o	NA
KCNN1_HUMAN	Q92952	109	Y	2	Y	o	NA
SHD_HUMAN	Q96IW2	144	Y	1	Y	d	ind
EPHA2_HUMAN	P29317	897	S	4	B	d	isl
EPHA2_HUMAN	P29317	898	T	2	O	d	isl
EPHA2_HUMAN	P29317	579	S	2	A	d	isl
EPHA2_HUMAN	P29317	772	Y	4	Y	d	isl
EPHA2_HUMAN	P29317	901	S	4	A	d	isl
EPHA2_HUMAN	P29317	774	T	1	O	o	NA
EPHA2_HUMAN	P29317	775	S	1	O	o	NA
EPHA2_HUMAN	P29317	587	T	1	A	d	isl
EPHA2_HUMAN	P29317	588	Y	4	Y	d	isl
EPHA2_HUMAN	P29317	771	T	1	O	d	isl
EPHA2_HUMAN	P29317	593	T	1	A	o	NA
EPHA2_HUMAN	P29317	594	Y	4	Y	o	NA
EPHA2_HUMAN	P29317	628	Y	4	Y	o	NA
EPHA2_HUMAN	P29317	735	Y	4	Y	o	NA
EPHA2_HUMAN	P29317	570	S	2	P	d	isl
EPHA2_HUMAN	P29317	921	Y	4	Y	o	NA
EPHA2_HUMAN	P29317	761	S	1	O	o	NA
EPHA2_HUMAN	P29317	892	S	2	O	o	NA
EPHA2_HUMAN	P29317	899	S	2	A	d	isl
EPHA2_HUMAN	P29317	960	Y	2	Y	o	NA
RIPR3_HUMAN	Q96MK2	345	T	2	P	d	ind
RIPR3_HUMAN	Q96MK2	64	S	1	B	d	ind
ZC12B_HUMAN	Q5HYM0	436	S	1	B	d	ind
RBM42_HUMAN	Q9BTD8	135	S	2	P	d	ind
RAB43_HUMAN	Q86YS6	49	S	1	B	o	NA
RAB43_HUMAN	Q86YS6	82	T	1	B	o	NA
VDAC3_HUMAN	Q9Y277	250	T	1	O	o	NA
VDAC3_HUMAN	Q9Y277	4	T	2	P	d	ind
VDAC3_HUMAN	Q9Y277	48	Y	1	Y	d	ind
DOCK3_HUMAN	Q8IZD9	1203	Y	1	Y	o	NA
DOCK3_HUMAN	Q8IZD9	1559	Y	1	Y	o	NA
PPM1A_HUMAN	P35813	377	S	1	A	d	isl
PPM1A_HUMAN	P35813	190	S	1	O	o	NA
PPM1A_HUMAN	P35813	375	S	2	O	d	isl
RPA43_HUMAN	Q3B726	60	S	2	P	o	NA
RPA43_HUMAN	Q3B726	328	S	2	P	d	isl
RPA43_HUMAN	Q3B726	300	S	2	O	d	isl
RPA43_HUMAN	Q3B726	302	Y	2	Y	d	isl
RPA43_HUMAN	Q3B726	304	S	2	A	d	isl
RPA43_HUMAN	Q3B726	316	S	2	B	d	isl
EIF3F_HUMAN	O00303	241	Y	1	Y	o	NA
EIF3F_HUMAN	O00303	258	S	2	P	o	NA
EIF3F_HUMAN	O00303	255	T	2	O	o	NA
SC6A3_HUMAN	Q01959	2	S	1	O	d	isl
SC6A3_HUMAN	Q01959	4	S	1	O	d	isl
SC6A3_HUMAN	Q01959	613	T	3	B	o	NA
SC6A3_HUMAN	Q01959	7	S	4	B	d	isl
SC6A3_HUMAN	Q01959	12	S	3	O	d	isl
SC6A3_HUMAN	Q01959	13	S	1	O	d	isl
SC6A3_HUMAN	Q01959	53	S	3	P	d	ind
SC6A3_HUMAN	Q01959	62	T	1	O	o	NA
CE047_HUMAN	Q569G3	129	S	1	O	d	ind
TGON2_HUMAN	O43493	298	S	2	B	d	ind
TGON2_HUMAN	O43493	347	S	1	B	d	isl
TGON2_HUMAN	O43493	331	T	1	A	d	ind
TGON2_HUMAN	O43493	351	S	2	A	d	isl
HCLS1_HUMAN	P14317	198	Y	2	Y	o	NA
HCLS1_HUMAN	P14317	103	Y	2	Y	d	ind
HCLS1_HUMAN	P14317	360	Y	3	Y	d	ind
HCLS1_HUMAN	P14317	397	Y	4	Y	d	ind
HCLS1_HUMAN	P14317	140	Y	1	Y	d	ind
HCLS1_HUMAN	P14317	333	T	1	A	d	ind
HCLS1_HUMAN	P14317	62	S	1	A	d	ind
HCLS1_HUMAN	P14317	175	Y	1	Y	d	isl
HCLS1_HUMAN	P14317	222	Y	4	Y	d	ind
HCLS1_HUMAN	P14317	177	Y	1	Y	d	isl
HCLS1_HUMAN	P14317	153	Y	1	Y	d	ind
HCLS1_HUMAN	P14317	378	Y	4	Y	d	ind
HCLS1_HUMAN	P14317	124	Y	1	Y	d	ind
HCLS1_HUMAN	P14317	190	Y	1	Y	d	isl
DIDO1_HUMAN	Q9BTC0	1030	S	2	P	d	isl
DIDO1_HUMAN	Q9BTC0	8	S	1	A	d	ind
DIDO1_HUMAN	Q9BTC0	1034	S	1	A	d	isl
DIDO1_HUMAN	Q9BTC0	1035	T	2	A	d	isl
DIDO1_HUMAN	Q9BTC0	1036	S	1	A	d	isl
DIDO1_HUMAN	Q9BTC0	1040	S	2	P	d	isl
DIDO1_HUMAN	Q9BTC0	660	S	1	O	d	ind
DIDO1_HUMAN	Q9BTC0	151	T	2	A	d	isl
DIDO1_HUMAN	Q9BTC0	152	S	2	A	d	isl
DIDO1_HUMAN	Q9BTC0	154	S	2	A	d	isl
DIDO1_HUMAN	Q9BTC0	156	S	2	A	d	isl
DIDO1_HUMAN	Q9BTC0	1312	S	2	P	d	ind
DIDO1_HUMAN	Q9BTC0	1827	S	1	P	d	ind
DIDO1_HUMAN	Q9BTC0	805	S	2	P	d	isl
DIDO1_HUMAN	Q9BTC0	114	S	1	A	d	isl
DIDO1_HUMAN	Q9BTC0	809	S	2	A	d	isl
DIDO1_HUMAN	Q9BTC0	811	S	2	A	d	isl
DIDO1_HUMAN	Q9BTC0	1714	S	2	P	d	ind
DIDO1_HUMAN	Q9BTC0	60	S	2	O	d	ind
DIDO1_HUMAN	Q9BTC0	1254	S	2	O	d	isl
DIDO1_HUMAN	Q9BTC0	1255	T	2	O	d	isl
DIDO1_HUMAN	Q9BTC0	1256	T	2	P	d	isl
DIDO1_HUMAN	Q9BTC0	1260	S	2	P	d	isl
DIDO1_HUMAN	Q9BTC0	1522	S	2	P	d	ind
DIDO1_HUMAN	Q9BTC0	117	S	1	A	d	isl
DIDO1_HUMAN	Q9BTC0	1018	S	1	B	d	isl
DIDO1_HUMAN	Q9BTC0	1019	S	2	P	d	isl
TBC30_HUMAN	Q9Y2I9	800	S	1	P	d	ind
CYTSA_HUMAN	Q69YQ0	385	S	1	B	d	isl
CYTSA_HUMAN	Q69YQ0	833	T	1	B	d	isl
CYTSA_HUMAN	Q69YQ0	835	S	1	A	d	isl
CYTSA_HUMAN	Q69YQ0	868	S	2	P	d	isl
CYTSA_HUMAN	Q69YQ0	389	S	1	A	d	isl
CYTSA_HUMAN	Q69YQ0	870	S	2	P	d	isl
CYTSA_HUMAN	Q69YQ0	384	S	2	B	d	isl
CYTSA_HUMAN	Q69YQ0	392	S	1	O	d	isl
CYTSA_HUMAN	Q69YQ0	874	T	2	P	d	isl
CYTSA_HUMAN	Q69YQ0	171	S	1	B	d	ind
CYTSA_HUMAN	Q69YQ0	881	S	2	P	d	isl
CYTSA_HUMAN	Q69YQ0	831	S	2	B	d	isl
CYTSA_HUMAN	Q69YQ0	948	S	1	B	d	ind
CYTSA_HUMAN	Q69YQ0	277	S	1	A	d	ind
CYTSA_HUMAN	Q69YQ0	54	S	1	B	d	ind
CYTSA_HUMAN	Q69YQ0	887	S	2	O	d	isl
CYTSA_HUMAN	Q69YQ0	922	S	1	B	d	ind
CYTSA_HUMAN	Q69YQ0	828	S	1	O	d	isl
CYTSA_HUMAN	Q69YQ0	834	S	2	A	d	isl
CYTSA_HUMAN	Q69YQ0	832	S	2	B	d	isl
CLD1_HUMAN	O95832	205	S	3	O	d	isl
CLD1_HUMAN	O95832	206	S	3	A	d	isl
XPO2_HUMAN	P55060	377	S	1	A	d	ind
XPO2_HUMAN	P55060	18	T	1	A	d	ind
XPO2_HUMAN	P55060	931	S	2	O	o	NA
XPO2_HUMAN	P55060	112	S	2	B	o	NA
RHGBA_HUMAN	Q6P4F7	675	S	2	P	d	ind
RHGBA_HUMAN	Q6P4F7	868	S	2	P	d	ind
RHGBA_HUMAN	Q6P4F7	422	S	2	P	d	ind
RHGBA_HUMAN	Q6P4F7	323	T	2	P	d	ind
RHGBA_HUMAN	Q6P4F7	787	S	1	B	d	ind
RHGBA_HUMAN	Q6P4F7	836	T	1	P	d	ind
RHGBA_HUMAN	Q6P4F7	728	S	1	P	d	ind
RHGBA_HUMAN	Q6P4F7	508	T	2	P	d	ind
RHGBA_HUMAN	Q6P4F7	285	S	2	B	d	ind
RHGBA_HUMAN	Q6P4F7	318	S	2	P	d	ind
BTG1_HUMAN	P62324	159	S	4	P	d	ind
PP14C_HUMAN	Q8TAE6	25	S	2	P	d	ind
PP14C_HUMAN	Q8TAE6	33	S	2	P	d	ind
PP14C_HUMAN	Q8TAE6	158	S	1	P	d	ind
PP14C_HUMAN	Q8TAE6	73	T	4	O	d	ind
IP3KC_HUMAN	Q96DU7	336	T	2	P	d	ind
MOT10_HUMAN	Q8TF71	498	S	2	O	d	isl
MOT10_HUMAN	Q8TF71	269	S	2	O	d	isl
MOT10_HUMAN	Q8TF71	501	S	2	O	d	isl
MOT10_HUMAN	Q8TF71	263	S	1	B	d	isl
MOT10_HUMAN	Q8TF71	504	S	1	O	d	isl
CCD91_HUMAN	Q7Z6B0	417	S	1	A	o	NA
EEA1_HUMAN	Q15075	241	T	1	A	d	isl
EEA1_HUMAN	Q15075	70	S	2	O	d	ind
EEA1_HUMAN	Q15075	9	T	1	P	d	ind
EEA1_HUMAN	Q15075	235	T	1	A	d	isl
EEA1_HUMAN	Q15075	1392	T	3	P	d	ind
EEA1_HUMAN	Q15075	1265	S	1	B	d	ind
EEA1_HUMAN	Q15075	52	S	2	A	o	NA
EEA1_HUMAN	Q15075	248	S	1	A	d	isl
ADDA_HUMAN	P35611	11	T	1	O	d	isl
ADDA_HUMAN	P35611	12	S	4	P	d	isl
ADDA_HUMAN	P35611	16	T	1	O	d	isl
ADDA_HUMAN	P35611	532	S	1	O	o	NA
ADDA_HUMAN	P35611	408	S	3	B	d	isl
ADDA_HUMAN	P35611	35	Y	1	Y	d	ind
ADDA_HUMAN	P35611	550	Y	1	Y	o	NA
ADDA_HUMAN	P35611	423	S	1	A	d	isl
ADDA_HUMAN	P35611	427	S	1	O	d	isl
ADDA_HUMAN	P35611	429	T	1	O	d	isl
ADDA_HUMAN	P35611	431	S	2	P	d	isl
ADDA_HUMAN	P35611	436	S	4	O	d	isl
ADDA_HUMAN	P35611	59	S	4	B	d	isl
ADDA_HUMAN	P35611	64	S	2	P	d	isl
ADDA_HUMAN	P35611	353	S	2	B	d	isl
ADDA_HUMAN	P35611	457	S	1	A	d	isl
ADDA_HUMAN	P35611	586	S	1	A	d	ind
ADDA_HUMAN	P35611	716	S	4	B	d	isl
ADDA_HUMAN	P35611	355	S	4	P	d	isl
ADDA_HUMAN	P35611	464	S	1	O	d	isl
ADDA_HUMAN	P35611	465	S	4	P	d	isl
ADDA_HUMAN	P35611	724	T	1	P	d	isl
ADDA_HUMAN	P35611	726	S	4	B	d	isl
ADDA_HUMAN	P35611	600	S	3	P	d	ind
ADDA_HUMAN	P35611	480	T	3	B	d	isl
ADDA_HUMAN	P35611	481	S	3	O	d	isl
ADDA_HUMAN	P35611	482	T	1	B	d	isl
ADDA_HUMAN	P35611	483	S	1	O	d	isl
ADDA_HUMAN	P35611	613	S	1	O	d	isl
ADDA_HUMAN	P35611	358	S	2	P	d	isl
ADDA_HUMAN	P35611	364	T	1	O	d	isl
ADDA_HUMAN	P35611	366	S	2	P	d	isl
ADDA_HUMAN	P35611	614	T	1	P	d	isl
VRK1_HUMAN	Q99986	355	T	4	B	d	ind
VRK1_HUMAN	Q99986	376	S	2	O	d	ind
CA198_HUMAN	Q9H425	129	S	1	A	d	ind
CA198_HUMAN	Q9H425	37	S	2	P	d	ind
CA198_HUMAN	Q9H425	175	S	2	B	d	ind
AIFM3_HUMAN	Q96NN9	36	S	1	P	d	ind
ZBT21_HUMAN	Q9ULJ3	345	S	2	B	d	isl
ZBT21_HUMAN	Q9ULJ3	422	S	2	P	d	isl
ZBT21_HUMAN	Q9ULJ3	1003	S	2	P	d	isl
ZBT21_HUMAN	Q9ULJ3	332	S	1	O	d	ind
ZBT21_HUMAN	Q9ULJ3	1005	T	2	O	d	isl
ZBT21_HUMAN	Q9ULJ3	431	T	2	B	d	isl
ZBT21_HUMAN	Q9ULJ3	177	S	1	P	d	ind
ZBT21_HUMAN	Q9ULJ3	434	S	2	B	d	isl
ZBT21_HUMAN	Q9ULJ3	435	S	2	P	d	isl
ZBT21_HUMAN	Q9ULJ3	981	S	1	P	d	isl
ZBT21_HUMAN	Q9ULJ3	438	S	2	A	d	isl
ZBT21_HUMAN	Q9ULJ3	343	S	2	B	d	isl
ZBT21_HUMAN	Q9ULJ3	409	S	1	B	d	isl
ZBT21_HUMAN	Q9ULJ3	983	S	2	P	d	isl
ZBT21_HUMAN	Q9ULJ3	411	S	2	B	d	isl
ZBT21_HUMAN	Q9ULJ3	348	S	1	O	d	isl
ZBT21_HUMAN	Q9ULJ3	416	T	1	A	d	isl
GGA2_HUMAN	Q9UJY4	233	S	1	B	d	ind
GGA2_HUMAN	Q9UJY4	284	S	1	B	o	NA
GGA2_HUMAN	Q9UJY4	278	T	1	B	o	NA
PRPS2_HUMAN	P11908	308	S	1	O	d	ind
BNC1_HUMAN	Q01954	338	S	1	P	d	ind
BNC1_HUMAN	Q01954	563	S	1	A	d	isl
BNC1_HUMAN	Q01954	573	S	1	A	d	isl
BNC1_HUMAN	Q01954	989	S	1	P	d	ind
BNC1_HUMAN	Q01954	562	S	1	A	d	isl
EXOC7_HUMAN	Q9UPT5	250	S	4	P	d	ind
EXOC7_HUMAN	Q9UPT5	283	S	1	B	d	ind
CE030_HUMAN	Q96GV9	132	S	1	B	d	ind
CE030_HUMAN	Q96GV9	37	S	1	B	d	isl
CE030_HUMAN	Q96GV9	38	S	1	B	d	isl
CE030_HUMAN	Q96GV9	167	S	2	A	d	ind
CE030_HUMAN	Q96GV9	42	S	1	P	d	isl
CE030_HUMAN	Q96GV9	25	S	2	P	d	isl
FNIP1_HUMAN	Q8TF40	259	S	1	O	d	isl
FNIP1_HUMAN	Q8TF40	292	S	1	B	d	isl
FNIP1_HUMAN	Q8TF40	261	S	2	B	d	isl
FNIP1_HUMAN	Q8TF40	294	T	2	B	d	isl
FNIP1_HUMAN	Q8TF40	232	S	1	B	d	ind
FNIP1_HUMAN	Q8TF40	714	S	1	A	d	ind
FNIP1_HUMAN	Q8TF40	296	S	2	A	d	isl
FNIP1_HUMAN	Q8TF40	686	S	1	O	o	NA
FNIP1_HUMAN	Q8TF40	272	S	2	P	d	isl
FNIP1_HUMAN	Q8TF40	593	S	2	B	d	isl
FNIP1_HUMAN	Q8TF40	946	S	1	A	d	ind
FNIP1_HUMAN	Q8TF40	181	S	1	A	o	NA
FNIP1_HUMAN	Q8TF40	594	S	2	B	d	isl
FNIP1_HUMAN	Q8TF40	760	S	2	P	d	isl
FNIP1_HUMAN	Q8TF40	763	S	2	A	d	isl
FNIP1_HUMAN	Q8TF40	220	S	2	B	d	ind
FNIP1_HUMAN	Q8TF40	254	S	1	O	d	isl
MDM4_HUMAN	O15151	403	S	4	A	d	ind
MDM4_HUMAN	O15151	365	T	1	B	d	isl
MDM4_HUMAN	O15151	342	S	4	A	d	ind
MDM4_HUMAN	O15151	367	S	4	B	d	isl
AKA10_HUMAN	O43572	173	S	1	B	d	isl
AKA10_HUMAN	O43572	52	S	2	P	d	isl
AKA10_HUMAN	O43572	278	S	1	P	d	isl
AKA10_HUMAN	O43572	56	S	1	O	d	isl
AKA10_HUMAN	O43572	281	S	2	P	d	isl
AKA10_HUMAN	O43572	187	S	2	P	d	isl
AKA10_HUMAN	O43572	189	S	2	O	d	isl
AKA10_HUMAN	O43572	96	S	1	B	d	ind
SNAT_HUMAN	Q16613	31	T	4	B	d	ind
DCAF5_HUMAN	Q96JK2	929	T	1	A	d	isl
DCAF5_HUMAN	Q96JK2	628	S	1	P	d	isl
DCAF5_HUMAN	Q96JK2	931	S	1	A	d	isl
DCAF5_HUMAN	Q96JK2	500	T	1	P	d	ind
DCAF5_HUMAN	Q96JK2	626	S	1	O	d	isl
DCAF5_HUMAN	Q96JK2	468	S	1	P	d	ind
DCAF5_HUMAN	Q96JK2	631	S	1	A	d	isl
DCAF5_HUMAN	Q96JK2	632	S	1	P	d	isl
ETS2_HUMAN	P15036	313	S	3	A	d	isl
ETS2_HUMAN	P15036	310	S	3	B	d	isl
ETS2_HUMAN	P15036	72	T	4	P	o	NA
MARCS_HUMAN	P29966	131	S	2	O	d	isl
MARCS_HUMAN	P29966	132	S	2	O	d	isl
MARCS_HUMAN	P29966	133	T	1	O	d	isl
MARCS_HUMAN	P29966	134	S	2	O	d	isl
MARCS_HUMAN	P29966	135	S	2	P	d	isl
MARCS_HUMAN	P29966	145	S	2	P	d	isl
MARCS_HUMAN	P29966	147	S	2	A	d	isl
MARCS_HUMAN	P29966	150	T	2	P	d	isl
MARCS_HUMAN	P29966	26	S	2	O	d	isl
MARCS_HUMAN	P29966	27	S	4	P	d	isl
MARCS_HUMAN	P29966	29	S	2	O	d	isl
MARCS_HUMAN	P29966	159	S	4	B	d	isl
MARCS_HUMAN	P29966	262	S	0	A	d	ind
MARCS_HUMAN	P29966	163	S	4	B	d	isl
MARCS_HUMAN	P29966	167	S	4	B	d	isl
MARCS_HUMAN	P29966	170	S	4	O	d	isl
MARCS_HUMAN	P29966	46	S	4	P	d	ind
MARCS_HUMAN	P29966	63	S	2	O	d	ind
MARCS_HUMAN	P29966	77	S	2	O	d	isl
MARCS_HUMAN	P29966	81	S	2	P	d	isl
MARCS_HUMAN	P29966	118	S	2	P	d	ind
MARCS_HUMAN	P29966	128	S	2	O	d	isl
RL15_HUMAN	P61313	97	S	2	B	o	NA
RL15_HUMAN	P61313	34	S	1	B	o	NA
RL15_HUMAN	P61313	100	S	2	A	o	NA
RL15_HUMAN	P61313	197	T	1	B	d	ind
RL15_HUMAN	P61313	81	Y	1	Y	d	ind
RL15_HUMAN	P61313	59	Y	1	Y	d	ind
DCA11_HUMAN	Q8TEB1	11	S	1	O	d	ind
DCA11_HUMAN	Q8TEB1	75	S	1	A	d	ind
DCA11_HUMAN	Q8TEB1	91	Y	1	Y	d	ind
DCA11_HUMAN	Q8TEB1	147	S	1	O	d	ind
ZBTB3_HUMAN	Q9H5J0	362	S	2	A	d	ind
UNKL_HUMAN	Q9H9P5	15	S	1	P	d	ind
NMT2_HUMAN	O60551	66	S	1	A	d	isl
NMT2_HUMAN	O60551	68	S	1	B	d	isl
NMT2_HUMAN	O60551	38	S	2	P	d	ind
NMT2_HUMAN	O60551	338	S	0	O	d	ind
NMT2_HUMAN	O60551	61	S	1	B	d	isl
NMT2_HUMAN	O60551	70	S	1	A	d	isl
AGTR1_HUMAN	P30556	338	S	1	O	d	ind
AGTR1_HUMAN	P30556	319	Y	4	Y	o	NA
AT133_HUMAN	Q9H7F0	817	S	2	A	o	NA
AT133_HUMAN	Q9H7F0	1219	S	1	O	o	NA
AT133_HUMAN	Q9H7F0	909	S	1	P	d	ind
CSTF1_HUMAN	Q05048	393	S	1	B	o	NA
CSTF1_HUMAN	Q05048	367	Y	2	Y	o	NA
GON4L_HUMAN	Q3T8J9	865	T	1	O	o	NA
GON4L_HUMAN	Q3T8J9	346	S	2	P	d	ind
GON4L_HUMAN	Q3T8J9	413	S	1	B	d	isl
GON4L_HUMAN	Q3T8J9	418	T	1	A	d	isl
GON4L_HUMAN	Q3T8J9	426	S	1	A	d	isl
TM121_HUMAN	Q9BTD3	263	T	1	B	o	NA
STRN4_HUMAN	Q9NRL3	201	S	1	B	d	isl
STRN4_HUMAN	Q9NRL3	276	S	2	A	d	ind
STRN4_HUMAN	Q9NRL3	284	S	2	O	d	ind
STRN4_HUMAN	Q9NRL3	53	S	2	P	d	ind
STRN4_HUMAN	Q9NRL3	206	S	2	A	d	isl
IFFO2_HUMAN	Q5TF58	333	S	1	B	d	ind
MYDGF_HUMAN	Q969H8	104	Y	1	Y	o	NA
MIEN1_HUMAN	Q9BRT3	97	S	1	B	o	NA
K0754_HUMAN	O94854	619	S	2	P	d	ind
K0754_HUMAN	O94854	181	S	1	B	d	ind
K0754_HUMAN	O94854	122	T	1	O	d	ind
K0754_HUMAN	O94854	442	S	1	P	d	ind
K0754_HUMAN	O94854	155	S	1	P	d	ind
K0754_HUMAN	O94854	64	S	1	O	d	ind
ITPR1_HUMAN	Q14643	353	Y	4	Y	d	ind
ITPR1_HUMAN	Q14643	2690	S	3	B	d	isl
ITPR1_HUMAN	Q14643	131	Y	1	Y	o	NA
ITPR1_HUMAN	Q14643	1764	S	4	B	d	isl
ITPR1_HUMAN	Q14643	421	S	4	P	d	ind
ITPR1_HUMAN	Q14643	1766	T	1	B	d	isl
ITPR1_HUMAN	Q14643	1767	S	2	B	d	isl
ITPR1_HUMAN	Q14643	2696	S	1	A	d	isl
ITPR1_HUMAN	Q14643	1603	S	1	A	o	NA
ITPR1_HUMAN	Q14643	1774	S	3	O	d	isl
ITPR1_HUMAN	Q14643	436	S	3	P	o	NA
ITPR1_HUMAN	Q14643	133	T	1	B	o	NA
ITPR1_HUMAN	Q14643	955	T	1	P	o	NA
ITPR1_HUMAN	Q14643	2721	S	1	O	d	ind
ITPR1_HUMAN	Q14643	1598	S	4	B	d	ind
ITPR1_HUMAN	Q14643	800	T	4	P	o	NA
MZF1_HUMAN	P28698	274	S	2	P	d	ind
MZF1_HUMAN	P28698	256	S	2	P	o	NA
MZF1_HUMAN	P28698	294	S	2	P	d	ind
MZF1_HUMAN	P28698	592	T	1	B	d	ind
CEBPD_HUMAN	P49716	167	S	2	P	d	ind
CEBPD_HUMAN	P49716	191	S	1	P	d	ind
CEBPD_HUMAN	P49716	256	S	1	P	d	ind
PAIRB_HUMAN	Q8NC51	388	T	1	A	d	isl
PAIRB_HUMAN	Q8NC51	391	S	2	B	d	isl
PAIRB_HUMAN	Q8NC51	392	S	2	B	d	isl
PAIRB_HUMAN	Q8NC51	394	S	2	A	d	isl
PAIRB_HUMAN	Q8NC51	152	S	1	A	d	ind
PAIRB_HUMAN	Q8NC51	25	S	2	A	d	ind
PAIRB_HUMAN	Q8NC51	53	S	1	O	d	ind
PAIRB_HUMAN	Q8NC51	197	S	2	A	d	isl
PAIRB_HUMAN	Q8NC51	328	S	2	A	d	isl
PAIRB_HUMAN	Q8NC51	330	S	2	B	d	isl
PAIRB_HUMAN	Q8NC51	203	S	2	O	d	isl
PAIRB_HUMAN	Q8NC51	205	S	2	O	d	isl
PAIRB_HUMAN	Q8NC51	207	Y	1	Y	d	isl
PAIRB_HUMAN	Q8NC51	208	S	2	O	d	isl
PAIRB_HUMAN	Q8NC51	219	S	1	B	d	isl
PAIRB_HUMAN	Q8NC51	221	S	2	B	d	isl
PAIRB_HUMAN	Q8NC51	353	S	1	A	d	ind
PAIRB_HUMAN	Q8NC51	232	T	2	A	d	isl
PAIRB_HUMAN	Q8NC51	234	S	2	P	d	isl
PAIRB_HUMAN	Q8NC51	243	S	1	B	d	isl
PAIRB_HUMAN	Q8NC51	244	Y	1	Y	d	isl
PAIRB_HUMAN	Q8NC51	247	S	1	A	d	isl
PAIRB_HUMAN	Q8NC51	252	S	2	O	d	isl
PAIRB_HUMAN	Q8NC51	255	T	2	A	d	isl
DDHD2_HUMAN	O94830	593	S	1	O	d	isl
DDHD2_HUMAN	O94830	373	S	1	A	d	ind
DDHD2_HUMAN	O94830	447	S	1	B	d	ind
DDHD2_HUMAN	O94830	583	S	1	A	d	isl
ACE_HUMAN	P12821	1299	S	4	A	d	ind
NECT1_HUMAN	Q15223	422	S	2	A	d	ind
NECT1_HUMAN	Q15223	396	Y	1	Y	d	ind
NECT1_HUMAN	Q15223	468	Y	1	Y	d	ind
NECT1_HUMAN	Q15223	434	S	2	A	d	isl
NECT1_HUMAN	Q15223	435	S	1	A	d	isl
NECT1_HUMAN	Q15223	436	Y	1	Y	d	isl
NECT1_HUMAN	Q15223	511	S	1	A	o	NA
ZBTB6_HUMAN	Q15916	202	S	2	P	d	ind
ZBTB6_HUMAN	Q15916	408	S	1	A	d	ind
TMM47_HUMAN	Q9BQJ4	3	S	1	O	d	isl
TMM47_HUMAN	Q9BQJ4	6	S	1	A	d	isl
STIM1_HUMAN	Q13586	257	S	2	A	d	ind
STIM1_HUMAN	Q13586	517	T	2	B	d	isl
STIM1_HUMAN	Q13586	519	S	2	A	d	isl
STIM1_HUMAN	Q13586	40	S	1	A	d	ind
STIM1_HUMAN	Q13586	361	Y	1	Y	o	NA
STIM1_HUMAN	Q13586	523	S	2	O	d	isl
STIM1_HUMAN	Q13586	524	S	1	O	d	isl
STIM1_HUMAN	Q13586	621	S	4	P	d	ind
STIM1_HUMAN	Q13586	528	S	1	A	d	isl
STIM1_HUMAN	Q13586	521	S	2	A	d	isl
STIM1_HUMAN	Q13586	595	S	1	B	d	ind
STIM1_HUMAN	Q13586	628	S	2	P	d	ind
STIM1_HUMAN	Q13586	660	S	2	A	d	isl
STIM1_HUMAN	Q13586	567	S	2	A	d	ind
STIM1_HUMAN	Q13586	512	S	2	A	d	isl
STIM1_HUMAN	Q13586	665	T	2	A	d	isl
STIM1_HUMAN	Q13586	667	S	1	O	d	isl
STIM1_HUMAN	Q13586	668	S	4	P	d	isl
STIM1_HUMAN	Q13586	575	S	4	P	d	ind
STIM1_HUMAN	Q13586	608	S	4	P	d	ind
ATF2_HUMAN	P15336	290	T	1	A	d	ind
ATF2_HUMAN	P15336	116	T	2	P	d	isl
ATF2_HUMAN	P15336	69	T	4	P	o	NA
ATF2_HUMAN	P15336	71	T	4	P	o	NA
ATF2_HUMAN	P15336	136	S	2	P	d	ind
ATF2_HUMAN	P15336	73	T	4	O	o	NA
ATF2_HUMAN	P15336	328	S	2	P	d	ind
ATF2_HUMAN	P15336	112	S	4	P	d	isl
ATF2_HUMAN	P15336	305	T	1	A	d	isl
ATF2_HUMAN	P15336	307	S	1	B	d	isl
ATF2_HUMAN	P15336	340	S	3	O	d	ind
ATF2_HUMAN	P15336	310	S	2	O	d	isl
ATF2_HUMAN	P15336	90	S	4	P	d	ind
ATF2_HUMAN	P15336	283	T	1	B	d	ind
ATF2_HUMAN	P15336	62	S	4	B	o	NA
PLLP_HUMAN	Q9Y342	9	S	2	O	d	ind
GRIP2_HUMAN	Q9C0E4	105	T	1	O	o	NA
GRIP2_HUMAN	Q9C0E4	98	S	1	O	o	NA
GRIP2_HUMAN	Q9C0E4	38	S	1	B	o	NA
GRIP2_HUMAN	Q9C0E4	114	T	1	O	o	NA
RBL2_HUMAN	Q08999	642	T	3	P	d	isl
RBL2_HUMAN	Q08999	1035	S	4	P	o	NA
RBL2_HUMAN	Q08999	1042	T	1	O	d	isl
RBL2_HUMAN	Q08999	659	S	3	O	d	isl
RBL2_HUMAN	Q08999	1044	S	3	P	d	isl
RBL2_HUMAN	Q08999	661	T	1	B	d	isl
RBL2_HUMAN	Q08999	662	S	4	P	d	isl
RBL2_HUMAN	Q08999	413	S	4	P	o	NA
RBL2_HUMAN	Q08999	670	Y	1	Y	d	isl
RBL2_HUMAN	Q08999	672	S	4	P	d	isl
RBL2_HUMAN	Q08999	417	T	3	P	o	NA
RBL2_HUMAN	Q08999	1059	S	1	P	d	ind
RBL2_HUMAN	Q08999	1068	S	4	P	d	ind
RBL2_HUMAN	Q08999	688	S	4	P	d	ind
RBL2_HUMAN	Q08999	948	S	3	O	d	isl
RBL2_HUMAN	Q08999	952	S	4	P	d	isl
RBL2_HUMAN	Q08999	962	S	3	A	d	isl
RBL2_HUMAN	Q08999	966	S	3	P	d	isl
RBL2_HUMAN	Q08999	1097	T	3	P	d	ind
RBL2_HUMAN	Q08999	971	S	3	O	d	isl
RBL2_HUMAN	Q08999	982	S	4	O	d	isl
RBL2_HUMAN	Q08999	1112	S	4	P	d	ind
RBL2_HUMAN	Q08999	986	T	3	P	d	isl
RBL2_HUMAN	Q08999	995	S	1	A	d	isl
RBL2_HUMAN	Q08999	1138	S	1	O	d	ind
RBL2_HUMAN	Q08999	639	S	4	P	d	isl
ZN217_HUMAN	O75362	869	S	1	O	d	ind
ZN217_HUMAN	O75362	494	T	1	B	o	NA
ZN217_HUMAN	O75362	593	S	2	P	d	ind
ZN217_HUMAN	O75362	409	T	1	O	d	isl
ZN217_HUMAN	O75362	407	S	2	P	d	isl
ZN217_HUMAN	O75362	441	S	1	A	d	isl
ZN217_HUMAN	O75362	445	S	1	A	d	isl
CNN3_HUMAN	Q15417	162	S	1	B	o	NA
CNN3_HUMAN	Q15417	293	S	3	A	d	isl
CNN3_HUMAN	Q15417	296	S	3	A	d	isl
CNN3_HUMAN	Q15417	322	Y	1	Y	d	isl
CNN3_HUMAN	Q15417	300	Y	1	Y	d	isl
CNN3_HUMAN	Q15417	175	S	1	B	o	NA
CNN3_HUMAN	Q15417	182	Y	1	Y	o	NA
CNN3_HUMAN	Q15417	184	T	1	O	d	ind
CNN3_HUMAN	Q15417	261	Y	2	Y	o	NA
CNN3_HUMAN	Q15417	316	Y	1	Y	d	isl
CNN3_HUMAN	Q15417	254	S	1	B	d	ind
CNN3_HUMAN	Q15417	320	Y	1	Y	d	isl
NR4A2_HUMAN	P43354	129	T	1	P	d	isl
NR4A2_HUMAN	P43354	132	T	3	P	d	isl
NR4A2_HUMAN	P43354	181	S	2	P	d	ind
NR4A2_HUMAN	P43354	126	S	3	P	d	isl
NR4A2_HUMAN	P43354	359	S	2	P	d	ind
CUED1_HUMAN	Q9NWM3	9	S	1	B	d	isl
CUED1_HUMAN	Q9NWM3	12	S	1	B	d	isl
CUED1_HUMAN	Q9NWM3	230	Y	1	Y	d	ind
TET2_HUMAN	Q6N021	99	S	2	B	d	ind
TET2_HUMAN	Q6N021	38	S	1	P	d	ind
TET2_HUMAN	Q6N021	15	S	1	P	d	ind
ZBT32_HUMAN	Q9Y2Y4	396	T	1	B	d	ind
DNLI4_HUMAN	P49917	650	T	3	O	o	NA
DNLI1_HUMAN	P18858	66	S	4	A	d	ind
DNLI1_HUMAN	P18858	195	T	2	P	d	isl
DNLI1_HUMAN	P18858	197	T	2	A	d	isl
DNLI1_HUMAN	P18858	49	S	2	A	d	isl
DNLI1_HUMAN	P18858	233	T	2	P	d	ind
DNLI1_HUMAN	P18858	913	S	2	A	d	isl
DNLI1_HUMAN	P18858	51	S	4	P	d	isl
DNLI1_HUMAN	P18858	918	T	1	O	d	isl
DNLI1_HUMAN	P18858	919	Y	1	Y	d	isl
DNLI1_HUMAN	P18858	91	S	3	P	d	ind
DNLI1_HUMAN	P18858	190	T	1	B	d	isl
DDX3X_HUMAN	O00571	131	S	2	A	d	ind
DDX3X_HUMAN	O00571	82	S	2	B	d	isl
DDX3X_HUMAN	O00571	520	S	1	A	o	NA
DDX3X_HUMAN	O00571	429	S	1	B	o	NA
DDX3X_HUMAN	O00571	410	S	1	B	o	NA
DDX3X_HUMAN	O00571	283	Y	1	Y	o	NA
DDX3X_HUMAN	O00571	301	Y	1	Y	o	NA
DDX3X_HUMAN	O00571	53	Y	1	Y	d	isl
DDX3X_HUMAN	O00571	62	S	1	A	d	isl
DDX3X_HUMAN	O00571	323	T	4	P	o	NA
DDX3X_HUMAN	O00571	69	Y	2	Y	d	isl
DDX3X_HUMAN	O00571	70	S	1	B	d	isl
DDX3X_HUMAN	O00571	71	S	1	O	d	isl
DDX3X_HUMAN	O00571	456	S	1	A	o	NA
DDX3X_HUMAN	O00571	74	S	2	A	d	isl
DDX3X_HUMAN	O00571	462	Y	1	Y	o	NA
DDX3X_HUMAN	O00571	594	S	2	B	d	isl
DDX3X_HUMAN	O00571	83	S	1	B	d	isl
DDX3X_HUMAN	O00571	90	S	2	O	d	isl
DDX3X_HUMAN	O00571	92	S	1	O	d	isl
DDX3X_HUMAN	O00571	605	S	2	B	d	isl
DDX3X_HUMAN	O00571	606	S	1	B	d	isl
DDX3X_HUMAN	O00571	612	S	2	O	d	isl
DDX3X_HUMAN	O00571	466	Y	1	Y	o	NA
DDX3X_HUMAN	O00571	104	Y	2	Y	d	ind
DDX3X_HUMAN	O00571	114	S	1	B	d	ind
DDX3X_HUMAN	O00571	243	Y	1	Y	o	NA
ZMYM2_HUMAN	Q9UBW7	1060	S	1	A	d	isl
ZMYM2_HUMAN	Q9UBW7	1061	S	1	A	d	isl
ZMYM2_HUMAN	Q9UBW7	838	S	2	P	d	ind
ZMYM2_HUMAN	Q9UBW7	1064	S	1	A	d	isl
ZMYM2_HUMAN	Q9UBW7	683	Y	2	Y	o	NA
ZMYM2_HUMAN	Q9UBW7	680	Y	2	Y	o	NA
ZMYM2_HUMAN	Q9UBW7	303	S	2	O	d	isl
ZMYM2_HUMAN	Q9UBW7	624	S	1	P	d	ind
ZMYM2_HUMAN	Q9UBW7	305	S	4	P	d	isl
ZMYM2_HUMAN	Q9UBW7	595	Y	2	Y	o	NA
ZMYM2_HUMAN	Q9UBW7	309	S	2	O	d	isl
ZMYM2_HUMAN	Q9UBW7	729	Y	2	Y	o	NA
ZMYM2_HUMAN	Q9UBW7	1056	S	1	A	d	isl
ZMYM2_HUMAN	Q9UBW7	862	Y	1	Y	d	ind
ZMYM2_HUMAN	Q9UBW7	1376	T	2	A	d	ind
SYTL3_HUMAN	Q4VX76	243	S	1	B	d	ind
TRPM4_HUMAN	Q8TD43	97	T	1	A	o	NA
TRPM4_HUMAN	Q8TD43	1103	S	1	P	d	ind
DLGP4_HUMAN	Q9Y2H0	609	S	1	A	d	isl
DLGP4_HUMAN	Q9Y2H0	611	S	1	A	d	isl
DLGP4_HUMAN	Q9Y2H0	709	S	1	O	d	isl
DLGP4_HUMAN	Q9Y2H0	710	S	1	A	d	isl
DLGP4_HUMAN	Q9Y2H0	744	S	2	A	d	ind
DLGP4_HUMAN	Q9Y2H0	714	T	1	B	d	isl
DLGP4_HUMAN	Q9Y2H0	683	S	1	P	d	ind
DLGP4_HUMAN	Q9Y2H0	716	S	1	A	d	isl
DLGP4_HUMAN	Q9Y2H0	973	S	2	B	d	isl
DLGP4_HUMAN	Q9Y2H0	975	T	1	A	d	isl
DLGP4_HUMAN	Q9Y2H0	368	S	1	B	d	ind
DLGP4_HUMAN	Q9Y2H0	915	T	2	P	d	ind
DLGP4_HUMAN	Q9Y2H0	980	S	1	A	d	isl
DLGP4_HUMAN	Q9Y2H0	968	S	1	B	d	isl
DLGP4_HUMAN	Q9Y2H0	665	S	2	B	d	isl
DLGP4_HUMAN	Q9Y2H0	666	S	1	B	d	isl
DLGP4_HUMAN	Q9Y2H0	763	S	1	B	d	ind
DLGP4_HUMAN	Q9Y2H0	732	S	1	A	d	ind
NUDT7_HUMAN	P0C024	33	S	1	O	o	NA
ELMO1_HUMAN	Q92556	594	S	1	P	d	ind
ELMO1_HUMAN	Q92556	466	T	1	A	o	NA
ELMO1_HUMAN	Q92556	724	Y	3	Y	d	ind
ELMO1_HUMAN	Q92556	31	S	1	B	o	NA
ELMO1_HUMAN	Q92556	344	S	1	A	d	ind
ELMO1_HUMAN	Q92556	511	Y	4	Y	d	ind
CRNL1_HUMAN	Q9BZJ0	598	T	1	B	o	NA
CRNL1_HUMAN	Q9BZJ0	599	S	1	B	o	NA
FOXA2_HUMAN	Q9Y261	301	T	1	A	d	isl
FOXA2_HUMAN	Q9Y261	303	S	2	P	d	isl
FOXA2_HUMAN	Q9Y261	307	S	1	O	d	isl
FOXA2_HUMAN	Q9Y261	309	S	2	P	d	isl
FOXA2_HUMAN	Q9Y261	283	S	2	O	d	ind
FOXA2_HUMAN	Q9Y261	156	T	4	B	d	ind
FOXA2_HUMAN	Q9Y261	223	S	1	P	d	ind
PNPT1_HUMAN	Q8TCS8	59	S	1	B	o	NA
PNPT1_HUMAN	Q8TCS8	60	S	1	B	o	NA
S61A1_HUMAN	P61619	407	T	1	B	d	isl
S61A1_HUMAN	P61619	408	S	1	B	d	isl
S22A5_HUMAN	O76082	550	T	2	O	d	ind
ABCA2_HUMAN	Q9BZC7	1093	S	1	B	o	NA
ABCA2_HUMAN	Q9BZC7	2056	T	1	O	o	NA
ABCA2_HUMAN	Q9BZC7	2412	T	2	A	d	isl
ABCA2_HUMAN	Q9BZC7	1331	S	2	A	d	isl
ABCA2_HUMAN	Q9BZC7	1327	S	2	A	d	isl
ABCA2_HUMAN	Q9BZC7	2419	S	1	A	d	isl
EP300_HUMAN	Q09472	611	Y	1	Y	o	NA
EP300_HUMAN	Q09472	2309	S	1	P	d	ind
EP300_HUMAN	Q09472	2279	S	4	P	d	ind
EP300_HUMAN	Q09472	1834	S	4	B	d	ind
EP300_HUMAN	Q09472	2315	S	4	P	d	ind
EP300_HUMAN	Q09472	12	S	3	O	d	ind
EP300_HUMAN	Q09472	1037	S	2	O	d	isl
EP300_HUMAN	Q09472	1038	S	4	P	d	isl
EP300_HUMAN	Q09472	1726	S	2	P	d	ind
EP300_HUMAN	Q09472	499	S	1	P	d	ind
EP300_HUMAN	Q09472	887	T	2	P	d	ind
EP300_HUMAN	Q09472	2328	S	1	P	d	ind
EP300_HUMAN	Q09472	89	S	4	B	d	ind
EP300_HUMAN	Q09472	285	S	2	P	d	ind
EP300_HUMAN	Q09472	2366	S	4	P	d	ind
VP13A_HUMAN	Q96RL7	849	S	1	P	d	ind
MPP2_HUMAN	Q14168	552	T	1	A	o	NA
MPP2_HUMAN	Q14168	42	S	1	P	o	NA
MPP2_HUMAN	Q14168	139	Y	1	Y	d	isl
MPP2_HUMAN	Q14168	141	T	2	P	d	isl
MPP2_HUMAN	Q14168	145	S	1	P	d	isl
MPP2_HUMAN	Q14168	363	Y	1	Y	o	NA
MPP2_HUMAN	Q14168	151	T	1	O	d	isl
MPP2_HUMAN	Q14168	138	T	1	A	d	isl
MPP2_HUMAN	Q14168	446	Y	1	Y	o	NA
S14L3_HUMAN	Q9UDX4	9	S	1	P	d	ind
TCTP_HUMAN	P13693	9	S	3	A	o	NA
TCTP_HUMAN	P13693	53	S	4	A	d	isl
TCTP_HUMAN	P13693	46	S	4	O	d	isl
TCTP_HUMAN	P13693	15	S	3	A	o	NA
TCTP_HUMAN	P13693	64	S	3	O	d	isl
RS28_HUMAN	P62857	21	T	2	B	d	isl
RS28_HUMAN	P62857	23	S	2	B	d	isl
OBSCN_HUMAN	Q5VST9	5569	T	1	P	d	isl
OBSCN_HUMAN	Q5VST9	6817	S	1	P	d	isl
OBSCN_HUMAN	Q5VST9	5955	S	1	B	o	NA
OBSCN_HUMAN	Q5VST9	4805	S	1	A	d	ind
OBSCN_HUMAN	Q5VST9	136	S	1	P	d	ind
OBSCN_HUMAN	Q5VST9	7178	S	1	B	d	ind
OBSCN_HUMAN	Q5VST9	4750	S	1	B	d	isl
OBSCN_HUMAN	Q5VST9	238	S	1	P	d	ind
OBSCN_HUMAN	Q5VST9	4754	T	1	B	d	isl
OBSCN_HUMAN	Q5VST9	4787	S	1	A	d	isl
OBSCN_HUMAN	Q5VST9	4788	T	1	A	d	isl
OBSCN_HUMAN	Q5VST9	4757	S	1	A	d	isl
OBSCN_HUMAN	Q5VST9	4759	S	1	A	d	isl
OBSCN_HUMAN	Q5VST9	6808	S	1	B	d	isl
OBSCN_HUMAN	Q5VST9	5669	S	1	P	d	ind
OBSCN_HUMAN	Q5VST9	5563	S	1	A	d	isl
OBSCN_HUMAN	Q5VST9	6812	S	1	P	d	isl
OBSCN_HUMAN	Q5VST9	6773	S	1	P	d	ind
OBSCN_HUMAN	Q5VST9	6942	S	1	B	d	ind
TRAD1_HUMAN	O14545	479	S	1	O	d	ind
TRAD1_HUMAN	O14545	552	T	1	P	d	isl
TRAD1_HUMAN	O14545	558	Y	1	Y	d	isl
TRAD1_HUMAN	O14545	415	S	2	P	d	ind
TRAD1_HUMAN	O14545	278	S	2	A	d	ind
ZNT6_HUMAN	Q6NXT4	382	S	1	P	d	ind
PHKG2_HUMAN	P15735	324	S	1	O	o	NA
PHKG2_HUMAN	P15735	190	T	1	P	o	NA
SGSM1_HUMAN	Q2NKQ1	701	S	1	B	d	isl
SGSM1_HUMAN	Q2NKQ1	702	T	1	B	d	isl
CAC1I_HUMAN	Q9P0X4	1873	S	1	A	d	ind
EF2_HUMAN	P13639	325	S	1	B	d	ind
EF2_HUMAN	P13639	360	S	1	P	o	NA
EF2_HUMAN	P13639	399	S	2	O	o	NA
EF2_HUMAN	P13639	48	S	2	O	o	NA
EF2_HUMAN	P13639	434	Y	1	Y	o	NA
EF2_HUMAN	P13639	435	T	2	P	o	NA
EF2_HUMAN	P13639	500	S	3	B	o	NA
EF2_HUMAN	P13639	502	S	2	P	o	NA
EF2_HUMAN	P13639	57	T	4	A	d	isl
EF2_HUMAN	P13639	730	Y	1	Y	o	NA
EF2_HUMAN	P13639	59	T	4	A	d	isl
EF2_HUMAN	P13639	443	Y	2	Y	o	NA
EF2_HUMAN	P13639	411	Y	1	Y	o	NA
EF2_HUMAN	P13639	54	T	4	O	d	isl
IMPCT_HUMAN	Q9P2X3	297	S	1	P	d	ind
IMPCT_HUMAN	Q9P2X3	207	Y	1	Y	o	NA
WDR44_HUMAN	Q5JSH3	3	S	2	A	d	isl
WDR44_HUMAN	Q5JSH3	5	S	1	A	d	isl
WDR44_HUMAN	Q5JSH3	262	S	2	B	d	ind
WDR44_HUMAN	Q5JSH3	344	S	2	B	d	isl
WDR44_HUMAN	Q5JSH3	271	T	2	P	d	ind
WDR44_HUMAN	Q5JSH3	403	S	2	A	d	ind
WDR44_HUMAN	Q5JSH3	27	S	2	P	d	ind
WDR44_HUMAN	Q5JSH3	161	S	2	A	d	isl
WDR44_HUMAN	Q5JSH3	162	S	2	A	d	isl
WDR44_HUMAN	Q5JSH3	35	T	1	A	d	ind
WDR44_HUMAN	Q5JSH3	809	Y	1	Y	o	NA
WDR44_HUMAN	Q5JSH3	561	S	2	P	d	isl
WDR44_HUMAN	Q5JSH3	50	S	2	P	d	ind
WDR44_HUMAN	Q5JSH3	435	S	1	B	d	ind
WDR44_HUMAN	Q5JSH3	565	S	2	A	d	isl
WDR44_HUMAN	Q5JSH3	568	S	2	O	d	isl
WDR44_HUMAN	Q5JSH3	342	S	2	B	d	isl
WDR44_HUMAN	Q5JSH3	471	S	2	A	d	isl
WDR44_HUMAN	Q5JSH3	472	S	2	A	d	isl
WDR44_HUMAN	Q5JSH3	219	T	2	P	d	ind
WDR44_HUMAN	Q5JSH3	349	T	2	B	d	isl
WDR44_HUMAN	Q5JSH3	479	Y	1	Y	d	isl
WDR44_HUMAN	Q5JSH3	495	Y	1	Y	o	NA
WDR44_HUMAN	Q5JSH3	470	S	2	A	d	isl
UNC5A_HUMAN	Q6ZN44	401	S	1	P	d	ind
UNC5A_HUMAN	Q6ZN44	431	Y	1	Y	d	ind
COMA1_HUMAN	Q8NFW1	1035	S	1	P	d	isl
COMA1_HUMAN	Q8NFW1	1038	S	1	A	d	isl
T185A_HUMAN	Q8NFB2	333	S	2	P	d	ind
PAXX_HUMAN	Q9BUH6	145	T	1	O	d	isl
PAXX_HUMAN	Q9BUH6	148	S	2	P	d	isl
PCDAD_HUMAN	Q9Y5I0	893	S	1	P	d	ind
SCN2A_HUMAN	Q99250	1124	S	2	A	d	isl
SCN2A_HUMAN	Q99250	1893	Y	1	Y	d	ind
SCN2A_HUMAN	Q99250	1126	S	2	A	d	isl
SCN2A_HUMAN	Q99250	554	S	1	P	d	ind
SCN2A_HUMAN	Q99250	691	S	1	A	d	ind
SCN2A_HUMAN	Q99250	1971	S	1	P	d	ind
SCN2A_HUMAN	Q99250	1112	S	2	A	d	isl
SCN2A_HUMAN	Q99250	540	S	1	A	d	ind
SCRN1_HUMAN	Q12765	322	S	1	P	d	ind
SCRN1_HUMAN	Q12765	360	S	1	A	d	ind
NUDC1_HUMAN	Q96RS6	8	S	2	O	o	NA
PGM1_HUMAN	P36871	353	Y	1	Y	o	NA
PGM1_HUMAN	P36871	355	T	1	P	o	NA
PGM1_HUMAN	P36871	357	T	1	O	o	NA
PGM1_HUMAN	P36871	134	S	1	O	o	NA
PGM1_HUMAN	P36871	521	Y	1	Y	o	NA
PGM1_HUMAN	P36871	509	S	2	O	o	NA
PGM1_HUMAN	P36871	19	T	1	B	d	ind
PGM1_HUMAN	P36871	369	S	1	O	o	NA
PGM1_HUMAN	P36871	115	T	2	O	o	NA
PGM1_HUMAN	P36871	117	S	4	O	o	NA
PGM1_HUMAN	P36871	408	S	1	B	o	NA
PGM1_HUMAN	P36871	505	S	2	B	o	NA
PGM1_HUMAN	P36871	378	S	2	O	d	ind
PGM1_HUMAN	P36871	507	T	1	O	o	NA
PGM1_HUMAN	P36871	541	S	1	O	o	NA
CAPSL_HUMAN	Q8WWF8	170	Y	1	Y	d	ind
CO5A1_HUMAN	P20908	567	T	2	O	d	ind
LIN52_HUMAN	Q52LA3	28	S	4	P	d	ind
LIN52_HUMAN	Q52LA3	7	S	1	P	d	ind
RLA1_HUMAN	P05386	101	S	4	A	d	isl
RLA1_HUMAN	P05386	104	S	2	A	d	isl
LAT3_HUMAN	O75387	251	Y	1	Y	o	NA
LAT3_HUMAN	O75387	267	S	2	B	d	isl
LAT3_HUMAN	O75387	262	S	2	O	d	isl
2A5G_HUMAN	Q13362	385	T	1	B	o	NA
2A5G_HUMAN	Q13362	497	S	1	B	d	ind
NHSL2_HUMAN	Q5HYW2	643	S	1	B	d	isl
NHSL2_HUMAN	Q5HYW2	132	S	1	B	d	isl
NHSL2_HUMAN	Q5HYW2	325	S	1	A	d	ind
NHSL2_HUMAN	Q5HYW2	134	S	1	B	d	isl
NHSL2_HUMAN	Q5HYW2	320	T	1	P	d	ind
NHSL2_HUMAN	Q5HYW2	210	S	1	B	d	ind
NHSL2_HUMAN	Q5HYW2	435	S	1	B	d	ind
NHSL2_HUMAN	Q5HYW2	469	S	1	B	d	isl
NHSL2_HUMAN	Q5HYW2	471	S	1	B	d	isl
NHSL2_HUMAN	Q5HYW2	473	S	1	A	d	isl
NHSL2_HUMAN	Q5HYW2	192	S	1	B	d	ind
NHSL2_HUMAN	Q5HYW2	646	Y	1	Y	d	isl
RS8_HUMAN	P62241	130	T	2	P	d	ind
RS8_HUMAN	P62241	83	Y	1	Y	o	NA
RS8_HUMAN	P62241	160	S	2	B	d	ind
CASC4_HUMAN	Q6P4E1	366	S	2	P	d	ind
GDIR2_HUMAN	P52566	145	S	2	O	o	NA
GDIR2_HUMAN	P52566	130	Y	1	Y	o	NA
GDIR2_HUMAN	P52566	20	S	1	O	d	isl
GDIR2_HUMAN	P52566	24	Y	4	Y	d	isl
ZN580_HUMAN	Q9UK33	15	S	2	P	d	ind
ZN580_HUMAN	Q9UK33	103	S	1	P	d	ind
TAF9_HUMAN	Q16594	161	T	2	O	d	isl
TAF9_HUMAN	Q16594	164	T	1	P	d	isl
TAF9_HUMAN	Q16594	169	T	1	O	d	isl
TAF9_HUMAN	Q16594	178	T	2	P	d	isl
TAF9_HUMAN	Q16594	149	S	2	O	d	isl
TAF9_HUMAN	Q16594	152	S	2	O	d	isl
TAF9_HUMAN	Q16594	155	S	2	O	d	isl
TAF9_HUMAN	Q16594	158	S	2	O	d	isl
TAF9_HUMAN	Q16594	159	T	2	P	d	isl
SSBP2_HUMAN	P81877	321	S	2	P	d	isl
SSBP2_HUMAN	P81877	333	T	2	P	d	isl
SSBP2_HUMAN	P81877	326	S	1	O	d	isl
ARI2_HUMAN	O95376	353	S	2	O	d	ind
MI4GD_HUMAN	A9UHW6	18	T	1	O	o	NA
MI4GD_HUMAN	A9UHW6	221	S	1	A	d	ind
RTKN_HUMAN	Q9BST9	518	T	2	B	d	isl
RTKN_HUMAN	Q9BST9	520	S	2	B	d	isl
RTKN_HUMAN	Q9BST9	106	S	2	B	d	isl
RTKN_HUMAN	Q9BST9	108	S	1	B	d	isl
RTKN_HUMAN	Q9BST9	115	S	1	P	d	isl
RTKN_HUMAN	Q9BST9	220	S	1	O	d	ind
RTKN_HUMAN	Q9BST9	543	S	2	P	d	ind
RTKN_HUMAN	Q9BST9	232	S	2	A	d	ind
MYO7B_HUMAN	Q6PIF6	1033	S	1	O	d	isl
MYO7B_HUMAN	Q6PIF6	1034	S	1	O	d	isl
MYO7B_HUMAN	Q6PIF6	1371	S	1	B	o	NA
MYO7B_HUMAN	Q6PIF6	904	S	1	B	o	NA
SC6A5_HUMAN	Q9Y345	57	T	1	O	d	isl
SC6A5_HUMAN	Q9Y345	84	S	1	P	d	ind
SC6A5_HUMAN	Q9Y345	56	S	1	B	d	isl
RNF14_HUMAN	Q9UBS8	451	S	1	P	o	NA
RNF14_HUMAN	Q9UBS8	348	S	2	P	o	NA
MIGA1_HUMAN	Q8NAN2	289	S	1	A	d	ind
MIGA1_HUMAN	Q8NAN2	147	S	1	B	d	ind
DDX59_HUMAN	Q5T1V6	160	S	2	P	d	ind
ARP10_HUMAN	Q9NZ32	377	Y	1	Y	d	ind
ARP10_HUMAN	Q9NZ32	4	Y	1	Y	d	ind
ARP10_HUMAN	Q9NZ32	414	S	2	B	d	isl
ARP10_HUMAN	Q9NZ32	415	T	2	A	d	isl
DYSF_HUMAN	O75923	185	T	1	P	d	isl
DYSF_HUMAN	O75923	191	S	1	B	d	isl
DYSF_HUMAN	O75923	1648	Y	1	Y	o	NA
PLAL2_HUMAN	Q9UPG8	273	S	1	P	d	ind
PLAL2_HUMAN	Q9UPG8	251	T	1	B	d	ind
PLAL2_HUMAN	Q9UPG8	381	S	1	P	d	ind
SNX13_HUMAN	Q9Y5W8	523	S	1	B	d	ind
SNX13_HUMAN	Q9Y5W8	614	S	1	B	o	NA
RAP1B_HUMAN	P61224	179	S	4	B	d	ind
RAP1B_HUMAN	P61224	39	S	1	O	o	NA
RAP1B_HUMAN	P61224	159	Y	1	Y	o	NA
PECA1_HUMAN	P16284	713	Y	4	Y	d	isl
PECA1_HUMAN	P16284	690	Y	4	Y	d	ind
PECA1_HUMAN	P16284	714	S	1	A	d	isl
PECA1_HUMAN	P16284	729	S	1	A	d	isl
PECA1_HUMAN	P16284	728	Y	1	Y	d	isl
CC124_HUMAN	Q96CT7	122	S	1	B	d	ind
CC124_HUMAN	Q96CT7	141	S	2	A	d	ind
CC124_HUMAN	Q96CT7	38	Y	2	Y	d	ind
CC124_HUMAN	Q96CT7	194	S	2	O	d	ind
CAC1D_HUMAN	Q01668	849	S	1	B	d	ind
CAC1D_HUMAN	Q01668	1700	S	2	B	d	ind
CAC1D_HUMAN	Q01668	1865	Y	1	Y	d	ind
CAC1D_HUMAN	Q01668	45	S	1	O	d	ind
CAC1D_HUMAN	Q01668	2123	S	1	O	d	ind
CAC1D_HUMAN	Q01668	1773	S	2	B	d	ind
CAC1D_HUMAN	Q01668	1809	T	1	B	d	ind
CAC1D_HUMAN	Q01668	1490	S	1	B	o	NA
DHRS1_HUMAN	Q96LJ7	133	Y	1	Y	o	NA
CBX5_HUMAN	P45973	97	S	2	A	d	isl
CBX5_HUMAN	P45973	132	S	1	A	o	NA
CBX5_HUMAN	P45973	8	T	2	A	d	isl
CBX5_HUMAN	P45973	11	S	4	B	d	isl
CBX5_HUMAN	P45973	12	S	4	A	d	isl
CBX5_HUMAN	P45973	13	S	4	A	d	isl
CBX5_HUMAN	P45973	14	S	4	A	d	isl
CBX5_HUMAN	P45973	110	S	2	B	d	isl
CBX5_HUMAN	P45973	20	Y	1	Y	d	isl
CBX5_HUMAN	P45973	92	S	2	B	d	isl
CBX5_HUMAN	P45973	95	S	4	B	d	isl
F122A_HUMAN	Q96E09	262	S	2	O	d	isl
F122A_HUMAN	Q96E09	263	T	2	B	d	isl
F122A_HUMAN	Q96E09	265	T	1	A	d	isl
F122A_HUMAN	Q96E09	45	S	2	A	d	isl
F122A_HUMAN	Q96E09	267	S	2	P	d	isl
F122A_HUMAN	Q96E09	270	S	2	P	d	isl
F122A_HUMAN	Q96E09	143	S	2	P	d	isl
F122A_HUMAN	Q96E09	147	S	2	P	d	isl
F122A_HUMAN	Q96E09	276	S	2	P	d	isl
F122A_HUMAN	Q96E09	149	T	2	O	d	isl
F122A_HUMAN	Q96E09	35	S	2	B	d	isl
F122A_HUMAN	Q96E09	37	S	2	B	d	isl
F122A_HUMAN	Q96E09	173	S	1	P	d	isl
F122A_HUMAN	Q96E09	48	S	2	P	d	isl
F122A_HUMAN	Q96E09	177	S	1	P	d	isl
F122A_HUMAN	Q96E09	180	T	1	O	d	isl
F122A_HUMAN	Q96E09	187	S	2	B	d	isl
F122A_HUMAN	Q96E09	189	S	2	P	d	isl
F122A_HUMAN	Q96E09	62	S	2	B	d	isl
F122A_HUMAN	Q96E09	63	T	1	B	d	isl
F122A_HUMAN	Q96E09	64	T	1	B	d	isl
F122A_HUMAN	Q96E09	76	S	2	P	d	isl
F122A_HUMAN	Q96E09	82	S	1	B	d	isl
F122A_HUMAN	Q96E09	19	S	2	P	d	isl
SEM4G_HUMAN	Q9NTN9	713	S	1	B	d	ind
SEM4G_HUMAN	Q9NTN9	723	S	1	O	d	ind
SEM4G_HUMAN	Q9NTN9	795	S	2	B	d	ind
RSRP1_HUMAN	Q9BUV0	12	S	1	P	d	ind
RSRP1_HUMAN	Q9BUV0	109	S	1	B	d	ind
RSRP1_HUMAN	Q9BUV0	78	S	1	B	d	isl
RSRP1_HUMAN	Q9BUV0	80	S	1	B	d	isl
RSRP1_HUMAN	Q9BUV0	82	S	1	B	d	isl
RSRP1_HUMAN	Q9BUV0	84	S	1	B	d	isl
ANDR_HUMAN	P10275	651	S	4	P	d	ind
ANDR_HUMAN	P10275	16	S	3	B	d	ind
ANDR_HUMAN	P10275	96	S	2	P	d	ind
RTF1_HUMAN	Q92541	313	S	2	A	d	ind
RTF1_HUMAN	Q92541	53	S	2	A	d	isl
RTF1_HUMAN	Q92541	55	T	2	A	d	isl
RTF1_HUMAN	Q92541	697	S	2	B	d	ind
RTF1_HUMAN	Q92541	58	S	2	A	d	isl
RTF1_HUMAN	Q92541	60	S	2	A	d	isl
WFS1_HUMAN	O76024	235	S	1	B	d	isl
WFS1_HUMAN	O76024	236	S	1	A	d	isl
WFS1_HUMAN	O76024	238	S	1	O	o	NA
WFS1_HUMAN	O76024	799	T	1	A	d	ind
WFS1_HUMAN	O76024	32	S	2	A	d	ind
PIBF1_HUMAN	Q8WXW3	592	S	1	B	d	ind
NAA30_HUMAN	Q147X3	196	S	2	O	d	isl
NAA30_HUMAN	Q147X3	39	S	2	A	d	ind
NAA30_HUMAN	Q147X3	55	S	2	P	d	ind
NAA30_HUMAN	Q147X3	190	S	2	O	d	isl
NOP14_HUMAN	P78316	146	S	2	A	d	isl
NOP14_HUMAN	P78316	148	S	2	A	d	isl
NOP14_HUMAN	P78316	96	S	2	P	d	ind
NELFB_HUMAN	Q8WX92	564	T	1	P	d	isl
NELFB_HUMAN	Q8WX92	557	S	2	P	d	isl
AXIN2_HUMAN	Q9Y2T1	244	S	1	P	o	NA
STX7_HUMAN	O15400	129	S	2	B	d	isl
STX7_HUMAN	O15400	136	S	1	A	d	isl
STX7_HUMAN	O15400	41	T	1	P	d	isl
STX7_HUMAN	O15400	45	S	2	P	d	isl
STX7_HUMAN	O15400	75	S	2	O	d	isl
STX7_HUMAN	O15400	205	S	2	A	o	NA
STX7_HUMAN	O15400	78	T	2	O	d	isl
STX7_HUMAN	O15400	79	T	1	P	d	isl
STX7_HUMAN	O15400	144	S	1	A	d	isl
STX7_HUMAN	O15400	81	S	1	A	d	isl
STX7_HUMAN	O15400	149	T	1	O	d	isl
STX7_HUMAN	O15400	125	S	1	B	d	isl
STX7_HUMAN	O15400	126	S	2	B	d	isl
PI5PA_HUMAN	Q15735	886	S	1	B	d	isl
PI5PA_HUMAN	Q15735	694	S	1	P	d	ind
PI5PA_HUMAN	Q15735	888	S	1	P	d	isl
SCN4A_HUMAN	P35499	231	T	1	B	o	NA
CARD9_HUMAN	Q9H257	2	S	1	A	d	ind
CARD9_HUMAN	Q9H257	231	T	3	B	d	ind
CARD9_HUMAN	Q9H257	450	S	1	A	d	ind
CARD9_HUMAN	Q9H257	425	S	2	A	d	isl
CARD9_HUMAN	Q9H257	460	S	2	P	d	ind
CARD9_HUMAN	Q9H257	431	S	1	P	d	isl
CARD9_HUMAN	Q9H257	498	S	2	A	d	ind
CARD9_HUMAN	Q9H257	531	T	3	A	d	isl
CARD9_HUMAN	Q9H257	533	T	3	A	d	isl
CARD9_HUMAN	Q9H257	152	S	1	B	d	ind
CARD9_HUMAN	Q9H257	95	T	1	B	o	NA
LXN_HUMAN	Q9BS40	41	S	1	B	d	ind
RL13_HUMAN	P26373	106	S	2	B	d	isl
RL13_HUMAN	P26373	107	T	1	A	d	isl
RL13_HUMAN	P26373	140	S	1	A	d	ind
RL13_HUMAN	P26373	77	S	2	B	o	NA
RL13_HUMAN	P26373	109	S	1	B	d	isl
RL13_HUMAN	P26373	52	S	2	B	d	ind
MED29_HUMAN	Q9NX70	199	T	1	O	d	ind
MED29_HUMAN	Q9NX70	176	T	1	O	o	NA
TNR6B_HUMAN	Q9UPQ9	1432	S	1	P	o	NA
TNR6B_HUMAN	Q9UPQ9	1832	S	2	O	d	ind
TNR6B_HUMAN	Q9UPQ9	1464	T	1	O	d	isl
TNR6B_HUMAN	Q9UPQ9	879	S	2	P	d	ind
TNR6B_HUMAN	Q9UPQ9	1461	S	1	P	d	isl
TNR6B_HUMAN	Q9UPQ9	1816	S	2	P	d	ind
XRN2_HUMAN	Q9H0D6	485	S	1	P	d	isl
XRN2_HUMAN	Q9H0D6	678	S	2	B	o	NA
XRN2_HUMAN	Q9H0D6	487	S	2	P	d	isl
XRN2_HUMAN	Q9H0D6	471	S	2	P	d	isl
XRN2_HUMAN	Q9H0D6	499	S	2	A	d	isl
XRN2_HUMAN	Q9H0D6	501	S	2	A	d	isl
XRN2_HUMAN	Q9H0D6	470	S	2	O	d	isl
XRN2_HUMAN	Q9H0D6	439	T	4	P	d	isl
XRN2_HUMAN	Q9H0D6	473	S	2	O	d	isl
XRN2_HUMAN	Q9H0D6	475	S	2	P	d	isl
XRN2_HUMAN	Q9H0D6	445	S	2	O	d	isl
XRN2_HUMAN	Q9H0D6	478	T	1	O	d	isl
XRN2_HUMAN	Q9H0D6	479	S	1	O	d	isl
XRN2_HUMAN	Q9H0D6	448	S	2	P	d	isl
ZKSC7_HUMAN	Q9P0L1	602	T	1	B	d	ind
ZKSC7_HUMAN	Q9P0L1	686	T	1	B	d	ind
ZKSC7_HUMAN	Q9P0L1	714	T	1	B	d	ind
CKAP2_HUMAN	Q8WWK9	579	T	2	P	d	isl
CKAP2_HUMAN	Q8WWK9	597	T	2	P	o	NA
CKAP2_HUMAN	Q8WWK9	614	S	2	O	d	ind
CKAP2_HUMAN	Q8WWK9	623	T	4	P	d	ind
CKAP2_HUMAN	Q8WWK9	582	T	2	A	d	isl
ASAP2_HUMAN	O43150	293	Y	1	Y	d	ind
ASAP2_HUMAN	O43150	701	S	2	A	d	ind
ASAP2_HUMAN	O43150	712	S	1	P	d	ind
PK3C3_HUMAN	Q8NEB9	163	T	1	B	d	isl
PK3C3_HUMAN	Q8NEB9	164	S	1	B	d	isl
PK3C3_HUMAN	Q8NEB9	165	S	1	B	d	isl
PK3C3_HUMAN	Q8NEB9	231	Y	1	Y	o	NA
PK3C3_HUMAN	Q8NEB9	168	S	1	A	d	isl
PK3C3_HUMAN	Q8NEB9	276	S	1	B	d	ind
PK3C3_HUMAN	Q8NEB9	244	S	2	P	d	ind
PK3C3_HUMAN	Q8NEB9	159	T	3	P	d	isl
PK3C3_HUMAN	Q8NEB9	310	Y	1	Y	o	NA
K2C4_HUMAN	P19013	34	S	1	O	d	ind
K2C4_HUMAN	P19013	19	S	1	O	d	ind
K2C4_HUMAN	P19013	164	S	1	B	o	NA
K2C4_HUMAN	P19013	51	S	1	O	d	ind
EVI5_HUMAN	O60447	113	S	1	B	d	isl
EVI5_HUMAN	O60447	102	S	2	O	d	isl
EVI5_HUMAN	O60447	776	S	2	A	d	isl
EVI5_HUMAN	O60447	105	S	1	B	d	isl
EVI5_HUMAN	O60447	778	S	2	A	d	isl
EVI5_HUMAN	O60447	689	S	2	B	d	ind
TIAR_HUMAN	Q01085	226	S	1	P	o	NA
UBP20_HUMAN	Q9Y2K6	132	S	2	A	d	isl
UBP20_HUMAN	Q9Y2K6	134	S	2	A	d	isl
UBP20_HUMAN	Q9Y2K6	263	S	2	A	d	ind
UBP20_HUMAN	Q9Y2K6	394	S	1	P	d	isl
UBP20_HUMAN	Q9Y2K6	333	S	3	B	d	ind
UBP20_HUMAN	Q9Y2K6	112	S	2	P	d	ind
UBP20_HUMAN	Q9Y2K6	341	S	1	B	d	ind
UBP20_HUMAN	Q9Y2K6	406	S	2	O	d	isl
UBP20_HUMAN	Q9Y2K6	408	S	2	P	d	isl
UBP20_HUMAN	Q9Y2K6	377	T	2	P	d	isl
UBP20_HUMAN	Q9Y2K6	373	S	2	P	d	isl
UBP20_HUMAN	Q9Y2K6	368	S	1	P	d	isl
UBP20_HUMAN	Q9Y2K6	413	S	2	P	d	isl
UBP20_HUMAN	Q9Y2K6	103	S	1	O	d	ind
ATGA1_HUMAN	Q9BSB4	164	Y	1	Y	o	NA
KINH_HUMAN	P33176	516	Y	1	Y	d	ind
KINH_HUMAN	P33176	933	S	2	P	d	isl
KINH_HUMAN	P33176	935	T	2	O	d	isl
KINH_HUMAN	P33176	175	S	1	P	o	NA
KINH_HUMAN	P33176	819	S	1	A	d	ind
KINH_HUMAN	P33176	154	S	1	A	d	ind
NCKX2_HUMAN	Q9UI40	370	Y	1	Y	o	NA
BRAT1_HUMAN	Q6PJG6	745	T	1	O	d	isl
BRAT1_HUMAN	Q6PJG6	742	S	2	P	d	isl
VDAC2_HUMAN	P45880	68	T	1	A	d	ind
VDAC2_HUMAN	P45880	261	T	1	O	o	NA
VDAC2_HUMAN	P45880	206	Y	1	Y	o	NA
VDAC2_HUMAN	P45880	112	T	1	O	o	NA
VDAC2_HUMAN	P45880	113	T	1	O	o	NA
VDAC2_HUMAN	P45880	115	S	2	P	d	isl
VDAC2_HUMAN	P45880	118	T	1	O	d	isl
VDAC2_HUMAN	P45880	251	S	1	O	o	NA
DCA12_HUMAN	Q5T6F0	15	S	2	P	d	ind
RS14_HUMAN	P62263	72	Y	1	Y	o	NA
RS14_HUMAN	P62263	137	S	2	A	d	isl
RS14_HUMAN	P62263	107	T	2	P	d	isl
RS14_HUMAN	P62263	140	T	2	O	d	isl
RS14_HUMAN	P62263	114	S	1	O	d	isl
RS14_HUMAN	P62263	139	S	2	O	d	isl
CCND2_HUMAN	P30279	282	T	1	A	d	isl
CCND2_HUMAN	P30279	280	T	4	P	d	isl
CIC_HUMAN	Q96RK0	1409	S	4	P	d	isl
CIC_HUMAN	Q96RK0	1173	S	1	P	d	ind
CIC_HUMAN	Q96RK0	902	S	2	B	d	isl
CIC_HUMAN	Q96RK0	904	S	2	P	d	isl
CIC_HUMAN	Q96RK0	173	S	4	B	d	isl
CIC_HUMAN	Q96RK0	1291	T	1	P	d	isl
CIC_HUMAN	Q96RK0	142	S	2	B	d	isl
CIC_HUMAN	Q96RK0	146	S	2	A	d	isl
CIC_HUMAN	Q96RK0	277	S	2	B	d	isl
CIC_HUMAN	Q96RK0	431	S	2	B	d	isl
CIC_HUMAN	Q96RK0	279	S	2	B	d	isl
CIC_HUMAN	Q96RK0	285	S	1	B	d	isl
CIC_HUMAN	Q96RK0	1318	T	1	P	d	ind
CIC_HUMAN	Q96RK0	349	S	1	O	d	ind
CIC_HUMAN	Q96RK0	171	T	2	B	d	isl
CIC_HUMAN	Q96RK0	301	S	2	B	d	isl
CIC_HUMAN	Q96RK0	175	S	1	B	d	isl
CIC_HUMAN	Q96RK0	435	T	1	A	d	isl
CIC_HUMAN	Q96RK0	436	S	2	A	d	isl
CIC_HUMAN	Q96RK0	191	S	1	P	d	ind
CIC_HUMAN	Q96RK0	1344	S	1	A	d	ind
CIC_HUMAN	Q96RK0	583	T	2	P	d	isl
CIC_HUMAN	Q96RK0	585	S	1	O	d	isl
CIC_HUMAN	Q96RK0	77	S	1	O	d	ind
CIC_HUMAN	Q96RK0	1245	S	1	O	d	isl
CIC_HUMAN	Q96RK0	1294	S	2	P	d	isl
CIC_HUMAN	Q96RK0	721	S	2	P	d	ind
CIC_HUMAN	Q96RK0	472	T	1	A	d	isl
CIC_HUMAN	Q96RK0	474	S	1	A	d	isl
CIC_HUMAN	Q96RK0	605	S	1	B	d	ind
CIC_HUMAN	Q96RK0	1246	S	2	P	d	isl
CIC_HUMAN	Q96RK0	1375	T	2	O	d	isl
CIC_HUMAN	Q96RK0	1402	S	2	A	d	isl
CIC_HUMAN	Q96RK0	1378	S	2	O	d	isl
CIC_HUMAN	Q96RK0	739	S	2	P	d	ind
CIC_HUMAN	Q96RK0	1382	S	2	P	d	isl
CIC_HUMAN	Q96RK0	105	S	1	P	d	ind
CIC_HUMAN	Q96RK0	1389	S	4	O	d	isl
CIC_HUMAN	Q96RK0	496	S	2	P	d	ind
CIC_HUMAN	Q96RK0	303	T	2	O	d	isl
CIC_HUMAN	Q96RK0	1397	S	2	B	d	isl
CIC_HUMAN	Q96RK0	1398	T	2	B	d	isl
CIC_HUMAN	Q96RK0	1373	S	2	P	d	isl
CIC_HUMAN	Q96RK0	1429	S	1	O	d	ind
CIC_HUMAN	Q96RK0	299	S	2	B	d	isl
CIC_HUMAN	Q96RK0	1150	S	1	P	d	ind
CIC_HUMAN	Q96RK0	1408	T	2	O	d	isl
HM13_HUMAN	Q8TCT9	367	S	2	O	d	ind
ZN142_HUMAN	P52746	1455	T	1	A	o	NA
LRC8A_HUMAN	Q8IWT6	193	S	1	A	d	ind
LRC8A_HUMAN	Q8IWT6	202	S	1	A	d	ind
LRC8A_HUMAN	Q8IWT6	217	S	2	B	d	ind
ATG4B_HUMAN	Q9Y4P1	34	S	1	B	o	NA
ATG4B_HUMAN	Q9Y4P1	383	S	4	A	d	isl
ATG4B_HUMAN	Q9Y4P1	392	S	4	O	d	isl
MCM9_HUMAN	Q9NXL9	898	S	1	B	d	ind
MCM9_HUMAN	Q9NXL9	1069	S	1	O	d	ind
MCM9_HUMAN	Q9NXL9	1088	S	1	P	d	ind
ADCY4_HUMAN	Q8NFM4	919	S	1	A	o	NA
SRP54_HUMAN	P61011	21	T	1	O	o	NA
C2C2L_HUMAN	O14523	388	T	1	P	d	ind
C2C2L_HUMAN	O14523	660	S	2	O	d	isl
C2C2L_HUMAN	O14523	662	S	2	A	d	isl
C2C2L_HUMAN	O14523	411	S	2	P	d	isl
C2C2L_HUMAN	O14523	672	T	1	P	d	isl
C2C2L_HUMAN	O14523	417	T	2	P	d	isl
C2C2L_HUMAN	O14523	674	S	2	O	d	isl
C2C2L_HUMAN	O14523	420	S	2	O	d	isl
C2C2L_HUMAN	O14523	421	S	1	O	d	isl
C2C2L_HUMAN	O14523	422	T	1	P	d	isl
C2C2L_HUMAN	O14523	426	S	1	O	d	isl
C2C2L_HUMAN	O14523	428	T	2	P	d	isl
C2C2L_HUMAN	O14523	430	T	2	O	d	isl
C2C2L_HUMAN	O14523	691	S	1	B	d	ind
C2C2L_HUMAN	O14523	59	S	2	A	d	isl
C2C2L_HUMAN	O14523	703	S	1	P	d	ind
C2C2L_HUMAN	O14523	68	S	1	O	d	isl
C2C2L_HUMAN	O14523	464	S	2	P	d	isl
C2C2L_HUMAN	O14523	468	S	2	P	d	isl
C2C2L_HUMAN	O14523	470	S	2	B	d	isl
C2C2L_HUMAN	O14523	475	T	1	A	d	isl
C2C2L_HUMAN	O14523	613	S	1	A	d	isl
C2C2L_HUMAN	O14523	358	S	1	B	d	ind
C2C2L_HUMAN	O14523	619	S	1	A	d	isl
C2C2L_HUMAN	O14523	621	T	1	O	d	isl
C2C2L_HUMAN	O14523	623	S	2	O	d	isl
C2C2L_HUMAN	O14523	374	S	2	P	d	ind
C2C2L_HUMAN	O14523	631	S	1	A	d	isl
C2C2L_HUMAN	O14523	638	S	2	B	d	isl
FZD3_HUMAN	Q9NPG1	588	S	1	O	d	ind
FZD3_HUMAN	Q9NPG1	542	T	1	P	d	ind
MP2K7_HUMAN	O14733	66	T	1	P	d	ind
MP2K7_HUMAN	O14733	275	T	4	B	d	isl
MP2K7_HUMAN	O14733	271	S	4	O	d	isl
AT10A_HUMAN	O60312	466	S	1	A	d	ind
CHMP7_HUMAN	Q8WUX9	232	S	2	P	o	NA
RIT1_HUMAN	Q92963	209	S	1	P	d	ind
ILDR1_HUMAN	Q86SU0	501	S	1	P	d	isl
ILDR1_HUMAN	Q86SU0	499	S	1	B	d	isl
ILDR1_HUMAN	Q86SU0	469	S	1	P	d	ind
MCM4_HUMAN	P33991	2	S	2	O	d	isl
MCM4_HUMAN	P33991	3	S	4	P	d	isl
MCM4_HUMAN	P33991	6	S	2	O	d	isl
MCM4_HUMAN	P33991	7	T	4	P	d	isl
MCM4_HUMAN	P33991	9	S	1	O	d	isl
MCM4_HUMAN	P33991	459	Y	1	Y	o	NA
MCM4_HUMAN	P33991	88	S	3	P	d	ind
MCM4_HUMAN	P33991	110	T	4	P	d	isl
MCM4_HUMAN	P33991	464	S	1	B	o	NA
MCM4_HUMAN	P33991	105	S	2	O	d	isl
MCM4_HUMAN	P33991	19	T	4	P	d	isl
MCM4_HUMAN	P33991	406	S	2	B	o	NA
MCM4_HUMAN	P33991	120	S	2	O	d	isl
MCM4_HUMAN	P33991	26	S	2	A	d	isl
MCM4_HUMAN	P33991	32	S	4	P	d	isl
MCM4_HUMAN	P33991	131	S	2	A	d	isl
MCM4_HUMAN	P33991	54	S	4	P	d	ind
RED2_HUMAN	Q9NS39	696	Y	1	Y	o	NA
MFF_HUMAN	Q9GZY8	258	S	1	B	d	ind
MFF_HUMAN	Q9GZY8	200	T	2	P	d	isl
MFF_HUMAN	Q9GZY8	106	T	1	P	d	ind
MFF_HUMAN	Q9GZY8	172	S	4	B	d	ind
MFF_HUMAN	Q9GZY8	115	T	2	P	d	ind
MFF_HUMAN	Q9GZY8	202	S	2	P	d	isl
MFF_HUMAN	Q9GZY8	138	T	2	P	d	ind
MFF_HUMAN	Q9GZY8	155	S	4	B	d	isl
MFF_HUMAN	Q9GZY8	157	S	2	B	d	isl
RGS14_HUMAN	O43566	20	S	2	A	d	ind
RGS14_HUMAN	O43566	67	S	1	A	o	NA
RGS14_HUMAN	O43566	260	S	3	B	d	ind
RGS14_HUMAN	O43566	487	S	1	B	d	isl
RGS14_HUMAN	O43566	199	S	1	O	d	isl
RGS14_HUMAN	O43566	40	S	1	B	d	isl
RGS14_HUMAN	O43566	42	S	2	O	d	isl
RGS14_HUMAN	O43566	203	S	1	P	d	isl
RGS14_HUMAN	O43566	45	S	2	O	d	isl
RGS14_HUMAN	O43566	291	S	1	A	d	isl
RGS14_HUMAN	O43566	495	T	1	B	d	isl
RGS14_HUMAN	O43566	338	S	1	B	o	NA
RGS14_HUMAN	O43566	243	S	1	B	d	ind
RGS14_HUMAN	O43566	52	S	1	P	d	isl
RGS14_HUMAN	O43566	218	S	1	B	d	ind
RGS14_HUMAN	O43566	478	S	1	P	d	isl
RGS14_HUMAN	O43566	288	S	1	B	d	isl
HNRL2_HUMAN	Q1KMD3	161	S	2	A	d	isl
HNRL2_HUMAN	Q1KMD3	193	S	1	A	d	isl
HNRL2_HUMAN	Q1KMD3	228	S	2	P	d	isl
HNRL2_HUMAN	Q1KMD3	165	T	2	P	d	isl
HNRL2_HUMAN	Q1KMD3	743	Y	1	Y	d	ind
HNRL2_HUMAN	Q1KMD3	168	S	2	A	d	isl
HNRL2_HUMAN	Q1KMD3	188	S	2	O	d	isl
HNRL2_HUMAN	Q1KMD3	226	S	2	O	d	isl
HNRL2_HUMAN	Q1KMD3	655	S	2	B	d	ind
HNRL2_HUMAN	Q1KMD3	636	S	1	A	d	ind
HNRL2_HUMAN	Q1KMD3	244	T	1	O	d	ind
HNRL2_HUMAN	Q1KMD3	481	Y	1	Y	o	NA
HNRL2_HUMAN	Q1KMD3	185	S	2	A	d	isl
HNRL2_HUMAN	Q1KMD3	706	Y	1	Y	d	ind
HNRL2_HUMAN	Q1KMD3	604	Y	1	Y	d	ind
HNRL2_HUMAN	Q1KMD3	543	S	1	O	o	NA
HNRL2_HUMAN	Q1KMD3	224	S	1	O	d	isl
SR1IP_HUMAN	Q8N9Q2	145	S	2	B	d	isl
SR1IP_HUMAN	Q8N9Q2	153	S	1	O	d	isl
SR1IP_HUMAN	Q8N9Q2	100	T	1	A	d	ind
SR1IP_HUMAN	Q8N9Q2	150	S	0	A	d	isl
SR1IP_HUMAN	Q8N9Q2	144	S	2	B	d	isl
CDKL2_HUMAN	Q92772	15	Y	1	Y	o	NA
THOC1_HUMAN	Q96FV9	2	S	2	P	d	ind
THOC1_HUMAN	Q96FV9	560	S	2	P	d	ind
MITF_HUMAN	O75030	516	S	3	B	d	isl
MITF_HUMAN	O75030	357	S	1	A	o	NA
MITF_HUMAN	O75030	360	Y	1	Y	o	NA
MITF_HUMAN	O75030	491	S	2	P	d	isl
MITF_HUMAN	O75030	180	S	3	P	d	ind
MITF_HUMAN	O75030	405	S	3	O	o	NA
MITF_HUMAN	O75030	504	S	1	P	d	isl
MITF_HUMAN	O75030	409	S	4	O	o	NA
MITF_HUMAN	O75030	508	S	1	O	d	isl
MITF_HUMAN	O75030	414	S	4	P	o	NA
FOXA3_HUMAN	P55318	181	S	1	P	o	NA
CD97_HUMAN	P48960	825	T	2	O	d	isl
CD97_HUMAN	P48960	833	S	2	O	d	isl
CD97_HUMAN	P48960	831	S	2	A	d	isl
CPNE6_HUMAN	O95741	2	S	1	A	d	ind
DDR1_HUMAN	Q08345	513	Y	4	Y	d	isl
DDR1_HUMAN	Q08345	520	Y	3	Y	d	isl
DDR1_HUMAN	Q08345	796	Y	4	Y	o	NA
DDR1_HUMAN	Q08345	797	Y	4	Y	o	NA
DDR1_HUMAN	Q08345	792	Y	4	Y	o	NA
GPTC1_HUMAN	Q9BRR8	6	S	2	A	d	isl
GPTC1_HUMAN	Q9BRR8	8	S	2	A	d	isl
RPAC1_HUMAN	O15160	33	Y	2	Y	o	NA
ARG33_HUMAN	A8MVX0	268	T	1	B	o	NA
ARG33_HUMAN	A8MVX0	276	S	1	A	o	NA
ARG33_HUMAN	A8MVX0	285	S	1	O	o	NA
ARG33_HUMAN	A8MVX0	280	Y	1	Y	o	NA
FARP2_HUMAN	O94887	34	T	1	O	d	isl
FARP2_HUMAN	O94887	876	S	1	P	d	ind
FARP2_HUMAN	O94887	389	S	2	A	d	ind
FARP2_HUMAN	O94887	1033	S	1	B	d	ind
FARP2_HUMAN	O94887	428	S	1	A	d	ind
FARP2_HUMAN	O94887	402	S	1	O	d	ind
FARP2_HUMAN	O94887	340	S	1	B	d	isl
FARP2_HUMAN	O94887	22	T	1	P	o	NA
FARP2_HUMAN	O94887	344	S	1	O	d	isl
FARP2_HUMAN	O94887	28	T	1	A	d	isl
ADA17_HUMAN	P78536	770	S	1	A	d	isl
ADA17_HUMAN	P78536	785	S	1	O	d	isl
ADA17_HUMAN	P78536	819	S	3	B	d	ind
ADA17_HUMAN	P78536	767	S	1	A	d	isl
ADA17_HUMAN	P78536	791	S	4	A	d	isl
ADA17_HUMAN	P78536	761	T	2	B	d	isl
ADA17_HUMAN	P78536	735	T	4	P	d	ind
ADA17_HUMAN	P78536	768	T	1	A	d	isl
DDX6_HUMAN	P26196	313	Y	1	Y	o	NA
DDX6_HUMAN	P26196	312	Y	1	Y	o	NA
INADL_HUMAN	Q8NI35	1508	T	2	P	o	NA
INADL_HUMAN	Q8NI35	645	S	2	A	d	ind
INADL_HUMAN	Q8NI35	454	T	1	B	d	isl
INADL_HUMAN	Q8NI35	455	S	2	B	d	isl
INADL_HUMAN	Q8NI35	522	S	2	P	d	ind
INADL_HUMAN	Q8NI35	459	S	2	P	d	isl
INADL_HUMAN	Q8NI35	396	Y	1	Y	o	NA
INADL_HUMAN	Q8NI35	1555	S	1	B	o	NA
INADL_HUMAN	Q8NI35	1209	T	2	B	d	ind
ZN394_HUMAN	Q53GI3	520	T	1	B	o	NA
F208B_HUMAN	Q5VWN6	354	S	1	B	d	ind
F208B_HUMAN	Q5VWN6	675	S	1	P	d	ind
F208B_HUMAN	Q5VWN6	2037	S	2	P	d	ind
ZN664_HUMAN	Q8N3J9	138	T	1	B	d	ind
ZN664_HUMAN	Q8N3J9	110	T	1	B	o	NA
ZN664_HUMAN	Q8N3J9	222	T	1	B	d	ind
ZN664_HUMAN	Q8N3J9	166	T	1	B	d	ind
ZN664_HUMAN	Q8N3J9	194	T	1	B	d	ind
JIP3_HUMAN	Q9UPT6	676	S	1	P	d	ind
JIP3_HUMAN	Q9UPT6	1191	S	1	P	d	ind
JIP3_HUMAN	Q9UPT6	584	S	1	O	d	isl
JIP3_HUMAN	Q9UPT6	265	T	4	P	d	ind
JIP3_HUMAN	Q9UPT6	362	T	1	B	d	isl
JIP3_HUMAN	Q9UPT6	364	S	4	B	d	isl
JIP3_HUMAN	Q9UPT6	365	S	4	P	d	isl
JIP3_HUMAN	Q9UPT6	286	T	4	P	d	ind
JIP3_HUMAN	Q9UPT6	585	S	2	P	d	isl
JIP3_HUMAN	Q9UPT6	275	T	4	P	d	ind
JIP3_HUMAN	Q9UPT6	148	S	1	A	d	ind
JIP3_HUMAN	Q9UPT6	1260	S	1	P	d	ind
JIP3_HUMAN	Q9UPT6	602	S	1	P	d	ind
JIP3_HUMAN	Q9UPT6	314	S	4	B	d	ind
PLMN_HUMAN	P00747	189	S	1	A	d	ind
NIT1_HUMAN	Q86X76	327	S	1	O	d	ind
L2HDH_HUMAN	Q9H9P8	440	S	1	P	d	ind
KLF3_HUMAN	P57682	99	S	1	O	d	isl
KLF3_HUMAN	P57682	100	S	1	O	d	isl
KLF3_HUMAN	P57682	101	S	4	P	d	isl
KLF3_HUMAN	P57682	71	S	4	P	d	isl
KLF3_HUMAN	P57682	107	Y	1	Y	d	isl
KLF3_HUMAN	P57682	108	S	2	P	d	isl
KLF3_HUMAN	P57682	78	S	2	P	d	isl
KLF3_HUMAN	P57682	111	S	4	P	d	isl
KLF3_HUMAN	P57682	96	S	1	O	d	isl
KLF3_HUMAN	P57682	216	S	2	P	d	ind
KLF3_HUMAN	P57682	250	S	4	P	d	ind
KLF3_HUMAN	P57682	92	S	4	P	d	isl
KLF3_HUMAN	P57682	285	T	1	B	d	ind
KLF3_HUMAN	P57682	224	S	2	P	d	ind
CC117_HUMAN	Q8IWD4	53	S	2	P	d	ind
GPSM1_HUMAN	Q86YR5	545	S	1	P	d	ind
GPSM1_HUMAN	Q86YR5	252	Y	1	Y	o	NA
GPSM1_HUMAN	Q86YR5	471	S	2	P	d	isl
GPSM1_HUMAN	Q86YR5	492	S	2	B	d	isl
GPSM1_HUMAN	Q86YR5	493	S	2	A	d	isl
GPSM1_HUMAN	Q86YR5	469	S	2	B	d	isl
GPSM1_HUMAN	Q86YR5	150	Y	1	Y	o	NA
GPSM1_HUMAN	Q86YR5	311	Y	1	Y	o	NA
GPSM1_HUMAN	Q86YR5	569	S	1	O	d	isl
GPSM1_HUMAN	Q86YR5	572	S	1	O	d	isl
GPSM1_HUMAN	Q86YR5	413	S	2	A	d	ind
IGF1R_HUMAN	P08069	1281	Y	4	Y	d	isl
IGF1R_HUMAN	P08069	1346	Y	3	Y	d	ind
IGF1R_HUMAN	P08069	1161	Y	4	Y	o	NA
IGF1R_HUMAN	P08069	973	Y	4	Y	o	NA
IGF1R_HUMAN	P08069	1163	T	1	A	o	NA
IGF1R_HUMAN	P08069	1165	Y	4	Y	o	NA
IGF1R_HUMAN	P08069	1166	Y	4	Y	o	NA
IGF1R_HUMAN	P08069	980	Y	4	Y	o	NA
IGF1R_HUMAN	P08069	1366	T	4	O	d	ind
IGF1R_HUMAN	P08069	1339	S	2	A	d	ind
IGF1R_HUMAN	P08069	1278	S	4	B	d	isl
IGF1R_HUMAN	P08069	1280	Y	4	Y	d	isl
K132L_HUMAN	A8MWY0	994	Y	1	Y	d	ind
GPAM1_HUMAN	Q8IXQ4	105	S	2	P	d	ind
GPAM1_HUMAN	Q8IXQ4	28	S	2	P	d	ind
GPAM1_HUMAN	Q8IXQ4	140	S	2	A	d	ind
PTSS2_HUMAN	Q9BVG9	46	S	1	A	d	isl
PTSS2_HUMAN	Q9BVG9	47	T	1	B	d	isl
PTSS2_HUMAN	Q9BVG9	16	S	2	P	d	ind
X3CL1_HUMAN	P78423	391	S	1	O	o	NA
AF9_HUMAN	P42568	419	S	2	A	d	ind
AF9_HUMAN	P42568	412	S	2	A	d	ind
AF9_HUMAN	P42568	429	S	2	A	d	ind
AF9_HUMAN	P42568	483	S	2	P	d	isl
AF9_HUMAN	P42568	488	S	2	A	d	isl
ROA3_HUMAN	P51991	355	S	2	O	d	isl
ROA3_HUMAN	P51991	356	S	2	O	d	isl
ROA3_HUMAN	P51991	358	S	2	P	d	isl
ROA3_HUMAN	P51991	360	Y	2	Y	d	isl
ROA3_HUMAN	P51991	43	S	2	A	d	ind
ROA3_HUMAN	P51991	364	Y	2	Y	d	isl
ROA3_HUMAN	P51991	14	S	2	O	d	ind
ROA3_HUMAN	P51991	112	S	2	B	d	isl
ROA3_HUMAN	P51991	116	S	2	B	d	isl
ROA3_HUMAN	P51991	370	S	2	O	d	isl
ROA3_HUMAN	P51991	212	S	1	O	d	ind
ROA3_HUMAN	P51991	373	Y	2	Y	d	isl
ROA3_HUMAN	P51991	375	S	2	O	d	isl
ROA3_HUMAN	P51991	366	S	2	O	d	isl
ROA3_HUMAN	P51991	188	Y	1	Y	o	NA
IFT74_HUMAN	Q96LB3	572	Y	1	Y	d	ind
IFT74_HUMAN	Q96LB3	300	S	1	P	d	ind
RL18_HUMAN	Q07020	130	S	2	P	o	NA
RL18_HUMAN	Q07020	140	S	1	O	o	NA
2A5B_HUMAN	Q15173	20	S	1	P	d	isl
2A5B_HUMAN	Q15173	35	S	3	B	d	isl
2A5B_HUMAN	Q15173	44	S	3	B	d	isl
2A5B_HUMAN	Q15173	46	S	3	B	d	isl
2A5B_HUMAN	Q15173	47	S	3	B	d	isl
2A5B_HUMAN	Q15173	16	S	1	P	d	isl
2A5B_HUMAN	Q15173	52	Y	1	Y	d	isl
2A5B_HUMAN	Q15173	48	S	3	B	d	isl
2A5B_HUMAN	Q15173	32	S	2	O	d	isl
XRCC1_HUMAN	P18887	226	S	2	P	d	ind
XRCC1_HUMAN	P18887	485	S	4	A	d	isl
XRCC1_HUMAN	P18887	518	S	4	A	d	isl
XRCC1_HUMAN	P18887	519	T	4	A	d	isl
XRCC1_HUMAN	P18887	488	T	4	A	d	isl
XRCC1_HUMAN	P18887	525	S	4	A	d	isl
XRCC1_HUMAN	P18887	453	T	2	P	d	isl
XRCC1_HUMAN	P18887	446	S	2	O	d	isl
XRCC1_HUMAN	P18887	447	S	2	P	d	isl
PEBP1_HUMAN	P30086	42	T	4	P	o	NA
PEBP1_HUMAN	P30086	109	S	1	O	d	ind
PEBP1_HUMAN	P30086	13	S	1	A	d	ind
PEBP1_HUMAN	P30086	185	S	1	O	d	ind
PEBP1_HUMAN	P30086	51	T	2	B	o	NA
PEBP1_HUMAN	P30086	52	S	2	B	o	NA
PEBP1_HUMAN	P30086	181	Y	1	Y	o	NA
PEBP1_HUMAN	P30086	54	S	2	A	o	NA
PEBP1_HUMAN	P30086	153	S	4	B	o	NA
OSBL7_HUMAN	Q9BZF2	226	S	2	B	d	ind
OSBL7_HUMAN	Q9BZF2	279	Y	1	Y	d	isl
OSBL7_HUMAN	Q9BZF2	272	S	2	O	d	isl
SYDE1_HUMAN	Q6ZW31	645	S	1	P	d	ind
SYDE1_HUMAN	Q6ZW31	679	T	1	A	d	isl
SYDE1_HUMAN	Q6ZW31	231	S	2	A	d	isl
SYDE1_HUMAN	Q6ZW31	681	S	1	A	d	isl
SYDE1_HUMAN	Q6ZW31	235	S	2	P	d	isl
SYDE1_HUMAN	Q6ZW31	244	S	2	P	d	isl
SYDE1_HUMAN	Q6ZW31	246	T	1	O	d	isl
SYDE1_HUMAN	Q6ZW31	229	Y	1	Y	d	isl
SYDE1_HUMAN	Q6ZW31	683	S	2	A	d	isl
WAPL_HUMAN	Q7Z5K2	452	Y	1	Y	d	isl
WAPL_HUMAN	Q7Z5K2	551	T	2	B	d	isl
WAPL_HUMAN	Q7Z5K2	487	S	2	O	d	ind
WAPL_HUMAN	Q7Z5K2	904	S	2	O	o	NA
WAPL_HUMAN	Q7Z5K2	77	S	2	A	d	isl
WAPL_HUMAN	Q7Z5K2	459	S	2	A	d	isl
WAPL_HUMAN	Q7Z5K2	461	S	2	A	d	isl
WAPL_HUMAN	Q7Z5K2	81	S	2	O	d	isl
WAPL_HUMAN	Q7Z5K2	221	S	2	P	d	isl
WAPL_HUMAN	Q7Z5K2	555	Y	1	Y	d	isl
WAPL_HUMAN	Q7Z5K2	223	S	2	A	d	isl
TIMD4_HUMAN	Q96H15	358	S	1	O	o	NA
TPPC4_HUMAN	Q9Y296	219	S	1	O	d	ind
TPPC4_HUMAN	Q9Y296	168	S	1	O	o	NA
TM245_HUMAN	Q9H330	12	S	2	O	d	isl
TM245_HUMAN	Q9H330	327	S	2	P	d	isl
TM245_HUMAN	Q9H330	329	T	1	O	d	isl
TM245_HUMAN	Q9H330	330	S	2	P	d	isl
TM245_HUMAN	Q9H330	332	S	2	P	d	isl
TM245_HUMAN	Q9H330	334	T	2	O	d	isl
TM245_HUMAN	Q9H330	16	S	1	P	d	isl
PCDGJ_HUMAN	Q9Y5F8	893	Y	1	Y	o	NA
PCDGJ_HUMAN	Q9Y5F8	888	Y	1	Y	o	NA
KI16B_HUMAN	Q96L93	34	T	1	B	d	isl
KI16B_HUMAN	Q96L93	36	T	1	B	d	isl
KI16B_HUMAN	Q96L93	582	S	2	A	d	isl
KI16B_HUMAN	Q96L93	1316	T	1	O	d	ind
KI16B_HUMAN	Q96L93	398	S	2	P	d	isl
KI16B_HUMAN	Q96L93	400	T	1	O	d	isl
KI16B_HUMAN	Q96L93	580	S	1	O	d	isl
KI16B_HUMAN	Q96L93	1172	S	1	B	d	ind
KI16B_HUMAN	Q96L93	53	T	1	B	d	ind
KI16B_HUMAN	Q96L93	566	S	1	B	d	isl
KI16B_HUMAN	Q96L93	573	S	1	O	d	isl
KI16B_HUMAN	Q96L93	575	S	1	A	d	isl
KI16B_HUMAN	Q96L93	662	S	1	B	d	ind
SPHK1_HUMAN	Q9NYA1	225	S	4	P	d	ind
MYT1L_HUMAN	Q9UL68	875	S	1	A	d	isl
MYT1L_HUMAN	Q9UL68	869	Y	1	Y	d	isl
MYT1L_HUMAN	Q9UL68	342	S	1	B	d	ind
MYT1L_HUMAN	Q9UL68	864	S	1	P	d	isl
KPCL_HUMAN	P24723	513	T	1	O	o	NA
KPCL_HUMAN	P24723	675	S	1	B	o	NA
KPCL_HUMAN	P24723	326	S	1	B	d	isl
KPCL_HUMAN	P24723	656	T	2	P	d	ind
KPCL_HUMAN	P24723	320	S	1	O	d	isl
KPCL_HUMAN	P24723	28	S	4	O	o	NA
KPCL_HUMAN	P24723	317	S	1	P	d	isl
KPCL_HUMAN	P24723	32	S	3	B	o	NA
LEG9_HUMAN	O00182	286	S	1	O	d	ind
LEG9_HUMAN	O00182	71	Y	1	Y	o	NA
GTR1_HUMAN	P11166	465	S	2	O	o	NA
GTR1_HUMAN	P11166	226	S	3	B	d	isl
GTR1_HUMAN	P11166	234	T	1	A	d	isl
GTR1_HUMAN	P11166	478	T	2	P	d	ind
GTR1_HUMAN	P11166	490	S	4	O	d	ind
CC186_HUMAN	Q7Z3E2	729	S	1	O	d	isl
CC186_HUMAN	Q7Z3E2	139	S	1	P	d	isl
CC186_HUMAN	Q7Z3E2	740	S	1	P	d	isl
CC186_HUMAN	Q7Z3E2	141	Y	1	Y	d	isl
CC186_HUMAN	Q7Z3E2	726	S	1	B	d	isl
REXO4_HUMAN	Q9GZR2	51	S	1	B	d	ind
LIMK2_HUMAN	P53671	289	S	2	B	d	isl
LIMK2_HUMAN	P53671	293	S	2	P	d	isl
LIMK2_HUMAN	P53671	297	S	1	O	d	isl
LIMK2_HUMAN	P53671	298	S	2	P	d	isl
LIMK2_HUMAN	P53671	505	T	4	B	o	NA
LIMK2_HUMAN	P53671	283	S	4	B	d	isl
LIMK2_HUMAN	P53671	287	S	2	B	d	isl
RBP10_HUMAN	Q6VN20	353	S	1	O	d	isl
RBP10_HUMAN	Q6VN20	386	S	1	P	d	ind
RBP10_HUMAN	Q6VN20	355	S	1	P	d	isl
RBP10_HUMAN	Q6VN20	420	S	1	O	d	isl
RBP10_HUMAN	Q6VN20	358	S	1	A	d	isl
RBP10_HUMAN	Q6VN20	361	S	2	O	d	isl
RBP10_HUMAN	Q6VN20	362	Y	1	Y	d	isl
RBP10_HUMAN	Q6VN20	365	S	2	P	d	isl
RBP10_HUMAN	Q6VN20	451	S	1	A	d	ind
RBP10_HUMAN	Q6VN20	367	S	1	O	d	isl
RBP10_HUMAN	Q6VN20	462	Y	1	Y	d	ind
RBP10_HUMAN	Q6VN20	369	S	2	P	d	isl
RBP10_HUMAN	Q6VN20	489	S	1	A	d	isl
RBP10_HUMAN	Q6VN20	350	S	1	O	d	isl
RBP10_HUMAN	Q6VN20	490	S	1	A	d	isl
RBP10_HUMAN	Q6VN20	352	S	1	B	d	isl
RBP10_HUMAN	Q6VN20	419	S	1	O	d	isl
RBP10_HUMAN	Q6VN20	486	T	1	A	d	isl
RN213_HUMAN	Q63HN8	2273	S	2	P	d	ind
RN213_HUMAN	Q63HN8	308	T	1	O	d	isl
RN213_HUMAN	Q63HN8	302	T	1	O	d	isl
SPTCS_HUMAN	Q96JI7	1961	S	2	O	d	isl
SPTCS_HUMAN	Q96JI7	1955	S	2	B	d	isl
SPTCS_HUMAN	Q96JI7	1956	T	1	B	d	isl
SPTCS_HUMAN	Q96JI7	2174	Y	1	Y	o	NA
NEK1_HUMAN	Q96PY6	1126	S	2	A	d	ind
NEK1_HUMAN	Q96PY6	874	S	1	P	d	ind
NEK1_HUMAN	Q96PY6	14	S	1	O	o	NA
NEK1_HUMAN	Q96PY6	1008	S	1	P	d	ind
[truncated: 50,652 more rows]

## Sheet: mouse_sites_list
id1	id2	pos	aacid	iPTMnet_score	motif_type	ordered/disoredred	in_island/individual
SMYD2_MOUSE	Q8R5A0	284	S	1	P	d	ind
SMYD2_MOUSE	Q8R5A0	14	S	1	B	o	NA
SMYD2_MOUSE	Q8R5A0	240	Y	1	Y	o	NA
DMXL2_MOUSE	Q8BPN8	2017	T	2	P	d	ind
DMXL2_MOUSE	Q8BPN8	1288	S	2	P	d	ind
DMXL2_MOUSE	Q8BPN8	2708	S	1	A	d	ind
DMXL2_MOUSE	Q8BPN8	917	S	1	O	o	NA
DMXL2_MOUSE	Q8BPN8	2501	Y	1	Y	o	NA
DMXL2_MOUSE	Q8BPN8	1860	T	1	O	o	NA
DMXL2_MOUSE	Q8BPN8	675	T	1	P	d	isl
DMXL2_MOUSE	Q8BPN8	678	S	1	A	d	isl
DMXL2_MOUSE	Q8BPN8	423	S	1	A	d	ind
DMXL2_MOUSE	Q8BPN8	936	S	1	O	d	isl
DMXL2_MOUSE	Q8BPN8	1416	T	1	B	d	ind
DMXL2_MOUSE	Q8BPN8	2099	T	1	A	d	ind
DMXL2_MOUSE	Q8BPN8	945	S	1	A	d	isl
DMXL2_MOUSE	Q8BPN8	434	S	1	A	d	ind
DMXL2_MOUSE	Q8BPN8	1203	S	1	A	d	ind
DMXL2_MOUSE	Q8BPN8	1397	T	1	B	d	isl
DMXL2_MOUSE	Q8BPN8	960	S	1	O	d	ind
DMXL2_MOUSE	Q8BPN8	481	S	1	B	d	isl
DMXL2_MOUSE	Q8BPN8	451	S	1	A	d	isl
DMXL2_MOUSE	Q8BPN8	2500	S	1	O	o	NA
DMXL2_MOUSE	Q8BPN8	325	S	1	B	d	isl
DMXL2_MOUSE	Q8BPN8	326	S	2	B	d	isl
DMXL2_MOUSE	Q8BPN8	456	S	1	A	d	isl
DMXL2_MOUSE	Q8BPN8	587	S	1	P	d	ind
DMXL2_MOUSE	Q8BPN8	2636	S	2	B	d	ind
DMXL2_MOUSE	Q8BPN8	462	S	1	A	d	isl
DMXL2_MOUSE	Q8BPN8	463	S	1	A	d	isl
DMXL2_MOUSE	Q8BPN8	721	Y	1	Y	o	NA
DMXL2_MOUSE	Q8BPN8	2774	Y	1	Y	o	NA
DMXL2_MOUSE	Q8BPN8	2773	Y	1	Y	o	NA
DMXL2_MOUSE	Q8BPN8	2767	S	1	B	o	NA
DMXL2_MOUSE	Q8BPN8	2776	T	1	O	o	NA
DMXL2_MOUSE	Q8BPN8	473	S	1	P	d	isl
DMXL2_MOUSE	Q8BPN8	2394	S	2	B	d	isl
DMXL2_MOUSE	Q8BPN8	2396	S	1	B	d	isl
DMXL2_MOUSE	Q8BPN8	221	S	1	B	o	NA
DMXL2_MOUSE	Q8BPN8	1248	S	1	O	d	ind
DMXL2_MOUSE	Q8BPN8	225	S	1	O	o	NA
DMXL2_MOUSE	Q8BPN8	946	S	1	P	d	isl
DMXL2_MOUSE	Q8BPN8	483	S	1	O	d	isl
DMXL2_MOUSE	Q8BPN8	488	T	1	O	d	isl
DMXL2_MOUSE	Q8BPN8	1149	Y	1	Y	o	NA
DMXL2_MOUSE	Q8BPN8	1138	S	1	O	o	NA
DMXL2_MOUSE	Q8BPN8	1395	S	1	B	d	isl
DMXL2_MOUSE	Q8BPN8	1141	S	2	A	o	NA
DMXL2_MOUSE	Q8BPN8	1399	S	2	B	d	isl
DMXL2_MOUSE	Q8BPN8	1144	S	2	O	o	NA
DMXL2_MOUSE	Q8BPN8	1403	S	1	O	d	isl
DMXL2_MOUSE	Q8BPN8	1856	S	2	P	o	NA
DMXL2_MOUSE	Q8BPN8	1021	S	1	A	o	NA
DMXL2_MOUSE	Q8BPN8	1150	S	1	A	o	NA
DMXL2_MOUSE	Q8BPN8	1152	S	1	A	o	NA
NHRF1_MOUSE	P70441	289	S	2	A	d	isl
NHRF1_MOUSE	P70441	2	S	1	A	d	ind
NHRF1_MOUSE	P70441	294	S	2	A	d	isl
NHRF1_MOUSE	P70441	263	S	1	A	d	isl
NHRF1_MOUSE	P70441	264	S	1	B	d	isl
NHRF1_MOUSE	P70441	297	S	2	P	d	isl
NHRF1_MOUSE	P70441	77	S	4	O	o	NA
NHRF1_MOUSE	P70441	46	S	1	P	d	ind
NHRF1_MOUSE	P70441	303	S	1	B	d	isl
NHRF1_MOUSE	P70441	304	T	1	A	d	isl
NHRF1_MOUSE	P70441	273	S	1	A	d	isl
NHRF1_MOUSE	P70441	275	S	2	P	d	isl
NHRF1_MOUSE	P70441	181	S	1	P	d	ind
NHRF1_MOUSE	P70441	117	S	1	A	d	ind
NHRF1_MOUSE	P70441	283	S	2	B	d	isl
NHRF1_MOUSE	P70441	285	S	2	B	d	isl
NHRF1_MOUSE	P70441	286	S	2	A	d	isl
NHRF1_MOUSE	P70441	288	T	2	A	d	isl
DHTK1_MOUSE	A2ATU0	787	T	1	O	o	NA
DHTK1_MOUSE	A2ATU0	431	Y	1	Y	o	NA
MSD2_MOUSE	Q6NZR2	13	S	1	P	d	isl
MSD2_MOUSE	Q6NZR2	48	S	2	P	d	ind
MSD2_MOUSE	Q6NZR2	436	S	2	P	d	ind
MSD2_MOUSE	Q6NZR2	54	S	1	O	d	ind
MSD2_MOUSE	Q6NZR2	24	S	1	P	d	isl
MSD2_MOUSE	Q6NZR2	27	S	2	P	d	isl
MSD2_MOUSE	Q6NZR2	32	S	2	A	d	isl
RHG25_MOUSE	Q8BYW1	535	T	1	A	d	isl
RHG25_MOUSE	Q8BYW1	521	S	1	P	d	isl
RHG25_MOUSE	Q8BYW1	394	T	1	A	d	isl
RHG25_MOUSE	Q8BYW1	396	S	2	B	d	isl
RHG25_MOUSE	Q8BYW1	525	S	1	A	d	isl
RHG25_MOUSE	Q8BYW1	398	S	1	O	d	isl
RHG25_MOUSE	Q8BYW1	400	T	1	O	d	isl
RHG25_MOUSE	Q8BYW1	402	S	1	A	d	isl
RHG25_MOUSE	Q8BYW1	403	S	2	P	d	isl
RHG25_MOUSE	Q8BYW1	534	S	1	A	d	isl
RHG25_MOUSE	Q8BYW1	407	T	2	O	d	isl
RHG25_MOUSE	Q8BYW1	408	S	2	P	d	isl
RHG25_MOUSE	Q8BYW1	537	S	1	A	d	isl
RHG25_MOUSE	Q8BYW1	410	T	1	O	d	isl
RHG25_MOUSE	Q8BYW1	415	S	1	A	d	isl
RHG25_MOUSE	Q8BYW1	422	S	1	O	d	isl
RHG25_MOUSE	Q8BYW1	437	S	1	B	d	isl
RHG25_MOUSE	Q8BYW1	441	T	1	B	d	isl
RHG25_MOUSE	Q8BYW1	443	T	1	B	d	isl
RHG25_MOUSE	Q8BYW1	452	T	1	B	d	ind
RHG25_MOUSE	Q8BYW1	461	S	1	A	d	ind
RHG25_MOUSE	Q8BYW1	25	S	1	B	d	ind
RHG25_MOUSE	Q8BYW1	508	T	1	O	d	isl
RHG25_MOUSE	Q8BYW1	488	S	1	B	d	ind
RHG25_MOUSE	Q8BYW1	363	S	4	P	d	ind
RHG25_MOUSE	Q8BYW1	502	T	1	B	d	isl
RHG25_MOUSE	Q8BYW1	379	S	1	B	d	isl
RHG25_MOUSE	Q8BYW1	380	S	1	O	d	isl
RHG25_MOUSE	Q8BYW1	509	S	1	P	d	isl
RHG25_MOUSE	Q8BYW1	512	S	1	O	d	isl
WDR48_MOUSE	Q8BH57	386	Y	1	Y	o	NA
WDR48_MOUSE	Q8BH57	611	S	1	O	d	ind
WDR48_MOUSE	Q8BH57	119	Y	1	Y	o	NA
WDR48_MOUSE	Q8BH57	586	S	1	A	d	ind
WDR48_MOUSE	Q8BH57	335	S	1	A	o	NA
WDR48_MOUSE	Q8BH57	338	Y	2	Y	o	NA
WDR48_MOUSE	Q8BH57	663	S	1	A	o	NA
WDR48_MOUSE	Q8BH57	28	Y	2	Y	o	NA
WDR48_MOUSE	Q8BH57	125	Y	1	Y	o	NA
WDR48_MOUSE	Q8BH57	480	T	1	P	o	NA
SYTL4_MOUSE	Q9R0Q1	99	S	1	O	o	NA
SYTL4_MOUSE	Q9R0Q1	133	S	1	B	o	NA
SYTL4_MOUSE	Q9R0Q1	295	S	1	O	d	isl
SYTL4_MOUSE	Q9R0Q1	200	S	1	A	d	isl
SYTL4_MOUSE	Q9R0Q1	297	S	1	B	d	isl
SYTL4_MOUSE	Q9R0Q1	202	S	2	A	d	isl
SYTL4_MOUSE	Q9R0Q1	205	S	1	O	d	isl
SYTL4_MOUSE	Q9R0Q1	270	S	1	A	d	ind
SYTL4_MOUSE	Q9R0Q1	206	Y	1	Y	d	isl
SYTL4_MOUSE	Q9R0Q1	275	S	2	A	d	ind
SYTL4_MOUSE	Q9R0Q1	469	S	1	O	o	NA
SYTL4_MOUSE	Q9R0Q1	458	T	1	B	o	NA
SYTL4_MOUSE	Q9R0Q1	218	S	2	B	d	ind
SYTL4_MOUSE	Q9R0Q1	222	S	1	B	d	ind
ZN740_MOUSE	Q6NZQ6	19	S	2	P	d	ind
ZN740_MOUSE	Q6NZQ6	139	S	1	B	d	ind
HPLN4_MOUSE	Q80WM4	195	S	1	A	o	NA
HPLN4_MOUSE	Q80WM4	325	S	1	O	o	NA
SLTM_MOUSE	Q8CH25	11	S	1	O	d	ind
SLTM_MOUSE	Q8CH25	782	S	1	O	d	ind
SLTM_MOUSE	Q8CH25	345	T	1	B	d	isl
SLTM_MOUSE	Q8CH25	542	S	1	A	d	isl
SLTM_MOUSE	Q8CH25	289	S	2	P	d	ind
SLTM_MOUSE	Q8CH25	421	S	1	P	o	NA
SLTM_MOUSE	Q8CH25	550	S	2	B	d	isl
SLTM_MOUSE	Q8CH25	552	S	2	P	d	isl
SLTM_MOUSE	Q8CH25	297	Y	1	Y	d	ind
SLTM_MOUSE	Q8CH25	939	S	1	O	d	ind
SLTM_MOUSE	Q8CH25	812	S	1	A	d	isl
SLTM_MOUSE	Q8CH25	46	T	1	O	o	NA
SLTM_MOUSE	Q8CH25	816	Y	1	Y	d	isl
SLTM_MOUSE	Q8CH25	50	S	1	O	o	NA
SLTM_MOUSE	Q8CH25	821	S	1	B	d	isl
SLTM_MOUSE	Q8CH25	311	S	1	B	d	ind
SLTM_MOUSE	Q8CH25	74	T	1	P	d	isl
SLTM_MOUSE	Q8CH25	139	S	2	A	d	ind
SLTM_MOUSE	Q8CH25	823	S	1	O	d	isl
SLTM_MOUSE	Q8CH25	71	S	1	A	d	isl
SLTM_MOUSE	Q8CH25	201	S	1	A	d	ind
SLTM_MOUSE	Q8CH25	330	S	1	B	d	ind
SLTM_MOUSE	Q8CH25	589	S	1	A	d	ind
SLTM_MOUSE	Q8CH25	80	T	1	B	d	isl
SLTM_MOUSE	Q8CH25	562	T	1	A	d	ind
SLTM_MOUSE	Q8CH25	344	S	1	B	d	isl
SLTM_MOUSE	Q8CH25	217	S	1	A	d	ind
SLTM_MOUSE	Q8CH25	549	S	2	B	d	isl
SLTM_MOUSE	Q8CH25	93	S	1	A	d	ind
SLTM_MOUSE	Q8CH25	992	T	1	O	d	ind
SLTM_MOUSE	Q8CH25	97	S	1	A	d	ind
SLTM_MOUSE	Q8CH25	358	S	1	A	d	ind
SLTM_MOUSE	Q8CH25	999	S	2	P	d	ind
SLTM_MOUSE	Q8CH25	747	S	1	B	d	ind
SLTM_MOUSE	Q8CH25	364	S	1	A	d	ind
SLTM_MOUSE	Q8CH25	1011	S	1	O	d	ind
SLTM_MOUSE	Q8CH25	1017	S	1	B	d	ind
GP182_MOUSE	P43142	329	S	1	B	o	NA
TNNI3_MOUSE	P48787	5	S	1	A	d	isl
TNNI3_MOUSE	P48787	6	S	1	A	d	isl
TNNI3_MOUSE	P48787	167	S	1	A	d	ind
TNNI3_MOUSE	P48787	200	S	2	A	d	ind
TNNI3_MOUSE	P48787	43	S	4	B	d	isl
TNNI3_MOUSE	P48787	45	S	4	B	d	isl
TNNI3_MOUSE	P48787	144	T	4	B	o	NA
TNNI3_MOUSE	P48787	23	S	4	B	d	isl
TNNI3_MOUSE	P48787	24	S	4	B	d	isl
TNNI3_MOUSE	P48787	27	Y	1	Y	d	isl
TNNI3_MOUSE	P48787	151	S	1	A	o	NA
TNNI3_MOUSE	P48787	134	Y	1	Y	o	NA
TMA16_MOUSE	Q9CR02	209	T	1	A	d	isl
TMA16_MOUSE	Q9CR02	219	S	1	P	d	isl
TMA16_MOUSE	Q9CR02	204	S	1	A	d	isl
TMA16_MOUSE	Q9CR02	206	S	1	A	d	isl
TMA16_MOUSE	Q9CR02	207	S	1	A	d	isl
ZNT9_MOUSE	Q5IRJ6	354	S	1	A	o	NA
PDLI4_MOUSE	P70271	316	Y	1	Y	o	NA
PDLI4_MOUSE	P70271	229	S	1	B	d	ind
PDLI4_MOUSE	P70271	134	S	1	P	d	ind
PDLI4_MOUSE	P70271	265	T	1	O	o	NA
PDLI4_MOUSE	P70271	11	S	1	P	o	NA
PDLI4_MOUSE	P70271	111	S	2	P	d	isl
PDLI4_MOUSE	P70271	114	T	1	O	d	isl
PDLI4_MOUSE	P70271	115	S	2	O	d	isl
PDLI4_MOUSE	P70271	118	S	2	B	d	isl
PDLI4_MOUSE	P70271	119	S	2	B	d	isl
PDLI4_MOUSE	P70271	121	S	1	B	d	isl
PDLI4_MOUSE	P70271	124	S	2	A	d	isl
PDLI4_MOUSE	P70271	107	S	2	A	d	isl
PDLI4_MOUSE	P70271	191	Y	1	Y	d	ind
NOL6_MOUSE	Q8R5K4	179	T	1	O	o	NA
NOL6_MOUSE	Q8R5K4	823	S	1	A	d	ind
NOL6_MOUSE	Q8R5K4	167	S	1	B	o	NA
ZFP3_MOUSE	Q8BLB0	243	T	1	B	o	NA
ZFP3_MOUSE	Q8BLB0	383	T	1	B	d	ind
ZFP3_MOUSE	Q8BLB0	215	T	1	B	d	ind
MAP1B_MOUSE	P14873	1539	Y	1	Y	d	ind
MAP1B_MOUSE	P14873	2053	Y	1	Y	d	isl
MAP1B_MOUSE	P14873	2054	S	1	A	d	isl
MAP1B_MOUSE	P14873	2055	Y	1	Y	d	isl
MAP1B_MOUSE	P14873	1036	T	1	A	d	ind
MAP1B_MOUSE	P14873	527	T	2	P	d	ind
MAP1B_MOUSE	P14873	2068	S	2	P	d	ind
MAP1B_MOUSE	P14873	541	S	2	B	d	ind
MAP1B_MOUSE	P14873	91	S	1	P	d	ind
MAP1B_MOUSE	P14873	544	S	2	B	d	ind
MAP1B_MOUSE	P14873	2082	S	1	A	d	isl
MAP1B_MOUSE	P14873	2083	S	1	A	d	isl
MAP1B_MOUSE	P14873	38	Y	1	Y	o	NA
MAP1B_MOUSE	P14873	1885	Y	1	Y	d	isl
MAP1B_MOUSE	P14873	2091	T	1	A	d	isl
MAP1B_MOUSE	P14873	556	S	1	B	d	ind
MAP1B_MOUSE	P14873	2094	S	2	P	d	isl
MAP1B_MOUSE	P14873	1073	S	2	P	d	ind
MAP1B_MOUSE	P14873	2115	S	1	A	d	isl
MAP1B_MOUSE	P14873	2120	T	1	B	d	isl
MAP1B_MOUSE	P14873	2122	S	1	O	d	isl
MAP1B_MOUSE	P14873	1614	S	1	B	d	isl
MAP1B_MOUSE	P14873	1616	S	2	P	d	isl
MAP1B_MOUSE	P14873	1621	S	2	P	d	isl
MAP1B_MOUSE	P14873	1627	S	1	B	d	isl
MAP1B_MOUSE	P14873	1629	T	1	P	d	isl
MAP1B_MOUSE	P14873	608	S	1	B	d	isl
MAP1B_MOUSE	P14873	609	S	1	A	d	isl
MAP1B_MOUSE	P14873	614	S	2	P	d	isl
MAP1B_MOUSE	P14873	1642	S	1	A	d	ind
MAP1B_MOUSE	P14873	1649	S	1	P	d	ind
MAP1B_MOUSE	P14873	1141	S	2	A	d	isl
MAP1B_MOUSE	P14873	1144	T	1	A	d	isl
MAP1B_MOUSE	P14873	2325	S	1	O	d	ind
MAP1B_MOUSE	P14873	1149	T	1	A	d	isl
MAP1B_MOUSE	P14873	1662	S	2	P	d	ind
MAP1B_MOUSE	P14873	1151	S	2	P	d	isl
MAP1B_MOUSE	P14873	2176	S	1	A	d	ind
MAP1B_MOUSE	P14873	1153	S	2	A	d	isl
MAP1B_MOUSE	P14873	1915	S	1	O	d	isl
MAP1B_MOUSE	P14873	1167	Y	1	Y	d	isl
MAP1B_MOUSE	P14873	1168	S	1	A	d	isl
MAP1B_MOUSE	P14873	1686	S	1	P	d	ind
MAP1B_MOUSE	P14873	2205	S	1	P	d	isl
MAP1B_MOUSE	P14873	1183	S	1	A	d	ind
MAP1B_MOUSE	P14873	1186	S	1	A	d	ind
MAP1B_MOUSE	P14873	1204	S	2	P	d	isl
MAP1B_MOUSE	P14873	1207	S	2	A	d	isl
MAP1B_MOUSE	P14873	1208	S	1	A	d	isl
MAP1B_MOUSE	P14873	1653	S	1	O	d	ind
MAP1B_MOUSE	P14873	702	T	1	P	d	ind
MAP1B_MOUSE	P14873	2246	T	1	B	d	isl
MAP1B_MOUSE	P14873	1826	Y	1	Y	d	isl
MAP1B_MOUSE	P14873	1225	S	2	A	d	ind
MAP1B_MOUSE	P14873	2251	S	1	B	d	isl
MAP1B_MOUSE	P14873	2252	S	1	P	d	isl
MAP1B_MOUSE	P14873	1883	Y	1	Y	d	isl
MAP1B_MOUSE	P14873	1242	S	2	B	d	isl
MAP1B_MOUSE	P14873	2267	S	1	P	d	ind
MAP1B_MOUSE	P14873	734	S	1	B	d	ind
MAP1B_MOUSE	P14873	1247	S	2	P	d	isl
MAP1B_MOUSE	P14873	1251	S	2	P	d	isl
MAP1B_MOUSE	P14873	1969	T	1	A	d	isl
MAP1B_MOUSE	P14873	1253	S	2	B	d	isl
MAP1B_MOUSE	P14873	1831	S	1	O	d	isl
MAP1B_MOUSE	P14873	1255	S	2	P	d	isl
MAP1B_MOUSE	P14873	1768	S	2	B	d	ind
MAP1B_MOUSE	P14873	1257	S	2	P	d	isl
MAP1B_MOUSE	P14873	1260	S	4	P	d	isl
MAP1B_MOUSE	P14873	2285	S	1	P	d	ind
MAP1B_MOUSE	P14873	1775	S	2	P	d	isl
MAP1B_MOUSE	P14873	894	T	1	A	d	isl
MAP1B_MOUSE	P14873	1265	T	3	P	d	isl
MAP1B_MOUSE	P14873	1778	S	2	A	d	isl
MAP1B_MOUSE	P14873	1781	S	2	P	d	isl
MAP1B_MOUSE	P14873	1271	S	1	O	d	isl
MAP1B_MOUSE	P14873	1784	T	2	P	d	isl
MAP1B_MOUSE	P14873	1275	S	1	O	d	isl
MAP1B_MOUSE	P14873	1788	S	2	O	d	isl
MAP1B_MOUSE	P14873	1789	S	2	P	d	isl
MAP1B_MOUSE	P14873	1792	Y	2	Y	d	isl
MAP1B_MOUSE	P14873	1793	S	2	P	d	isl
MAP1B_MOUSE	P14873	1953	Y	1	Y	d	isl
MAP1B_MOUSE	P14873	1797	S	2	A	d	isl
MAP1B_MOUSE	P14873	1291	S	1	O	d	isl
MAP1B_MOUSE	P14873	1293	S	1	P	d	isl
MAP1B_MOUSE	P14873	1806	T	2	O	d	isl
MAP1B_MOUSE	P14873	46	T	1	A	o	NA
MAP1B_MOUSE	P14873	1813	S	2	O	d	isl
MAP1B_MOUSE	P14873	1814	S	1	O	d	isl
MAP1B_MOUSE	P14873	1815	S	2	P	d	isl
MAP1B_MOUSE	P14873	1307	S	2	P	d	isl
MAP1B_MOUSE	P14873	1312	T	1	A	d	isl
MAP1B_MOUSE	P14873	561	S	2	B	d	ind
MAP1B_MOUSE	P14873	1317	S	2	P	d	isl
MAP1B_MOUSE	P14873	1319	S	2	O	d	isl
MAP1B_MOUSE	P14873	1321	S	2	O	d	isl
MAP1B_MOUSE	P14873	1323	T	2	O	d	isl
MAP1B_MOUSE	P14873	1325	S	2	O	d	isl
MAP1B_MOUSE	P14873	1329	T	1	P	d	isl
MAP1B_MOUSE	P14873	1331	Y	2	Y	d	isl
MAP1B_MOUSE	P14873	1332	Y	2	Y	d	isl
MAP1B_MOUSE	P14873	1334	S	2	P	d	isl
MAP1B_MOUSE	P14873	1336	T	1	A	d	isl
MAP1B_MOUSE	P14873	825	S	2	O	d	isl
MAP1B_MOUSE	P14873	828	S	2	A	d	isl
MAP1B_MOUSE	P14873	829	S	2	P	d	isl
MAP1B_MOUSE	P14873	1856	S	1	O	d	isl
MAP1B_MOUSE	P14873	834	T	1	A	d	isl
MAP1B_MOUSE	P14873	1860	T	1	P	d	isl
MAP1B_MOUSE	P14873	1866	Y	1	Y	d	isl
MAP1B_MOUSE	P14873	1868	Y	1	Y	d	isl
MAP1B_MOUSE	P14873	336	S	2	O	d	isl
MAP1B_MOUSE	P14873	339	S	2	O	d	isl
MAP1B_MOUSE	P14873	341	S	1	A	d	isl
MAP1B_MOUSE	P14873	343	S	2	A	d	isl
MAP1B_MOUSE	P14873	741	T	1	P	d	ind
MAP1B_MOUSE	P14873	1371	S	2	O	d	isl
MAP1B_MOUSE	P14873	1373	S	2	P	d	isl
MAP1B_MOUSE	P14873	1382	S	2	A	d	isl
MAP1B_MOUSE	P14873	1384	S	2	P	d	isl
MAP1B_MOUSE	P14873	2410	S	2	O	o	NA
MAP1B_MOUSE	P14873	1900	Y	1	Y	d	isl
MAP1B_MOUSE	P14873	1901	Y	1	Y	d	isl
MAP1B_MOUSE	P14873	1902	Y	1	Y	d	isl
MAP1B_MOUSE	P14873	1391	S	2	P	d	isl
MAP1B_MOUSE	P14873	1395	S	2	P	d	isl
MAP1B_MOUSE	P14873	885	S	2	A	d	isl
MAP1B_MOUSE	P14873	1911	S	2	P	d	isl
MAP1B_MOUSE	P14873	888	S	2	P	d	isl
MAP1B_MOUSE	P14873	1401	S	1	A	d	isl
MAP1B_MOUSE	P14873	1403	S	2	P	d	isl
MAP1B_MOUSE	P14873	1405	Y	2	Y	d	isl
MAP1B_MOUSE	P14873	1918	S	1	A	d	isl
MAP1B_MOUSE	P14873	1919	Y	1	Y	d	isl
MAP1B_MOUSE	P14873	896	T	1	A	d	isl
MAP1B_MOUSE	P14873	1410	S	1	A	d	isl
MAP1B_MOUSE	P14873	1928	T	2	P	d	ind
MAP1B_MOUSE	P14873	905	T	2	P	d	ind
MAP1B_MOUSE	P14873	1420	S	1	A	d	isl
MAP1B_MOUSE	P14873	1422	S	1	P	d	isl
MAP1B_MOUSE	P14873	2030	S	2	P	d	isl
MAP1B_MOUSE	P14873	401	S	1	O	o	NA
MAP1B_MOUSE	P14873	1942	T	1	O	d	isl
MAP1B_MOUSE	P14873	1943	T	1	O	d	isl
MAP1B_MOUSE	P14873	1945	T	2	P	d	isl
MAP1B_MOUSE	P14873	1438	S	2	P	d	isl
MAP1B_MOUSE	P14873	1951	Y	1	Y	d	isl
MAP1B_MOUSE	P14873	1952	S	1	A	d	isl
MAP1B_MOUSE	P14873	1441	S	1	A	d	isl
MAP1B_MOUSE	P14873	1956	S	1	A	d	isl
MAP1B_MOUSE	P14873	933	S	1	A	d	isl
MAP1B_MOUSE	P14873	934	S	2	A	d	isl
MAP1B_MOUSE	P14873	1959	T	1	O	d	isl
MAP1B_MOUSE	P14873	936	T	1	A	d	isl
MAP1B_MOUSE	P14873	1962	T	1	P	d	isl
MAP1B_MOUSE	P14873	939	Y	1	Y	d	isl
MAP1B_MOUSE	P14873	1966	S	1	O	d	isl
MAP1B_MOUSE	P14873	1968	Y	1	Y	d	isl
MAP1B_MOUSE	P14873	945	T	2	B	d	isl
MAP1B_MOUSE	P14873	1970	Y	1	Y	d	isl
MAP1B_MOUSE	P14873	436	Y	1	Y	o	NA
MAP1B_MOUSE	P14873	2207	S	1	P	d	isl
MAP1B_MOUSE	P14873	960	S	1	O	d	isl
MAP1B_MOUSE	P14873	962	S	1	O	d	isl
MAP1B_MOUSE	P14873	1478	T	1	O	d	ind
MAP1B_MOUSE	P14873	967	S	2	P	d	isl
MAP1B_MOUSE	P14873	969	T	1	A	d	isl
MAP1B_MOUSE	P14873	974	S	2	O	d	isl
MAP1B_MOUSE	P14873	2003	S	1	A	d	ind
MAP1B_MOUSE	P14873	1444	T	1	O	d	isl
MAP1B_MOUSE	P14873	1497	S	2	P	d	isl
MAP1B_MOUSE	P14873	1499	T	1	A	d	isl
MAP1B_MOUSE	P14873	989	S	2	B	d	ind
MAP1B_MOUSE	P14873	992	S	2	A	d	ind
MAP1B_MOUSE	P14873	1508	S	2	A	d	isl
MAP1B_MOUSE	P14873	1513	T	1	B	d	isl
MAP1B_MOUSE	P14873	1277	T	2	P	d	isl
MAP1B_MOUSE	P14873	2027	T	1	O	d	isl
MAP1B_MOUSE	P14873	1960	T	1	O	d	isl
MAP1B_MOUSE	P14873	1518	S	1	A	d	isl
MAP1B_MOUSE	P14873	2033	T	1	O	d	isl
MAP1B_MOUSE	P14873	1523	S	2	A	d	isl
MAP1B_MOUSE	P14873	1013	S	2	A	d	ind
MAP1B_MOUSE	P14873	2038	Y	1	Y	d	isl
MAP1B_MOUSE	P14873	1877	S	2	P	d	isl
MAP1B_MOUSE	P14873	2047	T	1	P	d	isl
PTPRQ_MOUSE	P0C5E4	1329	S	1	O	o	NA
PTPRQ_MOUSE	P0C5E4	198	S	1	B	o	NA
PTPRQ_MOUSE	P0C5E4	2158	T	1	O	o	NA
AHDC1_MOUSE	Q6PAL7	1540	S	2	P	d	ind
AHDC1_MOUSE	Q6PAL7	1180	S	2	B	d	ind
AHDC1_MOUSE	Q6PAL7	669	T	1	B	d	ind
AHDC1_MOUSE	Q6PAL7	1315	S	1	O	d	isl
AHDC1_MOUSE	Q6PAL7	1060	S	1	P	d	ind
AHDC1_MOUSE	Q6PAL7	1317	S	1	P	d	isl
AHDC1_MOUSE	Q6PAL7	1449	S	1	P	d	ind
AHDC1_MOUSE	Q6PAL7	46	S	1	P	d	ind
AHDC1_MOUSE	Q6PAL7	687	S	1	A	o	NA
AHDC1_MOUSE	Q6PAL7	1463	S	1	O	d	isl
AHDC1_MOUSE	Q6PAL7	825	S	1	A	d	ind
AHDC1_MOUSE	Q6PAL7	1467	S	1	P	d	isl
AHDC1_MOUSE	Q6PAL7	1088	S	1	P	d	ind
AHDC1_MOUSE	Q6PAL7	1346	T	1	P	d	isl
AHDC1_MOUSE	Q6PAL7	1348	S	1	A	d	isl
AHDC1_MOUSE	Q6PAL7	70	S	1	B	d	isl
AHDC1_MOUSE	Q6PAL7	71	S	1	B	d	isl
AHDC1_MOUSE	Q6PAL7	842	S	2	A	d	ind
AHDC1_MOUSE	Q6PAL7	845	S	1	A	d	ind
AHDC1_MOUSE	Q6PAL7	1360	S	1	P	d	ind
AHDC1_MOUSE	Q6PAL7	593	S	1	P	d	ind
AHDC1_MOUSE	Q6PAL7	1498	S	1	P	d	isl
AHDC1_MOUSE	Q6PAL7	732	T	1	O	d	ind
AHDC1_MOUSE	Q6PAL7	1502	T	1	P	d	isl
AHDC1_MOUSE	Q6PAL7	99	S	1	P	d	ind
AHDC1_MOUSE	Q6PAL7	636	T	1	P	d	ind
AHDC1_MOUSE	Q6PAL7	1392	S	2	P	d	isl
AHDC1_MOUSE	Q6PAL7	1394	T	1	O	d	isl
AHDC1_MOUSE	Q6PAL7	1396	S	2	P	d	isl
AHDC1_MOUSE	Q6PAL7	630	S	1	P	d	ind
AHDC1_MOUSE	Q6PAL7	892	S	2	P	d	ind
GLI3_MOUSE	Q61602	865	S	1	B	d	ind
GLI3_MOUSE	Q61602	295	S	1	B	d	ind
GLI3_MOUSE	Q61602	873	S	1	O	d	ind
GLI3_MOUSE	Q61602	93	S	1	B	d	ind
GLI3_MOUSE	Q61602	588	S	1	B	d	ind
GLI3_MOUSE	Q61602	910	S	1	A	d	ind
GLI3_MOUSE	Q61602	591	S	1	A	d	ind
GLI3_MOUSE	Q61602	1006	S	1	B	d	ind
GLI3_MOUSE	Q61602	849	S	1	B	d	ind
GLI3_MOUSE	Q61602	658	S	1	O	d	isl
GLI3_MOUSE	Q61602	1523	S	1	O	d	ind
GLI3_MOUSE	Q61602	660	S	1	O	d	isl
GLI3_MOUSE	Q61602	565	T	1	B	d	ind
GLI3_MOUSE	Q61602	662	S	1	O	d	isl
GLI3_MOUSE	Q61602	856	S	1	O	d	ind
GLI3_MOUSE	Q61602	445	S	1	P	d	ind
GLI3_MOUSE	Q61602	980	S	1	B	d	ind
CP2DB_MOUSE	P24457	313	T	1	O	o	NA
CP2DB_MOUSE	P24457	138	S	1	B	o	NA
CP2DB_MOUSE	P24457	275	T	1	B	o	NA
CD34_MOUSE	Q64314	326	Y	2	Y	d	isl
CD34_MOUSE	Q64314	327	Y	1	Y	d	isl
CD34_MOUSE	Q64314	175	S	1	B	d	ind
CD34_MOUSE	Q64314	336	Y	2	Y	d	isl
CD34_MOUSE	Q64314	337	S	2	O	d	isl
CD34_MOUSE	Q64314	338	S	2	O	d	isl
CD34_MOUSE	Q64314	371	S	2	O	d	ind
CD34_MOUSE	Q64314	343	S	4	P	d	isl
CD34_MOUSE	Q64314	313	S	2	B	o	NA
PHF1_MOUSE	Q9Z1B8	514	S	1	P	d	ind
PHF1_MOUSE	Q9Z1B8	423	S	1	O	d	ind
PHF1_MOUSE	Q9Z1B8	50	T	1	O	o	NA
PHF1_MOUSE	Q9Z1B8	20	S	1	P	d	ind
PHF1_MOUSE	Q9Z1B8	507	S	1	P	d	ind
PHF1_MOUSE	Q9Z1B8	415	S	1	P	d	ind
RET3_MOUSE	P49194	734	T	1	A	o	NA
SLF2_MOUSE	Q6P9P0	68	S	1	P	d	ind
SLF2_MOUSE	Q6P9P0	454	S	1	A	d	ind
SLF2_MOUSE	Q6P9P0	712	S	1	O	d	ind
SLF2_MOUSE	Q6P9P0	268	S	1	A	d	ind
SLF2_MOUSE	Q6P9P0	175	S	1	B	d	ind
SLF2_MOUSE	Q6P9P0	708	S	1	A	d	ind
SLF2_MOUSE	Q6P9P0	725	T	1	O	d	ind
SLF2_MOUSE	Q6P9P0	605	T	1	B	d	ind
SLF2_MOUSE	Q6P9P0	318	S	1	B	d	ind
SLF2_MOUSE	Q6P9P0	806	S	1	P	d	ind
HNRH1_MOUSE	O35737	161	S	1	A	o	NA
HNRH1_MOUSE	O35737	100	T	1	O	o	NA
HNRH1_MOUSE	O35737	104	S	1	P	d	isl
HNRH1_MOUSE	O35737	266	Y	1	Y	d	ind
HNRH1_MOUSE	O35737	107	T	1	A	d	isl
HNRH1_MOUSE	O35737	77	T	1	B	o	NA
HNRH1_MOUSE	O35737	47	Y	1	Y	o	NA
HNRH1_MOUSE	O35737	272	S	1	A	d	ind
HNRH1_MOUSE	O35737	306	Y	1	Y	o	NA
HNRH1_MOUSE	O35737	243	Y	1	Y	d	isl
HNRH1_MOUSE	O35737	180	Y	1	Y	o	NA
HNRH1_MOUSE	O35737	21	S	1	O	o	NA
HNRH1_MOUSE	O35737	310	S	1	P	o	NA
HNRH1_MOUSE	O35737	23	S	1	A	o	NA
HNRH1_MOUSE	O35737	249	Y	1	Y	d	isl
HNRH1_MOUSE	O35737	186	S	1	O	d	isl
HNRH1_MOUSE	O35737	187	S	1	A	d	isl
HNRH1_MOUSE	O35737	63	S	1	A	d	ind
HNRH1_MOUSE	O35737	246	Y	1	Y	d	isl
RLA1_MOUSE	P47955	58	S	1	O	o	NA
RLA1_MOUSE	P47955	101	S	2	A	d	isl
RLA1_MOUSE	P47955	38	S	1	A	o	NA
RLA1_MOUSE	P47955	104	S	2	A	d	isl
KLC4_MOUSE	Q9DBS5	609	S	1	B	d	isl
KLC4_MOUSE	Q9DBS5	449	Y	1	Y	o	NA
KLC4_MOUSE	Q9DBS5	611	S	1	A	d	isl
KLC4_MOUSE	Q9DBS5	612	T	1	A	d	isl
KLC4_MOUSE	Q9DBS5	581	S	1	O	d	isl
KLC4_MOUSE	Q9DBS5	582	S	1	B	d	isl
KLC4_MOUSE	Q9DBS5	554	S	1	B	d	isl
KLC4_MOUSE	Q9DBS5	460	S	1	P	o	NA
KLC4_MOUSE	Q9DBS5	174	S	2	A	d	ind
KLC4_MOUSE	Q9DBS5	590	S	2	B	d	isl
KLC4_MOUSE	Q9DBS5	593	Y	1	Y	d	isl
KLC4_MOUSE	Q9DBS5	565	S	1	A	d	isl
KLC4_MOUSE	Q9DBS5	566	S	2	B	d	isl
ZN436_MOUSE	Q8BPP0	283	T	1	B	d	ind
ZN436_MOUSE	Q8BPP0	423	T	1	B	d	ind
ATOH8_MOUSE	Q99NA2	125	T	1	P	d	ind
RN214_MOUSE	Q8BFU3	36	S	1	P	d	ind
RN214_MOUSE	Q8BFU3	196	S	1	O	d	ind
RN214_MOUSE	Q8BFU3	13	T	1	P	d	ind
RN214_MOUSE	Q8BFU3	48	S	2	P	d	ind
RN214_MOUSE	Q8BFU3	500	S	1	P	d	ind
RN214_MOUSE	Q8BFU3	575	T	1	O	o	NA
RN214_MOUSE	Q8BFU3	27	S	1	A	d	ind
RN214_MOUSE	Q8BFU3	511	S	2	P	d	ind
MAT1_MOUSE	P51949	33	S	1	A	o	NA
MAT1_MOUSE	P51949	51	T	1	P	o	NA
MAT1_MOUSE	P51949	29	T	1	A	o	NA
MAT1_MOUSE	P51949	279	S	2	P	o	NA
GNDS_MOUSE	Q03385	710	T	1	O	d	isl
GNDS_MOUSE	Q03385	463	Y	1	Y	d	ind
GNDS_MOUSE	Q03385	752	Y	1	Y	o	NA
GNDS_MOUSE	Q03385	692	S	1	O	d	isl
GNDS_MOUSE	Q03385	53	Y	1	Y	o	NA
GNDS_MOUSE	Q03385	697	T	1	O	d	isl
GNDS_MOUSE	Q03385	784	Y	1	Y	o	NA
GNDS_MOUSE	Q03385	701	S	1	O	d	isl
GNDS_MOUSE	Q03385	607	S	1	B	d	ind
CUX1_MOUSE	P53564	1155	S	3	A	o	NA
CUX1_MOUSE	P53564	904	S	1	P	d	isl
CUX1_MOUSE	P53564	1290	Y	1	Y	o	NA
CUX1_MOUSE	P53564	908	S	1	O	d	isl
CUX1_MOUSE	P53564	1170	S	1	B	o	NA
CUX1_MOUSE	P53564	1054	S	1	P	d	ind
CUX1_MOUSE	P53564	1316	S	1	P	d	ind
CUX1_MOUSE	P53564	427	S	2	P	d	ind
CUX1_MOUSE	P53564	1328	S	1	A	d	ind
CUX1_MOUSE	P53564	1332	S	2	A	d	ind
CUX1_MOUSE	P53564	1339	T	1	A	d	ind
CUX1_MOUSE	P53564	1471	S	1	O	d	ind
CUX1_MOUSE	P53564	583	S	3	A	o	NA
CUX1_MOUSE	P53564	972	S	3	A	d	ind
CUX1_MOUSE	P53564	1232	S	1	P	d	ind
CUX1_MOUSE	P53564	1211	S	1	B	d	isl
CUX1_MOUSE	P53564	1506	S	2	B	d	ind
CUX1_MOUSE	P53564	1265	S	1	P	d	ind
CUX1_MOUSE	P53564	882	S	1	P	d	isl
CUX1_MOUSE	P53564	885	S	1	O	d	isl
CUX1_MOUSE	P53564	1215	S	1	O	d	isl
CUX1_MOUSE	P53564	1467	S	1	B	d	ind
SAHH_MOUSE	P50247	193	Y	2	Y	o	NA
SAHH_MOUSE	P50247	2	S	1	A	d	ind
SAHH_MOUSE	P50247	183	S	1	O	o	NA
SAHH_MOUSE	P50247	416	Y	1	Y	o	NA
EGR4_MOUSE	Q9WUF2	230	S	1	O	o	NA
PPM1H_MOUSE	Q3UYC0	226	T	1	O	d	isl
PPM1H_MOUSE	Q3UYC0	198	T	1	P	d	ind
PPM1H_MOUSE	Q3UYC0	7	S	1	B	d	ind
PPM1H_MOUSE	Q3UYC0	111	T	1	B	d	isl
PPM1H_MOUSE	Q3UYC0	113	T	2	P	d	isl
PPM1H_MOUSE	Q3UYC0	210	S	1	B	d	ind
PPM1H_MOUSE	Q3UYC0	118	S	2	O	d	isl
PPM1H_MOUSE	Q3UYC0	122	S	1	B	d	isl
PPM1H_MOUSE	Q3UYC0	123	S	2	B	d	isl
PPM1H_MOUSE	Q3UYC0	220	S	2	P	d	isl
PPM1H_MOUSE	Q3UYC0	223	T	2	P	d	isl
ANK2_MOUSE	Q8C8R3	10	S	1	A	d	ind
ANK2_MOUSE	Q8C8R3	531	Y	1	Y	o	NA
ANK2_MOUSE	Q8C8R3	1562	S	2	A	d	ind
ANK2_MOUSE	Q8C8R3	29	S	1	A	d	isl
ANK2_MOUSE	Q8C8R3	31	S	2	B	d	isl
ANK2_MOUSE	Q8C8R3	34	S	2	O	d	isl
ANK2_MOUSE	Q8C8R3	2090	S	2	P	d	ind
ANK2_MOUSE	Q8C8R3	3848	Y	1	Y	d	isl
ANK2_MOUSE	Q8C8R3	2620	S	1	B	d	isl
ANK2_MOUSE	Q8C8R3	2624	S	1	A	d	isl
ANK2_MOUSE	Q8C8R3	2626	S	1	A	d	isl
ANK2_MOUSE	Q8C8R3	1097	S	1	P	d	ind
ANK2_MOUSE	Q8C8R3	2639	S	2	O	d	ind
ANK2_MOUSE	Q8C8R3	3669	S	1	O	d	ind
ANK2_MOUSE	Q8C8R3	3682	T	1	A	d	ind
ANK2_MOUSE	Q8C8R3	2661	S	1	O	d	isl
ANK2_MOUSE	Q8C8R3	3686	S	2	P	d	ind
ANK2_MOUSE	Q8C8R3	2664	S	1	P	d	isl
ANK2_MOUSE	Q8C8R3	3692	S	2	P	d	ind
ANK2_MOUSE	Q8C8R3	2669	T	1	O	d	isl
ANK2_MOUSE	Q8C8R3	3774	S	1	A	d	isl
ANK2_MOUSE	Q8C8R3	3718	T	2	P	d	ind
ANK2_MOUSE	Q8C8R3	3212	S	1	P	d	ind
ANK2_MOUSE	Q8C8R3	3730	T	1	O	d	isl
ANK2_MOUSE	Q8C8R3	3735	S	1	O	d	isl
ANK2_MOUSE	Q8C8R3	3226	S	2	P	d	isl
ANK2_MOUSE	Q8C8R3	3739	T	2	P	d	isl
ANK2_MOUSE	Q8C8R3	3229	S	2	A	d	isl
ANK2_MOUSE	Q8C8R3	2206	S	2	P	d	isl
ANK2_MOUSE	Q8C8R3	3744	S	1	O	d	isl
ANK2_MOUSE	Q8C8R3	3745	T	2	P	d	isl
ANK2_MOUSE	Q8C8R3	1699	S	2	B	d	isl
ANK2_MOUSE	Q8C8R3	1700	S	2	B	d	isl
ANK2_MOUSE	Q8C8R3	2213	S	1	P	d	ind
ANK2_MOUSE	Q8C8R3	3750	T	1	O	d	isl
ANK2_MOUSE	Q8C8R3	1703	S	2	A	d	isl
ANK2_MOUSE	Q8C8R3	3756	T	2	P	d	isl
ANK2_MOUSE	Q8C8R3	3759	T	2	A	d	isl
ANK2_MOUSE	Q8C8R3	3764	S	2	P	d	isl
ANK2_MOUSE	Q8C8R3	2741	S	2	P	d	ind
ANK2_MOUSE	Q8C8R3	2232	T	2	P	d	isl
ANK2_MOUSE	Q8C8R3	2234	T	1	A	d	isl
ANK2_MOUSE	Q8C8R3	2238	S	2	A	d	isl
ANK2_MOUSE	Q8C8R3	2718	S	1	A	d	ind
ANK2_MOUSE	Q8C8R3	2755	S	2	P	d	ind
ANK2_MOUSE	Q8C8R3	3780	S	1	B	d	isl
ANK2_MOUSE	Q8C8R3	3781	S	1	P	d	isl
ANK2_MOUSE	Q8C8R3	3785	T	1	B	d	isl
ANK2_MOUSE	Q8C8R3	3230	S	2	P	d	isl
ANK2_MOUSE	Q8C8R3	378	Y	1	Y	o	NA
ANK2_MOUSE	Q8C8R3	2777	T	1	A	d	ind
ANK2_MOUSE	Q8C8R3	222	S	1	O	d	ind
ANK2_MOUSE	Q8C8R3	3315	S	1	P	d	ind
ANK2_MOUSE	Q8C8R3	2824	S	1	P	d	ind
ANK2_MOUSE	Q8C8R3	3850	S	2	B	d	isl
ANK2_MOUSE	Q8C8R3	3341	S	1	A	d	isl
ANK2_MOUSE	Q8C8R3	3343	S	2	B	d	isl
ANK2_MOUSE	Q8C8R3	1816	S	2	P	d	ind
ANK2_MOUSE	Q8C8R3	1925	S	1	P	d	ind
ANK2_MOUSE	Q8C8R3	1819	S	2	P	d	ind
ANK2_MOUSE	Q8C8R3	2333	T	2	P	d	ind
ANK2_MOUSE	Q8C8R3	3362	S	2	B	d	isl
ANK2_MOUSE	Q8C8R3	3363	Y	1	Y	d	isl
ANK2_MOUSE	Q8C8R3	1828	S	1	P	d	ind
ANK2_MOUSE	Q8C8R3	808	S	1	A	o	NA
ANK2_MOUSE	Q8C8R3	1839	S	1	P	d	ind
ANK2_MOUSE	Q8C8R3	3888	S	1	A	d	ind
ANK2_MOUSE	Q8C8R3	3379	S	1	A	d	isl
ANK2_MOUSE	Q8C8R3	3381	S	1	A	d	isl
ANK2_MOUSE	Q8C8R3	3893	S	1	A	d	ind
ANK2_MOUSE	Q8C8R3	1851	S	1	P	d	ind
ANK2_MOUSE	Q8C8R3	828	T	1	A	d	ind
ANK2_MOUSE	Q8C8R3	1349	Y	2	Y	o	NA
ANK2_MOUSE	Q8C8R3	846	S	2	A	d	ind
ANK2_MOUSE	Q8C8R3	3410	T	1	B	d	isl
ANK2_MOUSE	Q8C8R3	3411	S	1	P	d	isl
ANK2_MOUSE	Q8C8R3	853	T	1	O	d	ind
ANK2_MOUSE	Q8C8R3	400	T	1	P	o	NA
ANK2_MOUSE	Q8C8R3	2399	S	2	P	d	ind
ANK2_MOUSE	Q8C8R3	2913	S	2	P	d	ind
ANK2_MOUSE	Q8C8R3	3427	S	2	A	d	ind
ANK2_MOUSE	Q8C8R3	2364	S	2	P	d	ind
ANK2_MOUSE	Q8C8R3	914	S	1	O	d	isl
ANK2_MOUSE	Q8C8R3	874	S	1	O	d	ind
ANK2_MOUSE	Q8C8R3	2923	S	1	A	d	ind
ANK2_MOUSE	Q8C8R3	2413	S	2	A	d	isl
ANK2_MOUSE	Q8C8R3	2417	S	1	P	d	isl
ANK2_MOUSE	Q8C8R3	2422	S	1	P	d	isl
ANK2_MOUSE	Q8C8R3	890	S	1	A	d	isl
ANK2_MOUSE	Q8C8R3	2427	S	1	A	d	isl
ANK2_MOUSE	Q8C8R3	896	S	1	A	d	isl
ANK2_MOUSE	Q8C8R3	898	S	1	B	d	isl
ANK2_MOUSE	Q8C8R3	901	S	1	B	d	isl
ANK2_MOUSE	Q8C8R3	903	S	1	B	d	isl
ANK2_MOUSE	Q8C8R3	1889	S	2	P	d	ind
ANK2_MOUSE	Q8C8R3	1936	S	1	P	d	ind
ANK2_MOUSE	Q8C8R3	1426	S	2	A	d	isl
ANK2_MOUSE	Q8C8R3	1428	S	2	A	d	isl
ANK2_MOUSE	Q8C8R3	919	S	1	O	d	isl
ANK2_MOUSE	Q8C8R3	2202	T	2	P	d	isl
ANK2_MOUSE	Q8C8R3	2463	S	1	O	d	ind
ANK2_MOUSE	Q8C8R3	1440	S	1	A	d	ind
ANK2_MOUSE	Q8C8R3	2205	T	1	A	d	isl
ANK2_MOUSE	Q8C8R3	2475	S	2	A	d	ind
ANK2_MOUSE	Q8C8R3	2480	S	1	A	d	ind
ANK2_MOUSE	Q8C8R3	3001	S	1	A	d	ind
ANK2_MOUSE	Q8C8R3	1467	S	2	P	d	ind
ANK2_MOUSE	Q8C8R3	3032	S	2	O	d	isl
ANK2_MOUSE	Q8C8R3	3035	T	1	A	d	isl
ANK2_MOUSE	Q8C8R3	3040	T	1	P	d	isl
ANK2_MOUSE	Q8C8R3	3044	T	1	P	d	isl
ANK2_MOUSE	Q8C8R3	3050	T	1	P	d	isl
ANK2_MOUSE	Q8C8R3	3052	T	1	A	d	isl
ANK2_MOUSE	Q8C8R3	3053	S	1	A	d	isl
ANK2_MOUSE	Q8C8R3	2542	T	2	P	d	ind
ANK2_MOUSE	Q8C8R3	3413	T	1	A	d	isl
ANK2_MOUSE	Q8C8R3	2556	T	1	B	d	ind
TNF10_MOUSE	P50592	225	S	1	B	o	NA
TNF10_MOUSE	P50592	223	Y	1	Y	o	NA
TNF10_MOUSE	P50592	224	T	1	O	o	NA
GA2L1_MOUSE	Q8JZP9	361	S	1	O	d	isl
GA2L1_MOUSE	Q8JZP9	355	S	1	A	d	isl
GA2L1_MOUSE	Q8JZP9	292	S	1	P	d	isl
GA2L1_MOUSE	Q8JZP9	358	S	1	O	d	isl
GA2L1_MOUSE	Q8JZP9	482	S	1	P	d	ind
GA2L1_MOUSE	Q8JZP9	297	S	1	P	d	isl
GA2L1_MOUSE	Q8JZP9	394	S	1	P	d	ind
GA2L1_MOUSE	Q8JZP9	290	T	1	B	d	isl
GA2L1_MOUSE	Q8JZP9	493	S	2	P	d	ind
GA2L1_MOUSE	Q8JZP9	654	S	2	B	d	ind
GA2L1_MOUSE	Q8JZP9	306	S	2	P	d	ind
GA2L1_MOUSE	Q8JZP9	436	S	1	B	d	isl
GA2L1_MOUSE	Q8JZP9	438	S	1	B	d	isl
GA2L1_MOUSE	Q8JZP9	25	Y	1	Y	o	NA
GA2L1_MOUSE	Q8JZP9	489	S	1	O	d	ind
GA2L1_MOUSE	Q8JZP9	316	S	1	B	d	ind
GA2L1_MOUSE	Q8JZP9	352	S	2	B	d	isl
KIT_MOUSE	P05532	706	Y	2	Y	o	NA
KIT_MOUSE	P05532	612	Y	1	Y	o	NA
KIT_MOUSE	P05532	581	Y	1	Y	o	NA
KIT_MOUSE	P05532	902	Y	1	Y	o	NA
KIT_MOUSE	P05532	938	Y	2	Y	o	NA
KIT_MOUSE	P05532	939	S	1	O	o	NA
KIT_MOUSE	P05532	748	S	1	B	d	isl
KIT_MOUSE	P05532	749	Y	1	Y	d	isl
KIT_MOUSE	P05532	720	S	1	A	d	isl
KIT_MOUSE	P05532	723	Y	1	Y	d	isl
KIT_MOUSE	P05532	825	Y	3	Y	o	NA
KIT_MOUSE	P05532	571	Y	2	Y	o	NA
KIT_MOUSE	P05532	732	Y	1	Y	d	isl
KIT_MOUSE	P05532	573	Y	2	Y	o	NA
KIT_MOUSE	P05532	731	S	1	O	d	isl
HNRH2_MOUSE	P70333	4	S	1	A	d	ind
HNRH2_MOUSE	P70333	23	S	1	A	o	NA
HNRH2_MOUSE	P70333	392	Y	1	Y	d	isl
HNRH2_MOUSE	P70333	394	S	1	O	d	isl
HNRH2_MOUSE	P70333	272	S	1	A	d	ind
HNRH2_MOUSE	P70333	403	S	1	O	d	isl
HNRH2_MOUSE	P70333	388	S	1	O	d	isl
HNRH2_MOUSE	P70333	406	S	1	O	d	isl
HNRH2_MOUSE	P70333	407	S	1	O	d	isl
HNRH2_MOUSE	P70333	408	Y	1	Y	d	isl
HNRH2_MOUSE	P70333	161	S	1	A	o	NA
HNRH2_MOUSE	P70333	306	Y	1	Y	o	NA
HNRH2_MOUSE	P70333	180	Y	1	Y	o	NA
HNRH2_MOUSE	P70333	310	S	2	P	o	NA
HNRH2_MOUSE	P70333	266	Y	1	Y	d	ind
HNRH2_MOUSE	P70333	186	S	1	O	d	isl
HNRH2_MOUSE	P70333	187	S	1	A	d	isl
HNRH2_MOUSE	P70333	63	S	1	A	d	ind
HNRH2_MOUSE	P70333	77	T	1	B	d	ind
HNRH2_MOUSE	P70333	90	S	1	B	o	NA
HNRH2_MOUSE	P70333	100	T	1	O	o	NA
HNRH2_MOUSE	P70333	104	S	2	P	d	isl
HNRH2_MOUSE	P70333	107	T	1	A	d	isl
HNRH2_MOUSE	P70333	243	Y	1	Y	d	ind
HNRH2_MOUSE	P70333	246	Y	1	Y	d	ind
HNRH2_MOUSE	P70333	384	T	1	O	o	NA
ERGI3_MOUSE	Q9CQE7	202	Y	1	Y	o	NA
ERGI3_MOUSE	Q9CQE7	116	S	1	A	d	ind
UCHL3_MOUSE	Q9JKB1	161	S	1	A	d	ind
UCHL3_MOUSE	Q9JKB1	130	S	2	P	d	isl
UCHL3_MOUSE	Q9JKB1	128	S	1	O	d	isl
SCRIB_MOUSE	Q80U72	1284	S	1	P	d	ind
SCRIB_MOUSE	Q80U72	1541	S	1	O	d	isl
SCRIB_MOUSE	Q80U72	1543	S	2	P	d	isl
SCRIB_MOUSE	Q80U72	962	T	1	O	d	isl
SCRIB_MOUSE	Q80U72	1292	S	2	P	d	ind
SCRIB_MOUSE	Q80U72	675	T	2	A	d	isl
SCRIB_MOUSE	Q80U72	1561	S	1	P	d	isl
SCRIB_MOUSE	Q80U72	820	Y	1	Y	d	isl
SCRIB_MOUSE	Q80U72	1563	S	1	P	d	isl
SCRIB_MOUSE	Q80U72	925	S	2	P	d	isl
SCRIB_MOUSE	Q80U72	1566	S	1	A	d	isl
SCRIB_MOUSE	Q80U72	674	T	2	A	d	isl
SCRIB_MOUSE	Q80U72	35	S	1	O	o	NA
SCRIB_MOUSE	Q80U72	37	S	1	A	o	NA
SCRIB_MOUSE	Q80U72	936	T	1	O	d	isl
SCRIB_MOUSE	Q80U72	939	T	1	O	d	isl
SCRIB_MOUSE	Q80U72	812	T	1	P	d	isl
SCRIB_MOUSE	Q80U72	1325	T	1	P	d	ind
SCRIB_MOUSE	Q80U72	943	S	1	P	d	isl
SCRIB_MOUSE	Q80U72	1457	S	2	P	d	ind
SCRIB_MOUSE	Q80U72	434	S	1	A	d	ind
SCRIB_MOUSE	Q80U72	1331	S	1	P	d	ind
SCRIB_MOUSE	Q80U72	948	S	1	O	d	isl
SCRIB_MOUSE	Q80U72	821	S	1	P	d	isl
SCRIB_MOUSE	Q80U72	1206	S	2	A	d	isl
SCRIB_MOUSE	Q80U72	1336	S	1	A	d	ind
SCRIB_MOUSE	Q80U72	1209	S	1	O	d	isl
SCRIB_MOUSE	Q80U72	955	T	1	O	d	isl
SCRIB_MOUSE	Q80U72	1212	S	1	A	d	isl
SCRIB_MOUSE	Q80U72	959	T	1	O	d	isl
SCRIB_MOUSE	Q80U72	961	S	1	O	d	isl
SCRIB_MOUSE	Q80U72	1218	S	1	P	d	isl
SCRIB_MOUSE	Q80U72	1548	S	2	P	d	isl
SCRIB_MOUSE	Q80U72	1527	T	1	P	d	isl
SCRIB_MOUSE	Q80U72	583	S	2	A	d	ind
SCRIB_MOUSE	Q80U72	1100	S	1	O	d	ind
SCRIB_MOUSE	Q80U72	974	S	1	P	d	isl
SCRIB_MOUSE	Q80U72	976	S	1	O	d	isl
SCRIB_MOUSE	Q80U72	1361	S	2	B	d	ind
SCRIB_MOUSE	Q80U72	1490	S	2	B	d	ind
SCRIB_MOUSE	Q80U72	986	Y	1	Y	d	isl
SCRIB_MOUSE	Q80U72	475	T	1	P	d	ind
SCRIB_MOUSE	Q80U72	606	T	1	P	d	ind
SCRIB_MOUSE	Q80U72	479	S	1	A	d	ind
SCRIB_MOUSE	Q80U72	1505	S	1	A	d	ind
SCRIB_MOUSE	Q80U72	1468	S	1	P	d	ind
SCRIB_MOUSE	Q80U72	1126	S	1	P	o	NA
SCRIB_MOUSE	Q80U72	750	S	1	A	d	ind
SCRIB_MOUSE	Q80U72	1265	S	1	O	d	ind
SCRIB_MOUSE	Q80U72	1523	S	1	P	d	isl
SCRIB_MOUSE	Q80U72	503	S	1	P	d	isl
SCRIB_MOUSE	Q80U72	1529	S	2	P	d	isl
SCRIB_MOUSE	Q80U72	506	S	1	P	d	isl
SCRIB_MOUSE	Q80U72	1531	T	1	P	d	isl
SCRIB_MOUSE	Q80U72	508	S	1	A	d	isl
CYTIP_MOUSE	Q91VY6	66	S	1	B	d	ind
MED18_MOUSE	Q9CZ82	66	S	1	P	o	NA
CC178_MOUSE	Q8CDV0	546	T	1	A	o	NA
XRCC5_MOUSE	P27641	578	S	2	O	d	isl
XRCC5_MOUSE	P27641	592	S	1	B	o	NA
XRCC5_MOUSE	P27641	581	S	2	A	d	isl
XRCC5_MOUSE	P27641	716	T	2	B	d	ind
XRCC5_MOUSE	P27641	528	S	1	P	d	ind
KCC2G_MOUSE	Q923T9	231	Y	1	Y	o	NA
KCC2G_MOUSE	Q923T9	36	S	1	B	o	NA
KCC2G_MOUSE	Q923T9	325	S	1	A	d	isl
KCC2G_MOUSE	Q923T9	375	T	1	A	d	isl
KCC2G_MOUSE	Q923T9	455	S	1	O	o	NA
KCC2G_MOUSE	Q923T9	235	S	2	P	o	NA
KCC2G_MOUSE	Q923T9	37	T	1	B	o	NA
KCC2G_MOUSE	Q923T9	79	S	1	A	o	NA
KCC2G_MOUSE	Q923T9	146	S	1	O	o	NA
KCC2G_MOUSE	Q923T9	307	T	1	O	d	isl
KCC2G_MOUSE	Q923T9	276	S	1	O	o	NA
KCC2G_MOUSE	Q923T9	287	T	4	B	o	NA
KCC2G_MOUSE	Q923T9	311	S	2	O	d	isl
KCC2G_MOUSE	Q923T9	280	S	1	O	o	NA
KCC2G_MOUSE	Q923T9	26	S	2	O	o	NA
KCC2G_MOUSE	Q923T9	315	S	1	B	d	isl
KCC2G_MOUSE	Q923T9	381	S	1	A	d	isl
KCC2G_MOUSE	Q923T9	254	T	1	O	o	NA
KCC2G_MOUSE	Q923T9	319	S	1	O	d	isl
KCC2G_MOUSE	Q923T9	384	S	1	O	d	isl
SPRY4_MOUSE	Q91WK1	133	S	1	B	o	NA
SO4A1_MOUSE	Q8K078	35	S	1	O	d	isl
SO4A1_MOUSE	Q8K078	36	S	1	O	d	isl
SO4A1_MOUSE	Q8K078	39	S	1	P	d	isl
SO4A1_MOUSE	Q8K078	42	S	1	O	d	isl
SO4A1_MOUSE	Q8K078	75	Y	1	Y	d	ind
SO4A1_MOUSE	Q8K078	45	S	1	O	d	isl
SO4A1_MOUSE	Q8K078	67	S	2	B	d	ind
SO4A1_MOUSE	Q8K078	49	T	1	O	d	isl
SO4A1_MOUSE	Q8K078	52	S	1	O	d	isl
SO4A1_MOUSE	Q8K078	53	S	1	O	d	isl
SO4A1_MOUSE	Q8K078	54	S	1	O	d	isl
SO4A1_MOUSE	Q8K078	533	Y	1	Y	o	NA
SO4A1_MOUSE	Q8K078	28	S	1	A	d	isl
SO4A1_MOUSE	Q8K078	32	T	1	P	d	isl
RPP38_MOUSE	Q80UU2	274	S	1	B	d	isl
RPP38_MOUSE	Q80UU2	277	S	1	B	d	isl
LNEBL_MOUSE	Q9DC07	68	T	1	P	d	ind
LNEBL_MOUSE	Q9DC07	198	T	1	O	d	isl
LNEBL_MOUSE	Q9DC07	199	S	1	O	d	isl
LNEBL_MOUSE	Q9DC07	52	Y	1	Y	o	NA
LNEBL_MOUSE	Q9DC07	150	T	1	B	d	ind
LNEBL_MOUSE	Q9DC07	24	Y	1	Y	o	NA
LNEBL_MOUSE	Q9DC07	57	Y	1	Y	o	NA
LNEBL_MOUSE	Q9DC07	135	T	1	P	d	ind
LNEBL_MOUSE	Q9DC07	230	S	1	A	o	NA
NECT3_MOUSE	Q9JLB9	529	S	2	A	d	ind
NECT3_MOUSE	Q9JLB9	332	Y	1	Y	o	NA
NECT3_MOUSE	Q9JLB9	510	Y	1	Y	o	NA
NECT3_MOUSE	Q9JLB9	465	S	1	A	d	ind
NECT3_MOUSE	Q9JLB9	318	S	1	A	o	NA
NECT3_MOUSE	Q9JLB9	511	Y	1	Y	o	NA
OASL2_MOUSE	Q9Z2F2	182	S	1	O	o	NA
ACSL5_MOUSE	Q8JZR0	69	Y	1	Y	o	NA
ACSL5_MOUSE	Q8JZR0	359	Y	1	Y	o	NA
ACSL5_MOUSE	Q8JZR0	680	S	1	A	d	ind
ACSL5_MOUSE	Q8JZR0	368	T	1	P	o	NA
ACSL5_MOUSE	Q8JZR0	634	S	1	A	d	ind
ACSL5_MOUSE	Q8JZR0	96	Y	1	Y	o	NA
HFM1_MOUSE	D3Z4R1	761	S	1	A	o	NA
HFM1_MOUSE	D3Z4R1	612	S	1	O	o	NA
HFM1_MOUSE	D3Z4R1	613	T	1	O	o	NA
HFM1_MOUSE	D3Z4R1	760	S	1	B	o	NA
FBP1L_MOUSE	Q8K012	98	Y	1	Y	o	NA
FBP1L_MOUSE	Q8K012	291	Y	1	Y	d	isl
FBP1L_MOUSE	Q8K012	295	S	2	B	d	isl
FBP1L_MOUSE	Q8K012	488	S	2	B	d	isl
FBP1L_MOUSE	Q8K012	489	S	1	B	d	isl
FBP1L_MOUSE	Q8K012	298	T	1	O	d	isl
FBP1L_MOUSE	Q8K012	525	S	1	A	d	ind
FBP1L_MOUSE	Q8K012	496	T	1	O	d	isl
FBP1L_MOUSE	Q8K012	501	S	2	P	d	isl
FBP1L_MOUSE	Q8K012	506	Y	1	Y	d	isl
FBP1L_MOUSE	Q8K012	505	S	2	A	d	isl
FBP1L_MOUSE	Q8K012	245	S	1	O	o	NA
ATPO_MOUSE	Q9DB20	35	Y	1	Y	o	NA
ATPO_MOUSE	Q9DB20	166	S	1	P	o	NA
ATPO_MOUSE	Q9DB20	75	S	1	B	o	NA
ATPO_MOUSE	Q9DB20	147	S	1	P	o	NA
ATPO_MOUSE	Q9DB20	155	S	1	A	o	NA
ATPO_MOUSE	Q9DB20	126	S	1	O	o	NA
CLPX_MOUSE	Q9JHS4	97	S	1	O	d	isl
CLPX_MOUSE	Q9JHS4	616	Y	1	Y	d	isl
CLPX_MOUSE	Q9JHS4	618	S	1	A	d	isl
CLPX_MOUSE	Q9JHS4	174	Y	1	Y	o	NA
CLPX_MOUSE	Q9JHS4	176	Y	1	Y	o	NA
CLPX_MOUSE	Q9JHS4	530	Y	1	Y	o	NA
CLPX_MOUSE	Q9JHS4	180	Y	1	Y	o	NA
CLPX_MOUSE	Q9JHS4	279	S	1	A	d	ind
CLPX_MOUSE	Q9JHS4	92	S	1	B	d	isl
CLPX_MOUSE	Q9JHS4	94	S	1	B	d	isl
SUCO_MOUSE	Q8C341	1222	S	1	B	d	ind
SUCO_MOUSE	Q8C341	1225	S	1	A	o	NA
SUCO_MOUSE	Q8C341	1099	S	1	P	d	ind
SUCO_MOUSE	Q8C341	1068	T	1	B	d	isl
SUCO_MOUSE	Q8C341	1069	S	1	B	d	isl
SUCO_MOUSE	Q8C341	1077	S	1	B	d	ind
SUCO_MOUSE	Q8C341	662	S	1	O	d	ind
KLH29_MOUSE	Q80T74	93	T	1	O	d	isl
KLH29_MOUSE	Q80T74	94	T	1	O	d	isl
BICL2_MOUSE	Q8CHW5	36	S	1	B	d	ind
BICL2_MOUSE	Q8CHW5	277	S	1	B	d	ind
BICL2_MOUSE	Q8CHW5	350	S	1	B	d	ind
BC11B_MOUSE	Q99PV8	260	T	2	P	d	ind
BC11B_MOUSE	Q99PV8	778	S	1	A	d	isl
BC11B_MOUSE	Q99PV8	779	S	1	B	d	isl
BC11B_MOUSE	Q99PV8	13	S	1	A	d	ind
BC11B_MOUSE	Q99PV8	398	S	1	P	d	isl
BC11B_MOUSE	Q99PV8	401	S	2	P	d	isl
BC11B_MOUSE	Q99PV8	277	S	1	P	d	ind
BC11B_MOUSE	Q99PV8	406	T	2	P	d	isl
BC11B_MOUSE	Q99PV8	664	S	1	P	d	ind
BC11B_MOUSE	Q99PV8	416	T	2	P	d	ind
BC11B_MOUSE	Q99PV8	552	S	1	O	d	isl
BC11B_MOUSE	Q99PV8	169	S	1	P	d	ind
BC11B_MOUSE	Q99PV8	554	S	1	A	d	isl
BC11B_MOUSE	Q99PV8	557	S	1	A	d	isl
BC11B_MOUSE	Q99PV8	313	T	1	P	d	ind
BC11B_MOUSE	Q99PV8	318	S	1	P	d	ind
BC11B_MOUSE	Q99PV8	449	T	1	B	d	ind
BC11B_MOUSE	Q99PV8	725	S	1	P	d	isl
BC11B_MOUSE	Q99PV8	762	S	2	O	d	isl
BC11B_MOUSE	Q99PV8	731	S	1	A	d	isl
BC11B_MOUSE	Q99PV8	734	S	1	A	d	isl
BC11B_MOUSE	Q99PV8	95	S	3	B	d	isl
BC11B_MOUSE	Q99PV8	96	S	4	P	d	isl
BC11B_MOUSE	Q99PV8	785	S	1	A	d	isl
BC11B_MOUSE	Q99PV8	358	S	1	P	d	ind
BC11B_MOUSE	Q99PV8	743	S	1	O	d	isl
BC11B_MOUSE	Q99PV8	744	T	2	P	d	isl
BC11B_MOUSE	Q99PV8	765	S	1	O	d	isl
BC11B_MOUSE	Q99PV8	109	S	2	B	d	ind
BC11B_MOUSE	Q99PV8	495	S	2	A	d	isl
BC11B_MOUSE	Q99PV8	496	S	2	P	d	isl
BC11B_MOUSE	Q99PV8	884	S	1	O	d	ind
BC11B_MOUSE	Q99PV8	376	T	2	P	d	ind
BC11B_MOUSE	Q99PV8	405	S	1	O	d	isl
BC11B_MOUSE	Q99PV8	381	S	2	P	d	ind
BC11B_MOUSE	Q99PV8	766	T	1	P	d	isl
BC11B_MOUSE	Q99PV8	128	S	2	P	d	ind
RCBT2_MOUSE	Q99LJ7	541	S	1	O	o	NA
RCBT2_MOUSE	Q99LJ7	544	S	1	O	o	NA
TLE1_MOUSE	Q62440	9	T	1	P	d	ind
TLE1_MOUSE	Q62440	242	S	1	A	d	ind
TLE1_MOUSE	Q62440	284	S	2	P	d	isl
TLE1_MOUSE	Q62440	310	T	1	P	d	ind
TLE1_MOUSE	Q62440	282	S	1	B	d	isl
MIER3_MOUSE	Q3UHF3	163	T	2	A	d	isl
MIER3_MOUSE	Q3UHF3	165	S	1	O	d	isl
MIER3_MOUSE	Q3UHF3	168	S	2	P	d	isl
MIER3_MOUSE	Q3UHF3	114	S	2	A	d	ind
MIER3_MOUSE	Q3UHF3	52	S	1	B	d	isl
MIER3_MOUSE	Q3UHF3	53	S	1	A	d	isl
MIER3_MOUSE	Q3UHF3	156	S	2	A	d	ind
PIMRE_MOUSE	Q8BFY7	72	S	2	P	d	ind
PIMRE_MOUSE	Q8BFY7	16	S	2	B	d	ind
PIMRE_MOUSE	Q8BFY7	58	S	1	B	d	ind
PIMRE_MOUSE	Q8BFY7	189	S	1	A	d	isl
PIMRE_MOUSE	Q8BFY7	191	S	1	A	d	isl
PIMRE_MOUSE	Q8BFY7	128	S	1	P	d	ind
EX3L1_MOUSE	Q8BI71	710	S	1	P	d	ind
CDS1_MOUSE	P98191	33	T	1	A	d	isl
CDS1_MOUSE	P98191	41	T	1	A	d	isl
CDS1_MOUSE	P98191	35	S	1	A	d	isl
CDS1_MOUSE	P98191	37	S	2	A	d	isl
CDS1_MOUSE	P98191	56	S	1	B	d	ind
MTMRA_MOUSE	Q7TPM9	577	S	1	B	d	ind
MTMRA_MOUSE	Q7TPM9	745	S	1	B	o	NA
MTMRA_MOUSE	Q7TPM9	10	S	1	B	d	ind
MTMRA_MOUSE	Q7TPM9	766	T	1	O	o	NA
MTMRA_MOUSE	Q7TPM9	603	S	1	B	d	ind
MTMRA_MOUSE	Q7TPM9	764	T	1	A	o	NA
MTMRA_MOUSE	Q7TPM9	763	S	1	A	o	NA
MTMRA_MOUSE	Q7TPM9	704	Y	1	Y	o	NA
NR2F6_MOUSE	P43136	41	S	2	A	d	isl
NR2F6_MOUSE	P43136	90	S	1	B	d	ind
NR2F6_MOUSE	P43136	35	S	2	P	d	isl
NR2F6_MOUSE	P43136	40	T	1	A	d	isl
RAE1B_MOUSE	O08603	201	S	1	A	d	isl
RAE1B_MOUSE	O08603	221	S	1	P	d	isl
RAE1B_MOUSE	O08603	215	T	1	O	d	isl
RAE1B_MOUSE	O08603	207	S	1	B	d	isl
SAR1B_MOUSE	Q9CQC9	89	Y	1	Y	o	NA
SPO11_MOUSE	Q9WTK8	377	S	1	A	o	NA
SPO11_MOUSE	Q9WTK8	378	S	1	A	o	NA
SPO11_MOUSE	Q9WTK8	364	S	1	O	d	ind
SPO11_MOUSE	Q9WTK8	374	T	1	O	o	NA
SPO11_MOUSE	Q9WTK8	380	Y	1	Y	o	NA
TRI16_MOUSE	Q99PP9	251	S	1	A	d	ind
TRI16_MOUSE	Q99PP9	523	Y	1	Y	o	NA
PGTA_MOUSE	Q9JHK4	10	S	1	A	d	ind
PGTA_MOUSE	Q9JHK4	98	S	2	O	o	NA
MBTP1_MOUSE	Q9WTZ2	307	S	1	O	o	NA
MBTP1_MOUSE	Q9WTZ2	158	S	1	B	d	ind
GMFG_MOUSE	Q9ERL7	125	T	1	A	o	NA
DNER_MOUSE	Q8JZM4	711	Y	1	Y	o	NA
DNER_MOUSE	Q8JZM4	714	T	2	P	o	NA
DNER_MOUSE	Q8JZM4	685	S	1	A	o	NA
DNER_MOUSE	Q8JZM4	721	Y	2	Y	d	isl
DNER_MOUSE	Q8JZM4	722	S	2	P	d	isl
DNER_MOUSE	Q8JZM4	696	S	1	O	o	NA
TOM1_MOUSE	O88746	481	T	1	B	d	isl
TOM1_MOUSE	O88746	386	Y	1	Y	d	ind
TOM1_MOUSE	O88746	355	S	1	A	d	ind
TOM1_MOUSE	O88746	164	T	2	P	d	isl
TOM1_MOUSE	O88746	213	T	1	P	d	isl
TOM1_MOUSE	O88746	200	T	1	P	d	ind
TOM1_MOUSE	O88746	472	S	1	P	d	isl
TOM1_MOUSE	O88746	464	S	1	A	d	isl
TOM1_MOUSE	O88746	462	S	1	P	d	isl
TOM1_MOUSE	O88746	176	S	2	O	d	isl
TOM1_MOUSE	O88746	174	T	2	P	d	isl
TOM1_MOUSE	O88746	211	T	1	P	d	isl
TOM1_MOUSE	O88746	180	S	2	B	d	isl
TOM1_MOUSE	O88746	405	S	1	B	d	ind
TOM1_MOUSE	O88746	182	S	1	O	d	isl
TOM1_MOUSE	O88746	183	S	1	O	d	isl
TOM1_MOUSE	O88746	376	S	1	B	d	ind
TOM1_MOUSE	O88746	154	T	1	A	o	NA
TOM1_MOUSE	O88746	475	T	1	O	d	isl
TOM1_MOUSE	O88746	208	S	2	P	d	isl
TOM1_MOUSE	O88746	160	S	2	P	d	isl
NAA15_MOUSE	Q80UM3	280	Y	1	Y	o	NA
NAA15_MOUSE	Q80UM3	855	S	2	A	d	isl
NAA15_MOUSE	Q80UM3	588	S	1	A	d	ind
NAA15_MOUSE	Q80UM3	758	S	1	B	d	ind
NAA15_MOUSE	Q80UM3	215	T	1	A	o	NA
NAA15_MOUSE	Q80UM3	216	Y	1	Y	o	NA
NAA15_MOUSE	Q80UM3	574	T	1	A	d	ind
NAA15_MOUSE	Q80UM3	86	Y	1	Y	o	NA
NAA15_MOUSE	Q80UM3	854	S	2	A	d	isl
INT6L_MOUSE	Q8BND4	626	S	1	B	d	isl
INT6L_MOUSE	Q8BND4	628	S	1	B	d	isl
RHG12_MOUSE	Q8C0D4	513	T	2	A	d	ind
RHG12_MOUSE	Q8C0D4	260	S	1	P	d	ind
RHG12_MOUSE	Q8C0D4	401	S	1	B	d	isl
RHG12_MOUSE	Q8C0D4	403	S	1	B	d	isl
RHG12_MOUSE	Q8C0D4	163	S	1	P	d	ind
RHG12_MOUSE	Q8C0D4	420	S	1	B	d	isl
RHG12_MOUSE	Q8C0D4	421	T	1	B	d	isl
RHG12_MOUSE	Q8C0D4	444	S	1	P	d	ind
RHG12_MOUSE	Q8C0D4	196	S	1	A	d	isl
RHG12_MOUSE	Q8C0D4	581	T	1	P	d	isl
RHG12_MOUSE	Q8C0D4	199	S	2	A	d	isl
RHG12_MOUSE	Q8C0D4	584	S	2	P	d	isl
RHG12_MOUSE	Q8C0D4	204	S	2	A	d	isl
RHG12_MOUSE	Q8C0D4	211	S	2	A	d	isl
RHG12_MOUSE	Q8C0D4	356	Y	1	Y	d	isl
RHG12_MOUSE	Q8C0D4	213	S	2	A	d	isl
RHG12_MOUSE	Q8C0D4	229	T	2	P	d	isl
RHG12_MOUSE	Q8C0D4	352	Y	1	Y	d	isl
RHG12_MOUSE	Q8C0D4	228	T	1	O	d	isl
RHG12_MOUSE	Q8C0D4	101	S	1	A	d	isl
RHG12_MOUSE	Q8C0D4	102	T	1	A	d	isl
RHG12_MOUSE	Q8C0D4	238	S	2	P	d	isl
RHG12_MOUSE	Q8C0D4	241	Y	2	Y	d	isl
RHG12_MOUSE	Q8C0D4	373	Y	1	Y	d	ind
RHG12_MOUSE	Q8C0D4	631	T	1	B	d	ind
MAG_MOUSE	P20917	547	S	1	O	d	isl
MAG_MOUSE	P20917	549	S	1	A	d	isl
MAG_MOUSE	P20917	590	S	2	P	d	ind
TMM33_MOUSE	Q9CR67	235	S	1	B	o	NA
TMM33_MOUSE	Q9CR67	245	T	1	O	d	ind
TMM33_MOUSE	Q9CR67	240	S	1	O	o	NA
TANC2_MOUSE	A2A690	1538	S	1	P	d	ind
TANC2_MOUSE	A2A690	1923	Y	1	Y	o	NA
TANC2_MOUSE	A2A690	11	T	1	O	d	isl
TANC2_MOUSE	A2A690	1549	S	1	P	d	ind
TANC2_MOUSE	A2A690	15	S	1	O	d	isl
TANC2_MOUSE	A2A690	400	S	1	P	d	isl
TANC2_MOUSE	A2A690	1556	S	1	O	d	ind
TANC2_MOUSE	A2A690	22	S	1	A	d	isl
TANC2_MOUSE	A2A690	1564	S	1	P	d	ind
TANC2_MOUSE	A2A690	1828	S	2	P	d	isl
TANC2_MOUSE	A2A690	1446	S	1	P	d	ind
TANC2_MOUSE	A2A690	1831	S	2	P	d	isl
TANC2_MOUSE	A2A690	434	T	1	P	d	isl
TANC2_MOUSE	A2A690	169	S	1	P	d	isl
TANC2_MOUSE	A2A690	171	T	1	O	d	isl
TANC2_MOUSE	A2A690	173	T	1	A	d	isl
TANC2_MOUSE	A2A690	430	S	1	O	d	isl
TANC2_MOUSE	A2A690	1583	S	2	P	d	ind
TANC2_MOUSE	A2A690	1586	S	1	B	d	ind
TANC2_MOUSE	A2A690	1972	S	1	B	d	isl
TANC2_MOUSE	A2A690	1461	S	1	O	d	isl
TANC2_MOUSE	A2A690	1462	S	1	P	d	isl
TANC2_MOUSE	A2A690	1466	S	1	O	d	isl
TANC2_MOUSE	A2A690	1980	T	1	O	d	isl
TANC2_MOUSE	A2A690	1981	S	1	P	d	isl
TANC2_MOUSE	A2A690	1726	S	1	B	d	ind
TANC2_MOUSE	A2A690	1480	S	1	P	d	isl
TANC2_MOUSE	A2A690	1482	T	1	O	d	isl
TANC2_MOUSE	A2A690	1744	S	1	B	d	ind
TANC2_MOUSE	A2A690	1748	S	1	P	d	ind
TANC2_MOUSE	A2A690	1637	Y	1	Y	d	ind
TANC2_MOUSE	A2A690	1521	S	1	P	d	ind
TANC2_MOUSE	A2A690	425	S	1	O	d	isl
TANC2_MOUSE	A2A690	404	S	1	P	d	isl
TANC2_MOUSE	A2A690	1658	S	1	O	d	isl
TANC2_MOUSE	A2A690	1660	S	1	O	d	isl
TANC2_MOUSE	A2A690	1534	S	1	P	d	ind
TBX6_MOUSE	P70327	383	S	1	O	d	ind
RASM_MOUSE	O08989	84	T	1	A	o	NA
IRF2_MOUSE	P23906	109	Y	1	Y	d	ind
BCL7B_MOUSE	Q921K9	107	S	1	B	d	isl
BCL7B_MOUSE	Q921K9	152	S	1	A	d	isl
BCL7B_MOUSE	Q921K9	111	S	1	O	d	isl
BCL7B_MOUSE	Q921K9	112	S	1	P	d	isl
BCL7B_MOUSE	Q921K9	114	S	2	P	d	isl
BCL7B_MOUSE	Q921K9	148	S	1	O	d	isl
BCL7B_MOUSE	Q921K9	118	S	2	A	d	isl
BCL7B_MOUSE	Q921K9	120	S	2	O	d	isl
BCL7B_MOUSE	Q921K9	122	S	2	P	d	isl
BCL7B_MOUSE	Q921K9	127	S	2	A	d	isl
ARH_MOUSE	Q8C142	194	T	1	A	d	isl
ARH_MOUSE	Q8C142	198	S	1	B	d	isl
ARH_MOUSE	Q8C142	199	T	1	P	d	isl
ARH_MOUSE	Q8C142	201	S	2	B	d	isl
ARH_MOUSE	Q8C142	14	S	1	P	d	isl
ARH_MOUSE	Q8C142	16	S	1	B	d	isl
FGD1_MOUSE	P52734	98	S	1	O	d	isl
FGD1_MOUSE	P52734	620	Y	1	Y	o	NA
FGD1_MOUSE	P52734	710	T	2	P	d	isl
FGD1_MOUSE	P52734	135	S	1	B	d	ind
FGD1_MOUSE	P52734	808	S	1	B	d	ind
FGD1_MOUSE	P52734	714	S	2	P	d	isl
FGD1_MOUSE	P52734	364	S	1	B	d	ind
FGD1_MOUSE	P52734	205	S	1	O	d	ind
FGD1_MOUSE	P52734	815	S	1	B	o	NA
FGD1_MOUSE	P52734	82	S	1	P	d	isl
FGD1_MOUSE	P52734	141	T	1	A	d	ind
FGD1_MOUSE	P52734	116	S	1	B	d	ind
FGD1_MOUSE	P52734	725	T	1	P	d	ind
FGD1_MOUSE	P52734	92	S	1	B	d	isl
FGD1_MOUSE	P52734	93	Y	1	Y	d	isl
ECHM_MOUSE	Q8BH95	46	S	1	B	o	NA
AKP13_MOUSE	E9Q394	386	S	1	A	d	isl
AKP13_MOUSE	E9Q394	2308	S	1	A	d	ind
AKP13_MOUSE	E9Q394	1541	S	1	A	d	ind
AKP13_MOUSE	E9Q394	390	S	1	O	d	isl
AKP13_MOUSE	E9Q394	392	S	1	O	d	isl
AKP13_MOUSE	E9Q394	2697	S	1	B	d	isl
AKP13_MOUSE	E9Q394	487	T	1	P	d	ind
AKP13_MOUSE	E9Q394	2692	S	2	P	d	isl
AKP13_MOUSE	E9Q394	1839	S	2	B	d	ind
AKP13_MOUSE	E9Q394	2073	Y	1	Y	o	NA
AKP13_MOUSE	E9Q394	1989	T	1	A	o	NA
AKP13_MOUSE	E9Q394	1819	S	1	O	d	isl
AKP13_MOUSE	E9Q394	1820	S	1	O	d	isl
AKP13_MOUSE	E9Q394	2462	S	1	B	d	ind
AKP13_MOUSE	E9Q394	1569	S	1	B	d	ind
AKP13_MOUSE	E9Q394	1479	S	1	P	d	ind
AKP13_MOUSE	E9Q394	941	T	2	P	d	ind
AKP13_MOUSE	E9Q394	2350	T	1	B	d	ind
AKP13_MOUSE	E9Q394	1455	S	1	A	d	ind
AKP13_MOUSE	E9Q394	1713	S	1	B	d	ind
AKP13_MOUSE	E9Q394	1908	S	1	A	d	ind
AKP13_MOUSE	E9Q394	2527	S	2	B	d	isl
AKP13_MOUSE	E9Q394	578	T	1	A	d	isl
AKP13_MOUSE	E9Q394	2361	S	2	P	d	isl
AKP13_MOUSE	E9Q394	2363	T	1	O	d	isl
AKP13_MOUSE	E9Q394	1342	T	1	P	d	ind
AKP13_MOUSE	E9Q394	1473	S	1	B	d	ind
AKP13_MOUSE	E9Q394	1218	S	1	B	d	ind
AKP13_MOUSE	E9Q394	579	S	1	A	d	isl
AKP13_MOUSE	E9Q394	2684	S	1	B	d	isl
AKP13_MOUSE	E9Q394	1861	S	1	B	d	ind
AKP13_MOUSE	E9Q394	2374	T	1	B	d	ind
AKP13_MOUSE	E9Q394	583	S	1	P	d	isl
AKP13_MOUSE	E9Q394	1608	S	2	O	d	isl
AKP13_MOUSE	E9Q394	1869	S	1	B	d	ind
AKP13_MOUSE	E9Q394	1611	S	2	A	d	isl
AKP13_MOUSE	E9Q394	1613	S	2	A	d	isl
AKP13_MOUSE	E9Q394	2531	S	1	B	d	isl
AKP13_MOUSE	E9Q394	868	S	1	P	d	isl
AKP13_MOUSE	E9Q394	856	S	1	P	d	ind
AKP13_MOUSE	E9Q394	1893	T	1	A	d	isl
AKP13_MOUSE	E9Q394	1892	S	2	A	d	isl
AKP13_MOUSE	E9Q394	2525	S	1	B	d	isl
AKP13_MOUSE	E9Q394	1858	S	1	B	d	ind
AKP13_MOUSE	E9Q394	870	T	1	O	d	isl
AKP13_MOUSE	E9Q394	2530	S	2	B	d	isl
AKP13_MOUSE	E9Q394	867	S	1	O	d	isl
AKP13_MOUSE	E9Q394	484	S	1	O	d	ind
AKP13_MOUSE	E9Q394	1253	S	1	P	d	ind
AKP13_MOUSE	E9Q394	1895	S	2	O	d	isl
AKP13_MOUSE	E9Q394	999	S	1	O	d	ind
AKP13_MOUSE	E9Q394	1256	T	1	O	d	ind
AKP13_MOUSE	E9Q394	2663	S	1	B	d	ind
AKP13_MOUSE	E9Q394	2668	S	1	A	d	ind
AKP13_MOUSE	E9Q394	2431	T	1	B	d	ind
AKP13_MOUSE	E9Q394	1524	S	1	B	d	isl
AKP13_MOUSE	E9Q394	1526	S	1	P	d	isl
AKP13_MOUSE	E9Q394	2690	S	1	O	d	isl
AKP13_MOUSE	E9Q394	1532	S	1	B	d	isl
AKP13_MOUSE	E9Q394	2687	S	1	A	d	isl
UEVLD_MOUSE	Q3U1V6	365	S	1	P	d	ind
UEVLD_MOUSE	Q3U1V6	216	S	1	A	o	NA
ACOT6_MOUSE	Q32Q92	52	Y	1	Y	o	NA
ACOT6_MOUSE	Q32Q92	56	S	1	B	d	ind
HNF1A_MOUSE	P22361	311	T	1	O	d	isl
HNF1A_MOUSE	P22361	70	S	2	A	d	isl
HNF1A_MOUSE	P22361	74	T	2	A	d	isl
HNF1A_MOUSE	P22361	303	S	1	O	d	isl
HNF1A_MOUSE	P22361	247	S	2	P	d	ind
HNF1A_MOUSE	P22361	313	S	2	P	d	isl
HNF1A_MOUSE	P22361	315	S	1	O	d	isl
HNF1A_MOUSE	P22361	93	S	1	P	d	ind
EYA1_MOUSE	P97767	313	S	1	P	d	ind
CLIC1_MOUSE	Q9Z1Q5	103	S	1	O	d	ind
CLIC1_MOUSE	Q9Z1Q5	233	Y	2	Y	o	NA
CLIC1_MOUSE	Q9Z1Q5	146	S	1	P	d	ind
CLIC1_MOUSE	Q9Z1Q5	211	S	1	B	o	NA
CLIC1_MOUSE	Q9Z1Q5	121	S	1	O	o	NA
CLIC1_MOUSE	Q9Z1Q5	156	S	1	A	d	ind
CLIC1_MOUSE	Q9Z1Q5	93	Y	1	Y	o	NA
POLI_MOUSE	Q6R3M4	553	S	1	O	d	isl
POLI_MOUSE	Q6R3M4	556	S	1	P	d	isl
POLI_MOUSE	Q6R3M4	469	S	1	B	d	ind
MUTA_MOUSE	P16332	144	Y	1	Y	d	ind
RFX8_MOUSE	D3YU81	91	Y	1	Y	o	NA
RFX8_MOUSE	D3YU81	85	Y	1	Y	o	NA
CP4B1_MOUSE	Q64462	509	S	1	O	d	ind
CP4B1_MOUSE	Q64462	31	S	1	B	o	NA
CP4B1_MOUSE	Q64462	7	S	1	P	d	ind
CAN9_MOUSE	Q9D805	362	S	1	O	o	NA
CAN9_MOUSE	Q9D805	3	Y	1	Y	d	isl
CAN9_MOUSE	Q9D805	7	S	1	O	d	isl
CES1D_MOUSE	Q8VCT4	401	Y	1	Y	o	NA
TT39B_MOUSE	Q8BYY4	205	S	1	B	o	NA
TT39B_MOUSE	Q8BYY4	27	S	1	P	d	isl
TT39B_MOUSE	Q8BYY4	204	T	1	B	o	NA
TT39B_MOUSE	Q8BYY4	29	S	2	B	d	isl
TT39B_MOUSE	Q8BYY4	47	S	1	B	d	ind
KDM5D_MOUSE	Q62240	1082	S	1	B	d	ind
KDM5D_MOUSE	Q62240	239	Y	1	Y	d	ind
KDM5D_MOUSE	Q62240	1471	T	1	A	d	ind
KDM5D_MOUSE	Q62240	151	S	1	O	o	NA
KDM5D_MOUSE	Q62240	143	Y	1	Y	o	NA
TBB4B_MOUSE	P68372	386	T	1	O	o	NA
TBB4B_MOUSE	P68372	274	T	1	O	o	NA
TBB4B_MOUSE	P68372	275	S	1	O	o	NA
TBB4B_MOUSE	P68372	278	S	1	O	o	NA
TBB4B_MOUSE	P68372	285	T	1	B	o	NA
TBB4B_MOUSE	P68372	36	Y	1	Y	d	isl
TBB4B_MOUSE	P68372	40	S	1	A	d	isl
TBB4B_MOUSE	P68372	172	S	1	P	d	ind
TBB4B_MOUSE	P68372	50	Y	1	Y	o	NA
TBB4B_MOUSE	P68372	51	Y	1	Y	o	NA
TBB4B_MOUSE	P68372	55	T	1	O	o	NA
TBB4B_MOUSE	P68372	312	T	1	B	o	NA
TBB4B_MOUSE	P68372	322	S	1	A	o	NA
TBB4B_MOUSE	P68372	75	S	1	O	d	ind
TBB4B_MOUSE	P68372	78	S	1	O	o	NA
TBB4B_MOUSE	P68372	208	Y	1	Y	o	NA
TBB4B_MOUSE	P68372	338	S	1	O	o	NA
TBB4B_MOUSE	P68372	339	S	1	B	o	NA
TBB4B_MOUSE	P68372	340	Y	1	Y	o	NA
TBB4B_MOUSE	P68372	218	T	1	B	o	NA
TBB4B_MOUSE	P68372	219	T	1	P	o	NA
TBB4B_MOUSE	P68372	221	T	1	A	o	NA
TBB4B_MOUSE	P68372	222	Y	1	Y	o	NA
TBB4B_MOUSE	P68372	95	S	1	O	o	NA
TBB4B_MOUSE	P68372	106	Y	1	Y	o	NA
TBB4B_MOUSE	P68372	107	T	1	A	o	NA
TBB4B_MOUSE	P68372	168	S	1	O	o	NA
TBB4B_MOUSE	P68372	126	S	1	A	o	NA
TBB4B_MOUSE	P68372	115	S	1	A	o	NA
TBB4B_MOUSE	P68372	382	S	1	B	o	NA
CDN2B_MOUSE	P55271	12	T	2	O	d	ind
ARG28_MOUSE	P97433	1604	S	2	P	d	ind
ARG28_MOUSE	P97433	557	S	1	B	d	ind
ARG28_MOUSE	P97433	623	S	1	B	d	ind
ARG28_MOUSE	P97433	1169	S	1	A	d	ind
ARG28_MOUSE	P97433	755	S	1	O	d	isl
ARG28_MOUSE	P97433	948	Y	1	Y	o	NA
ARG28_MOUSE	P97433	757	S	1	O	d	isl
ARG28_MOUSE	P97433	1535	S	1	B	d	ind
ARG28_MOUSE	P97433	1280	S	1	O	d	ind
SMCA1_MOUSE	Q6PGB8	762	S	1	A	d	ind
SMCA1_MOUSE	Q6PGB8	123	S	1	P	d	isl
SMCA1_MOUSE	Q6PGB8	61	S	1	P	d	ind
SMCA1_MOUSE	Q6PGB8	122	T	1	B	d	isl
SMCA1_MOUSE	Q6PGB8	72	S	1	A	d	ind
LAGE3_MOUSE	Q9CR70	35	S	1	O	d	ind
LAGE3_MOUSE	Q9CR70	51	S	1	B	d	ind
SNX20_MOUSE	Q9D2Y5	9	S	1	P	d	isl
SNX20_MOUSE	Q9D2Y5	3	S	1	P	d	isl
SNX20_MOUSE	Q9D2Y5	115	S	1	B	o	NA
CLK3_MOUSE	O35492	226	S	2	B	d	isl
CLK3_MOUSE	O35492	197	S	1	B	d	isl
CLK3_MOUSE	O35492	199	S	1	B	d	isl
CLK3_MOUSE	O35492	173	S	1	B	d	isl
CLK3_MOUSE	O35492	14	T	1	B	d	ind
CLK3_MOUSE	O35492	175	S	1	B	d	isl
CLK3_MOUSE	O35492	174	Y	1	Y	d	isl
CLK3_MOUSE	O35492	21	S	1	B	d	ind
CLK3_MOUSE	O35492	215	S	1	A	d	ind
CLK3_MOUSE	O35492	280	S	1	B	d	isl
CLK3_MOUSE	O35492	281	S	1	B	d	isl
CLK3_MOUSE	O35492	283	S	1	A	d	isl
CLK3_MOUSE	O35492	157	S	2	P	d	isl
CLK3_MOUSE	O35492	155	Y	2	Y	d	isl
CLK3_MOUSE	O35492	224	S	2	P	d	isl
UBP14_MOUSE	Q9JMA1	226	T	1	A	d	isl
UBP14_MOUSE	Q9JMA1	148	S	2	O	o	NA
UBP14_MOUSE	Q9JMA1	136	Y	1	Y	o	NA
UBP14_MOUSE	Q9JMA1	393	S	1	P	d	ind
UBP14_MOUSE	Q9JMA1	491	S	1	A	d	ind
UBP14_MOUSE	Q9JMA1	143	S	2	A	d	ind
UBP14_MOUSE	Q9JMA1	52	T	2	B	o	NA
UBP14_MOUSE	Q9JMA1	235	T	1	P	d	isl
UBP14_MOUSE	Q9JMA1	285	Y	1	Y	o	NA
UBP14_MOUSE	Q9JMA1	222	S	2	A	d	isl
SRS12_MOUSE	Q8C8K3	228	S	1	P	d	isl
SRS12_MOUSE	Q8C8K3	232	S	1	P	d	isl
SRS12_MOUSE	Q8C8K3	110	S	1	P	d	isl
SRS12_MOUSE	Q8C8K3	112	S	1	A	d	isl
SRS12_MOUSE	Q8C8K3	121	S	1	B	d	ind
SRS12_MOUSE	Q8C8K3	255	S	1	B	d	ind
SRS12_MOUSE	Q8C8K3	224	S	1	O	d	isl
ZFP28_MOUSE	P10078	283	S	1	B	d	ind
ZFP28_MOUSE	P10078	653	T	1	B	d	ind
ZFP28_MOUSE	P10078	320	T	1	P	d	ind
RL36A_MOUSE	P83882	34	Y	1	Y	d	ind
CE164_MOUSE	Q5DU05	318	S	1	A	d	ind
CE164_MOUSE	Q5DU05	280	T	1	P	d	ind
WDR33_MOUSE	Q8K4P0	7	S	1	P	d	ind
WDR33_MOUSE	Q8K4P0	999	S	1	B	d	ind
WDR33_MOUSE	Q8K4P0	1204	S	1	P	d	ind
WDR33_MOUSE	Q8K4P0	1175	S	1	B	d	ind
WDR33_MOUSE	Q8K4P0	1273	S	1	B	d	ind
WDR33_MOUSE	Q8K4P0	1213	S	1	B	d	ind
DPYL5_MOUSE	Q9EQF6	514	T	2	P	d	isl
DPYL5_MOUSE	Q9EQF6	520	T	1	B	d	isl
DPYL5_MOUSE	Q9EQF6	531	S	1	O	d	isl
DPYL5_MOUSE	Q9EQF6	532	S	2	O	d	isl
DPYL5_MOUSE	Q9EQF6	534	S	1	O	d	isl
DPYL5_MOUSE	Q9EQF6	536	S	1	O	d	isl
DPYL5_MOUSE	Q9EQF6	538	S	2	A	d	isl
DPYL5_MOUSE	Q9EQF6	509	T	2	P	d	isl
ILEUB_MOUSE	Q8VHP7	194	T	1	B	d	ind
PUS3_MOUSE	Q9JI38	412	Y	1	Y	o	NA
PUS3_MOUSE	Q9JI38	400	T	1	O	o	NA
CSK22_MOUSE	O54833	18	S	1	O	o	NA
CSK22_MOUSE	O54833	195	S	1	B	o	NA
CSK22_MOUSE	O54833	333	S	1	B	o	NA
CSK22_MOUSE	O54833	288	S	1	A	o	NA
SRPK3_MOUSE	Q9Z0G2	49	S	2	A	d	ind
SRPK3_MOUSE	Q9Z0G2	331	S	1	O	d	isl
SRPK3_MOUSE	Q9Z0G2	424	T	1	O	o	NA
SRPK3_MOUSE	Q9Z0G2	333	S	1	P	d	isl
SRPK3_MOUSE	Q9Z0G2	328	S	2	P	d	isl
CDN2A_MOUSE	P51480	164	S	1	B	d	isl
CDN2A_MOUSE	P51480	168	S	1	O	d	isl
NRCAM_MOUSE	Q810U4	419	S	1	O	d	isl
NRCAM_MOUSE	Q810U4	420	S	1	O	d	isl
NRCAM_MOUSE	Q810U4	421	S	2	O	d	isl
NRCAM_MOUSE	Q810U4	1190	S	1	B	d	isl
NRCAM_MOUSE	Q810U4	1223	S	1	O	d	ind
NRCAM_MOUSE	Q810U4	1192	T	1	P	d	isl
NRCAM_MOUSE	Q810U4	1194	S	1	B	d	isl
NRCAM_MOUSE	Q810U4	1197	T	1	B	d	isl
NRCAM_MOUSE	Q810U4	720	S	1	O	d	ind
NRCAM_MOUSE	Q810U4	1203	S	2	B	d	isl
NRCAM_MOUSE	Q810U4	1173	T	2	A	d	isl
NRCAM_MOUSE	Q810U4	1206	S	2	A	d	isl
NRCAM_MOUSE	Q810U4	1242	S	2	A	d	isl
NRCAM_MOUSE	Q810U4	1177	Y	1	Y	d	isl
NRCAM_MOUSE	Q810U4	1178	S	2	A	d	isl
NRCAM_MOUSE	Q810U4	1243	S	2	A	d	isl
NRCAM_MOUSE	Q810U4	1247	S	2	P	d	isl
NRCAM_MOUSE	Q810U4	1254	S	1	O	d	isl
PARN_MOUSE	Q8VDG3	569	S	2	A	d	isl
PARN_MOUSE	Q8VDG3	554	T	1	B	d	isl
PARN_MOUSE	Q8VDG3	556	S	1	P	d	isl
PARN_MOUSE	Q8VDG3	573	S	2	A	d	isl
PARN_MOUSE	Q8VDG3	575	S	2	A	d	isl
F16A2_MOUSE	Q3U2I3	387	T	1	O	o	NA
F16A2_MOUSE	Q3U2I3	900	S	2	P	d	ind
F16A2_MOUSE	Q3U2I3	905	T	1	P	d	ind
F16A2_MOUSE	Q3U2I3	874	S	1	P	d	ind
F16A2_MOUSE	Q3U2I3	523	S	2	P	d	ind
F16A2_MOUSE	Q3U2I3	467	S	1	P	d	ind
F16A2_MOUSE	Q3U2I3	855	S	1	B	d	ind
F16A2_MOUSE	Q3U2I3	892	T	1	B	d	ind
F16A2_MOUSE	Q3U2I3	381	T	1	B	o	NA
F16A2_MOUSE	Q3U2I3	510	S	2	B	d	ind
F16A2_MOUSE	Q3U2I3	863	S	1	B	d	ind
GDAP1_MOUSE	O88741	130	S	1	O	o	NA
GDAP1_MOUSE	O88741	147	T	1	A	o	NA
GDAP1_MOUSE	O88741	157	T	1	O	o	NA
GDAP1_MOUSE	O88741	150	S	1	O	o	NA
MYP0_MOUSE	P27573	226	S	4	O	d	isl
MYP0_MOUSE	P27573	195	S	1	B	d	isl
MYP0_MOUSE	P27573	228	S	4	O	d	isl
MYP0_MOUSE	P27573	233	S	3	B	d	isl
MYP0_MOUSE	P27573	237	S	4	B	d	isl
MYP0_MOUSE	P27573	205	S	3	A	d	isl
MYP0_MOUSE	P27573	210	S	3	B	d	isl
MYP0_MOUSE	P27573	243	S	4	A	d	isl
MYP0_MOUSE	P27573	216	T	1	P	d	isl
TBB3_MOUSE	Q9ERD7	386	T	1	O	o	NA
TBB3_MOUSE	Q9ERD7	222	Y	1	Y	o	NA
TBB3_MOUSE	Q9ERD7	168	S	1	O	o	NA
TBB3_MOUSE	Q9ERD7	315	T	1	O	o	NA
TBB3_MOUSE	Q9ERD7	106	Y	1	Y	o	NA
TBB3_MOUSE	Q9ERD7	75	S	1	O	d	ind
TBB3_MOUSE	Q9ERD7	172	S	2	P	d	ind
TBB3_MOUSE	Q9ERD7	115	S	1	A	o	NA
TBB3_MOUSE	Q9ERD7	208	Y	1	Y	o	NA
TBB3_MOUSE	Q9ERD7	48	S	1	O	o	NA
TBB3_MOUSE	Q9ERD7	274	T	1	O	o	NA
TBB3_MOUSE	Q9ERD7	339	S	1	B	o	NA
TBB3_MOUSE	Q9ERD7	340	Y	1	Y	o	NA
TBB3_MOUSE	Q9ERD7	312	T	1	B	o	NA
TBB3_MOUSE	Q9ERD7	72	T	1	A	o	NA
TBB3_MOUSE	Q9ERD7	444	S	1	A	d	ind
TBB3_MOUSE	Q9ERD7	285	T	1	B	o	NA
TBB3_MOUSE	Q9ERD7	382	S	2	B	o	NA
CAMKV_MOUSE	Q3UHL1	321	T	1	B	o	NA
CAMKV_MOUSE	Q3UHL1	449	T	2	A	d	isl
CAMKV_MOUSE	Q3UHL1	387	S	1	A	d	ind
CAMKV_MOUSE	Q3UHL1	452	S	2	O	d	isl
CAMKV_MOUSE	Q3UHL1	453	T	1	O	d	isl
CAMKV_MOUSE	Q3UHL1	392	S	2	A	d	ind
CAMKV_MOUSE	Q3UHL1	446	T	2	P	d	isl
CAMKV_MOUSE	Q3UHL1	470	T	2	P	d	ind
CAMKV_MOUSE	Q3UHL1	345	T	3	P	d	ind
CAMKV_MOUSE	Q3UHL1	154	Y	1	Y	o	NA
CAMKV_MOUSE	Q3UHL1	251	Y	1	Y	o	NA
CAMKV_MOUSE	Q3UHL1	414	T	2	P	d	ind
SP1_MOUSE	O89090	321	S	1	O	d	isl
SP1_MOUSE	O89090	2	S	1	A	d	ind
SP1_MOUSE	O89090	7	S	2	A	d	ind
SP1_MOUSE	O89090	42	S	1	O	d	isl
SP1_MOUSE	O89090	43	S	1	B	d	isl
SP1_MOUSE	O89090	44	T	1	O	d	isl
SP1_MOUSE	O89090	47	S	1	O	d	isl
SP1_MOUSE	O89090	49	S	1	O	d	isl
SP1_MOUSE	O89090	309	S	1	O	d	isl
SP1_MOUSE	O89090	58	S	1	O	d	isl
SP1_MOUSE	O89090	61	S	4	P	d	isl
SP1_MOUSE	O89090	320	S	1	O	d	isl
TCPQ_MOUSE	P42932	327	T	1	B	o	NA
TCPQ_MOUSE	P42932	45	T	1	O	o	NA
TCPQ_MOUSE	P42932	47	Y	1	Y	o	NA
TCPQ_MOUSE	P42932	304	Y	1	Y	o	NA
TCPQ_MOUSE	P42932	23	S	2	B	o	NA
TCPQ_MOUSE	P42932	537	S	1	B	d	ind
TCPQ_MOUSE	P42932	317	S	1	B	o	NA
TCPQ_MOUSE	P42932	30	Y	1	Y	o	NA
ERG_MOUSE	P81270	222	S	1	P	d	ind
ERG_MOUSE	P81270	103	S	1	P	d	ind
ERG_MOUSE	P81270	55	S	1	P	d	ind
ERG_MOUSE	P81270	88	S	2	P	d	ind
HAND1_MOUSE	Q64279	107	T	4	B	d	isl
HAND1_MOUSE	Q64279	109	S	4	B	d	isl
NNRD_MOUSE	Q9CZ42	81	Y	2	Y	o	NA
NNRD_MOUSE	Q9CZ42	86	Y	1	Y	o	NA
NNRD_MOUSE	Q9CZ42	216	S	1	P	o	NA
STOX1_MOUSE	B2RQL2	811	S	1	O	o	NA
STOX1_MOUSE	B2RQL2	804	Y	1	Y	o	NA
STOX1_MOUSE	B2RQL2	829	S	1	O	d	ind
STOX1_MOUSE	B2RQL2	807	T	1	O	o	NA
STOX1_MOUSE	B2RQL2	816	S	1	P	d	ind
SCIMP_MOUSE	Q3UU41	65	S	2	P	d	isl
SCIMP_MOUSE	Q3UU41	120	Y	2	Y	d	ind
SCIMP_MOUSE	Q3UU41	77	S	2	P	d	ind
SCIMP_MOUSE	Q3UU41	64	S	1	O	d	isl
PPM1E_MOUSE	Q80TL0	545	S	1	B	d	ind
PPM1E_MOUSE	Q80TL0	539	Y	1	Y	d	ind
PPM1E_MOUSE	Q80TL0	532	S	2	O	d	ind
PPM1E_MOUSE	Q80TL0	654	S	1	O	d	ind
PPM1E_MOUSE	Q80TL0	495	S	1	A	d	ind
VTNC_MOUSE	P29788	362	S	2	O	d	isl
VTNC_MOUSE	P29788	324	S	1	A	o	NA
VTNC_MOUSE	P29788	360	S	1	O	d	isl
TRAF5_MOUSE	P70191	19	S	1	B	o	NA
GFOD1_MOUSE	Q3UHD2	387	S	1	B	d	ind
MSI1H_MOUSE	Q61474	200	S	1	B	d	ind
MSI1H_MOUSE	Q61474	12	S	1	P	d	isl
MSI1H_MOUSE	Q61474	205	Y	1	Y	o	NA
MSI1H_MOUSE	Q61474	15	S	1	P	d	isl
MSI1H_MOUSE	Q61474	337	S	1	P	d	ind
MSI1H_MOUSE	Q61474	191	S	1	P	d	ind
BSN_MOUSE	O88737	6	S	2	A	d	ind
BSN_MOUSE	O88737	1544	S	1	O	d	isl
BSN_MOUSE	O88737	1545	T	1	P	d	isl
BSN_MOUSE	O88737	1553	S	2	A	d	isl
BSN_MOUSE	O88737	1554	S	2	A	d	isl
BSN_MOUSE	O88737	2067	S	1	B	o	NA
BSN_MOUSE	O88737	2068	S	1	B	o	NA
BSN_MOUSE	O88737	1050	S	2	A	d	isl
BSN_MOUSE	O88737	1051	S	2	A	d	isl
BSN_MOUSE	O88737	2591	S	1	B	d	isl
BSN_MOUSE	O88737	2592	S	1	B	d	isl
BSN_MOUSE	O88737	2595	T	2	A	d	isl
BSN_MOUSE	O88737	2095	Y	1	Y	o	NA
BSN_MOUSE	O88737	180	S	1	O	d	isl
BSN_MOUSE	O88737	1079	S	1	B	d	ind
BSN_MOUSE	O88737	2619	S	1	B	d	ind
BSN_MOUSE	O88737	2622	T	2	A	d	ind
BSN_MOUSE	O88737	579	S	1	P	d	ind
BSN_MOUSE	O88737	2066	Y	1	Y	o	NA
BSN_MOUSE	O88737	2122	S	2	B	d	isl
BSN_MOUSE	O88737	2124	S	2	O	d	isl
BSN_MOUSE	O88737	1623	S	1	B	d	ind
BSN_MOUSE	O88737	1102	T	2	P	d	isl
BSN_MOUSE	O88737	593	S	1	P	d	ind
BSN_MOUSE	O88737	1108	S	2	P	d	isl
BSN_MOUSE	O88737	2645	S	1	A	d	isl
BSN_MOUSE	O88737	3158	S	1	B	d	ind
BSN_MOUSE	O88737	2647	S	1	A	d	isl
BSN_MOUSE	O88737	600	S	1	P	d	ind
BSN_MOUSE	O88737	2649	S	1	A	d	isl
BSN_MOUSE	O88737	1114	S	2	P	d	isl
BSN_MOUSE	O88737	2651	S	1	A	d	isl
BSN_MOUSE	O88737	1116	T	2	A	d	isl
BSN_MOUSE	O88737	2927	Y	1	Y	d	ind
BSN_MOUSE	O88737	2578	S	2	A	d	ind
BSN_MOUSE	O88737	105	S	2	P	d	ind
BSN_MOUSE	O88737	1136	Y	2	Y	d	isl
BSN_MOUSE	O88737	1137	S	1	P	d	isl
BSN_MOUSE	O88737	1650	S	1	B	d	ind
BSN_MOUSE	O88737	121	S	1	P	d	ind
BSN_MOUSE	O88737	2694	S	2	P	d	ind
BSN_MOUSE	O88737	140	S	1	B	d	isl
BSN_MOUSE	O88737	142	S	2	P	d	isl
BSN_MOUSE	O88737	2703	T	2	A	o	NA
BSN_MOUSE	O88737	3218	S	1	P	d	ind
BSN_MOUSE	O88737	148	T	1	P	d	isl
BSN_MOUSE	O88737	150	T	1	O	d	isl
BSN_MOUSE	O88737	151	S	1	P	d	isl
BSN_MOUSE	O88737	3227	S	1	O	d	ind
BSN_MOUSE	O88737	683	S	1	B	d	ind
BSN_MOUSE	O88737	178	T	1	P	d	isl
BSN_MOUSE	O88737	692	S	1	A	d	ind
BSN_MOUSE	O88737	3254	T	1	P	d	ind
BSN_MOUSE	O88737	700	S	1	A	d	ind
BSN_MOUSE	O88737	3022	S	2	A	d	isl
BSN_MOUSE	O88737	1233	S	1	O	d	isl
BSN_MOUSE	O88737	1236	S	2	A	d	isl
BSN_MOUSE	O88737	727	T	1	O	d	ind
BSN_MOUSE	O88737	1488	S	1	O	d	isl
BSN_MOUSE	O88737	3301	S	2	A	d	isl
BSN_MOUSE	O88737	3305	S	1	A	d	isl
BSN_MOUSE	O88737	3306	Y	1	Y	d	isl
BSN_MOUSE	O88737	1772	S	1	P	d	ind
BSN_MOUSE	O88737	2799	S	1	P	d	isl
BSN_MOUSE	O88737	1406	T	2	O	d	isl
BSN_MOUSE	O88737	241	S	2	P	d	isl
BSN_MOUSE	O88737	245	S	2	P	d	isl
BSN_MOUSE	O88737	2808	S	2	P	d	isl
BSN_MOUSE	O88737	249	S	1	P	d	isl
BSN_MOUSE	O88737	2811	S	2	P	d	isl
BSN_MOUSE	O88737	2822	S	1	A	d	isl
BSN_MOUSE	O88737	2823	S	1	A	d	isl
BSN_MOUSE	O88737	781	S	1	B	d	ind
BSN_MOUSE	O88737	789	S	1	A	d	ind
BSN_MOUSE	O88737	818	S	1	A	d	isl
BSN_MOUSE	O88737	2858	S	2	A	d	isl
BSN_MOUSE	O88737	2860	S	2	B	d	isl
BSN_MOUSE	O88737	817	S	1	A	d	isl
BSN_MOUSE	O88737	2866	S	2	P	d	isl
BSN_MOUSE	O88737	2868	T	1	A	d	isl
BSN_MOUSE	O88737	3382	S	2	P	d	ind
BSN_MOUSE	O88737	2872	S	1	A	d	isl
BSN_MOUSE	O88737	2362	S	1	B	d	ind
BSN_MOUSE	O88737	55	T	1	P	d	ind
BSN_MOUSE	O88737	839	S	1	P	d	ind
BSN_MOUSE	O88737	2908	S	2	P	d	ind
BSN_MOUSE	O88737	865	S	1	A	d	ind
BSN_MOUSE	O88737	3431	Y	2	Y	d	isl
BSN_MOUSE	O88737	3432	Y	2	Y	d	isl
BSN_MOUSE	O88737	1391	S	1	P	d	isl
BSN_MOUSE	O88737	1402	Y	1	Y	d	isl
BSN_MOUSE	O88737	1404	T	1	P	d	isl
BSN_MOUSE	O88737	3512	S	1	A	d	isl
BSN_MOUSE	O88737	1407	S	1	P	d	isl
BSN_MOUSE	O88737	3459	Y	2	Y	d	isl
BSN_MOUSE	O88737	3460	S	1	A	d	isl
BSN_MOUSE	O88737	1948	S	1	P	d	ind
BSN_MOUSE	O88737	3494	S	1	B	d	ind
BSN_MOUSE	O88737	2987	Y	1	Y	d	ind
BSN_MOUSE	O88737	943	T	1	B	d	ind
BSN_MOUSE	O88737	2993	T	1	O	d	ind
BSN_MOUSE	O88737	1464	S	1	A	d	ind
BSN_MOUSE	O88737	2805	S	1	P	d	isl
BSN_MOUSE	O88737	3516	S	1	P	d	isl
BSN_MOUSE	O88737	3519	S	1	P	d	isl
BSN_MOUSE	O88737	1475	Y	1	Y	d	isl
BSN_MOUSE	O88737	1100	S	2	B	d	isl
BSN_MOUSE	O88737	1990	S	2	A	d	ind
BSN_MOUSE	O88737	1479	T	1	O	d	isl
BSN_MOUSE	O88737	1481	S	2	O	d	isl
BSN_MOUSE	O88737	1482	S	2	P	d	isl
BSN_MOUSE	O88737	1486	S	2	P	d	isl
BSN_MOUSE	O88737	3024	S	1	A	d	isl
BSN_MOUSE	O88737	1489	T	1	P	d	isl
BSN_MOUSE	O88737	1491	S	2	A	d	isl
BSN_MOUSE	O88737	980	S	2	P	d	ind
BSN_MOUSE	O88737	1493	S	2	P	d	isl
BSN_MOUSE	O88737	1495	T	1	O	d	isl
BSN_MOUSE	O88737	1497	S	2	P	d	isl
BSN_MOUSE	O88737	2017	S	1	A	d	ind
BSN_MOUSE	O88737	1105	S	2	B	d	isl
BSN_MOUSE	O88737	1510	S	2	O	d	ind
BSN_MOUSE	O88737	2029	S	2	O	o	NA
BSN_MOUSE	O88737	85	S	1	O	d	ind
BSN_MOUSE	O88737	1019	S	2	P	d	ind
BSN_MOUSE	O88737	2044	Y	2	Y	o	NA
BSN_MOUSE	O88737	2046	S	2	A	o	NA
DOCK1_MOUSE	Q8BUR4	1761	S	1	P	d	isl
DOCK1_MOUSE	Q8BUR4	1250	S	0	A	o	NA
DOCK1_MOUSE	Q8BUR4	1857	T	1	B	d	isl
DOCK1_MOUSE	Q8BUR4	1764	S	1	O	d	isl
DOCK1_MOUSE	Q8BUR4	1637	T	1	B	d	ind
DOCK1_MOUSE	Q8BUR4	1767	T	2	P	d	isl
DOCK1_MOUSE	Q8BUR4	1826	S	1	P	d	ind
DOCK1_MOUSE	Q8BUR4	1852	T	1	O	d	isl
DOCK1_MOUSE	Q8BUR4	1772	T	2	P	d	isl
DOCK1_MOUSE	Q8BUR4	1743	S	2	B	d	ind
DOCK1_MOUSE	Q8BUR4	542	T	1	O	o	NA
DOCK1_MOUSE	Q8BUR4	1681	S	1	A	d	ind
DOCK1_MOUSE	Q8BUR4	1842	S	1	O	d	isl
DOCK1_MOUSE	Q8BUR4	1811	Y	1	Y	d	ind
DOCK1_MOUSE	Q8BUR4	1844	T	1	P	d	isl
DOCK1_MOUSE	Q8BUR4	1055	Y	1	Y	o	NA
DOCK1_MOUSE	Q8BUR4	601	S	1	O	d	ind
DOCK1_MOUSE	Q8BUR4	1756	S	2	B	d	isl
DOCK1_MOUSE	Q8BUR4	1853	T	1	O	d	isl
DOCK1_MOUSE	Q8BUR4	1758	S	1	P	d	isl
DOCK1_MOUSE	Q8BUR4	1858	S	2	B	d	isl
CISH_MOUSE	Q62225	253	Y	1	Y	o	NA
NSUN6_MOUSE	Q7TS68	286	S	1	O	o	NA
THIL_MOUSE	Q8QZT1	66	T	1	B	o	NA
THIL_MOUSE	Q8QZT1	328	Y	1	Y	o	NA
THIL_MOUSE	Q8QZT1	233	T	1	P	o	NA
THIL_MOUSE	Q8QZT1	204	S	1	A	d	ind
THIL_MOUSE	Q8QZT1	238	S	1	O	o	NA
THIL_MOUSE	Q8QZT1	214	S	1	O	d	ind
THIL_MOUSE	Q8QZT1	87	Y	1	Y	o	NA
THIL_MOUSE	Q8QZT1	152	S	1	O	d	isl
THIL_MOUSE	Q8QZT1	154	S	1	O	d	isl
THIL_MOUSE	Q8QZT1	158	Y	1	Y	o	NA
MYO3A_MOUSE	Q8K3H5	1218	Y	1	Y	d	ind
MYO3A_MOUSE	Q8K3H5	332	S	1	B	d	ind
MYO3A_MOUSE	Q8K3H5	177	S	1	O	d	ind
MYO3A_MOUSE	Q8K3H5	184	T	1	B	o	NA
MYO3A_MOUSE	Q8K3H5	313	S	1	A	o	NA
MYO3A_MOUSE	Q8K3H5	864	S	1	O	d	ind
CAD10_MOUSE	P70408	701	T	1	P	d	ind
CAD10_MOUSE	P70408	784	S	2	A	d	ind
CAD10_MOUSE	P70408	325	T	1	A	o	NA
CAD10_MOUSE	P70408	646	S	1	A	o	NA
CAD10_MOUSE	P70408	656	S	1	A	o	NA
KATL2_MOUSE	Q9D3R6	294	Y	1	Y	o	NA
I10R2_MOUSE	Q61190	299	S	2	A	d	ind
I10R2_MOUSE	Q61190	334	S	1	P	d	ind
CLCN3_MOUSE	P51791	745	S	1	P	d	ind
CLCN3_MOUSE	P51791	606	Y	1	Y	o	NA
EIF3I_MOUSE	Q9QZD9	218	T	1	A	d	ind
EIF3I_MOUSE	Q9QZD9	308	Y	1	Y	o	NA
COA5_MOUSE	Q99M07	60	S	1	A	d	ind
QOR_MOUSE	P47199	35	S	2	O	o	NA
QOR_MOUSE	P47199	165	T	1	O	o	NA
CC105_MOUSE	Q9D4K7	372	Y	2	Y	o	NA
CC105_MOUSE	Q9D4K7	407	T	1	O	d	ind
MARK4_MOUSE	Q8CIP4	442	T	1	A	d	isl
MARK4_MOUSE	Q8CIP4	214	T	1	B	o	NA
MARK4_MOUSE	Q8CIP4	423	S	2	B	d	ind
MARK4_MOUSE	Q8CIP4	458	S	1	B	d	ind
MARK4_MOUSE	Q8CIP4	300	T	1	B	o	NA
MARK4_MOUSE	Q8CIP4	45	S	1	B	d	ind
MARK4_MOUSE	Q8CIP4	515	T	1	A	d	ind
MARK4_MOUSE	Q8CIP4	665	T	1	O	d	isl
MARK4_MOUSE	Q8CIP4	563	S	1	B	d	ind
MARK4_MOUSE	Q8CIP4	511	T	1	B	d	ind
MARK4_MOUSE	Q8CIP4	438	S	1	P	d	isl
MARK4_MOUSE	Q8CIP4	666	S	1	B	d	isl
MARK4_MOUSE	Q8CIP4	441	S	1	A	d	isl
MARK4_MOUSE	Q8CIP4	218	S	1	P	o	NA
MARK4_MOUSE	Q8CIP4	667	S	1	O	d	isl
MARK4_MOUSE	Q8CIP4	221	Y	1	Y	o	NA
MARK4_MOUSE	Q8CIP4	543	S	1	P	d	ind
MARK4_MOUSE	Q8CIP4	64	T	1	B	o	NA
TLDC1_MOUSE	Q8K0P3	438	S	1	O	d	ind
TM248_MOUSE	Q3TBN1	300	S	1	A	d	ind
RHG28_MOUSE	Q8BN58	162	T	1	B	d	isl
RHG28_MOUSE	Q8BN58	164	T	2	O	d	isl
RHG28_MOUSE	Q8BN58	70	S	1	A	d	ind
RHG28_MOUSE	Q8BN58	295	S	1	A	d	isl
RHG28_MOUSE	Q8BN58	616	T	1	B	d	ind
RHG28_MOUSE	Q8BN58	297	S	1	A	d	isl
RHG28_MOUSE	Q8BN58	296	Y	1	Y	d	isl
RHG28_MOUSE	Q8BN58	160	T	1	B	d	isl
RHG28_MOUSE	Q8BN58	145	T	1	O	o	NA
RHG28_MOUSE	Q8BN58	53	S	1	B	d	ind
RHG28_MOUSE	Q8BN58	185	S	1	P	d	isl
RHG28_MOUSE	Q8BN58	188	S	1	A	d	isl
RHG28_MOUSE	Q8BN58	190	S	1	A	d	isl
RHG28_MOUSE	Q8BN58	63	S	1	O	d	ind
RHG28_MOUSE	Q8BN58	640	S	1	B	d	ind
TF2AA_MOUSE	Q99PM3	323	S	1	A	d	isl
TF2AA_MOUSE	Q99PM3	318	S	1	A	d	isl
PLBL1_MOUSE	Q8VCI0	457	Y	1	Y	o	NA
TROAP_MOUSE	B7ZNG4	666	S	1	P	d	ind
TROAP_MOUSE	B7ZNG4	242	T	1	A	d	ind
RRP1_MOUSE	P56183	489	S	1	B	d	ind
RRP1_MOUSE	P56183	434	S	2	A	d	isl
RRP1_MOUSE	P56183	438	S	1	O	d	isl
RRP1_MOUSE	P56183	440	S	1	A	d	isl
RRP1_MOUSE	P56183	61	Y	1	Y	o	NA
RRP1_MOUSE	P56183	319	T	1	P	d	ind
CCDC8_MOUSE	D3YZV8	146	S	1	A	d	isl
CCDC8_MOUSE	D3YZV8	62	S	1	B	d	isl
CCDC8_MOUSE	D3YZV8	63	T	1	P	d	isl
CCDC8_MOUSE	D3YZV8	142	S	2	A	d	isl
PLTP_MOUSE	P55065	27	T	1	B	o	NA
PLTP_MOUSE	P55065	28	S	1	B	o	NA
SLIT1_MOUSE	Q80TR4	456	T	1	O	o	NA
RASF3_MOUSE	Q99P51	60	Y	1	Y	d	ind
ASPP1_MOUSE	Q62415	708	S	2	B	d	ind
ASPP1_MOUSE	Q62415	102	T	1	O	d	ind
ASPP1_MOUSE	Q62415	679	S	1	P	d	ind
ASPP1_MOUSE	Q62415	521	S	1	O	d	ind
ASPP1_MOUSE	Q62415	332	S	2	P	d	isl
ASPP1_MOUSE	Q62415	335	S	2	P	d	isl
ASPP1_MOUSE	Q62415	669	S	2	P	d	isl
ASPP1_MOUSE	Q62415	671	T	1	O	d	isl
RABE2_MOUSE	Q91WG2	359	S	1	B	d	ind
RABE2_MOUSE	Q91WG2	176	S	1	B	d	isl
RABE2_MOUSE	Q91WG2	180	S	1	A	d	isl
RABE2_MOUSE	Q91WG2	181	T	1	A	d	isl
RABE2_MOUSE	Q91WG2	187	S	1	O	d	isl
RABE2_MOUSE	Q91WG2	191	S	1	P	d	isl
AAA1_MOUSE	P63115	9	S	1	O	d	isl
AAA1_MOUSE	P63115	27	S	1	P	d	ind
AAA1_MOUSE	P63115	5	S	1	B	d	isl
ADA2C_MOUSE	Q01337	257	S	1	P	d	ind
ADA2C_MOUSE	Q01337	354	S	1	O	d	ind
ADA2C_MOUSE	Q01337	241	T	1	B	o	NA
ADA2C_MOUSE	Q01337	312	T	1	O	d	isl
ADA2C_MOUSE	Q01337	314	S	1	A	d	isl
ADA2C_MOUSE	Q01337	348	S	1	A	d	ind
WASF2_MOUSE	Q8BH43	481	S	1	A	d	isl
WASF2_MOUSE	Q8BH43	483	S	1	A	d	isl
WASF2_MOUSE	Q8BH43	487	S	1	A	d	isl
WASF2_MOUSE	Q8BH43	488	S	1	A	d	isl
WASF2_MOUSE	Q8BH43	137	S	1	P	d	ind
WASF2_MOUSE	Q8BH43	496	S	1	A	d	isl
WASF2_MOUSE	Q8BH43	473	S	1	O	d	ind
WASF2_MOUSE	Q8BH43	150	Y	2	Y	o	NA
WASF2_MOUSE	Q8BH43	441	S	1	O	d	ind
WASF2_MOUSE	Q8BH43	155	Y	1	Y	o	NA
WASF2_MOUSE	Q8BH43	284	S	1	O	d	ind
WASF2_MOUSE	Q8BH43	29	T	1	O	o	NA
WASF2_MOUSE	Q8BH43	32	T	1	O	o	NA
POF1B_MOUSE	Q8K4L4	493	S	1	B	d	ind
POF1B_MOUSE	Q8K4L4	77	S	1	P	d	ind
POF1B_MOUSE	Q8K4L4	126	T	1	O	d	ind
POF1B_MOUSE	Q8K4L4	151	S	1	P	d	ind
POF1B_MOUSE	Q8K4L4	57	S	1	B	d	ind
POF1B_MOUSE	Q8K4L4	91	S	1	A	d	isl
POF1B_MOUSE	Q8K4L4	94	S	1	A	d	isl
POF1B_MOUSE	Q8K4L4	411	S	1	A	d	ind
MYP2_MOUSE	P24526	129	Y	1	Y	o	NA
MYP2_MOUSE	P24526	61	T	1	A	o	NA
MYP2_MOUSE	P24526	126	T	1	O	o	NA
MYP2_MOUSE	P24526	64	S	1	O	o	NA
PRDX5_MOUSE	P99029	178	S	2	B	o	NA
PRDX5_MOUSE	P99029	164	S	1	O	o	NA
PRDX5_MOUSE	P99029	93	T	1	P	o	NA
PRDX5_MOUSE	P99029	167	S	1	O	o	NA
PGAM2_MOUSE	O70250	134	T	1	O	d	isl
PGAM2_MOUSE	O70250	132	Y	1	Y	d	isl
PGAM2_MOUSE	O70250	133	Y	1	Y	d	isl
PGAM2_MOUSE	O70250	103	T	1	B	d	ind
PGAM2_MOUSE	O70250	135	S	1	O	d	isl
PGAM2_MOUSE	O70250	14	S	1	O	o	NA
PGAM2_MOUSE	O70250	118	S	2	A	o	NA
PGAM2_MOUSE	O70250	121	T	1	P	d	isl
PGAM2_MOUSE	O70250	58	S	1	O	o	NA
PGAM2_MOUSE	O70250	92	Y	1	Y	o	NA
PGAM2_MOUSE	O70250	189	S	1	O	o	NA
PGAM2_MOUSE	O70250	96	T	1	O	o	NA
EPN3_MOUSE	Q91W69	257	S	2	P	d	ind
EPN3_MOUSE	Q91W69	386	S	1	O	d	isl
EPN3_MOUSE	Q91W69	387	S	1	P	d	isl
EPN3_MOUSE	Q91W69	389	T	1	O	d	isl
EPN3_MOUSE	Q91W69	199	T	1	B	d	ind
EPN3_MOUSE	Q91W69	105	T	1	A	o	NA
EPN3_MOUSE	Q91W69	458	S	1	P	d	ind
EPN3_MOUSE	Q91W69	494	T	1	P	d	ind
EPN3_MOUSE	Q91W69	175	S	1	P	d	isl
EPN3_MOUSE	Q91W69	177	S	1	B	d	isl
EPN3_MOUSE	Q91W69	178	S	1	O	d	isl
EPN3_MOUSE	Q91W69	179	Y	1	Y	d	isl
EPN3_MOUSE	Q91W69	111	Y	1	Y	o	NA
EPN3_MOUSE	Q91W69	184	S	1	O	d	isl
EPN3_MOUSE	Q91W69	185	S	2	P	d	isl
CUED1_MOUSE	Q8R3V6	227	S	2	O	d	ind
CUED1_MOUSE	Q8R3V6	232	Y	1	Y	d	ind
CUED1_MOUSE	Q8R3V6	9	S	1	B	d	isl
CUED1_MOUSE	Q8R3V6	12	S	1	B	d	isl
CUED1_MOUSE	Q8R3V6	275	S	1	B	d	ind
CUED1_MOUSE	Q8R3V6	182	S	1	A	d	ind
PWP2A_MOUSE	Q69Z61	363	S	1	B	d	ind
PWP2A_MOUSE	Q69Z61	607	S	1	O	d	ind
HPCA_MOUSE	P84075	175	S	1	A	d	ind
HPCA_MOUSE	P84075	23	S	1	A	d	ind
F206A_MOUSE	Q80ZQ9	192	T	1	P	d	ind
PTPRN_MOUSE	Q60673	307	S	2	A	d	isl
PTPRN_MOUSE	Q60673	308	S	2	A	d	isl
AGO3_MOUSE	Q8CJF9	825	S	1	A	d	isl
AGO3_MOUSE	Q8CJF9	835	S	1	O	d	isl
AGO3_MOUSE	Q8CJF9	829	S	1	O	d	isl
AGO3_MOUSE	Q8CJF9	655	Y	1	Y	o	NA
AGO3_MOUSE	Q8CJF9	832	S	1	O	d	isl
NGEF_MOUSE	Q8CHT1	579	Y	1	Y	d	isl
NGEF_MOUSE	Q8CHT1	229	S	1	P	d	ind
NGEF_MOUSE	Q8CHT1	180	Y	1	Y	o	NA
NGEF_MOUSE	Q8CHT1	584	S	1	O	d	isl
NGEF_MOUSE	Q8CHT1	585	S	1	B	d	isl
NGEF_MOUSE	Q8CHT1	587	S	1	A	d	isl
NGEF_MOUSE	Q8CHT1	366	Y	1	Y	o	NA
NGEF_MOUSE	Q8CHT1	623	Y	1	Y	o	NA
NGEF_MOUSE	Q8CHT1	177	Y	2	Y	o	NA
NGEF_MOUSE	Q8CHT1	363	Y	1	Y	o	NA
NGEF_MOUSE	Q8CHT1	84	S	1	B	d	ind
NGEF_MOUSE	Q8CHT1	537	Y	1	Y	o	NA
NGEF_MOUSE	Q8CHT1	606	S	2	B	o	NA
NGEF_MOUSE	Q8CHT1	518	Y	1	Y	o	NA
MET15_MOUSE	Q9DCL4	226	Y	1	Y	o	NA
MET15_MOUSE	Q9DCL4	358	S	1	A	d	ind
MTG8_MOUSE	Q61909	5	T	1	A	d	ind
MTG8_MOUSE	Q61909	390	S	1	P	d	ind
MTG8_MOUSE	Q61909	20	T	1	O	d	isl
MTG8_MOUSE	Q61909	565	T	1	P	d	isl
MTG8_MOUSE	Q61909	22	S	1	B	d	isl
MTG8_MOUSE	Q61909	568	T	1	P	d	isl
MTG8_MOUSE	Q61909	570	S	1	A	d	isl
T132D_MOUSE	Q76HP3	1009	S	1	O	d	ind
T132D_MOUSE	Q76HP3	315	T	1	B	o	NA
EPC2_MOUSE	Q8C0I4	434	Y	1	Y	o	NA
EPC2_MOUSE	Q8C0I4	552	T	1	B	d	ind
ID3_MOUSE	P41133	5	S	1	P	d	ind
STK24_MOUSE	Q99KH8	34	S	1	A	o	NA
STK24_MOUSE	Q99KH8	4	S	2	P	d	isl
STK24_MOUSE	Q99KH8	8	S	1	O	d	isl
STK24_MOUSE	Q99KH8	170	T	1	A	o	NA
STK24_MOUSE	Q99KH8	299	S	1	A	d	ind
STK24_MOUSE	Q99KH8	172	T	1	O	o	NA
STK24_MOUSE	Q99KH8	79	S	3	P	o	NA
STK24_MOUSE	Q99KH8	81	Y	1	Y	o	NA
STK24_MOUSE	Q99KH8	178	T	1	B	o	NA
STK24_MOUSE	Q99KH8	341	T	1	O	d	ind
STK24_MOUSE	Q99KH8	182	T	1	P	o	NA
HXA3_MOUSE	P02831	149	S	1	P	d	ind
MYZAP_MOUSE	Q3UIJ9	18	S	1	P	d	ind
MYZAP_MOUSE	Q3UIJ9	435	S	1	P	d	ind
MYZAP_MOUSE	Q3UIJ9	5	T	1	O	d	ind
SYT5_MOUSE	Q9R0N5	275	S	1	A	o	NA
SYT5_MOUSE	Q9R0N5	278	Y	1	Y	o	NA
SYT5_MOUSE	Q9R0N5	95	S	1	P	d	ind
PRC1_MOUSE	Q99K43	497	S	1	O	d	ind
PRC1_MOUSE	Q99K43	11	S	1	O	o	NA
PRC1_MOUSE	Q99K43	4	S	1	A	d	ind
GARL3_MOUSE	Q3V0G7	449	S	2	B	d	isl
GARL3_MOUSE	Q3V0G7	68	S	2	A	o	NA
GARL3_MOUSE	Q3V0G7	1029	S	1	A	d	isl
GARL3_MOUSE	Q3V0G7	871	S	1	O	d	ind
GARL3_MOUSE	Q3V0G7	455	S	2	P	d	isl
GARL3_MOUSE	Q3V0G7	490	S	1	O	d	ind
GARL3_MOUSE	Q3V0G7	847	T	1	O	d	isl
GARL3_MOUSE	Q3V0G7	848	S	1	P	d	isl
GARL3_MOUSE	Q3V0G7	851	T	2	P	d	isl
GARL3_MOUSE	Q3V0G7	948	T	1	A	d	ind
GARL3_MOUSE	Q3V0G7	857	T	1	P	d	isl
GARL3_MOUSE	Q3V0G7	901	T	1	P	o	NA
GARL3_MOUSE	Q3V0G7	893	S	1	P	d	ind
GARL3_MOUSE	Q3V0G7	447	S	1	A	d	isl
GARL3_MOUSE	Q3V0G7	1030	S	1	A	d	isl
ACACB_MOUSE	E9Q4Z2	1155	T	1	O	o	NA
ACACB_MOUSE	E9Q4Z2	136	S	1	P	d	isl
ACACB_MOUSE	E9Q4Z2	138	S	1	A	d	isl
ACACB_MOUSE	E9Q4Z2	1350	S	1	P	o	NA
ACACB_MOUSE	E9Q4Z2	290	T	1	P	o	NA
ACACB_MOUSE	E9Q4Z2	47	S	1	O	d	ind
ACACB_MOUSE	E9Q4Z2	1330	S	2	O	d	isl
ACACB_MOUSE	E9Q4Z2	1332	S	2	A	d	isl
ACACB_MOUSE	E9Q4Z2	181	S	1	B	d	isl
ACACB_MOUSE	E9Q4Z2	185	S	1	B	d	isl
ACACB_MOUSE	E9Q4Z2	1341	T	1	B	d	ind
ACACB_MOUSE	E9Q4Z2	446	S	1	A	d	ind
ACACB_MOUSE	E9Q4Z2	197	T	1	A	d	isl
ACACB_MOUSE	E9Q4Z2	198	S	1	A	d	isl
ACACB_MOUSE	E9Q4Z2	202	S	1	O	d	isl
ACACB_MOUSE	E9Q4Z2	459	S	1	B	d	ind
ACACB_MOUSE	E9Q4Z2	206	T	1	O	d	isl
ACACB_MOUSE	E9Q4Z2	81	S	1	O	d	ind
ACACB_MOUSE	E9Q4Z2	210	S	1	O	d	isl
ACACB_MOUSE	E9Q4Z2	851	Y	1	Y	o	NA
ACACB_MOUSE	E9Q4Z2	212	S	4	O	d	isl
ACACB_MOUSE	E9Q4Z2	1629	T	1	A	o	NA
ACACB_MOUSE	E9Q4Z2	1631	S	1	A	o	NA
ACACB_MOUSE	E9Q4Z2	867	Y	1	Y	o	NA
ACACB_MOUSE	E9Q4Z2	870	T	1	O	o	NA
ACACB_MOUSE	E9Q4Z2	1642	T	1	A	o	NA
ACACB_MOUSE	E9Q4Z2	236	S	1	P	o	NA
ACACB_MOUSE	E9Q4Z2	190	S	1	A	d	isl
THEG_MOUSE	Q9JMB1	325	S	1	O	o	NA
THEG_MOUSE	Q9JMB1	326	S	1	O	o	NA
THEG_MOUSE	Q9JMB1	10	S	1	O	d	isl
THEG_MOUSE	Q9JMB1	363	Y	1	Y	o	NA
THEG_MOUSE	Q9JMB1	108	S	1	O	d	ind
THEG_MOUSE	Q9JMB1	13	S	1	O	d	isl
THEG_MOUSE	Q9JMB1	174	T	1	O	o	NA
THEG_MOUSE	Q9JMB1	330	S	1	B	o	NA
THEG_MOUSE	Q9JMB1	128	T	1	B	d	ind
RAI1_MOUSE	Q61818	899	S	1	P	d	ind
RAI1_MOUSE	Q61818	904	S	1	A	d	ind
RAI1_MOUSE	Q61818	1424	T	1	B	d	ind
RAI1_MOUSE	Q61818	1428	S	1	O	d	ind
RAI1_MOUSE	Q61818	790	S	1	A	d	ind
RAI1_MOUSE	Q61818	666	S	2	P	d	ind
RAI1_MOUSE	Q61818	1051	T	1	P	d	ind
RAI1_MOUSE	Q61818	679	T	1	A	d	isl
RAI1_MOUSE	Q61818	680	T	1	A	d	isl
RAI1_MOUSE	Q61818	687	S	1	P	d	isl
RAI1_MOUSE	Q61818	50	Y	1	Y	d	ind
RAI1_MOUSE	Q61818	1332	S	1	P	d	ind
RAI1_MOUSE	Q61818	1085	S	1	P	d	ind
RAI1_MOUSE	Q61818	1343	S	2	P	d	ind
RAI1_MOUSE	Q61818	1093	S	1	O	d	ind
RAI1_MOUSE	Q61818	455	T	1	P	d	ind
RAI1_MOUSE	Q61818	1105	S	2	P	d	ind
RAI1_MOUSE	Q61818	1109	S	1	O	d	ind
RAI1_MOUSE	Q61818	983	S	1	B	d	ind
RAI1_MOUSE	Q61818	856	S	1	A	d	ind
RAI1_MOUSE	Q61818	1754	S	1	O	d	ind
RAI1_MOUSE	Q61818	1116	S	1	P	d	ind
RAI1_MOUSE	Q61818	1764	S	1	B	d	ind
RAI1_MOUSE	Q61818	875	S	1	P	d	ind
RAI1_MOUSE	Q61818	1520	S	1	P	d	ind
C19L2_MOUSE	Q8BG79	402	T	1	B	d	ind
C19L2_MOUSE	Q8BG79	622	S	1	A	d	ind
NELFE_MOUSE	P19426	131	S	2	A	d	isl
NELFE_MOUSE	P19426	135	S	1	B	d	isl
NELFE_MOUSE	P19426	139	S	1	A	d	isl
NELFE_MOUSE	P19426	140	S	1	A	d	isl
NELFE_MOUSE	P19426	276	T	1	P	o	NA
NELFE_MOUSE	P19426	285	S	1	P	o	NA
NELFE_MOUSE	P19426	36	S	1	B	d	isl
NELFE_MOUSE	P19426	37	S	1	B	d	isl
NELFE_MOUSE	P19426	38	S	1	B	d	isl
NELFE_MOUSE	P19426	42	S	1	O	d	isl
NELFE_MOUSE	P19426	49	S	1	A	d	isl
NELFE_MOUSE	P19426	51	S	2	B	d	isl
NELFE_MOUSE	P19426	181	S	1	P	d	ind
NELFE_MOUSE	P19426	195	S	1	A	d	ind
NELFE_MOUSE	P19426	89	S	1	B	d	isl
NELFE_MOUSE	P19426	91	T	1	B	d	isl
NELFE_MOUSE	P19426	351	S	1	O	o	NA
NELFE_MOUSE	P19426	357	S	2	P	d	ind
NELFE_MOUSE	P19426	113	S	1	O	d	isl
NELFE_MOUSE	P19426	115	S	2	B	d	isl
NELFE_MOUSE	P19426	253	S	1	A	d	isl
NELFE_MOUSE	P19426	255	S	1	B	d	isl
MAP1S_MOUSE	Q8C052	520	S	1	B	d	ind
MAP1S_MOUSE	Q8C052	527	T	1	O	d	ind
[truncated: 81,828 more rows]

## Sheet: hmr_psite_islands
seq_id	isl_id	psite_crds
ACK1_HUMAN	ACK1_HUMAN_0	602.606
ACK1_HUMAN	ACK1_HUMAN_1	826.828
ACK1_HUMAN	ACK1_HUMAN_2	516.517
LBR_HUMAN	LBR_HUMAN_0	58,66,68,70,81,83,85,96,98,100
MS3L1_HUMAN	MS3L1_HUMAN_0	391,395,398,399,404,406,410
GRB7_HUMAN	GRB7_HUMAN_0	22.26
GRB7_HUMAN	GRB7_HUMAN_1	410.416
GRB7_HUMAN	GRB7_HUMAN_2	360,365,367
F117B_HUMAN	F117B_HUMAN_0	386,387,388,390
F117B_HUMAN	F117B_HUMAN_1	104.105
F117B_HUMAN	F117B_HUMAN_2	191,193,219,222
KMT2C_HUMAN	KMT2C_HUMAN_0	4299.43
NUMBL_HUMAN	NUMBL_HUMAN_0	223,227,262,264,267,268,269,278,304,312,316,323,408,410
RIMS3_HUMAN	RIMS3_HUMAN_0	294,296,297,300,302,303
EZH2_HUMAN	EZH2_HUMAN_0	338,344,361,362,365,366,368
SC6A6_HUMAN	SC6A6_HUMAN_0	20.24
CDK16_HUMAN	CDK16_HUMAN_0	477.479
CDK16_HUMAN	CDK16_HUMAN_1	63,64,77,81,85,87,88,89,94,109,110,118
FBX31_HUMAN	FBX31_HUMAN_0	32.36
COPE_HUMAN	COPE_HUMAN_0	9.12
KAT2B_HUMAN	KAT2B_HUMAN_0	728.73
PCBP2_HUMAN	PCBP2_HUMAN_0	172,178,181,186,187,188
PCBP2_HUMAN	PCBP2_HUMAN_1	265.271
PCBP2_HUMAN	PCBP2_HUMAN_2	363.364
PTN14_HUMAN	PTN14_HUMAN_0	311,313,322,327
PTN14_HUMAN	PTN14_HUMAN_1	484,485,577,578,590,592,593
PRRX1_HUMAN	PRRX1_HUMAN_0	70,71,73,75
NOL8_HUMAN	NOL8_HUMAN_0	377.38
NOL8_HUMAN	NOL8_HUMAN_1	836,837,842,887,889,1081,1082,1083,1097,1098
NOL8_HUMAN	NOL8_HUMAN_2	297.303
SAS10_HUMAN	SAS10_HUMAN_0	36,40,41
KPCE_HUMAN	KPCE_HUMAN_0	315,328,336,343,345,349
KPCE_HUMAN	KPCE_HUMAN_1	227.233
HNRH3_HUMAN	HNRH3_HUMAN_0	295.297
PLSL_HUMAN	PLSL_HUMAN_0	4.6
SH2B3_HUMAN	SH2B3_HUMAN_0	552,558,571
SRSF1_HUMAN	SRSF1_HUMAN_0	186,188,198,200,201,204,206,220,222,224,225,226,230,233,236,237,241,243
WDR24_HUMAN	WDR24_HUMAN_0	723.727
AKAP1_HUMAN	AKAP1_HUMAN_0	572,576,591
AKAP1_HUMAN	AKAP1_HUMAN_1	104,106,107
LA_HUMAN	LA_HUMAN_0	91.93
SKA3_HUMAN	SKA3_HUMAN_0	138,154,158
PIAS2_HUMAN	PIAS2_HUMAN_0	475,476,477
PIAS2_HUMAN	PIAS2_HUMAN_1	112.115
RIMS1_HUMAN	RIMS1_HUMAN_0	1335,1338,1339,1341
RIMS1_HUMAN	RIMS1_HUMAN_1	727.73
RIMS1_HUMAN	RIMS1_HUMAN_2	1676,1678,1679,1691
ZDHC8_HUMAN	ZDHC8_HUMAN_0	523,525,536,540,544
ZDHC8_HUMAN	ZDHC8_HUMAN_1	674.678
ABLM2_HUMAN	ABLM2_HUMAN_0	281,291,293
ABLM2_HUMAN	ABLM2_HUMAN_1	363.366
MLRS_HUMAN	MLRS_HUMAN_0	14.15
CGBP1_HUMAN	CGBP1_HUMAN_0	138.142
HNF1A_HUMAN	HNF1A_HUMAN_0	69.73
HNF1A_HUMAN	HNF1A_HUMAN_1	246.248
GAB1_HUMAN	GAB1_HUMAN_0	241,250,252,255,258,265
GAB1_HUMAN	GAB1_HUMAN_1	303,306,311,315,316
GAB1_HUMAN	GAB1_HUMAN_2	368,372,386,401,405,416,417,418
GAB1_HUMAN	GAB1_HUMAN_3	471,475,499,502
GAB1_HUMAN	GAB1_HUMAN_4	626,633,637
OPRD_HUMAN	OPRD_HUMAN_0	343,357,360,362
MDM4_HUMAN	MDM4_HUMAN_0	364.366
2A5B_HUMAN	2A5B_HUMAN_0	15,19,31,34,43,45,46,47,51
INO80_HUMAN	INO80_HUMAN_0	1486.15
INO80_HUMAN	INO80_HUMAN_1	46,47,50
EMD_HUMAN	EMD_HUMAN_0	48,58,73,84,86,93,94,103,104,140,141,142,154,158,160,166,174
TTC7A_HUMAN	TTC7A_HUMAN_0	671,677,678,689,692,696
SCN2A_HUMAN	SCN2A_HUMAN_0	1111,1123,1125
P5I11_HUMAN	P5I11_HUMAN_0	13.15
PLCG1_HUMAN	PLCG1_HUMAN_0	471.48
PLCG1_HUMAN	PLCG1_HUMAN_1	1220,1223,1226,1232,1247,1252,1262
LRC47_HUMAN	LRC47_HUMAN_0	519.521
PLIN1_HUMAN	PLIN1_HUMAN_0	298,300,305
PLIN1_HUMAN	PLIN1_HUMAN_1	125.129
PLIN1_HUMAN	PLIN1_HUMAN_2	496,498,503,515,521
NRIP1_HUMAN	NRIP1_HUMAN_0	861.862
NRIP1_HUMAN	NRIP1_HUMAN_1	101.103
NRIP1_HUMAN	NRIP1_HUMAN_2	1000.1
OTU6A_HUMAN	OTU6A_HUMAN_0	70.73
UBN2_HUMAN	UBN2_HUMAN_0	1114.11
UBN2_HUMAN	UBN2_HUMAN_1	249.251
UBN2_HUMAN	UBN2_HUMAN_2	10.12
SAHH2_HUMAN	SAHH2_HUMAN_0	67,70,71,73,76,83
DNM3B_HUMAN	DNM3B_HUMAN_0	50,51,52,97,99
JADE1_HUMAN	JADE1_HUMAN_0	809.811
JADE1_HUMAN	JADE1_HUMAN_1	7,9,12
TOM70_HUMAN	TOM70_HUMAN_0	84,90,95,109
C2C2L_HUMAN	C2C2L_HUMAN_0	58.67
C2C2L_HUMAN	C2C2L_HUMAN_1	410,416,419,420,421,425,427,429,463,467,469,474
C2C2L_HUMAN	C2C2L_HUMAN_2	612,618,620,622,630,637,659,661,671,673
GDIR2_HUMAN	GDIR2_HUMAN_0	19.23
RPAP3_HUMAN	RPAP3_HUMAN_0	110,113,115,118,120
NOL4_HUMAN	NOL4_HUMAN_0	352,359,360,362
NEP_HUMAN	NEP_HUMAN_0	3,5,10
ZFAN3_HUMAN	ZFAN3_HUMAN_0	121,123,128
PATL1_HUMAN	PATL1_HUMAN_0	176,177,178,183
PATL1_HUMAN	PATL1_HUMAN_1	277,279,290
ZN513_HUMAN	ZN513_HUMAN_0	84,95,98
AAKB2_HUMAN	AAKB2_HUMAN_0	38.39
DC1L1_HUMAN	DC1L1_HUMAN_0	388,397,404,407,411,413,414,420
DC1L1_HUMAN	DC1L1_HUMAN_1	507,509,511,512,514,515,517,522
DC1L1_HUMAN	DC1L1_HUMAN_2	206.212
PI3R4_HUMAN	PI3R4_HUMAN_0	852,860,864
RIPR2_HUMAN	RIPR2_HUMAN_0	18,20,32,36
NELFE_HUMAN	NELFE_HUMAN_0	35,36,41,48,50,88,90,112,114,130,134,138,139
NELFE_HUMAN	NELFE_HUMAN_1	248.25
RHG30_HUMAN	RHG30_HUMAN_0	986,987,995
CHD5_HUMAN	CHD5_HUMAN_0	1868.19
CNDH2_HUMAN	CNDH2_HUMAN_0	227.231
PLK4_HUMAN	PLK4_HUMAN_0	281,284,288,290,291,294,296,297,299,300,302,304
NDC80_HUMAN	NDC80_HUMAN_0	54,61,65,68
HNRH2_HUMAN	HNRH2_HUMAN_0	103.106
HNRH2_HUMAN	HNRH2_HUMAN_1	185,186,242,245,265,271
NONO_HUMAN	NONO_HUMAN_0	409,417,423,427,431
OSBL3_HUMAN	OSBL3_HUMAN_0	10,15,29,33
OSBL3_HUMAN	OSBL3_HUMAN_1	369,371,373
OSBL3_HUMAN	OSBL3_HUMAN_2	436.439
OSBL3_HUMAN	OSBL3_HUMAN_3	302,303,308,319,322
SRSF2_HUMAN	SRSF2_HUMAN_0	21,22,24,25
SRSF2_HUMAN	SRSF2_HUMAN_1	97.1
SRSF2_HUMAN	SRSF2_HUMAN_2	141,144,186,188,190,195,203,205,207,211,219,220
ABCA1_HUMAN	ABCA1_HUMAN_0	1285,1295,1304
CD34_HUMAN	CD34_HUMAN_0	328,329,338,340,345
ANKL2_HUMAN	ANKL2_HUMAN_0	913.917
ANKL2_HUMAN	ANKL2_HUMAN_1	801.806
ANKL2_HUMAN	ANKL2_HUMAN_2	258.267
TENS3_HUMAN	TENS3_HUMAN_0	570,578,583,584
TENS3_HUMAN	TENS3_HUMAN_1	849,854,865,872,873,876
TENS3_HUMAN	TENS3_HUMAN_2	940,943,951,952,966,968
TENS3_HUMAN	TENS3_HUMAN_3	683,686,689,691
TENS3_HUMAN	TENS3_HUMAN_4	775.779
PPME1_HUMAN	PPME1_HUMAN_0	6,14,21,26
MED24_HUMAN	MED24_HUMAN_0	861,862,871,872,874
MILK2_HUMAN	MILK2_HUMAN_0	657.659
MILK2_HUMAN	MILK2_HUMAN_1	142.152
ENOA_HUMAN	ENOA_HUMAN_0	262,269,271
SUFU_HUMAN	SUFU_HUMAN_0	341,345,348,351,352
WDR75_HUMAN	WDR75_HUMAN_0	778.781
NED4L_HUMAN	NED4L_HUMAN_0	301.302
NED4L_HUMAN	NED4L_HUMAN_1	334,339,341
NED4L_HUMAN	NED4L_HUMAN_2	445,447,448,450,463,472,474,478,482,484,486
ZN652_HUMAN	ZN652_HUMAN_0	99,102,196,202,203,215
HEXI1_HUMAN	HEXI1_HUMAN_0	232,235,236
NFAC4_HUMAN	NFAC4_HUMAN_0	167,169,212,216,225,263,271,280,284,288
STK10_HUMAN	STK10_HUMAN_0	449,453,454,458
STK10_HUMAN	STK10_HUMAN_1	951.953
LSM1_HUMAN	LSM1_HUMAN_0	122.128
TFAP4_HUMAN	TFAP4_HUMAN_0	120,122,123,138
LAR4B_HUMAN	LAR4B_HUMAN_0	497,500,509,510,513,515,517,523,525,531
LAR4B_HUMAN	LAR4B_HUMAN_1	598,600,625,628
LAR4B_HUMAN	LAR4B_HUMAN_2	731.735
TAF11_HUMAN	TAF11_HUMAN_0	6,8,73,74
SO4A1_HUMAN	SO4A1_HUMAN_0	26,29,33,36,39,42,45,53,54
NLGN2_HUMAN	NLGN2_HUMAN_0	712.717
CBY1_HUMAN	CBY1_HUMAN_0	8,19,25
ZYX_HUMAN	ZYX_HUMAN_0	168,169,277,280
AAPK2_HUMAN	AAPK2_HUMAN_0	480,484,490,499
SMRCD_HUMAN	SMRCD_HUMAN_0	33,38,53,56
SMRCD_HUMAN	SMRCD_HUMAN_1	94,95,97,102,123,126,131,136,145,151
SMRCD_HUMAN	SMRCD_HUMAN_2	210,211,212,213,238,241
SPT5H_HUMAN	SPT5H_HUMAN_0	665.67
SPT5H_HUMAN	SPT5H_HUMAN_1	772,774,777,779,781,788,790,798,805
SPT5H_HUMAN	SPT5H_HUMAN_2	1033.1
SPT5H_HUMAN	SPT5H_HUMAN_3	31.35
RREB1_HUMAN	RREB1_HUMAN_0	1133,1134,1173,1174
RREB1_HUMAN	RREB1_HUMAN_1	35.41
RREB1_HUMAN	RREB1_HUMAN_2	160,174,179
CNKR1_HUMAN	CNKR1_HUMAN_0	292,299,313
MYH7_HUMAN	MYH7_HUMAN_0	1136.11
MYH7_HUMAN	MYH7_HUMAN_1	1298,1301,1307
MYH7_HUMAN	MYH7_HUMAN_2	1365,1372,1374,1376,1382,1459,1464,1468,1469,1475,1477,1478,1487,1490,1496
MYH7_HUMAN	MYH7_HUMAN_3	1595,1599,1604,1606,1644,1647,1717,1721
MYH7_HUMAN	MYH7_HUMAN_4	1850,1851,1853,1890,1893
CERS2_HUMAN	CERS2_HUMAN_0	340,345,347,348
AKA11_HUMAN	AKA11_HUMAN_0	421,423,432,443,447
AKA11_HUMAN	AKA11_HUMAN_1	17.19
AKA11_HUMAN	AKA11_HUMAN_2	1099,1102,1103
AKA11_HUMAN	AKA11_HUMAN_3	1170.12
AKA11_HUMAN	AKA11_HUMAN_4	1012.1
CLOCK_HUMAN	CLOCK_HUMAN_0	405,407,426,428,430,445,450,460
STB5L_HUMAN	STB5L_HUMAN_0	590,595,598
STB5L_HUMAN	STB5L_HUMAN_1	819,821,822
ULK1_HUMAN	ULK1_HUMAN_0	449,458,459,464,466,467,468,476,478
ULK1_HUMAN	ULK1_HUMAN_1	532,537,543
ULK1_HUMAN	ULK1_HUMAN_2	622,624,635,637,638
ULK1_HUMAN	ULK1_HUMAN_3	715,716,718
ULK1_HUMAN	ULK1_HUMAN_4	757,760,763,774,780
DC1L2_HUMAN	DC1L2_HUMAN_0	388,390,393,401,406
DC1L2_HUMAN	DC1L2_HUMAN_1	442.445
CLD5_HUMAN	CLD5_HUMAN_0	206,211,216
RLF_HUMAN	RLF_HUMAN_0	1251,1252,1258,1272
RLF_HUMAN	RLF_HUMAN_1	631.633
STAG2_HUMAN	STAG2_HUMAN_0	1055,1057,1060,1063,1064,1108,1111
STAG2_HUMAN	STAG2_HUMAN_1	1176.12
SNX9_HUMAN	SNX9_HUMAN_0	175,176,180,193,199
GOGA4_HUMAN	GOGA4_HUMAN_0	36,38,39,40,42,70,73,77,95,97
UBP32_HUMAN	UBP32_HUMAN_0	1360,1362,1365,1370,1371,1375
SHB_HUMAN	SHB_HUMAN_0	245,246,264,267,271,296,298,306,309,311
SYAP1_HUMAN	SYAP1_HUMAN_0	268.272
NAKD2_HUMAN	NAKD2_HUMAN_0	356,362,366,375
NAKD2_HUMAN	NAKD2_HUMAN_1	182.187
SPTCS_HUMAN	SPTCS_HUMAN_0	1954,1955,1960
HNF1B_HUMAN	HNF1B_HUMAN_0	48,51,74,79
ITFG2_HUMAN	ITFG2_HUMAN_0	217.219
PDCD4_HUMAN	PDCD4_HUMAN_0	312.316
PDCD4_HUMAN	PDCD4_HUMAN_1	66,67,70,75,77,81,92,93
NUFP1_HUMAN	NUFP1_HUMAN_0	337,339,341,366,367
GATA3_HUMAN	GATA3_HUMAN_0	155,161,171
K1522_HUMAN	K1522_HUMAN_0	92.95
K1522_HUMAN	K1522_HUMAN_1	160.161
K1522_HUMAN	K1522_HUMAN_2	321,324,326,329,338,340,341,346
K1522_HUMAN	K1522_HUMAN_3	403,405,408
K1522_HUMAN	K1522_HUMAN_4	668,672,857,861
K1522_HUMAN	K1522_HUMAN_5	970,978,980
EGFR_HUMAN	EGFR_HUMAN_0	990,992,994,997
EGFR_HUMAN	EGFR_HUMAN_1	1031,1038,1040,1041,1056,1068,1069,1070,1073
EGFR_HUMAN	EGFR_HUMAN_2	1161,1165,1171
F1142_HUMAN	F1142_HUMAN_0	206.208
SHPS1_HUMAN	SHPS1_HUMAN_0	466.469
ATX1L_HUMAN	ATX1L_HUMAN_0	329.332
KANL1_HUMAN	KANL1_HUMAN_0	267.27
KANL1_HUMAN	KANL1_HUMAN_1	990,993,1002,1008
KANL1_HUMAN	KANL1_HUMAN_2	1080.11
KANL1_HUMAN	KANL1_HUMAN_3	819,827,829
TAF10_HUMAN	TAF10_HUMAN_0	43.47
CALU_HUMAN	CALU_HUMAN_0	34,46,59,64,68
CCD82_HUMAN	CCD82_HUMAN_0	191,194,197
DGKQ_HUMAN	DGKQ_HUMAN_0	16,21,25
KAT7_HUMAN	KAT7_HUMAN_0	38,44,49,51,52,55,56,84,87,96,98,99,101,103,110,117,123,127,129,137,157,161,163,166,177
PHLP_HUMAN	PHLP_HUMAN_0	15,16,17,18,19,24
PHLP_HUMAN	PHLP_HUMAN_1	289,292,295
PP14D_HUMAN	PP14D_HUMAN_0	32.33
HPS5_HUMAN	HPS5_HUMAN_0	436,438,442,460,462
FA92A_HUMAN	FA92A_HUMAN_0	240.242
MET_HUMAN	MET_HUMAN_0	984,989,996,999,1002
ODPA_HUMAN	ODPA_HUMAN_0	230.231
ODPA_HUMAN	ODPA_HUMAN_1	292,294,299,300,302
TBA4A_HUMAN	TBA4A_HUMAN_0	418,431,438
EHD2_HUMAN	EHD2_HUMAN_0	467.469
CNNM3_HUMAN	CNNM3_HUMAN_0	687,690,699
CNNM3_HUMAN	CNNM3_HUMAN_1	594.598
STA13_HUMAN	STA13_HUMAN_0	571.576
STA13_HUMAN	STA13_HUMAN_1	410,413,415,429
AGRL1_HUMAN	AGRL1_HUMAN_0	1384.14
BNC1_HUMAN	BNC1_HUMAN_0	561,562,572
NUFP2_HUMAN	NUFP2_HUMAN_0	111.112
NUFP2_HUMAN	NUFP2_HUMAN_1	570.571
NUFP2_HUMAN	NUFP2_HUMAN_2	628,630,632,636
NUFP2_HUMAN	NUFP2_HUMAN_3	211,213,215,217,218,219
ABR_HUMAN	ABR_HUMAN_0	52,56,71
ABR_HUMAN	ABR_HUMAN_1	635.637
EPN1_HUMAN	EPN1_HUMAN_0	415,416,418,419
EPN1_HUMAN	EPN1_HUMAN_1	453,459,461,469,472
AIFM1_HUMAN	AIFM1_HUMAN_0	518.523
AIFM1_HUMAN	AIFM1_HUMAN_1	115.117
ANS4B_HUMAN	ANS4B_HUMAN_0	183.188
JUND_HUMAN	JUND_HUMAN_0	89.99
JUND_HUMAN	JUND_HUMAN_1	244,254,258,264
VAV_HUMAN	VAV_HUMAN_0	840,841,843
BI2L1_HUMAN	BI2L1_HUMAN_0	247,250,251,254,256,260,273,275,277,280,328,330,333
BI2L1_HUMAN	BI2L1_HUMAN_1	411,413,419,421,422
NVL_HUMAN	NVL_HUMAN_0	190,194,210,214
NVL_HUMAN	NVL_HUMAN_1	837.839
MRP3_HUMAN	MRP3_HUMAN_0	907,910,911
NRF1_HUMAN	NRF1_HUMAN_0	38,43,46
GAS2_HUMAN	GAS2_HUMAN_0	281.287
GAS2_HUMAN	GAS2_HUMAN_1	182,184,186,189
DEN1B_HUMAN	DEN1B_HUMAN_0	651.652
DEN1B_HUMAN	DEN1B_HUMAN_1	589.595
DEN1B_HUMAN	DEN1B_HUMAN_2	513,519,548,551
NHRF3_HUMAN	NHRF3_HUMAN_0	504,507,509,510,511,513
CD3Z_HUMAN	CD3Z_HUMAN_0	122,123,141,145,151,152
T184B_HUMAN	T184B_HUMAN_0	385,387,397,401,402
VIPR1_HUMAN	VIPR1_HUMAN_0	446,447,448,454
OSBL8_HUMAN	OSBL8_HUMAN_0	797,798,806,807,809,813,817,818
OSBL8_HUMAN	OSBL8_HUMAN_1	53,62,64,67,70,88,90
OSBL8_HUMAN	OSBL8_HUMAN_2	304,313,327,330,341
PAR3L_HUMAN	PAR3L_HUMAN_0	132.14
PAR3L_HUMAN	PAR3L_HUMAN_1	727,729,743,744,745,748
PAR3L_HUMAN	PAR3L_HUMAN_2	337,345,351,362,367
NC2B_HUMAN	NC2B_HUMAN_0	104.105
UBP37_HUMAN	UBP37_HUMAN_0	649.651
MP2K2_HUMAN	MP2K2_HUMAN_0	22,24,25,29
MP2K2_HUMAN	MP2K2_HUMAN_1	292,294,305
MP2K2_HUMAN	MP2K2_HUMAN_2	393.395
F234B_HUMAN	F234B_HUMAN_0	29.32
SYEP_HUMAN	SYEP_HUMAN_0	997.998
PDS5A_HUMAN	PDS5A_HUMAN_0	1176,1181,1186,1194,1205,1207,1275,1277
FOXO3_HUMAN	FOXO3_HUMAN_0	279,283,293,298,310,314,317,320,412,420,424,426
FOXO3_HUMAN	FOXO3_HUMAN_1	6.11
SRS11_HUMAN	SRS11_HUMAN_0	206,208,211
SRS11_HUMAN	SRS11_HUMAN_1	294,296,322,324,335,337,339,347,349,351,353,359,365,367,369,411,413,431,433
MEX3D_HUMAN	MEX3D_HUMAN_0	505,509,513
HID1_HUMAN	HID1_HUMAN_0	588,590,592
FBSL_HUMAN	FBSL_HUMAN_0	30,32,33
KIT_HUMAN	KIT_HUMAN_0	702,717,720,728,729
U2AFM_HUMAN	U2AFM_HUMAN_0	383,387,388
ADA2A_HUMAN	ADA2A_HUMAN_0	323.33
TFE2_HUMAN	TFE2_HUMAN_0	133,138,340,344,345,349,351,353,354,358,365,366,378
PSD2_HUMAN	PSD2_HUMAN_0	522.531
RHG07_HUMAN	RHG07_HUMAN_0	522.525
RHG07_HUMAN	RHG07_HUMAN_1	841.849
RHG07_HUMAN	RHG07_HUMAN_2	985,990,992
RHG07_HUMAN	RHG07_HUMAN_3	732,737,739,746,749,754,756,765
WIZ_HUMAN	WIZ_HUMAN_0	967,981,982,995,997,1005,1009,1011,1016
WIZ_HUMAN	WIZ_HUMAN_1	1308,1313,1334,1336
WIZ_HUMAN	WIZ_HUMAN_2	1516.15
WIZ_HUMAN	WIZ_HUMAN_3	1126,1128,1133,1145,1150,1154
ABCF1_HUMAN	ABCF1_HUMAN_0	415.421
ABCF1_HUMAN	ABCF1_HUMAN_1	20,21,104,108
NFAM1_HUMAN	NFAM1_HUMAN_0	219.227
1433G_HUMAN	1433G_HUMAN_0	64.7
SNF5_HUMAN	SNF5_HUMAN_0	128.133
SRGP3_HUMAN	SRGP3_HUMAN_0	836,844,857,867,873
SRGP3_HUMAN	SRGP3_HUMAN_1	918.921
SRGP3_HUMAN	SRGP3_HUMAN_2	1069,1070,1077,1081
TRAD1_HUMAN	TRAD1_HUMAN_0	551.557
PNKP_HUMAN	PNKP_HUMAN_0	113,117,121
NOM1_HUMAN	NOM1_HUMAN_0	319.32
SPY1_HUMAN	SPY1_HUMAN_0	49.52
PLCH2_HUMAN	PLCH2_HUMAN_0	486.49
DDX50_HUMAN	DDX50_HUMAN_0	34,38,40
DDX50_HUMAN	DDX50_HUMAN_1	111.112
MLX_HUMAN	MLX_HUMAN_0	44.47
MLX_HUMAN	MLX_HUMAN_1	109.114
NHRF1_HUMAN	NHRF1_HUMAN_0	268,279,287,289,290,292,293,298,301,338,339
CNOT2_HUMAN	CNOT2_HUMAN_0	89,92,125,127,142,156,158,159,164,168,169,241,245
TAF3_HUMAN	TAF3_HUMAN_0	182,198,199,203
TAF3_HUMAN	TAF3_HUMAN_1	290,296,300
TAF3_HUMAN	TAF3_HUMAN_2	495,497,500
SLIK4_HUMAN	SLIK4_HUMAN_0	735.74
MIO_HUMAN	MIO_HUMAN_0	758,763,765
NCOR2_HUMAN	NCOR2_HUMAN_0	1782,1785,1862,1868,1871
NCOR2_HUMAN	NCOR2_HUMAN_1	2056,2064,2067,2068,2070,2072,2087
NCOR2_HUMAN	NCOR2_HUMAN_2	1258.13
NCOR2_HUMAN	NCOR2_HUMAN_3	1482.15
NCOR2_HUMAN	NCOR2_HUMAN_4	549,552,553
NCOR2_HUMAN	NCOR2_HUMAN_5	744,745,749,752,938,942
NCOR2_HUMAN	NCOR2_HUMAN_6	1017,1022,1024
NCOR2_HUMAN	NCOR2_HUMAN_7	2462,2463,2521,2523
NCOR2_HUMAN	NCOR2_HUMAN_8	2204,2207,2213
NCOR2_HUMAN	NCOR2_HUMAN_9	2268.23
NCOR2_HUMAN	NCOR2_HUMAN_10	148,151,214,220
EXOC1_HUMAN	EXOC1_HUMAN_0	444,450,462,469,470,471,472,477,486,490,498,500
AKNA_HUMAN	AKNA_HUMAN_0	1421.14
GOLI4_HUMAN	GOLI4_HUMAN_0	639.64
TGM2_HUMAN	TGM2_HUMAN_0	211.215
QKI_HUMAN	QKI_HUMAN_0	242.244
FIP1_HUMAN	FIP1_HUMAN_0	84,86,88
FIP1_HUMAN	FIP1_HUMAN_1	257,258,261
FIP1_HUMAN	FIP1_HUMAN_2	481,491,493,495,499,504,547,553,558
AT8B1_HUMAN	AT8B1_HUMAN_0	1203,1208,1216
SYNPO_HUMAN	SYNPO_HUMAN_0	753,755,757,776,778,782,786,788,818,827,832,837,838,853,862,863,867,881,884,892,894,908
AF17_HUMAN	AF17_HUMAN_0	217,219,221
S12A6_HUMAN	S12A6_HUMAN_0	28,30,31,46,49
S12A6_HUMAN	S12A6_HUMAN_1	1022,1027,1028,1031,1047,1049,1063
NR2C1_HUMAN	NR2C1_HUMAN_0	214.219
NISCH_HUMAN	NISCH_HUMAN_0	1281.13
NISCH_HUMAN	NISCH_HUMAN_1	540.545
NIPBL_HUMAN	NIPBL_HUMAN_0	145,147,149
NIPBL_HUMAN	NIPBL_HUMAN_1	254,255,268,273,279,283,286,298,300,304,305
NIPBL_HUMAN	NIPBL_HUMAN_2	349,351,362,366
NIPBL_HUMAN	NIPBL_HUMAN_3	701,708,712
NIPBL_HUMAN	NIPBL_HUMAN_4	1076,1084,1088,1089,1095,1149,1151,1153,1158,1159
NIPBL_HUMAN	NIPBL_HUMAN_5	2651,2657,2662,2666,2671
NIPBL_HUMAN	NIPBL_HUMAN_6	2489,2490,2492,2508,2510,2512,2514
GASP2_HUMAN	GASP2_HUMAN_0	281.283
NFM_HUMAN	NFM_HUMAN_0	27,29,43
NFM_HUMAN	NFM_HUMAN_1	544,552,557,558
NFM_HUMAN	NFM_HUMAN_2	747.749
LIPA3_HUMAN	LIPA3_HUMAN_0	507.511
LIPA3_HUMAN	LIPA3_HUMAN_1	713.717
LIPA3_HUMAN	LIPA3_HUMAN_2	1104,1111,1126,1128
RHG22_HUMAN	RHG22_HUMAN_0	393.394
ATR_HUMAN	ATR_HUMAN_0	427.434
IASPP_HUMAN	IASPP_HUMAN_0	80,83,101,109,112,119,122,182,186
IASPP_HUMAN	IASPP_HUMAN_1	331,334,340
NCF1_HUMAN	NCF1_HUMAN_0	302,314,319,327
TAB1_HUMAN	TAB1_HUMAN_0	6,10,15
TBC16_HUMAN	TBC16_HUMAN_0	98,101,102,117,125
TBC16_HUMAN	TBC16_HUMAN_1	382.383
ABI3_HUMAN	ABI3_HUMAN_0	164,169,212,215
SCEL_HUMAN	SCEL_HUMAN_0	88.9
F1712_HUMAN	F1712_HUMAN_0	369.371
F1712_HUMAN	F1712_HUMAN_1	788.79
KPB2_HUMAN	KPB2_HUMAN_0	728.734
KPB2_HUMAN	KPB2_HUMAN_1	968,977,978,982
KPB2_HUMAN	KPB2_HUMAN_2	1040,1042,1043
PYGO2_HUMAN	PYGO2_HUMAN_0	39,47,49
TICRR_HUMAN	TICRR_HUMAN_0	922.924
TICRR_HUMAN	TICRR_HUMAN_1	1060.11
MRE11_HUMAN	MRE11_HUMAN_0	675,677,687
NFAC1_HUMAN	NFAC1_HUMAN_0	232,236,240,244,256,260,268
NECT3_HUMAN	NECT3_HUMAN_0	509.51
SP3_HUMAN	SP3_HUMAN_0	562.565
CSKI2_HUMAN	CSKI2_HUMAN_0	694,696,699,799,801,824,825,827
CSKI2_HUMAN	CSKI2_HUMAN_1	876.877
CSKI2_HUMAN	CSKI2_HUMAN_2	395,402,405,408
HECD4_HUMAN	HECD4_HUMAN_0	1104.11
PARN_HUMAN	PARN_HUMAN_0	569,582,586,588
SASH1_HUMAN	SASH1_HUMAN_0	386,388,398,404,406
SASH1_HUMAN	SASH1_HUMAN_1	506.509
SASH1_HUMAN	SASH1_HUMAN_2	698,700,717,720,724,727,729
SASH1_HUMAN	SASH1_HUMAN_3	836.838
SASH1_HUMAN	SASH1_HUMAN_4	1024,1027,1030
NAT6_HUMAN	NAT6_HUMAN_0	6.7
PYR1_HUMAN	PYR1_HUMAN_0	1822,1826,1827,1830,1831,1832
GPSM1_HUMAN	GPSM1_HUMAN_0	468,470,491,492
GPSM1_HUMAN	GPSM1_HUMAN_1	568.571
CRK_HUMAN	CRK_HUMAN_0	39,40,41,42,73,82,84
CRK_HUMAN	CRK_HUMAN_1	120.124
CRK_HUMAN	CRK_HUMAN_2	193,197,207,220,224,227
KANL3_HUMAN	KANL3_HUMAN_0	510,514,526,535,539
RBM18_HUMAN	RBM18_HUMAN_0	160,166,167
FSD1L_HUMAN	FSD1L_HUMAN_0	519.522
PKHF2_HUMAN	PKHF2_HUMAN_0	225,226,238,246,247
SHRM3_HUMAN	SHRM3_HUMAN_0	433,438,442
SHRM3_HUMAN	SHRM3_HUMAN_1	675.676
SHRM3_HUMAN	SHRM3_HUMAN_2	889,890,909,912
SHRM3_HUMAN	SHRM3_HUMAN_3	1068,1071,1073
E2F8_HUMAN	E2F8_HUMAN_0	415.416
CSF3R_HUMAN	CSF3R_HUMAN_0	782.786
SNIP1_HUMAN	SNIP1_HUMAN_0	393.395
SNIP1_HUMAN	SNIP1_HUMAN_1	34,51,53
ZC3H1_HUMAN	ZC3H1_HUMAN_0	948,951,952
ZC3H1_HUMAN	ZC3H1_HUMAN_1	1297,1300,1302,1303
ZC3H1_HUMAN	ZC3H1_HUMAN_2	201,205,207,351,353
ZC3H1_HUMAN	ZC3H1_HUMAN_3	713,716,718
ZC3H1_HUMAN	ZC3H1_HUMAN_4	804.808
LIPB2_HUMAN	LIPB2_HUMAN_0	384,386,509,511,532,538
ZN593_HUMAN	ZN593_HUMAN_0	131,132,133
ZN703_HUMAN	ZN703_HUMAN_0	296.298
AGRG6_HUMAN	AGRG6_HUMAN_0	1164.12
LRCH1_HUMAN	LRCH1_HUMAN_0	531,535,537
IF5_HUMAN	IF5_HUMAN_0	388,389,404,405,409,418
EIF3C_HUMAN	EIF3C_HUMAN_0	523.531
EIF3C_HUMAN	EIF3C_HUMAN_1	880.883
EIF3C_HUMAN	EIF3C_HUMAN_2	5,8,10,12,14,15,17,38,44
EIF3C_HUMAN	EIF3C_HUMAN_3	165,177,180,181
ACTC_HUMAN	ACTC_HUMAN_0	53.54
ACTC_HUMAN	ACTC_HUMAN_1	234,240,241
RYR1_HUMAN	RYR1_HUMAN_0	4323.43
RYR1_HUMAN	RYR1_HUMAN_1	2842.28
CP250_HUMAN	CP250_HUMAN_0	2321.23
RTKN_HUMAN	RTKN_HUMAN_0	517.519
RTKN_HUMAN	RTKN_HUMAN_1	105,107,114
NUSAP_HUMAN	NUSAP_HUMAN_0	147.148
SUV92_HUMAN	SUV92_HUMAN_0	383.387
RLGPB_HUMAN	RLGPB_HUMAN_0	358,362,377,378
RLGPB_HUMAN	RLGPB_HUMAN_1	719,722,725,733
MLF2_HUMAN	MLF2_HUMAN_0	143,145,151
MLF2_HUMAN	MLF2_HUMAN_1	237,239,242
GTSE1_HUMAN	GTSE1_HUMAN_0	66.71
GTSE1_HUMAN	GTSE1_HUMAN_1	137,140,310,311,312
GTSE1_HUMAN	GTSE1_HUMAN_2	460,465,476,478,487,488,494
GTSE1_HUMAN	GTSE1_HUMAN_3	698,704,714
RPA34_HUMAN	RPA34_HUMAN_0	162,170,171
ZC3H4_HUMAN	ZC3H4_HUMAN_0	91,93,154,157,158
ZC3H4_HUMAN	ZC3H4_HUMAN_1	801,805,806,807,903,906,907
ZC3H4_HUMAN	ZC3H4_HUMAN_2	1107,1109,1113,1117
ZC3H4_HUMAN	ZC3H4_HUMAN_3	1264,1266,1268,1274,1285,1298
AVEN_HUMAN	AVEN_HUMAN_0	93.97
MYOF_HUMAN	MYOF_HUMAN_0	171.173
LRP6_HUMAN	LRP6_HUMAN_0	1489.15
STXB5_HUMAN	STXB5_HUMAN_0	899,901,905
STXB5_HUMAN	STXB5_HUMAN_1	718,722,758,761,773,775,777,779,781,783,784
SR140_HUMAN	SR140_HUMAN_0	918,920,929,930,931,933,935,937,939,945,947,950
SR140_HUMAN	SR140_HUMAN_1	1013.1
DYN1_HUMAN	DYN1_HUMAN_0	773,775,776,777,779
DYN1_HUMAN	DYN1_HUMAN_1	850.856
DYN1_HUMAN	DYN1_HUMAN_2	301.305
PP2BA_HUMAN	PP2BA_HUMAN_0	491.497
CNKR3_HUMAN	CNKR3_HUMAN_0	380,382,397
UH1BL_HUMAN	UH1BL_HUMAN_0	413,417,419,422,426
UH1BL_HUMAN	UH1BL_HUMAN_1	888,890,932,934,938,952,954,961
MRP1_HUMAN	MRP1_HUMAN_0	914,916,917,918,920,929
EF1A1_HUMAN	EF1A1_HUMAN_0	451.453
CAC1E_HUMAN	CAC1E_HUMAN_0	2052.21
MGP_HUMAN	MGP_HUMAN_0	24.27
AMPH_HUMAN	AMPH_HUMAN_0	249,259,261,267,271,275,284,292,294,309,311
FETUA_HUMAN	FETUA_HUMAN_0	324,327,329
FETUA_HUMAN	FETUA_HUMAN_1	133,134,137
SNX14_HUMAN	SNX14_HUMAN_0	486,499,507
ST65G_HUMAN	ST65G_HUMAN_0	103.107
DMAP1_HUMAN	DMAP1_HUMAN_0	444,447,453,455,456
SLTM_HUMAN	SLTM_HUMAN_0	73,79,92,96
SLTM_HUMAN	SLTM_HUMAN_1	343.344
SLTM_HUMAN	SLTM_HUMAN_2	542,549,550,552
DOCK4_HUMAN	DOCK4_HUMAN_0	1807,1809,1814
TRAF7_HUMAN	TRAF7_HUMAN_0	58,60,62,63,85,87,90,93,96,107
NAA30_HUMAN	NAA30_HUMAN_0	189.195
CEP89_HUMAN	CEP89_HUMAN_0	39.43
MKNK2_HUMAN	MKNK2_HUMAN_0	436,439,451
MKNK2_HUMAN	MKNK2_HUMAN_1	71.73
YETS2_HUMAN	YETS2_HUMAN_0	117,119,131
YETS2_HUMAN	YETS2_HUMAN_1	464,467,468,472
IF4H_HUMAN	IF4H_HUMAN_0	216,219,229
IF4H_HUMAN	IF4H_HUMAN_1	11,13,20,23
JMY_HUMAN	JMY_HUMAN_0	887.888
CALD1_HUMAN	CALD1_HUMAN_0	722,723,725,729
CALD1_HUMAN	CALD1_HUMAN_1	782,787,788,790
CN093_HUMAN	CN093_HUMAN_0	113,117,129
FOXP1_HUMAN	FOXP1_HUMAN_0	649.657
PRIC2_HUMAN	PRIC2_HUMAN_0	533,538,542
PRIC2_HUMAN	PRIC2_HUMAN_1	692.694
PRIC2_HUMAN	PRIC2_HUMAN_2	805.812
FLNB_HUMAN	FLNB_HUMAN_0	2477,2480,2501,2502
FLNB_HUMAN	FLNB_HUMAN_1	2099.21
RN123_HUMAN	RN123_HUMAN_0	693.699
CLD1_HUMAN	CLD1_HUMAN_0	204.205
COR1B_HUMAN	COR1B_HUMAN_0	398,406,412
SH3R1_HUMAN	SH3R1_HUMAN_0	723,726,734,738,740
SNX27_HUMAN	SNX27_HUMAN_0	48.5
SOX2_HUMAN	SOX2_HUMAN_0	124.125
RBM14_HUMAN	RBM14_HUMAN_0	205,214,219,224,225
RBM14_HUMAN	RBM14_HUMAN_1	277,279,519,522,526,570,571,575,578,581,611,617,619,622,626,628,631,642,644,648
LRBA_HUMAN	LRBA_HUMAN_0	1246.12
LRBA_HUMAN	LRBA_HUMAN_1	1604,1610,1612
LRBA_HUMAN	LRBA_HUMAN_2	1766.18
GBG12_HUMAN	GBG12_HUMAN_0	1,6,7
SYCP2_HUMAN	SYCP2_HUMAN_0	477.48
SYCP2_HUMAN	SYCP2_HUMAN_1	1252.13
TCTP_HUMAN	TCTP_HUMAN_0	45,52,63
RFC1_HUMAN	RFC1_HUMAN_0	66,68,70,72,104,107,109
RFC1_HUMAN	RFC1_HUMAN_1	359,365,367
AMOL2_HUMAN	AMOL2_HUMAN_0	156,158,165
AMOL2_HUMAN	AMOL2_HUMAN_1	758.761
S4A7_HUMAN	S4A7_HUMAN_0	399.402
FUS_HUMAN	FUS_HUMAN_0	272.276
GEN_HUMAN	GEN_HUMAN_0	800.801
SRRT_HUMAN	SRRT_HUMAN_0	539,543,548,549
ST32C_HUMAN	ST32C_HUMAN_0	9,10,17
GMIP_HUMAN	GMIP_HUMAN_0	433,436,438,439,440
GMIP_HUMAN	GMIP_HUMAN_1	233.242
WDR91_HUMAN	WDR91_HUMAN_0	251.255
CNDD3_HUMAN	CNDD3_HUMAN_0	1381.14
H2A3_HUMAN	H2A3_HUMAN_0	120.122
CT2NL_HUMAN	CT2NL_HUMAN_0	480,483,487,489,522,526,548,556,559,562,567,569
NSF_HUMAN	NSF_HUMAN_0	459.46
DDIT3_HUMAN	DDIT3_HUMAN_0	29,30,78,81
BAP1_HUMAN	BAP1_HUMAN_0	516,519,520
RGL2_HUMAN	RGL2_HUMAN_0	616.618
R3GEF_HUMAN	R3GEF_HUMAN_0	65,66,67,163,164,167,178,180,193
LAT_HUMAN	LAT_HUMAN_0	219.223
LAT_HUMAN	LAT_HUMAN_1	38,39,40,42,83,90,100,105,108
MPIP3_HUMAN	MPIP3_HUMAN_0	190.197
RRP1B_HUMAN	RRP1B_HUMAN_0	705.707
TSSC4_HUMAN	TSSC4_HUMAN_0	59.66
WIPF1_HUMAN	WIPF1_HUMAN_0	339,341,349
WWTR1_HUMAN	WWTR1_HUMAN_0	306.313
WWTR1_HUMAN	WWTR1_HUMAN_1	59,61,64,65,68,69,88,89,92
PRR5_HUMAN	PRR5_HUMAN_0	237,239,251,253
FOXN3_HUMAN	FOXN3_HUMAN_0	82,84,96
INADL_HUMAN	INADL_HUMAN_0	453,454,458
ZN106_HUMAN	ZN106_HUMAN_0	858,860,863
ZN106_HUMAN	ZN106_HUMAN_1	1020,1024,1025
ZN106_HUMAN	ZN106_HUMAN_2	1278,1280,1283
ZN106_HUMAN	ZN106_HUMAN_3	1369.14
PR38B_HUMAN	PR38B_HUMAN_0	259,261,265,267,271,287,289,317,319
PR38B_HUMAN	PR38B_HUMAN_1	470,472,474,480,490,492,526,528,533
P55G_HUMAN	P55G_HUMAN_0	194,198,201,202
DAPK3_HUMAN	DAPK3_HUMAN_0	305,310,311,317
TLE1_HUMAN	TLE1_HUMAN_0	283.285
TBCD4_HUMAN	TBCD4_HUMAN_0	313,316,317,340,343
TBCD4_HUMAN	TBCD4_HUMAN_1	565,567,568,569,587,590,596,599,608,612,616,632,641,643
TBCD4_HUMAN	TBCD4_HUMAN_2	748,749,750,751,753,756,762,765,781,786
PTMA_HUMAN	PTMA_HUMAN_0	1,7,8,9,12,13
ANCHR_HUMAN	ANCHR_HUMAN_0	289.292
RGPA2_HUMAN	RGPA2_HUMAN_0	485,487,491
RGPA2_HUMAN	RGPA2_HUMAN_1	693,695,700
RGPA2_HUMAN	RGPA2_HUMAN_2	818,819,820
RGPA2_HUMAN	RGPA2_HUMAN_3	361,364,367,372,374,375,378
SRGP1_HUMAN	SRGP1_HUMAN_0	905,916,925,931,939,1000,1003,1005,1009,1026,1027
SRGP1_HUMAN	SRGP1_HUMAN_1	406.415
SGSM1_HUMAN	SGSM1_HUMAN_0	700.701
UBP31_HUMAN	UBP31_HUMAN_0	1108.11
LYSM2_HUMAN	LYSM2_HUMAN_0	23,28,30,32
MCPH1_HUMAN	MCPH1_HUMAN_0	332.334
SPTB2_HUMAN	SPTB2_HUMAN_0	2101,2106,2109,2114,2127,2137,2146,2147,2158,2159,2160,2163,2164,2168,2170,2183,2186,2194
SPTB2_HUMAN	SPTB2_HUMAN_1	2313,2315,2316,2318,2319,2322,2323,2327,2331,2334,2336,2339,2340
SPTB2_HUMAN	SPTB2_HUMAN_2	776,777,778,780
SPTB2_HUMAN	SPTB2_HUMAN_3	1075.11
PTPRK_HUMAN	PTPRK_HUMAN_0	855.857
MOV10_HUMAN	MOV10_HUMAN_0	968,970,971
XPR1_HUMAN	XPR1_HUMAN_0	659,665,667,675,689
SMD2_HUMAN	SMD2_HUMAN_0	1,8,11
RAD17_HUMAN	RAD17_HUMAN_0	645.655
CD019_HUMAN	CD019_HUMAN_0	37.46
OGRL1_HUMAN	OGRL1_HUMAN_0	329,333,340
RNF4_HUMAN	RNF4_HUMAN_0	93.94
PITM3_HUMAN	PITM3_HUMAN_0	494.503
PITM3_HUMAN	PITM3_HUMAN_1	29.3
C43BP_HUMAN	C43BP_HUMAN_0	118,122,125,131,134
C43BP_HUMAN	C43BP_HUMAN_1	371,372,374,376,378,379
PEAK1_HUMAN	PEAK1_HUMAN_0	778,785,791,796
PEAK1_HUMAN	PEAK1_HUMAN_1	875.879
PEAK1_HUMAN	PEAK1_HUMAN_2	503.506
PEAK1_HUMAN	PEAK1_HUMAN_3	567,571,573,586
PEAK1_HUMAN	PEAK1_HUMAN_4	1213,1214,1216,1249,1252
PEAK1_HUMAN	PEAK1_HUMAN_5	1105.11
PEAK1_HUMAN	PEAK1_HUMAN_6	211.213
CCD47_HUMAN	CCD47_HUMAN_0	420.43
NSD1_HUMAN	NSD1_HUMAN_0	482.485
NSD1_HUMAN	NSD1_HUMAN_1	2363.24
OPA1_HUMAN	OPA1_HUMAN_0	343.344
GRM2B_HUMAN	GRM2B_HUMAN_0	219,220,224
GRM2B_HUMAN	GRM2B_HUMAN_1	43,48,57,71
ARGL1_HUMAN	ARGL1_HUMAN_0	55,57,59,75,76
H2B1L_HUMAN	H2B1L_HUMAN_0	83.87
H2B1L_HUMAN	H2B1L_HUMAN_1	112,115,122
BRWD1_HUMAN	BRWD1_HUMAN_0	686.695
BRWD1_HUMAN	BRWD1_HUMAN_1	2163.22
BRWD1_HUMAN	BRWD1_HUMAN_2	1604,1606,1677,1682,1685,1754,1755,1785,1787,1792,1819,1821,1903,1904
ESYT1_HUMAN	ESYT1_HUMAN_0	958.962
SZT2_HUMAN	SZT2_HUMAN_0	2953.3
SZT2_HUMAN	SZT2_HUMAN_1	698.702
SZT2_HUMAN	SZT2_HUMAN_2	1641,1644,1650
SZT2_HUMAN	SZT2_HUMAN_3	2433.24
R3HD1_HUMAN	R3HD1_HUMAN_0	253,260,261
R3HD1_HUMAN	R3HD1_HUMAN_1	298,301,304
R3HD1_HUMAN	R3HD1_HUMAN_2	379,380,382
R3HD1_HUMAN	R3HD1_HUMAN_3	972.973
R3HD1_HUMAN	R3HD1_HUMAN_4	137,140,141,144
NU153_HUMAN	NU153_HUMAN_0	191,202,208,216,218,256,259
NU153_HUMAN	NU153_HUMAN_1	329,332,333,337
NU153_HUMAN	NU153_HUMAN_2	514,515,519,521,528,606,613,618
SRS12_HUMAN	SRS12_HUMAN_0	104,106,218,222,226
STX8_HUMAN	STX8_HUMAN_0	159.162
NPM_HUMAN	NPM_HUMAN_0	138,142,194,198,216,217,218,221,226,233,236,241,242,253,259
NPM_HUMAN	NPM_HUMAN_1	3.9
VAMP4_HUMAN	VAMP4_HUMAN_0	87,89,91
APBA2_HUMAN	APBA2_HUMAN_0	235.237
S35C2_HUMAN	S35C2_HUMAN_0	334.335
S12A5_HUMAN	S12A5_HUMAN_0	53.56
ACTBL_HUMAN	ACTBL_HUMAN_0	239.24
NUDC_HUMAN	NUDC_HUMAN_0	135.138
ZFAN6_HUMAN	ZFAN6_HUMAN_0	42.48
SMAD9_HUMAN	SMAD9_HUMAN_0	463,464,466
CDC37_HUMAN	CDC37_HUMAN_0	117.119
CDC37_HUMAN	CDC37_HUMAN_1	297.299
NFXL1_HUMAN	NFXL1_HUMAN_0	105,106,107,108
LSR_HUMAN	LSR_HUMAN_0	308,320,322,325
LSR_HUMAN	LSR_HUMAN_1	431.435
LSR_HUMAN	LSR_HUMAN_2	504,507,511,522,527,529,534
LSR_HUMAN	LSR_HUMAN_3	642.645
VIME_HUMAN	VIME_HUMAN_0	408,411,418,419,425,429,435,437,457,458
VIME_HUMAN	VIME_HUMAN_1	275.277
VIME_HUMAN	VIME_HUMAN_2	324.326
VIME_HUMAN	VIME_HUMAN_3	2,4,6,7,8,9,10,21,24,25,28,33,37,38,41,46,47,48,50,52,54,55,60,62,64,65,71,72
VIME_HUMAN	VIME_HUMAN_4	201,204,213,225
ROCK2_HUMAN	ROCK2_HUMAN_0	1360,1361,1365,1373,1378,1387
ROCK2_HUMAN	ROCK2_HUMAN_1	721.723
BCL9_HUMAN	BCL9_HUMAN_0	101,103,106,114,152,154,156,160
BCL9_HUMAN	BCL9_HUMAN_1	686.688
TIF1B_HUMAN	TIF1B_HUMAN_0	13,16,18,25,44,48,49
TIF1B_HUMAN	TIF1B_HUMAN_1	822.823
TIF1B_HUMAN	TIF1B_HUMAN_2	593,595,597,598,599,600,611,623
TIF1B_HUMAN	TIF1B_HUMAN_3	470.472
TIF1B_HUMAN	TIF1B_HUMAN_4	751,754,755,756
ITBP1_HUMAN	ITBP1_HUMAN_0	10,12,24,27,28,33,37,40
VPS50_HUMAN	VPS50_HUMAN_0	491,493,495,497,499
VPS50_HUMAN	VPS50_HUMAN_1	556,558,560
VPS50_HUMAN	VPS50_HUMAN_2	14.18
PCX3_HUMAN	PCX3_HUMAN_0	126,128,134
NCBP3_HUMAN	NCBP3_HUMAN_0	9,24,29
NCBP3_HUMAN	NCBP3_HUMAN_1	412.414
NCBP3_HUMAN	NCBP3_HUMAN_2	208.209
SGTB_HUMAN	SGTB_HUMAN_0	294.296
RPA43_HUMAN	RPA43_HUMAN_0	299,301,303,315,327
TBB5_HUMAN	TBB5_HUMAN_0	35.39
S4A10_HUMAN	S4A10_HUMAN_0	275,279,280
S4A10_HUMAN	S4A10_HUMAN_1	88.9
FAK1_HUMAN	FAK1_HUMAN_0	575,576,579
FAK1_HUMAN	FAK1_HUMAN_1	704,707,715,721,731
FAK1_HUMAN	FAK1_HUMAN_2	23.28
FAK1_HUMAN	FAK1_HUMAN_3	839.842
FAK1_HUMAN	FAK1_HUMAN_4	909,913,924
FAK1_HUMAN	FAK1_HUMAN_5	396.406
AT1A2_HUMAN	AT1A2_HUMAN_0	214,219,223
LRSM1_HUMAN	LRSM1_HUMAN_0	493.498
NIBL1_HUMAN	NIBL1_HUMAN_0	690,691,695
ARC1B_HUMAN	ARC1B_HUMAN_0	309.31
RS14_HUMAN	RS14_HUMAN_0	106,113,136,138,139
RL1D1_HUMAN	RL1D1_HUMAN_0	412,414,422
SPAG1_HUMAN	SPAG1_HUMAN_0	346.353
PA2G4_HUMAN	PA2G4_HUMAN_0	359,360,362
PAR12_HUMAN	PAR12_HUMAN_0	257.262
S30BP_HUMAN	S30BP_HUMAN_0	17.21
S30BP_HUMAN	S30BP_HUMAN_1	76.78
CBX6_HUMAN	CBX6_HUMAN_0	142.15
PP1RB_HUMAN	PP1RB_HUMAN_0	57,63,72,73,74,76,107,108
GTR2_HUMAN	GTR2_HUMAN_0	490,502,504
CLK3_HUMAN	CLK3_HUMAN_0	154,156,172,173,174,196,198,214,223,225,279,280,282
F193A_HUMAN	F193A_HUMAN_0	289.292
PAPOA_HUMAN	PAPOA_HUMAN_0	22,23,26
TWF1_HUMAN	TWF1_HUMAN_0	141.142
CEP41_HUMAN	CEP41_HUMAN_0	95.98
PDX1_HUMAN	PDX1_HUMAN_0	60.65
CDAN1_HUMAN	CDAN1_HUMAN_0	70.74
K1671_HUMAN	K1671_HUMAN_0	1756.18
PRR12_HUMAN	PRR12_HUMAN_0	93,95,99
PRR12_HUMAN	PRR12_HUMAN_1	482.486
PRR12_HUMAN	PRR12_HUMAN_2	559.56
2A5A_HUMAN	2A5A_HUMAN_0	37,40,41,48
CSN3_HUMAN	CSN3_HUMAN_0	406,409,421,422
VGFR3_HUMAN	VGFR3_HUMAN_0	1332.13
MED12_HUMAN	MED12_HUMAN_0	697.699
MAP4_HUMAN	MAP4_HUMAN_0	353,357,366
MAP4_HUMAN	MAP4_HUMAN_1	685,686,695,786,788,803,805,824,826,867,873,875,924,927,936,940,941
MAP4_HUMAN	MAP4_HUMAN_2	1036.1
KI67_HUMAN	KI67_HUMAN_0	647.65
KI67_HUMAN	KI67_HUMAN_1	824.826
KI67_HUMAN	KI67_HUMAN_2	1130,1138,1141,1142,1166,1168,1175
KI67_HUMAN	KI67_HUMAN_3	1260.13
KI67_HUMAN	KI67_HUMAN_4	2112.21
KI67_HUMAN	KI67_HUMAN_5	2258,2260,2267
KI67_HUMAN	KI67_HUMAN_6	2836.28
KI67_HUMAN	KI67_HUMAN_7	1382,1385,1386,1392
RU2A_HUMAN	RU2A_HUMAN_0	177,179,235,238
BRSK2_HUMAN	BRSK2_HUMAN_0	421,422,425,426,430,434,438,442,462,465
BRSK2_HUMAN	BRSK2_HUMAN_1	508,511,512,519
BC11A_HUMAN	BC11A_HUMAN_0	204.207
BC11A_HUMAN	BC11A_HUMAN_1	327.331
BC11A_HUMAN	BC11A_HUMAN_2	624,626,629
EIF3J_HUMAN	EIF3J_HUMAN_0	10.12
PDZD2_HUMAN	PDZD2_HUMAN_0	943.947
MB12A_HUMAN	MB12A_HUMAN_0	162,169,191,194,201,203
NSMA2_HUMAN	NSMA2_HUMAN_0	202.208
CCD62_HUMAN	CCD62_HUMAN_0	82.87
NRCAM_HUMAN	NRCAM_HUMAN_0	1220,1224,1225,1250,1253
MISP_HUMAN	MISP_HUMAN_0	540,542,543
MISP_HUMAN	MISP_HUMAN_1	283.286
MISP_HUMAN	MISP_HUMAN_2	393.399
BIN1_HUMAN	BIN1_HUMAN_0	295,297,302,306,322,326,330,332,347
PTN21_HUMAN	PTN21_HUMAN_0	576,577,585,589
PTN21_HUMAN	PTN21_HUMAN_1	709.71
PTC1_HUMAN	PTC1_HUMAN_0	1194.12
OSB11_HUMAN	OSB11_HUMAN_0	12,14,26
OSB11_HUMAN	OSB11_HUMAN_1	171,173,176,177,180,183,188,193,204
LRRF2_HUMAN	LRRF2_HUMAN_0	299,308,316,319,322,323,327,330,331,332,347
DDHD2_HUMAN	DDHD2_HUMAN_0	582.592
PIAS1_HUMAN	PIAS1_HUMAN_0	465,466,467,482,484,486,487,496,502,505,509
ITA4_HUMAN	ITA4_HUMAN_0	1020,1022,1023
SYNJ1_HUMAN	SYNJ1_HUMAN_0	1047,1048,1052
SYNJ1_HUMAN	SYNJ1_HUMAN_1	1344.13
DACH1_HUMAN	DACH1_HUMAN_0	579,582,583
SPAS2_HUMAN	SPAS2_HUMAN_0	142.145
SPAS2_HUMAN	SPAS2_HUMAN_1	471,479,481
NU155_HUMAN	NU155_HUMAN_0	991.993
SHSA7_HUMAN	SHSA7_HUMAN_0	245.246
PSMD9_HUMAN	PSMD9_HUMAN_0	126.128
CCD61_HUMAN	CCD61_HUMAN_0	333,335,372,375
CD158_HUMAN	CD158_HUMAN_0	471.472
LZTS1_HUMAN	LZTS1_HUMAN_0	230.232
AT2B1_HUMAN	AT2B1_HUMAN_0	1166,1174,1176,1177,1192,1202,1214,1215,1219,1244,1245,1248,1252,1256
MLXIP_HUMAN	MLXIP_HUMAN_0	32.38
RD23B_HUMAN	RD23B_HUMAN_0	154,159,173
STAR_HUMAN	STAR_HUMAN_0	55.56
RHG21_HUMAN	RHG21_HUMAN_0	1094.11
RHG21_HUMAN	RHG21_HUMAN_1	251.253
RHG21_HUMAN	RHG21_HUMAN_2	855,860,865,877,879,922,923,924
RHG21_HUMAN	RHG21_HUMAN_3	1429,1430,1431,1512,1514,1633,1635,1667,1670,1673
RHG21_HUMAN	RHG21_HUMAN_4	1841,1858,1859
RHG21_HUMAN	RHG21_HUMAN_5	439.441
RHG21_HUMAN	RHG21_HUMAN_6	473,475,481
PAX7_HUMAN	PAX7_HUMAN_0	202.206
NIBAN_HUMAN	NIBAN_HUMAN_0	576,578,580,581,583,591,595,601
MSD4_HUMAN	MSD4_HUMAN_0	100.105
SSR3_HUMAN	SSR3_HUMAN_0	331,336,347
UCHL3_HUMAN	UCHL3_HUMAN_0	127.129
TXLNA_HUMAN	TXLNA_HUMAN_0	513.514
ZN516_HUMAN	ZN516_HUMAN_0	115,117,119
VAMP3_HUMAN	VAMP3_HUMAN_0	57.62
RGRF1_HUMAN	RGRF1_HUMAN_0	729,737,749,751,757
LFG3_HUMAN	LFG3_HUMAN_0	80.82
CSCL1_HUMAN	CSCL1_HUMAN_0	734.738
KCD15_HUMAN	KCD15_HUMAN_0	34.37
ZMYM2_HUMAN	ZMYM2_HUMAN_0	302,304,308
ZMYM2_HUMAN	ZMYM2_HUMAN_1	1055,1059,1060,1063
ZN362_HUMAN	ZN362_HUMAN_0	158,159,161,168
ZN362_HUMAN	ZN362_HUMAN_1	400,403,409
AGAP2_HUMAN	AGAP2_HUMAN_0	807.808
AGAP2_HUMAN	AGAP2_HUMAN_1	580,583,584,610,613,614,634,637,646,647,655
AGAP2_HUMAN	AGAP2_HUMAN_2	1176,1177,1180
FL2D_HUMAN	FL2D_HUMAN_0	287,289,297
H2B1K_HUMAN	H2B1K_HUMAN_0	112,115,122
H2B1K_HUMAN	H2B1K_HUMAN_1	36,37,38,40
GDIA_HUMAN	GDIA_HUMAN_0	37,42,44
AGO2_HUMAN	AGO2_HUMAN_0	384.386
AGO2_HUMAN	AGO2_HUMAN_1	823,827,830,833
STK26_HUMAN	STK26_HUMAN_0	299,303,305,308,326,327
PTPC1_HUMAN	PTPC1_HUMAN_0	543,546,552
PTPC1_HUMAN	PTPC1_HUMAN_1	391,392,393
BORG5_HUMAN	BORG5_HUMAN_0	73.76
BORG5_HUMAN	BORG5_HUMAN_1	141,146,153,189,191,194
BORG5_HUMAN	BORG5_HUMAN_2	349.352
PKP4_HUMAN	PKP4_HUMAN_0	444,446,457
PKP4_HUMAN	PKP4_HUMAN_1	1047,1048,1090,1093,1096,1097,1114,1115,1128
PKP4_HUMAN	PKP4_HUMAN_2	126,131,135
PKP4_HUMAN	PKP4_HUMAN_3	212,213,220,222,223,230,232,272,274,275,280,282,289,305,313,316,326,335,336,368,371,381,388,389,391,394,402,405
PKP4_HUMAN	PKP4_HUMAN_4	1134,1137,1138,1142
PKP4_HUMAN	PKP4_HUMAN_5	431,437,439
PKP4_HUMAN	PKP4_HUMAN_6	509,511,514
PKP4_HUMAN	PKP4_HUMAN_7	1177,1186,1189
KIF5A_HUMAN	KIF5A_HUMAN_0	805.806
TERA_HUMAN	TERA_HUMAN_0	701.704
TERA_HUMAN	TERA_HUMAN_1	745,747,754,764,769,774,786,795,804
TERA_HUMAN	TERA_HUMAN_2	281.283
TERA_HUMAN	TERA_HUMAN_3	2,6,12,13
MRC2_HUMAN	MRC2_HUMAN_0	1452,1455,1456
DLG4_HUMAN	DLG4_HUMAN_0	286,289,294
EVI2B_HUMAN	EVI2B_HUMAN_0	267,270,277
CLK2_HUMAN	CLK2_HUMAN_0	8,13,16,49,50,57,58,62,63
SHIP2_HUMAN	SHIP2_HUMAN_0	880,885,985,986,1130,1134
ZN608_HUMAN	ZN608_HUMAN_0	420.423
NSE4A_HUMAN	NSE4A_HUMAN_0	27,29,31,60,62
RL23A_HUMAN	RL23A_HUMAN_0	41,42,44
ASF1A_HUMAN	ASF1A_HUMAN_0	164.165
S38A3_HUMAN	S38A3_HUMAN_0	51.53
ZO1_HUMAN	ZO1_HUMAN_0	274,276,279,283,289,293,296,299,312,314,319,322,328,336,352,353
ZO1_HUMAN	ZO1_HUMAN_1	616.621
ZO1_HUMAN	ZO1_HUMAN_2	124,130,131,159,161,165,167,174,177,178
ZO1_HUMAN	ZO1_HUMAN_3	808,809,820,821,823,827,829,830,836
ZO1_HUMAN	ZO1_HUMAN_4	894,898,911,918
ZO1_HUMAN	ZO1_HUMAN_5	1060,1065,1070
ZO1_HUMAN	ZO1_HUMAN_6	1138,1139,1145
ZO1_HUMAN	ZO1_HUMAN_7	1616.16
LEO1_HUMAN	LEO1_HUMAN_0	9,13,65,71,74,76,80
LEO1_HUMAN	LEO1_HUMAN_1	150,153,161,170,178,187,196,204,211,219,228,237,245,253,260,270,272,276,278,293,295,299,301
LEO1_HUMAN	LEO1_HUMAN_2	605,606,607,609,613
NCAM1_HUMAN	NCAM1_HUMAN_0	779.783
CAD11_HUMAN	CAD11_HUMAN_0	787.79
JAK3_HUMAN	JAK3_HUMAN_0	7.16
NCHL1_HUMAN	NCHL1_HUMAN_0	1146.11
NOTC2_HUMAN	NOTC2_HUMAN_0	2069.21
NOTC2_HUMAN	NOTC2_HUMAN_1	1841.18
NOTC2_HUMAN	NOTC2_HUMAN_2	2080,2089,2092,2096
SMAL1_HUMAN	SMAL1_HUMAN_0	111,119,122,128
SMAL1_HUMAN	SMAL1_HUMAN_1	171,172,180,197,210,214
BAF_HUMAN	BAF_HUMAN_0	1,2,3
CPSF6_HUMAN	CPSF6_HUMAN_0	486,488,493,499,501,510,512,524
CPSF6_HUMAN	CPSF6_HUMAN_1	403.406
CD5_HUMAN	CD5_HUMAN_0	481,482,484,486
RBM7_HUMAN	RBM7_HUMAN_0	107,109,135,136
UBE2O_HUMAN	UBE2O_HUMAN_0	487,490,514,518
UBE2O_HUMAN	UBE2O_HUMAN_1	72,86,88,97,98,101,114
UBE2O_HUMAN	UBE2O_HUMAN_2	827,835,837,838,840
UBE2O_HUMAN	UBE2O_HUMAN_3	1195.12
AKAP2_HUMAN	AKAP2_HUMAN_0	145,151,153,154,156
AKAP2_HUMAN	AKAP2_HUMAN_1	26,29,30,43
AKAP2_HUMAN	AKAP2_HUMAN_2	629,630,717,719,745,747,777,779,780,784
AKAP2_HUMAN	AKAP2_HUMAN_3	464,466,472
SASH3_HUMAN	SASH3_HUMAN_0	317.319
SASH3_HUMAN	SASH3_HUMAN_1	6,9,20,24,25,26,33,36,37,41
SASH3_HUMAN	SASH3_HUMAN_2	141,146,148,188,192
CXCR4_HUMAN	CXCR4_HUMAN_0	318,320,323,324,337,338,340,345,346,347,351
ERCC5_HUMAN	ERCC5_HUMAN_0	340,354,355,356,381,383,561,562
ERCC5_HUMAN	ERCC5_HUMAN_1	155.156
MAGI1_HUMAN	MAGI1_HUMAN_0	1360,1364,1378,1394,1396
MAGI1_HUMAN	MAGI1_HUMAN_1	1485,1486,1489
PUR6_HUMAN	PUR6_HUMAN_0	229.237
BCL9L_HUMAN	BCL9L_HUMAN_0	20.24
BCL9L_HUMAN	BCL9L_HUMAN_1	115,117,120,128
BCL9L_HUMAN	BCL9L_HUMAN_2	914,917,925,933,935,941,945,946,948,953,956,974,986,988,990,996,1003,1009,1016
CLD18_HUMAN	CLD18_HUMAN_0	209,210,213,219,240,246,252,255,259
YPEL5_HUMAN	YPEL5_HUMAN_0	117.12
XPC_HUMAN	XPC_HUMAN_0	882.883
XPC_HUMAN	XPC_HUMAN_1	396.398
OGT1_HUMAN	OGT1_HUMAN_0	2.3
BTG2_HUMAN	BTG2_HUMAN_0	146.148
SALL1_HUMAN	SALL1_HUMAN_0	585,589,592
ECT2_HUMAN	ECT2_HUMAN_0	358,366,369,372,375,390,396
ECT2_HUMAN	ECT2_HUMAN_1	841,845,860,865,879,881,888,890
CXB1_HUMAN	CXB1_HUMAN_0	228,232,257,265,268
SP7_HUMAN	SP7_HUMAN_0	75.79
NASP_HUMAN	NASP_HUMAN_0	122.126
NASP_HUMAN	NASP_HUMAN_1	476,479,496,502
AT11C_HUMAN	AT11C_HUMAN_0	1107,1109,1111,1115,1123,1125,1128
RNH2A_HUMAN	RNH2A_HUMAN_0	296.297
HYCCI_HUMAN	HYCCI_HUMAN_0	318.32
RHG25_HUMAN	RHG25_HUMAN_0	392,394,396,400
RHG25_HUMAN	RHG25_HUMAN_1	506,510,519,532
AQP2_HUMAN	AQP2_HUMAN_0	255,260,263,268
RHG39_HUMAN	RHG39_HUMAN_0	383,386,387
RHG39_HUMAN	RHG39_HUMAN_1	444.447
UBAP1_HUMAN	UBAP1_HUMAN_0	252,264,266
RICTR_HUMAN	RICTR_HUMAN_0	1576,1590,1591
RICTR_HUMAN	RICTR_HUMAN_1	1132,1134,1137,1173,1174,1176
RICTR_HUMAN	RICTR_HUMAN_2	1283,1285,1291,1292,1294,1301
RICTR_HUMAN	RICTR_HUMAN_3	1369,1375,1384,1385,1387,1395,1413,1414,1416
STRN4_HUMAN	STRN4_HUMAN_0	200.205
TGFA1_HUMAN	TGFA1_HUMAN_0	851,852,854
NTF3_HUMAN	NTF3_HUMAN_0	98.1
FRK_HUMAN	FRK_HUMAN_0	495.496
MOB1B_HUMAN	MOB1B_HUMAN_0	1,6,11,22
CCNL2_HUMAN	CCNL2_HUMAN_0	329,337,347,350
REXO1_HUMAN	REXO1_HUMAN_0	286.288
REXO1_HUMAN	REXO1_HUMAN_1	912.913
ANR17_HUMAN	ANR17_HUMAN_0	205.208
ANR17_HUMAN	ANR17_HUMAN_1	2037,2040,2041,2043,2044,2046,2058,2064,2066
ANR17_HUMAN	ANR17_HUMAN_2	1692,1695,1698,1699,1708
MED26_HUMAN	MED26_HUMAN_0	372.375
SL9A2_HUMAN	SL9A2_HUMAN_0	660,661,668
NBAS_HUMAN	NBAS_HUMAN_0	472.474
RBBP6_HUMAN	RBBP6_HUMAN_0	681,683,687,711,713,723,725,729,747,749,767,769,771,779
RBBP6_HUMAN	RBBP6_HUMAN_1	872.875
RBBP6_HUMAN	RBBP6_HUMAN_2	1268,1270,1276
RBBP6_HUMAN	RBBP6_HUMAN_3	1548.15
RBBP6_HUMAN	RBBP6_HUMAN_4	1643,1645,1647,1650,1694,1696,1698,1702,1704
RBBP6_HUMAN	RBBP6_HUMAN_5	243,244,245,246
MYCT1_HUMAN	MYCT1_HUMAN_0	114,115,128,134,137,140,148,218,224
GORS2_HUMAN	GORS2_HUMAN_0	213,221,224,244,248,407,408,410,432,440,448
YTHD2_HUMAN	YTHD2_HUMAN_0	1,4,36,38
HBP1_HUMAN	HBP1_HUMAN_0	379.381
FERM2_HUMAN	FERM2_HUMAN_0	178,180,184
TGM1_HUMAN	TGM1_HUMAN_0	91,94,103
KS6B2_HUMAN	KS6B2_HUMAN_0	409,415,416,422
GMCL1_HUMAN	GMCL1_HUMAN_0	65.67
ARHGH_HUMAN	ARHGH_HUMAN_0	382,386,392,393,394,395
ARHGH_HUMAN	ARHGH_HUMAN_1	460.462
M3K9_HUMAN	M3K9_HUMAN_0	532,534,546,547,551,553
MAP1B_HUMAN	MAP1B_HUMAN_0	526,540,543
MAP1B_HUMAN	MAP1B_HUMAN_1	827,830,831,836
MAP1B_HUMAN	MAP1B_HUMAN_2	935,936,938,947,969,971,976,991,994
MAP1B_HUMAN	MAP1B_HUMAN_3	1143,1146,1151,1153,1155,1169,1170
MAP1B_HUMAN	MAP1B_HUMAN_4	1207,1210,1211
MAP1B_HUMAN	MAP1B_HUMAN_5	1246,1251,1255,1257,1259,1261,1264,1269,1275,1279,1281,1297,1301,1311,1316,1321,1323,1325,1327,1329,1333,1335,1336,1338,1340,1375,1377,1386,1388,1395,1399,1405,1407,1409,1414,1426,1442,1445,1448,1500,1502,1511,1516,1519,1524,1526
MAP1B_HUMAN	MAP1B_HUMAN_6	1617,1619,1624,1630,1632,1645,1652,1656,1665
MAP1B_HUMAN	MAP1B_HUMAN_7	1771,1778,1781,1784,1787,1791,1792,1795,1796,1800,1816,1817,1818,1829
MAP1B_HUMAN	MAP1B_HUMAN_8	1863,1869,1871,1880,1886,1888,1903,1904,1905,1914,1918,1921,1922,1931,1945,1946,1948,1954,1955,1956,1959,1962,1963,1969,1971,1972,1973,2030,2033,2036,2041,2050,2058,2071,2085,2094,2097
MAP1B_HUMAN	MAP1B_HUMAN_9	2208.22
MAP1B_HUMAN	MAP1B_HUMAN_10	335,338,342
GEPH_HUMAN	GEPH_HUMAN_0	187,193,197,198,199,264,265,267,269,275,276,279,280,282,285,290,294,302,304
DPYL1_HUMAN	DPYL1_HUMAN_0	508,513,517,520,521,523
DPYL1_HUMAN	DPYL1_HUMAN_1	568.569
H2AY_HUMAN	H2AY_HUMAN_0	169,172,173,174,177
ARFG3_HUMAN	ARFG3_HUMAN_0	454.456
ACM2_HUMAN	ACM2_HUMAN_0	231.233
MARK2_HUMAN	MARK2_HUMAN_0	90,91,92
MARK2_HUMAN	MARK2_HUMAN_1	39.42
MARK2_HUMAN	MARK2_HUMAN_2	379,389,397,399,408
MARK2_HUMAN	MARK2_HUMAN_3	465,466,478,482,485,492,497
MARK2_HUMAN	MARK2_HUMAN_4	568,570,592,594,595,612,618,620,623,630,632
NAB2_HUMAN	NAB2_HUMAN_0	146,156,158,161,170
NAB2_HUMAN	NAB2_HUMAN_1	5.7
T200B_HUMAN	T200B_HUMAN_0	197.201
SF01_HUMAN	SF01_HUMAN_0	79,81,86,88
AF10_HUMAN	AF10_HUMAN_0	683,685,688
AF10_HUMAN	AF10_HUMAN_1	431.435
MACOI_HUMAN	MACOI_HUMAN_0	633,636,647
MACOI_HUMAN	MACOI_HUMAN_1	304,305,330,331
IBTK_HUMAN	IBTK_HUMAN_0	989,992,995,1003,1044,1048
IBTK_HUMAN	IBTK_HUMAN_1	1197.12
IBTK_HUMAN	IBTK_HUMAN_2	1112.11
NUMB_HUMAN	NUMB_HUMAN_0	237,240,242,243,245,275,283,287,294
NUMB_HUMAN	NUMB_HUMAN_1	424,435,437,630,633
PHF10_HUMAN	PHF10_HUMAN_0	296,300,326,330
MYO9B_HUMAN	MYO9B_HUMAN_0	1330,1345,1347,1353,1355,1360,1404,1407
MYO9B_HUMAN	MYO9B_HUMAN_1	1042.1
MYO9B_HUMAN	MYO9B_HUMAN_2	1252,1257,1260,1270,1289,1293,1294
UVRAG_HUMAN	UVRAG_HUMAN_0	482,492,497,508,515,517,521,549,553
UVRAG_HUMAN	UVRAG_HUMAN_1	688.695
PI51B_HUMAN	PI51B_HUMAN_0	444.447
RABE2_HUMAN	RABE2_HUMAN_0	188,192,193,199,203
CSRP1_HUMAN	CSRP1_HUMAN_0	80.86
TOM34_HUMAN	TOM34_HUMAN_0	24.31
OSBL9_HUMAN	OSBL9_HUMAN_0	323,324,325,328,334
SP100_HUMAN	SP100_HUMAN_0	326.33
OSTF1_HUMAN	OSTF1_HUMAN_0	199,201,212
RTF1_HUMAN	RTF1_HUMAN_0	52,54,57,59
S1PR1_HUMAN	S1PR1_HUMAN_0	350,352,354,357
MKNK1_HUMAN	MKNK1_HUMAN_0	220.225
CP131_HUMAN	CP131_HUMAN_0	77.78
CP131_HUMAN	CP131_HUMAN_1	143.145
NAV3_HUMAN	NAV3_HUMAN_0	1185.12
NAV3_HUMAN	NAV3_HUMAN_1	1458.15
DAPK1_HUMAN	DAPK1_HUMAN_0	318,320,323,325,332,335
DPOA2_HUMAN	DPOA2_HUMAN_0	125,126,129,140,146,148,149,151,153,157
RANG_HUMAN	RANG_HUMAN_0	12,13,14,20
DUS4_HUMAN	DUS4_HUMAN_0	385.39
F199X_HUMAN	F199X_HUMAN_0	315.32
PTN11_HUMAN	PTN11_HUMAN_0	538,545,546,561,569,579,583,594
GBG5_HUMAN	GBG5_HUMAN_0	1,3,4,5
ERC6L_HUMAN	ERC6L_HUMAN_0	987,994,999,1003
CARD9_HUMAN	CARD9_HUMAN_0	424.43
CARD9_HUMAN	CARD9_HUMAN_1	530.532
PKHM1_HUMAN	PKHM1_HUMAN_0	431,433,434
NEK9_HUMAN	NEK9_HUMAN_0	792,794,800
NEK9_HUMAN	NEK9_HUMAN_1	1,12,15,19,27
NEK9_HUMAN	NEK9_HUMAN_2	330,331,332,334
SL9A1_HUMAN	SL9A1_HUMAN_0	598,601,602,604
SL9A1_HUMAN	SL9A1_HUMAN_1	692,694,696,702,707,717,722,725,728,765,769,770,773,778,782,784,786,787,795
CE152_HUMAN	CE152_HUMAN_0	1240.12
DNJA3_HUMAN	DNJA3_HUMAN_0	112.113
PLD1_HUMAN	PLD1_HUMAN_0	557.56
PALLD_HUMAN	PALLD_HUMAN_0	631,634,640,727,730,750,754,762,765
PALLD_HUMAN	PALLD_HUMAN_1	978.983
PALLD_HUMAN	PALLD_HUMAN_2	1100,1103,1105,1115,1117,1120
RETR2_HUMAN	RETR2_HUMAN_0	278,280,282,328,329,333,336,343,346
TPC12_HUMAN	TPC12_HUMAN_0	106,108,181,183
STAM2_HUMAN	STAM2_HUMAN_0	373.374
KLF5_HUMAN	KLF5_HUMAN_0	358.362
RBL2_HUMAN	RBL2_HUMAN_0	947,951,961,965,970,981,985,994
RBL2_HUMAN	RBL2_HUMAN_1	1041.1
RBL2_HUMAN	RBL2_HUMAN_2	638,641,658,660,661,669,671
TGIF1_HUMAN	TGIF1_HUMAN_0	285.29
BCL2_HUMAN	BCL2_HUMAN_0	68.69
P85A_HUMAN	P85A_HUMAN_0	451,462,466,469
P85A_HUMAN	P85A_HUMAN_1	606.607
PCP2_HUMAN	PCP2_HUMAN_0	107.113
PLEK_HUMAN	PLEK_HUMAN_0	112,113,116
PLCB3_HUMAN	PLCB3_HUMAN_0	1104.11
AN13D_HUMAN	AN13D_HUMAN_0	464.468
WDR11_HUMAN	WDR11_HUMAN_0	203,204,207,208,218
MDHC_HUMAN	MDHC_HUMAN_0	331.332
MDHC_HUMAN	MDHC_HUMAN_1	240.241
NBEL2_HUMAN	NBEL2_HUMAN_0	2738,2741,2742
NBEL2_HUMAN	NBEL2_HUMAN_1	1866.19
KDM4B_HUMAN	KDM4B_HUMAN_0	621,631,632
TMM47_HUMAN	TMM47_HUMAN_0	2.5
PDE11_HUMAN	PDE11_HUMAN_0	161.162
FA13A_HUMAN	FA13A_HUMAN_0	590.596
FA13A_HUMAN	FA13A_HUMAN_1	649,651,726,731,740
FOXC1_HUMAN	FOXC1_HUMAN_0	227,231,234,240,247
PLXA4_HUMAN	PLXA4_HUMAN_0	1629.16
ARMX3_HUMAN	ARMX3_HUMAN_0	60,66,71,109,112,118
NU133_HUMAN	NU133_HUMAN_0	26,27,40,44,49,56,58,59,62,71,73
SDA1_HUMAN	SDA1_HUMAN_0	231,233,235
MS18A_HUMAN	MS18A_HUMAN_0	27.35
ADAS_HUMAN	ADAS_HUMAN_0	64.73
AATF_HUMAN	AATF_HUMAN_0	315,319,320
NDF1_HUMAN	NDF1_HUMAN_0	258,265,273
KC1G3_HUMAN	KC1G3_HUMAN_0	30.31
ITSN2_HUMAN	ITSN2_HUMAN_0	881,883,886,888
ASPP2_HUMAN	ASPP2_HUMAN_0	697.699
ANC2_HUMAN	ANC2_HUMAN_0	469.473
ANC2_HUMAN	ANC2_HUMAN_1	731.735
ANO1_HUMAN	ANO1_HUMAN_0	6,7,8
SO1B3_HUMAN	SO1B3_HUMAN_0	292.294
RRP15_HUMAN	RRP15_HUMAN_0	10.18
MSX2_HUMAN	MSX2_HUMAN_0	121,122,129,134,140
BEND3_HUMAN	BEND3_HUMAN_0	131.134
RGPA1_HUMAN	RGPA1_HUMAN_0	710,720,733,735,739
RGPA1_HUMAN	RGPA1_HUMAN_1	772,774,777,795,796,797,798,859,860,863,999,1001,1003
RGPA1_HUMAN	RGPA1_HUMAN_2	378,381,384
HMGA1_HUMAN	HMGA1_HUMAN_0	1,5,8,35,38,43,48,52,63,75,77,98,101,102
VIR_HUMAN	VIR_HUMAN_0	132.137
VIR_HUMAN	VIR_HUMAN_1	1560,1574,1577,1578,1582
S2546_HUMAN	S2546_HUMAN_0	43.44
S2546_HUMAN	S2546_HUMAN_1	31,34,36
RND3_HUMAN	RND3_HUMAN_0	217.221
ARI1A_HUMAN	ARI1A_HUMAN_0	1181.12
ARI1A_HUMAN	ARI1A_HUMAN_1	1599,1601,1603
ARI1A_HUMAN	ARI1A_HUMAN_2	362.365
ARI1A_HUMAN	ARI1A_HUMAN_3	695,697,701
ARI1A_HUMAN	ARI1A_HUMAN_4	763,768,771
ARI1A_HUMAN	ARI1A_HUMAN_5	1887.19
NFAT5_HUMAN	NFAT5_HUMAN_0	134,139,142,144,154,157
RFIP1_HUMAN	RFIP1_HUMAN_0	338,340,342,344,355,356,357,364
RFIP1_HUMAN	RFIP1_HUMAN_1	183,189,196,198,201,231,233
RGL1_HUMAN	RGL1_HUMAN_0	519.525
ERR1_HUMAN	ERR1_HUMAN_0	18,21,25,26,30
NFIA_HUMAN	NFIA_HUMAN_0	257,264,270,271,279,286,299,302,304,306,318,321,332,334
MPRI_HUMAN	MPRI_HUMAN_0	2345.23
MPRI_HUMAN	MPRI_HUMAN_1	2399,2400,2408,2414,2478,2483
RAD_HUMAN	RAD_HUMAN_0	272,289,298,300
RAD_HUMAN	RAD_HUMAN_1	25,26,38
ELOV5_HUMAN	ELOV5_HUMAN_0	272,280,282
NDUB4_HUMAN	NDUB4_HUMAN_0	22.25
RFFL_HUMAN	RFFL_HUMAN_0	225,228,231,239,241,244
RFFL_HUMAN	RFFL_HUMAN_1	28.33
M3K3_HUMAN	M3K3_HUMAN_0	130,144,146,154,165,167,174,175
M3K3_HUMAN	M3K3_HUMAN_1	311,316,336,339,354,356
ATAT_HUMAN	ATAT_HUMAN_0	269,271,275
CATD_HUMAN	CATD_HUMAN_0	249.251
UBX2B_HUMAN	UBX2B_HUMAN_0	58.65
UBX2B_HUMAN	UBX2B_HUMAN_1	215,230,233,234
P3C2A_HUMAN	P3C2A_HUMAN_0	328.337
WNK2_HUMAN	WNK2_HUMAN_0	1797,1804,1816,1817
WNK2_HUMAN	WNK2_HUMAN_1	1888.19
SH2B2_HUMAN	SH2B2_HUMAN_0	116.117
GRM1B_HUMAN	GRM1B_HUMAN_0	20,27,29
GRM1B_HUMAN	GRM1B_HUMAN_1	580,583,584,586
DOK3_HUMAN	DOK3_HUMAN_0	329.332
DOK3_HUMAN	DOK3_HUMAN_1	377.38
ODPX_HUMAN	ODPX_HUMAN_0	153.161
ADCY9_HUMAN	ADCY9_HUMAN_0	353.356
ADCY9_HUMAN	ADCY9_HUMAN_1	607.609
ADCY9_HUMAN	ADCY9_HUMAN_2	687.69
K1328_HUMAN	K1328_HUMAN_0	20.25
K1328_HUMAN	K1328_HUMAN_1	64.67
ANM3_HUMAN	ANM3_HUMAN_0	24.26
PPM1J_HUMAN	PPM1J_HUMAN_0	200.203
ACPH_HUMAN	ACPH_HUMAN_0	184.186
SETX_HUMAN	SETX_HUMAN_0	1016.1
UBP21_HUMAN	UBP21_HUMAN_0	110,112,114
SFR19_HUMAN	SFR19_HUMAN_0	237.238
SFR19_HUMAN	SFR19_HUMAN_1	497.499
SFR19_HUMAN	SFR19_HUMAN_2	611,613,718,724,731,733,737,753,759,871,873
SFR19_HUMAN	SFR19_HUMAN_3	962,964,975,988,991,993,997,1000,1004
YIPF5_HUMAN	YIPF5_HUMAN_0	25,27,38,43
HSP7C_HUMAN	HSP7C_HUMAN_0	106.11
HSP7C_HUMAN	HSP7C_HUMAN_1	540.543
LRP1_HUMAN	LRP1_HUMAN_0	4519.45
LRP1_HUMAN	LRP1_HUMAN_1	2558,2559,2562
MA7D2_HUMAN	MA7D2_HUMAN_0	186,187,194
MA7D2_HUMAN	MA7D2_HUMAN_1	288.289
SYT2_HUMAN	SYT2_HUMAN_0	121.124
EIF3E_HUMAN	EIF3E_HUMAN_0	438,441,444
PR38A_HUMAN	PR38A_HUMAN_0	181,192,193
PR38A_HUMAN	PR38A_HUMAN_1	249,251,259,261,276,278,280,291,293,295
TAF9_HUMAN	TAF9_HUMAN_0	148,151,154,157,158,160,163,168,177
MITF_HUMAN	MITF_HUMAN_0	490,503,507,515
PKD2_HUMAN	PKD2_HUMAN_0	73.75
PKD2_HUMAN	PKD2_HUMAN_1	943.948
PKD2_HUMAN	PKD2_HUMAN_2	800,807,811
ERBIN_HUMAN	ERBIN_HUMAN_0	1178.12
ERBIN_HUMAN	ERBIN_HUMAN_1	439,443,482,484,597,601,602
ERBIN_HUMAN	ERBIN_HUMAN_2	843,849,851,852,856,871,873
K0930_HUMAN	K0930_HUMAN_0	261,265,266,270,275,278,286,288,289,292,303,305
K0930_HUMAN	K0930_HUMAN_1	350.352
GPSM3_HUMAN	GPSM3_HUMAN_0	34,38,53,55,58,82,85,107,109
CYTSA_HUMAN	CYTSA_HUMAN_0	383,384,388,391
CYTSA_HUMAN	CYTSA_HUMAN_1	827,830,831,832,833,834,867,869,873,880,886
BSN_HUMAN	BSN_HUMAN_0	2583.26
BSN_HUMAN	BSN_HUMAN_1	1039.1
BSN_HUMAN	BSN_HUMAN_2	2795,2798,2801
BSN_HUMAN	BSN_HUMAN_3	3290,3294,3295
BSN_HUMAN	BSN_HUMAN_4	247.251
WBP11_HUMAN	WBP11_HUMAN_0	235.236
WBP11_HUMAN	WBP11_HUMAN_1	352,360,363
BORC5_HUMAN	BORC5_HUMAN_0	70,74,76
FBRL_HUMAN	FBRL_HUMAN_0	123.125
RIN1_HUMAN	RIN1_HUMAN_0	348.35
SENP6_HUMAN	SENP6_HUMAN_0	5.8
SENP6_HUMAN	SENP6_HUMAN_1	334.335
DESP_HUMAN	DESP_HUMAN_0	1,6,21,27,31,36,37,42,52,55,58
DESP_HUMAN	DESP_HUMAN_1	2597,2602,2605,2606,2607,2609
DESP_HUMAN	DESP_HUMAN_2	164.165
DESP_HUMAN	DESP_HUMAN_3	2809,2814,2816,2819,2820,2824,2828
SYNP2_HUMAN	SYNP2_HUMAN_0	360.362
SYNP2_HUMAN	SYNP2_HUMAN_1	603,609,610,621,625
SYNP2_HUMAN	SYNP2_HUMAN_2	769,776,780
SYNP2_HUMAN	SYNP2_HUMAN_3	901,903,905,909
TLK1_HUMAN	TLK1_HUMAN_0	67,73,77,79,81,157,158
GEM_HUMAN	GEM_HUMAN_0	286.288
ESF1_HUMAN	ESF1_HUMAN_0	656.662
ESF1_HUMAN	ESF1_HUMAN_1	74,76,78,81,89
ESF1_HUMAN	ESF1_HUMAN_2	310,311,312
MCLN1_HUMAN	MCLN1_HUMAN_0	546,556,558
AT2A1_HUMAN	AT2A1_HUMAN_0	483.487
SELPL_HUMAN	SELPL_HUMAN_0	405.408
CNOT3_HUMAN	CNOT3_HUMAN_0	291,293,298
YTDC2_HUMAN	YTDC2_HUMAN_0	1077,1088,1089,1091
YTDC2_HUMAN	YTDC2_HUMAN_1	1211,1220,1222,1262,1266,1268,1278,1280
RBPMS_HUMAN	RBPMS_HUMAN_0	11.13
RBPMS_HUMAN	RBPMS_HUMAN_1	112,116,117
ANR11_HUMAN	ANR11_HUMAN_0	407,409,410
ANR11_HUMAN	ANR11_HUMAN_1	1119.11
ANR11_HUMAN	ANR11_HUMAN_2	1846,1849,1851,1858
GRL1A_HUMAN	GRL1A_HUMAN_0	363.364
SAC2_HUMAN	SAC2_HUMAN_0	826.829
SAC2_HUMAN	SAC2_HUMAN_1	904,906,934,939,941
CBPD_HUMAN	CBPD_HUMAN_0	1343,1357,1360,1367,1369,1373
ZMIZ2_HUMAN	ZMIZ2_HUMAN_0	387.394
ZMIZ2_HUMAN	ZMIZ2_HUMAN_1	504.505
OSBP1_HUMAN	OSBP1_HUMAN_0	189,192,197,237,239
OSBP1_HUMAN	OSBP1_HUMAN_1	337,344,350,376,378,381,384,385,388
MTG8_HUMAN	MTG8_HUMAN_0	591.594
MTG8_HUMAN	MTG8_HUMAN_1	40.46
SNX2_HUMAN	SNX2_HUMAN_0	93,96,100,103,105,116,118
SNX2_HUMAN	SNX2_HUMAN_1	225,226,228
LC7L3_HUMAN	LC7L3_HUMAN_0	332,334,419,424,428,430
JPH1_HUMAN	JPH1_HUMAN_0	447,451,460,464,468,474,478
JPH1_HUMAN	JPH1_HUMAN_1	215.219
JPH1_HUMAN	JPH1_HUMAN_2	160,161,164
ADDB_HUMAN	ADDB_HUMAN_0	59.61
ADDB_HUMAN	ADDB_HUMAN_1	527,529,531,532,534,591,595,599,603,612,616,618
ADDB_HUMAN	ADDB_HUMAN_2	692,696,698,700,702,710,712,725
TTC12_HUMAN	TTC12_HUMAN_0	66.7
KAP0_HUMAN	KAP0_HUMAN_0	74,76,82
PPIA_HUMAN	PPIA_HUMAN_0	76.78
ZBT7A_HUMAN	ZBT7A_HUMAN_0	336.34
NUCL_HUMAN	NUCL_HUMAN_0	457,461,493,497
NUCL_HUMAN	NUCL_HUMAN_1	27,33,40,66,75,83,91,98,105
NUCL_HUMAN	NUCL_HUMAN_2	300,303,304
LAP2A_HUMAN	LAP2A_HUMAN_0	65,66,73,153,155,159,163,167
LAP2A_HUMAN	LAP2A_HUMAN_1	305,309,311
RB40C_HUMAN	RB40C_HUMAN_0	261.267
ATLA1_HUMAN	ATLA1_HUMAN_0	9,14,21,22
ANPRB_HUMAN	ANPRB_HUMAN_0	512,515,517,522,525
SMAD5_HUMAN	SMAD5_HUMAN_0	462.464
DNMT1_HUMAN	DNMT1_HUMAN_0	140,142,151,153,188,191
KCAB2_HUMAN	KCAB2_HUMAN_0	6,8,13,17,19,24,26,30
RL29_HUMAN	RL29_HUMAN_0	28.3
SNAG_HUMAN	SNAG_HUMAN_0	283,286,306,307
RIMS2_HUMAN	RIMS2_HUMAN_0	1395.14
RIMS2_HUMAN	RIMS2_HUMAN_1	1127.11
C2CD5_HUMAN	C2CD5_HUMAN_0	600.605
C2CD5_HUMAN	C2CD5_HUMAN_1	656,658,660,661,665
C2CD5_HUMAN	C2CD5_HUMAN_2	259,261,279,283,284,291,292,294,300,303,304,305,313,320,322
KSYK_HUMAN	KSYK_HUMAN_0	294,295,296,315,318,322,347,351,363
SIAS_HUMAN	SIAS_HUMAN_0	70,71,80
SIAS_HUMAN	SIAS_HUMAN_1	274.276
PA24A_HUMAN	PA24A_HUMAN_0	430,433,434,436,446,455
PA24A_HUMAN	PA24A_HUMAN_1	511.514
PA24A_HUMAN	PA24A_HUMAN_2	723,726,728,730
RAB28_HUMAN	RAB28_HUMAN_0	1.3
ARI4A_HUMAN	ARI4A_HUMAN_0	1139.11
ARI4A_HUMAN	ARI4A_HUMAN_1	146,150,158,159
ARI4A_HUMAN	ARI4A_HUMAN_2	537.541
PYRG1_HUMAN	PYRG1_HUMAN_0	561,565,566,567,570,572,573,574,577,580
STXB1_HUMAN	STXB1_HUMAN_0	506.508
STXB1_HUMAN	STXB1_HUMAN_1	472.478
STXB1_HUMAN	STXB1_HUMAN_2	592.593
STXB1_HUMAN	STXB1_HUMAN_3	305.312
HNRL2_HUMAN	HNRL2_HUMAN_0	160,164,167,184,187,192,223,225,227
ADRM1_HUMAN	ADRM1_HUMAN_0	1,2,3
ADRM1_HUMAN	ADRM1_HUMAN_1	210,212,216
ETV3_HUMAN	ETV3_HUMAN_0	244,249,263
ETV3_HUMAN	ETV3_HUMAN_1	156.158
SUMO3_HUMAN	SUMO3_HUMAN_0	1.11
KMT2E_HUMAN	KMT2E_HUMAN_0	836,842,844,853
KMT2E_HUMAN	KMT2E_HUMAN_1	652,654,656
ASPH_HUMAN	ASPH_HUMAN_0	14.22
ENAM_HUMAN	ENAM_HUMAN_0	905.91
PTEN_HUMAN	PTEN_HUMAN_0	365,369,379,381,382,384
CWC15_HUMAN	CWC15_HUMAN_0	45.46
CWC15_HUMAN	CWC15_HUMAN_1	120.125
PDPK1_HUMAN	PDPK1_HUMAN_0	372.375
ISCU_HUMAN	ISCU_HUMAN_0	13,19,28,42
FAK2_HUMAN	FAK2_HUMAN_0	745,746,755,757,764
FAK2_HUMAN	FAK2_HUMAN_1	833,838,841,848
RAGP1_HUMAN	RAGP1_HUMAN_0	408,418,426,427,434,435,441
PML_HUMAN	PML_HUMAN_0	479,492,503,504,517
PML_HUMAN	PML_HUMAN_1	35.37
KCNH2_HUMAN	KCNH2_HUMAN_0	282.283
NPDC1_HUMAN	NPDC1_HUMAN_0	228,235,248,250
DPOD3_HUMAN	DPOD3_HUMAN_0	406,408,410,412
LPIN1_HUMAN	LPIN1_HUMAN_0	886.888
LPIN1_HUMAN	LPIN1_HUMAN_1	186,187,248,251,253
LPIN1_HUMAN	LPIN1_HUMAN_2	433,437,448
CTNA2_HUMAN	CTNA2_HUMAN_0	938.944
CTNA2_HUMAN	CTNA2_HUMAN_1	639,650,652,653,656
3BP2_HUMAN	3BP2_HUMAN_0	443.447
FEZ2_HUMAN	FEZ2_HUMAN_0	194,204,207
KPCD1_HUMAN	KPCD1_HUMAN_0	394,396,399,400
KPCD1_HUMAN	KPCD1_HUMAN_1	204.207
KPCD1_HUMAN	KPCD1_HUMAN_2	246.248
NR2F6_HUMAN	NR2F6_HUMAN_0	33.39
CRTC3_HUMAN	CRTC3_HUMAN_0	326,328,331,367,369,372,390,395,409
CRTC3_HUMAN	CRTC3_HUMAN_1	55,57,61
SNAI1_HUMAN	SNAI1_HUMAN_0	95,99,106,110,114,118
MIER3_HUMAN	MIER3_HUMAN_0	51.52
MIER3_HUMAN	MIER3_HUMAN_1	155,162,164,167
MCM4_HUMAN	MCM4_HUMAN_0	1,2,5,6,8,18,25,31
MCM4_HUMAN	MCM4_HUMAN_1	104,109,119,130
NCK2_HUMAN	NCK2_HUMAN_0	89,91,93,94,98,103
TBB4A_HUMAN	TBB4A_HUMAN_0	35.39
NMD3_HUMAN	NMD3_HUMAN_0	467.469
RABL6_HUMAN	RABL6_HUMAN_0	424,426,467,469,470
RABL6_HUMAN	RABL6_HUMAN_1	551,552,554,576,579,595,598,639,640
MCRI1_HUMAN	MCRI1_HUMAN_0	16,17,20,24,25,29
SHC3_HUMAN	SHC3_HUMAN_0	340.341
SHC3_HUMAN	SHC3_HUMAN_1	473.478
MARE3_HUMAN	MARE3_HUMAN_0	160,161,163,175
GLIS2_HUMAN	GLIS2_HUMAN_0	50.53
CADM1_HUMAN	CADM1_HUMAN_0	433.439
SF3A3_HUMAN	SF3A3_HUMAN_0	291.294
SF3A3_HUMAN	SF3A3_HUMAN_1	364,366,368
SF3A3_HUMAN	SF3A3_HUMAN_2	474.478
AKT3_HUMAN	AKT3_HUMAN_0	471,472,473,475
STT3B_HUMAN	STT3B_HUMAN_0	12,13,17,20,28
STT3B_HUMAN	STT3B_HUMAN_1	497.498
WASF1_HUMAN	WASF1_HUMAN_0	545.549
INAR1_HUMAN	INAR1_HUMAN_0	531.534
SORT_HUMAN	SORT_HUMAN_0	818.824
CSDC2_HUMAN	CSDC2_HUMAN_0	15.18
PPR18_HUMAN	PPR18_HUMAN_0	194,198,208,212,220,223
ZFY27_HUMAN	ZFY27_HUMAN_0	384,385,389
OLIG2_HUMAN	OLIG2_HUMAN_0	9,12,13
CCAR2_HUMAN	CCAR2_HUMAN_0	625,626,670,674,677,680,685,686
ZAP70_HUMAN	ZAP70_HUMAN_0	314.318
BMP2K_HUMAN	BMP2K_HUMAN_0	739.741
BMP2K_HUMAN	BMP2K_HUMAN_1	946.948
BMP2K_HUMAN	BMP2K_HUMAN_2	1028,1030,1031,1036,1040,1106,1110
K0355_HUMAN	K0355_HUMAN_0	664.672
MED14_HUMAN	MED14_HUMAN_0	1111,1118,1127,1135,1141,1143
MYH4_HUMAN	MYH4_HUMAN_0	1463,1466,1479,1481,1482,1513,1516
MYH4_HUMAN	MYH4_HUMAN_1	1599,1602,1603
MYH4_HUMAN	MYH4_HUMAN_2	1724,1725,1729,1738
MYH4_HUMAN	MYH4_HUMAN_3	1854.19
MYH4_HUMAN	MYH4_HUMAN_4	63.68
MYH4_HUMAN	MYH4_HUMAN_5	1131,1140,1143,1160,1161
MYH4_HUMAN	MYH4_HUMAN_6	1260,1264,1277,1285,1287,1291,1302,1305,1312
MYH4_HUMAN	MYH4_HUMAN_7	1365,1369,1376,1378,1380,1386
EMSY_HUMAN	EMSY_HUMAN_0	194,206,208,209,212
PRR11_HUMAN	PRR11_HUMAN_0	352.354
CAV1_HUMAN	CAV1_HUMAN_0	1.5
DYST_HUMAN	DYST_HUMAN_0	7489,7493,7509,7512
DYST_HUMAN	DYST_HUMAN_1	3967.4
DYST_HUMAN	DYST_HUMAN_2	235.236
DYST_HUMAN	DYST_HUMAN_3	1377.14
TPC1_HUMAN	TPC1_HUMAN_0	811,813,815
SWAHC_HUMAN	SWAHC_HUMAN_0	211.212
PKN2_HUMAN	PKN2_HUMAN_0	581.582
PKN2_HUMAN	PKN2_HUMAN_1	359.366
BAIP2_HUMAN	BAIP2_HUMAN_0	439,445,451,452,453,454,490,491
BAIP2_HUMAN	BAIP2_HUMAN_1	258,260,262,322,324,333,335,336,337,339,347,351,352,359,363,364,365
KCC2D_HUMAN	KCC2D_HUMAN_0	310,314,318,329,330,332,333,335,336
PACN2_HUMAN	PACN2_HUMAN_0	310,312,369,374,385,387,395,398,402
KDM2B_HUMAN	KDM2B_HUMAN_0	913,915,974,978
KDM2B_HUMAN	KDM2B_HUMAN_1	1028.1
CS047_HUMAN	CS047_HUMAN_0	150.154
MARCS_HUMAN	MARCS_HUMAN_0	25,26,28
MARCS_HUMAN	MARCS_HUMAN_1	76.8
MARCS_HUMAN	MARCS_HUMAN_2	127,130,131,132,133,134,144,146,149,158,162,166,169
RAI3_HUMAN	RAI3_HUMAN_0	335,344,346,349,356
NRBP2_HUMAN	NRBP2_HUMAN_0	408.41
RBM8A_HUMAN	RBM8A_HUMAN_0	41,45,53,55
RBM8A_HUMAN	RBM8A_HUMAN_1	165.167
GOGA3_HUMAN	GOGA3_HUMAN_0	384,388,392
GOGA3_HUMAN	GOGA3_HUMAN_1	1391.14
KPCD3_HUMAN	KPCD3_HUMAN_0	388,390,394
KPCD3_HUMAN	KPCD3_HUMAN_1	212.215
KPCD3_HUMAN	KPCD3_HUMAN_2	1,5,12,26,29,30,40,43,45
KI16B_HUMAN	KI16B_HUMAN_0	33.35
KI16B_HUMAN	KI16B_HUMAN_1	565,572,574,579,581
KI16B_HUMAN	KI16B_HUMAN_2	397.399
SMG7_HUMAN	SMG7_HUMAN_0	780.785
ILK_HUMAN	ILK_HUMAN_0	171,172,180
LMO7_HUMAN	LMO7_HUMAN_0	703,705,708,750,752,753
LMO7_HUMAN	LMO7_HUMAN_1	1009,1017,1019,1025,1031,1033,1047
LMO7_HUMAN	LMO7_HUMAN_2	245,248,251,256,295,299
LMO7_HUMAN	LMO7_HUMAN_3	341.344
LMO7_HUMAN	LMO7_HUMAN_4	1420,1422,1423,1424,1484,1490,1492,1509,1515,1520
LMO7_HUMAN	LMO7_HUMAN_5	1582,1583,1585,1587,1590,1592,1594,1596
EMC4_HUMAN	EMC4_HUMAN_0	35.4
COHA1_HUMAN	COHA1_HUMAN_0	147.149
SARNP_HUMAN	SARNP_HUMAN_0	162.167
ARP10_HUMAN	ARP10_HUMAN_0	413.414
CPEB3_HUMAN	CPEB3_HUMAN_0	191,194,283,289
CPEB3_HUMAN	CPEB3_HUMAN_1	421,424,425
RASF8_HUMAN	RASF8_HUMAN_0	128.13
3BP5_HUMAN	3BP5_HUMAN_0	374.375
SMG9_HUMAN	SMG9_HUMAN_0	1,3,6
SMG9_HUMAN	SMG9_HUMAN_1	113,116,117,121
ZC3HD_HUMAN	ZC3HD_HUMAN_0	63,76,81,108,109,133,136,197,206,208,210,217
ZC3HD_HUMAN	ZC3HD_HUMAN_1	262,264,315,317,324,327,328,335,345,347,353,355,357,358,363,369,371,373,375,379,380,386,392
ZC3HD_HUMAN	ZC3HD_HUMAN_2	641,642,830,832,836,844,847,850,852,874,876,878
ZC3HD_HUMAN	ZC3HD_HUMAN_3	1009,1013,1016
ZC3HD_HUMAN	ZC3HD_HUMAN_4	1064.11
ZC3HD_HUMAN	ZC3HD_HUMAN_5	1207,1209,1212,1216
ZC3HD_HUMAN	ZC3HD_HUMAN_6	1273,1278,1291,1294
ZC3HD_HUMAN	ZC3HD_HUMAN_7	1451,1454,1464
SSRG_HUMAN	SSRG_HUMAN_0	6.1
SSRG_HUMAN	SSRG_HUMAN_1	104.112
LSMD1_HUMAN	LSMD1_HUMAN_0	17,21,24,28
DUS1_HUMAN	DUS1_HUMAN_0	358.363
SYGP1_HUMAN	SYGP1_HUMAN_0	839.841
ACAP3_HUMAN	ACAP3_HUMAN_0	382.387
UBP34_HUMAN	UBP34_HUMAN_0	485,486,489
UBP34_HUMAN	UBP34_HUMAN_1	3349,3357,3358,3363,3380,3383,3384,3385,3405,3409
UBP34_HUMAN	UBP34_HUMAN_2	1460,1468,1471
SOS1_HUMAN	SOS1_HUMAN_0	1063,1077,1081,1133,1136,1160,1166,1177,1192,1196
SOS1_HUMAN	SOS1_HUMAN_1	1251,1256,1262,1264,1274,1278
CAF1B_HUMAN	CAF1B_HUMAN_0	427,428,431,432
CUL4B_HUMAN	CUL4B_HUMAN_0	45,46,47,48,51,52,61
CUL4B_HUMAN	CUL4B_HUMAN_1	139,141,142,143,145,147
WDR7_HUMAN	WDR7_HUMAN_0	925.934
WDR7_HUMAN	WDR7_HUMAN_1	1151.12
PPR35_HUMAN	PPR35_HUMAN_0	46.51
MYH8_HUMAN	MYH8_HUMAN_0	1723,1724,1853,1854
MYH8_HUMAN	MYH8_HUMAN_1	1368,1375,1377,1379
SPAT6_HUMAN	SPAT6_HUMAN_0	216.218
SPAT6_HUMAN	SPAT6_HUMAN_1	483.486
CLUS_HUMAN	CLUS_HUMAN_0	392,393,395
RAVR1_HUMAN	RAVR1_HUMAN_0	5.13
ING5_HUMAN	ING5_HUMAN_0	146.147
ATP7A_HUMAN	ATP7A_HUMAN_0	1431,1434,1446,1459,1462,1465,1468,1472,1475,1485
ATP7A_HUMAN	ATP7A_HUMAN_1	265,269,271
ATP7A_HUMAN	ATP7A_HUMAN_2	345,348,352,353,356,358,360,361
RBG1L_HUMAN	RBG1L_HUMAN_0	470,479,489,497
BZW2_HUMAN	BZW2_HUMAN_0	411.413
SNAPN_HUMAN	SNAPN_HUMAN_0	116,125,132
SNAPN_HUMAN	SNAPN_HUMAN_1	9.13
UBS3B_HUMAN	UBS3B_HUMAN_0	18,19,22
SPAST_HUMAN	SPAST_HUMAN_0	206.208
SPAST_HUMAN	SPAST_HUMAN_1	302.304
MPIP2_HUMAN	MPIP2_HUMAN_0	320,322,352,354
OTUD4_HUMAN	OTUD4_HUMAN_0	904.906
OTUD4_HUMAN	OTUD4_HUMAN_1	1005,1010,1022,1023
OTUD4_HUMAN	OTUD4_HUMAN_2	438.442
HDGF_HUMAN	HDGF_HUMAN_0	101,102,106,131,132
HDGF_HUMAN	HDGF_HUMAN_1	198,199,201,205
AP1AR_HUMAN	AP1AR_HUMAN_0	164,173,174,225,227
API5_HUMAN	API5_HUMAN_0	456,460,461,463
MINK1_HUMAN	MINK1_HUMAN_0	323.325
MINK1_HUMAN	MINK1_HUMAN_1	640.643
MINK1_HUMAN	MINK1_HUMAN_2	698,700,705,731,732,739,753,762,777,781
MINK1_HUMAN	MINK1_HUMAN_3	915.917
PDS5B_HUMAN	PDS5B_HUMAN_0	1153,1159,1160,1161,1164,1165,1175,1176,1181,1186,1187,1189,1190
PDS5B_HUMAN	PDS5B_HUMAN_1	1245,1254,1256,1258
PDS5B_HUMAN	PDS5B_HUMAN_2	1357,1360,1361,1365,1366,1368,1369,1380,1382,1406,1415,1416
CLIC1_HUMAN	CLIC1_HUMAN_0	145.155
DLGP1_HUMAN	DLGP1_HUMAN_0	355,358,374,382,396,405,411,414,418,421
DLGP1_HUMAN	DLGP1_HUMAN_1	588,591,594
OXSR1_HUMAN	OXSR1_HUMAN_0	323,324,330,338,354,358
SRCH_HUMAN	SRCH_HUMAN_0	138,144,156,158,169,170,205,206
SRCH_HUMAN	SRCH_HUMAN_1	310.311
HDAC9_HUMAN	HDAC9_HUMAN_0	238.239
FBX5_HUMAN	FBX5_HUMAN_0	144.148
CAVN1_HUMAN	CAVN1_HUMAN_0	35,39,45
CAVN1_HUMAN	CAVN1_HUMAN_1	364,365,375,378,386,388
CAVN1_HUMAN	CAVN1_HUMAN_2	155,166,168,170,174,201,202
CAVN1_HUMAN	CAVN1_HUMAN_3	299.301
DEAF1_HUMAN	DEAF1_HUMAN_0	170,175,178
TAB2_HUMAN	TAB2_HUMAN_0	523.526
ROA3_HUMAN	ROA3_HUMAN_0	354,355,357,359,363,365,369,372,374
ROA3_HUMAN	ROA3_HUMAN_1	111.115
BAZ1A_HUMAN	BAZ1A_HUMAN_0	1366,1370,1412,1416
BAZ1A_HUMAN	BAZ1A_HUMAN_1	959.96
SWAHA_HUMAN	SWAHA_HUMAN_0	251.259
GOGB1_HUMAN	GOGB1_HUMAN_0	537,550,552
TRAK1_HUMAN	TRAK1_HUMAN_0	485,488,538,540
TRAK1_HUMAN	TRAK1_HUMAN_1	199.202
TRAK1_HUMAN	TRAK1_HUMAN_2	713.718
KMT2B_HUMAN	KMT2B_HUMAN_0	1934,1935,2067,2069
KMT2B_HUMAN	KMT2B_HUMAN_1	1031,1034,1038,1084,1091,1094
PHF2_HUMAN	PHF2_HUMAN_0	457,458,473,478,536,538,540
PHF2_HUMAN	PHF2_HUMAN_1	653.654
PHF2_HUMAN	PHF2_HUMAN_2	729,732,733,737
PHF2_HUMAN	PHF2_HUMAN_3	878,881,898,904,906
PHF2_HUMAN	PHF2_HUMAN_4	1055,1057,1058,1063
COG3_HUMAN	COG3_HUMAN_0	532.535
CUX1_HUMAN	CUX1_HUMAN_0	1320,1332,1336,1453,1457
CUX1_HUMAN	CUX1_HUMAN_1	1058.11
STK4_HUMAN	STK4_HUMAN_0	319,326,328
DC1I1_HUMAN	DC1I1_HUMAN_0	104,106,110,175,178
SPAT2_HUMAN	SPAT2_HUMAN_0	252.256
IN35_HUMAN	IN35_HUMAN_0	35.43
M3K2_HUMAN	M3K2_HUMAN_0	152,162,163,238,239,247
M3K2_HUMAN	M3K2_HUMAN_1	330,336,343,348
RILP_HUMAN	RILP_HUMAN_0	313.314
DNJC2_HUMAN	DNJC2_HUMAN_0	46,48,59,62
DEN5A_HUMAN	DEN5A_HUMAN_0	1078,1084,1086,1095
CNR2_HUMAN	CNR2_HUMAN_0	334,335,337
NUDT9_HUMAN	NUDT9_HUMAN_0	67.72
FA83H_HUMAN	FA83H_HUMAN_0	512,513,515,522
FA83H_HUMAN	FA83H_HUMAN_1	4,7,8
FA83H_HUMAN	FA83H_HUMAN_2	841,843,849,869,880,882,891,893,894,902,904,913,924,935,937
FA83H_HUMAN	FA83H_HUMAN_3	1002,1008,1009
AN32B_HUMAN	AN32B_HUMAN_0	95.103
DENR_HUMAN	DENR_HUMAN_0	68,72,80
GPT2L_HUMAN	GPT2L_HUMAN_0	85,87,90
MPP5_HUMAN	MPP5_HUMAN_0	82.83
TMC8_HUMAN	TMC8_HUMAN_0	655,657,665,668,672
MGAP_HUMAN	MGAP_HUMAN_0	1421.14
AKA12_HUMAN	AKA12_HUMAN_0	1723.17
AKA12_HUMAN	AKA12_HUMAN_1	279,282,284,285
AKA12_HUMAN	AKA12_HUMAN_2	370.373
AKA12_HUMAN	AKA12_HUMAN_3	471,476,482,504,513,520,521,528,553,556
AKA12_HUMAN	AKA12_HUMAN_4	596,597,607,611,617,626,628,639,641,643,644,645,647,648,650,695,696,697
AKA12_HUMAN	AKA12_HUMAN_5	782.786
AKA12_HUMAN	AKA12_HUMAN_6	1327,1330,1390,1394
COTL1_HUMAN	COTL1_HUMAN_0	136.14
NOP14_HUMAN	NOP14_HUMAN_0	145.147
SMCR8_HUMAN	SMCR8_HUMAN_0	413,416,420,464,466,467,470,486,488,491,493,497
AHNK2_HUMAN	AHNK2_HUMAN_0	5704,5706,5708
UBR3_HUMAN	UBR3_HUMAN_0	1198.12
UT14A_HUMAN	UT14A_HUMAN_0	340,342,404,406,447,450,457
UT14A_HUMAN	UT14A_HUMAN_1	28.3
CE030_HUMAN	CE030_HUMAN_0	24,36,37,41
PCNT_HUMAN	PCNT_HUMAN_0	2341.24
DDX3X_HUMAN	DDX3X_HUMAN_0	593,604,605,611
DDX3X_HUMAN	DDX3X_HUMAN_1	52,61,68,69,70,73,81,82,89,91
S29A4_HUMAN	S29A4_HUMAN_0	305.309
SPTN2_HUMAN	SPTN2_HUMAN_0	2353.24
CD226_HUMAN	CD226_HUMAN_0	321.328
XIRP1_HUMAN	XIRP1_HUMAN_0	204.207
DLG3_HUMAN	DLG3_HUMAN_0	494,502,504
VINC_HUMAN	VINC_HUMAN_0	259,271,274
VINC_HUMAN	VINC_HUMAN_1	720.725
VINC_HUMAN	VINC_HUMAN_2	565,573,578,599,603
VINC_HUMAN	VINC_HUMAN_3	786.794
NXF1_HUMAN	NXF1_HUMAN_0	555,556,557
CDT1_HUMAN	CDT1_HUMAN_0	390,393,401
TANK_HUMAN	TANK_HUMAN_0	224.227
CWC25_HUMAN	CWC25_HUMAN_0	292,294,315,317
RIPL1_HUMAN	RIPL1_HUMAN_0	321.322
RIPL1_HUMAN	RIPL1_HUMAN_1	357.36
EHBP1_HUMAN	EHBP1_HUMAN_0	170,173,176
EHBP1_HUMAN	EHBP1_HUMAN_1	425,427,431,435
EHBP1_HUMAN	EHBP1_HUMAN_2	758,765,766,767
CAVN2_HUMAN	CAVN2_HUMAN_0	191,195,202,203
CAVN2_HUMAN	CAVN2_HUMAN_1	282,283,286,287,292,295
CAVN2_HUMAN	CAVN2_HUMAN_2	365,369,394,398,402
CAVN2_HUMAN	CAVN2_HUMAN_3	26,30,31,32,34,36
WASF2_HUMAN	WASF2_HUMAN_0	473,481,483,487,488,496
PHIP_HUMAN	PHIP_HUMAN_0	1280.13
PHIP_HUMAN	PHIP_HUMAN_1	673,676,682,691
PHIP_HUMAN	PHIP_HUMAN_2	878,879,880
PHIP_HUMAN	PHIP_HUMAN_3	135.141
PHIP_HUMAN	PHIP_HUMAN_4	1474.15
EFR3A_HUMAN	EFR3A_HUMAN_0	687,693,697
EFR3A_HUMAN	EFR3A_HUMAN_1	218.219
RL4_HUMAN	RL4_HUMAN_0	289.294
CACB2_HUMAN	CACB2_HUMAN_0	549.553
CENPR_HUMAN	CENPR_HUMAN_0	27.32
CIZ1_HUMAN	CIZ1_HUMAN_0	137.143
BORC6_HUMAN	BORC6_HUMAN_0	195.198
CCDC8_HUMAN	CCDC8_HUMAN_0	141.145
ZC21A_HUMAN	ZC21A_HUMAN_0	220.222
MSH6_HUMAN	MSH6_HUMAN_0	62.64
MSH6_HUMAN	MSH6_HUMAN_1	199,215,218,226,251,253,255,260
ADRB2_HUMAN	ADRB2_HUMAN_0	245,260,261
ADRB2_HUMAN	ADRB2_HUMAN_1	354.355
TRPV2_HUMAN	TRPV2_HUMAN_0	740.75
SHRM2_HUMAN	SHRM2_HUMAN_0	311,312,322,324
SHRM2_HUMAN	SHRM2_HUMAN_1	920,921,1170,1172
SHRM2_HUMAN	SHRM2_HUMAN_2	173,176,192,207,209
PHAG1_HUMAN	PHAG1_HUMAN_0	162,169,170
PHAG1_HUMAN	PHAG1_HUMAN_1	294,295,297,316,317
PHAG1_HUMAN	PHAG1_HUMAN_2	353,358,360
PHAG1_HUMAN	PHAG1_HUMAN_3	416.418
NJMU_HUMAN	NJMU_HUMAN_0	7,17,18,23
MED1_HUMAN	MED1_HUMAN_0	950.952
MED1_HUMAN	MED1_HUMAN_1	1206,1214,1217,1222
MED1_HUMAN	MED1_HUMAN_2	1400,1402,1432,1436,1439,1456,1462,1464,1478,1480,1481
MED1_HUMAN	MED1_HUMAN_3	662,663,670,671,672,674,769,770,771,773
ASPP1_HUMAN	ASPP1_HUMAN_0	331,334,670,672,680
TB10B_HUMAN	TB10B_HUMAN_0	655,656,657,660
TB10B_HUMAN	TB10B_HUMAN_1	706,708,711,712
TB10B_HUMAN	TB10B_HUMAN_2	151,153,155
RGS4_HUMAN	RGS4_HUMAN_0	102.107
RIC8B_HUMAN	RIC8B_HUMAN_0	467.472
LARP4_HUMAN	LARP4_HUMAN_0	381,384,387,391,403,423,424,582,585,587,590,594,596
LARP4_HUMAN	LARP4_HUMAN_1	642,646,648
LARP4_HUMAN	LARP4_HUMAN_2	71,72,74
CSCL2_HUMAN	CSCL2_HUMAN_0	95,101,109,110,112,113,114
ITPR2_HUMAN	ITPR2_HUMAN_0	2632.26
ITPR2_HUMAN	ITPR2_HUMAN_1	1854.19
TM206_HUMAN	TM206_HUMAN_0	9,13,23
AMOT_HUMAN	AMOT_HUMAN_0	711,713,717
BORG2_HUMAN	BORG2_HUMAN_0	88,89,90,99
CA174_HUMAN	CA174_HUMAN_0	19,21,27
RB15B_HUMAN	RB15B_HUMAN_0	597,599,608,610
RB15B_HUMAN	RB15B_HUMAN_1	99,108,112
RB15B_HUMAN	RB15B_HUMAN_2	264.266
NFIC_HUMAN	NFIC_HUMAN_0	191.193
NFIC_HUMAN	NFIC_HUMAN_1	269,272,283,293,298,300,301,304,306,309,321,322,327,332,336,338,342
PLCG2_HUMAN	PLCG2_HUMAN_0	1258.13
MPZL1_HUMAN	MPZL1_HUMAN_0	231,233,240
ATX2L_HUMAN	ATX2L_HUMAN_0	30.31
ATX2L_HUMAN	ATX2L_HUMAN_1	235.237
ATX2L_HUMAN	ATX2L_HUMAN_2	304,305,334,338,340,343
ATX2L_HUMAN	ATX2L_HUMAN_3	405.408
ATX2L_HUMAN	ATX2L_HUMAN_4	492,495,499,556,557,558,593,596,597,617,629,631,633,679,682,683
BATF_HUMAN	BATF_HUMAN_0	42.47
TCEA1_HUMAN	TCEA1_HUMAN_0	95,96,99,125,134,135
VPS4B_HUMAN	VPS4B_HUMAN_0	101.107
DDX46_HUMAN	DDX46_HUMAN_0	293,294,295
ROA0_HUMAN	ROA0_HUMAN_0	67,83,87
ROA0_HUMAN	ROA0_HUMAN_1	278.279
EF2K_HUMAN	EF2K_HUMAN_0	347,352,358,363,365,379,391,394,395,397,398,434,437,444,469,473,476
EF2K_HUMAN	EF2K_HUMAN_1	17,26,30,70,71,73,77
JAM1_HUMAN	JAM1_HUMAN_0	279,280,283,286,294,295
XRCC4_HUMAN	XRCC4_HUMAN_0	221,228,231,232,236
XRCC4_HUMAN	XRCC4_HUMAN_1	319,322,326,327
RB6I2_HUMAN	RB6I2_HUMAN_0	6,13,14,16,20,26,34,36,37,40
MYO1F_HUMAN	MYO1F_HUMAN_0	987,991,1000
PSA3_HUMAN	PSA3_HUMAN_0	242.249
TBC9B_HUMAN	TBC9B_HUMAN_0	1237,1238,1240
TBC9B_HUMAN	TBC9B_HUMAN_1	390.396
ADA19_HUMAN	ADA19_HUMAN_0	768.778
RN219_HUMAN	RN219_HUMAN_0	523,524,525
RN219_HUMAN	RN219_HUMAN_1	567.569
SPAT5_HUMAN	SPAT5_HUMAN_0	271.273
IGF1R_HUMAN	IGF1R_HUMAN_0	1277,1279,1280
RFX7_HUMAN	RFX7_HUMAN_0	1024,1027,1068,1070,1080
LDLR_HUMAN	LDLR_HUMAN_0	844,845,846
PALMD_HUMAN	PALMD_HUMAN_0	497,502,514,519
PALMD_HUMAN	PALMD_HUMAN_1	252,261,270,277
PALMD_HUMAN	PALMD_HUMAN_2	363,369,383,384
PHRF1_HUMAN	PHRF1_HUMAN_0	863.866
PHRF1_HUMAN	PHRF1_HUMAN_1	1031,1033,1123,1125,1126,1127,1162,1164
IN80D_HUMAN	IN80D_HUMAN_0	129.131
RHG09_HUMAN	RHG09_HUMAN_0	466,468,474
GUC2F_HUMAN	GUC2F_HUMAN_0	857.867
SGIP1_HUMAN	SGIP1_HUMAN_0	315,318,327,334,485,490,492
SGIP1_HUMAN	SGIP1_HUMAN_1	148,159,168,179,181
SGIP1_HUMAN	SGIP1_HUMAN_2	258,262,264
CLSPN_HUMAN	CLSPN_HUMAN_0	1313.13
CLSPN_HUMAN	CLSPN_HUMAN_1	722.723
CLSPN_HUMAN	CLSPN_HUMAN_2	807.809
CLSPN_HUMAN	CLSPN_HUMAN_3	64.66
COG7_HUMAN	COG7_HUMAN_0	503.505
MYO5A_HUMAN	MYO5A_HUMAN_0	1112,1114,1115,1117,1118
MYO5A_HUMAN	MYO5A_HUMAN_1	1649,1650,1651
SRP14_HUMAN	SRP14_HUMAN_0	36.44
DCAF6_HUMAN	DCAF6_HUMAN_0	648,653,656
DCAF6_HUMAN	DCAF6_HUMAN_1	846.849
MK07_HUMAN	MK07_HUMAN_0	769,773,775
MK07_HUMAN	MK07_HUMAN_1	730.732
UBP47_HUMAN	UBP47_HUMAN_0	1351.14
UBP47_HUMAN	UBP47_HUMAN_1	1004,1007,1012,1014,1016
SAP30_HUMAN	SAP30_HUMAN_0	130,137,144
DGKG_HUMAN	DGKG_HUMAN_0	778.781
TBCD1_HUMAN	TBCD1_HUMAN_0	502,504,506
TBCD1_HUMAN	TBCD1_HUMAN_1	558,564,565,569,570,572,584,595,597,613,617,626
TBCD1_HUMAN	TBCD1_HUMAN_2	234.236
ACKR3_HUMAN	ACKR3_HUMAN_0	349,353,354
ITB2_HUMAN	ITB2_HUMAN_0	757,758,759
TGFR2_HUMAN	TGFR2_HUMAN_0	547,550,552
UBP8_HUMAN	UBP8_HUMAN_0	715,717,718,722
UBP8_HUMAN	UBP8_HUMAN_1	152.159
YBOX1_HUMAN	YBOX1_HUMAN_0	144,157,161,164,166,173,175,207,208
YBOX1_HUMAN	YBOX1_HUMAN_1	312.313
YBOX1_HUMAN	YBOX1_HUMAN_2	1.2
KCC4_HUMAN	KCC4_HUMAN_0	340.344
FOXK1_HUMAN	FOXK1_HUMAN_0	415,419,421,427,435,440,444
FOXK1_HUMAN	FOXK1_HUMAN_1	212,218,222,235,238,242,244,246,248,252,256,294,298
SMAG1_HUMAN	SMAG1_HUMAN_0	715.716
SMAG1_HUMAN	SMAG1_HUMAN_1	418,419,422,423
SMAG1_HUMAN	SMAG1_HUMAN_2	577.579
TANC2_HUMAN	TANC2_HUMAN_0	168,170,172
TANC2_HUMAN	TANC2_HUMAN_1	1441,1456,1457,1461
TANC2_HUMAN	TANC2_HUMAN_2	1529.15
TANC2_HUMAN	TANC2_HUMAN_3	1578.16
TANC2_HUMAN	TANC2_HUMAN_4	1721,1724,1739,1743,1823,1826
TANC2_HUMAN	TANC2_HUMAN_5	399,403,429,433
LIPA1_HUMAN	LIPA1_HUMAN_0	237,238,241,243
LIPA1_HUMAN	LIPA1_HUMAN_1	665,667,692,696
LIPA1_HUMAN	LIPA1_HUMAN_2	739,740,743,744,760,762
LIPA1_HUMAN	LIPA1_HUMAN_3	1132,1138,1155,1158,1170,1171,1173
K1549_HUMAN	K1549_HUMAN_0	1387.14
K1549_HUMAN	K1549_HUMAN_1	1621.16
BAZ2A_HUMAN	BAZ2A_HUMAN_0	133.134
BAZ2A_HUMAN	BAZ2A_HUMAN_1	1182.12
BAZ2A_HUMAN	BAZ2A_HUMAN_2	1396.14
DDR1_HUMAN	DDR1_HUMAN_0	512.519
T22D4_HUMAN	T22D4_HUMAN_0	56.61
T22D4_HUMAN	T22D4_HUMAN_1	157,164,166
T22D4_HUMAN	T22D4_HUMAN_2	224,228,232,259,263,267,278
CTNA1_HUMAN	CTNA1_HUMAN_0	633,640,644,651,653,654,657
M18BP_HUMAN	M18BP_HUMAN_0	107.109
M18BP_HUMAN	M18BP_HUMAN_1	771.772
FLI1_HUMAN	FLI1_HUMAN_0	34,36,38,41
PRD15_HUMAN	PRD15_HUMAN_0	980.983
ADRB1_HUMAN	ADRB1_HUMAN_0	411,422,427,460,461
MAP7_HUMAN	MAP7_HUMAN_0	180,182,183,199,201,202,208,218,222,230,234,241
TRI33_HUMAN	TRI33_HUMAN_0	1101,1104,1118
TRI33_HUMAN	TRI33_HUMAN_1	802,808,811,812,814,818
PNISR_HUMAN	PNISR_HUMAN_0	285,289,303,304,308,310,312,320
PNISR_HUMAN	PNISR_HUMAN_1	570,572,574,576,596,600,610,612
ADCY6_HUMAN	ADCY6_HUMAN_0	571.575
SGK3_HUMAN	SGK3_HUMAN_0	125.128
P4K2A_HUMAN	P4K2A_HUMAN_0	459,461,463,464,465,467
P4K2A_HUMAN	P4K2A_HUMAN_1	4,8,43,46,50
WDTC1_HUMAN	WDTC1_HUMAN_0	510.512
UBE2Z_HUMAN	UBE2Z_HUMAN_0	336,338,339,340
P5CS_HUMAN	P5CS_HUMAN_0	426.428
CLASR_HUMAN	CLASR_HUMAN_0	262,266,284,287,293,316,318,326,330,334
CLASR_HUMAN	CLASR_HUMAN_1	498,500,532,534
CLASR_HUMAN	CLASR_HUMAN_2	644,646,648
SPB1_HUMAN	SPB1_HUMAN_0	457,466,467,470
SPB1_HUMAN	SPB1_HUMAN_1	332,334,335,346,355
TGFR1_HUMAN	TGFR1_HUMAN_0	185,186,188,190
E41LA_HUMAN	E41LA_HUMAN_0	388,392,444,447
E41LA_HUMAN	E41LA_HUMAN_1	540,542,648,651
TOM1_HUMAN	TOM1_HUMAN_0	461.463
TOM1_HUMAN	TOM1_HUMAN_1	159.163
NCOR1_HUMAN	NCOR1_HUMAN_0	1591.16
NCOR1_HUMAN	NCOR1_HUMAN_1	1194.12
NCOR1_HUMAN	NCOR1_HUMAN_2	1521,1527,1532
NCOR1_HUMAN	NCOR1_HUMAN_3	69,72,156,157
NCOR1_HUMAN	NCOR1_HUMAN_4	1749,1755,1757,1976,1979,1980
NCOR1_HUMAN	NCOR1_HUMAN_5	2183,2186,2201,2217,2218,2223
NCOR1_HUMAN	NCOR1_HUMAN_6	2334.23
NCOR1_HUMAN	NCOR1_HUMAN_7	2435.24
KCNA2_HUMAN	KCNA2_HUMAN_0	439,440,448,450
RBGP1_HUMAN	RBGP1_HUMAN_0	133.136
RBGP1_HUMAN	RBGP1_HUMAN_1	490,498,507
DDX5_HUMAN	DDX5_HUMAN_0	23.29
PP1G_HUMAN	PP1G_HUMAN_0	306.31
CD11B_HUMAN	CD11B_HUMAN_0	64,66,71,112,114,231,233,276,282,284,409,413
CD11B_HUMAN	CD11B_HUMAN_1	750,751,762
PHLB3_HUMAN	PHLB3_HUMAN_0	390.392
AN13A_HUMAN	AN13A_HUMAN_0	519.523
WASP_HUMAN	WASP_HUMAN_0	482.483
CCND2_HUMAN	CCND2_HUMAN_0	279.281
ARH_HUMAN	ARH_HUMAN_0	13.15
RIPK1_HUMAN	RIPK1_HUMAN_0	13.14
HNF4A_HUMAN	HNF4A_HUMAN_0	138,141,142,147
HNF4A_HUMAN	HNF4A_HUMAN_1	428,431,435
PKHA2_HUMAN	PKHA2_HUMAN_0	313,315,321
PKHA2_HUMAN	PKHA2_HUMAN_1	181.183
NOP58_HUMAN	NOP58_HUMAN_0	501,507,508,509,513
MB12B_HUMAN	MB12B_HUMAN_0	200,203,204,206,223,225
CBX8_HUMAN	CBX8_HUMAN_0	189.19
4EBP3_HUMAN	4EBP3_HUMAN_0	22.31
4EBP3_HUMAN	4EBP3_HUMAN_1	50.55
EVI5_HUMAN	EVI5_HUMAN_0	775.777
EVI5_HUMAN	EVI5_HUMAN_1	101,104,112
CEP68_HUMAN	CEP68_HUMAN_0	471.477
RPB1_HUMAN	RPB1_HUMAN_0	1615,1618,1810,1811,1814,1818,1821,1827,1828,1831,1835,1838,1839,1841,1842,1844,1846,1848,1849,1852,1853,1856,1859,1862,1863,1866,1867,1869,1870,1873,1874,1876,1877,1879,1880,1881,1883,1884,1887,1888,1890,1891,1893,1898,1901,1902,1904,1905,1908,1909,1911,1912,1914,1915,1916,1918,1919,1922,1923,1925,1926,1928,1929,1930,1932,1933
QSER1_HUMAN	QSER1_HUMAN_0	1229,1230,1340,1347,1353
GARL3_HUMAN	GARL3_HUMAN_0	423,425,431
GARL3_HUMAN	GARL3_HUMAN_1	823.826
PI51A_HUMAN	PI51A_HUMAN_0	457,459,467
PI51A_HUMAN	PI51A_HUMAN_1	67.7
ACTB_HUMAN	ACTB_HUMAN_0	51.52
ACTB_HUMAN	ACTB_HUMAN_1	361,364,367
ACTB_HUMAN	ACTB_HUMAN_2	228,232,234,238,239
NDEL1_HUMAN	NDEL1_HUMAN_0	193,196,197,207,214,218,230,241,244
ODPAT_HUMAN	ODPAT_HUMAN_0	290,292,297
SL9A8_HUMAN	SL9A8_HUMAN_0	570.572
SL9A8_HUMAN	SL9A8_HUMAN_1	506.509
P85B_HUMAN	P85B_HUMAN_0	452,459,463,466
DOCK5_HUMAN	DOCK5_HUMAN_0	1788,1793,1801,1802,1804,1807
SC6A3_HUMAN	SC6A3_HUMAN_0	1,3,6,11,12
RS7_HUMAN	RS7_HUMAN_0	120.122
MTSSL_HUMAN	MTSSL_HUMAN_0	259,262,263,265,273,276,282
MTSSL_HUMAN	MTSSL_HUMAN_1	537,538,566,568,569,572,578,579
SBNO1_HUMAN	SBNO1_HUMAN_0	691,692,696,753,754
ARHG2_HUMAN	ARHG2_HUMAN_0	108,120,121,124,128,136,141,142,150,162,171,173,174,176
ARHG2_HUMAN	ARHG2_HUMAN_1	931,939,940,944,946,951,952,955,959
ARHG2_HUMAN	ARHG2_HUMAN_2	644.647
RL17_HUMAN	RL17_HUMAN_0	140.141
WRIP1_HUMAN	WRIP1_HUMAN_0	64,74,76,77,84,86,90,91
WRIP1_HUMAN	WRIP1_HUMAN_1	150.152
CSKI1_HUMAN	CSKI1_HUMAN_0	774,778,786
CSKI1_HUMAN	CSKI1_HUMAN_1	1064.11
PP2AA_HUMAN	PP2AA_HUMAN_0	303.306
INF2_HUMAN	INF2_HUMAN_0	1075,1076,1146,1147,1148,1178,1182,1186,1187,1191,1193,1198,1200,1201,1203,1205
CERS5_HUMAN	CERS5_HUMAN_0	349,353,354,355
TAF12_HUMAN	TAF12_HUMAN_0	42,50,58
NBR1_HUMAN	NBR1_HUMAN_0	333.339
NBR1_HUMAN	NBR1_HUMAN_1	589.595
VAMP5_HUMAN	VAMP5_HUMAN_0	40,47,48
SUN2_HUMAN	SUN2_HUMAN_0	8,11,18,21,25
SUN2_HUMAN	SUN2_HUMAN_1	106,109,111,112
COEA1_HUMAN	COEA1_HUMAN_0	1727.17
TBC24_HUMAN	TBC24_HUMAN_0	471.479
SMG1_HUMAN	SMG1_HUMAN_0	31.33
SMG1_HUMAN	SMG1_HUMAN_1	1902,1906,1909
SMG1_HUMAN	SMG1_HUMAN_2	3549,3555,3568,3569,3572,3575,3576,3587
SAMN1_HUMAN	SAMN1_HUMAN_0	20,21,22
SAMN1_HUMAN	SAMN1_HUMAN_1	178.18
NDRG4_HUMAN	NDRG4_HUMAN_0	314,316,321
NUCB1_HUMAN	NUCB1_HUMAN_0	368.371
NUCB1_HUMAN	NUCB1_HUMAN_1	81.85
DOC11_HUMAN	DOC11_HUMAN_0	157.16
DOC11_HUMAN	DOC11_HUMAN_1	295.305
DOC11_HUMAN	DOC11_HUMAN_2	1207,1222,1224,1236,1239,1266,1270
F10C1_HUMAN	F10C1_HUMAN_0	8.11
F10C1_HUMAN	F10C1_HUMAN_1	282.284
FOSL2_HUMAN	FOSL2_HUMAN_0	15,16,18
FOSL2_HUMAN	FOSL2_HUMAN_1	306,307,309,319,321
NS1BP_HUMAN	NS1BP_HUMAN_0	321,325,327,335,337
NS1BP_HUMAN	NS1BP_HUMAN_1	267,275,276
JAK2_HUMAN	JAK2_HUMAN_0	1006.1
HMHA1_HUMAN	HMHA1_HUMAN_0	92,95,98
HMHA1_HUMAN	HMHA1_HUMAN_1	563,568,577,591,599,618,624
UBXN1_HUMAN	UBXN1_HUMAN_0	198,199,201,206
VPP1_HUMAN	VPP1_HUMAN_0	362.363
EIF3D_HUMAN	EIF3D_HUMAN_0	519,525,527,528
EIF3D_HUMAN	EIF3D_HUMAN_1	307,316,317
SHKB1_HUMAN	SHKB1_HUMAN_0	646,648,661
TLE4_HUMAN	TLE4_HUMAN_0	205,207,242,244,249,264,268,272,291,294,301,317,320,324
BC11B_HUMAN	BC11B_HUMAN_0	375,380,397,400,404,405
BC11B_HUMAN	BC11B_HUMAN_1	495,496,556,559
BC11B_HUMAN	BC11B_HUMAN_2	752,753,771,774,775,787,788,794
CUX2_HUMAN	CUX2_HUMAN_0	634,636,641
A16L1_HUMAN	A16L1_HUMAN_0	288.289
A16L1_HUMAN	A16L1_HUMAN_1	268.277
GSK3A_HUMAN	GSK3A_HUMAN_0	1,6,13,18,19,20,38,40
BBX_HUMAN	BBX_HUMAN_0	837,843,848
PNPO_HUMAN	PNPO_HUMAN_0	163.164
DOCK2_HUMAN	DOCK2_HUMAN_0	1684,1687,1688,1704,1705,1723,1730,1732
DOCK2_HUMAN	DOCK2_HUMAN_1	1783.18
DOCK2_HUMAN	DOCK2_HUMAN_2	208.211
DOCK2_HUMAN	DOCK2_HUMAN_3	586.587
TM10A_HUMAN	TM10A_HUMAN_0	303,306,317
MYO1E_HUMAN	MYO1E_HUMAN_0	986,988,989,1001,1002,1004,1010
C2D1B_HUMAN	C2D1B_HUMAN_0	592.595
C2D1B_HUMAN	C2D1B_HUMAN_1	523.529
TM45B_HUMAN	TM45B_HUMAN_0	269.271
CP054_HUMAN	CP054_HUMAN_0	111.115
NECT4_HUMAN	NECT4_HUMAN_0	443.445
SEC13_HUMAN	SEC13_HUMAN_0	308.312
PKP2_HUMAN	PKP2_HUMAN_0	288,292,293,296
PKP2_HUMAN	PKP2_HUMAN_1	649.658
PKP2_HUMAN	PKP2_HUMAN_2	131,134,150,153,154,165,167
CD20_HUMAN	CD20_HUMAN_0	1,6,34,35
EMB_HUMAN	EMB_HUMAN_0	305,308,323
TNNI2_HUMAN	TNNI2_HUMAN_0	179.181
MCMBP_HUMAN	MCMBP_HUMAN_0	153,159,166
ARHGC_HUMAN	ARHGC_HUMAN_0	631,634,636
ARHGC_HUMAN	ARHGC_HUMAN_1	336.34
ARHGC_HUMAN	ARHGC_HUMAN_2	8,21,27,40
CBLB_HUMAN	CBLB_HUMAN_0	664,671,677,678
CBLB_HUMAN	CBLB_HUMAN_1	881,885,888,895
CBLB_HUMAN	CBLB_HUMAN_2	475,478,479,482,483,520,524,528
PP2AB_HUMAN	PP2AB_HUMAN_0	303.306
SPTB1_HUMAN	SPTB1_HUMAN_0	2109,2113,2116,2122,2124,2127
SPTB1_HUMAN	SPTB1_HUMAN_1	34.35
PARVA_HUMAN	PARVA_HUMAN_0	2,3,7,13,15,18,21,27,35
HSP74_HUMAN	HSP74_HUMAN_0	537.545
HSP74_HUMAN	HSP74_HUMAN_1	625.632
MYCN_HUMAN	MYCN_HUMAN_0	57,61,63
ZWILC_HUMAN	ZWILC_HUMAN_0	87.9
RGCC_HUMAN	RGCC_HUMAN_0	74,86,88,90,96,98,101,110
ZSC18_HUMAN	ZSC18_HUMAN_0	9.13
REPS1_HUMAN	REPS1_HUMAN_0	389.391
REPS1_HUMAN	REPS1_HUMAN_1	474,480,481,534,536,538,539,543,557,561
REPS1_HUMAN	REPS1_HUMAN_2	103,114,117
REPS1_HUMAN	REPS1_HUMAN_3	161,165,169
REPS1_HUMAN	REPS1_HUMAN_4	271,272,273,274
TPX2_HUMAN	TPX2_HUMAN_0	112,120,124
TPX2_HUMAN	TPX2_HUMAN_1	368,373,481,485
LUZP1_HUMAN	LUZP1_HUMAN_0	952,955,957,992,994,995
ADA22_HUMAN	ADA22_HUMAN_0	831.833
ADA22_HUMAN	ADA22_HUMAN_1	868,869,872
STRN3_HUMAN	STRN3_HUMAN_0	201,206,208,213
GGT7_HUMAN	GGT7_HUMAN_0	55,59,71,72,73,74,78,82
RSRP1_HUMAN	RSRP1_HUMAN_0	77,79,81,83
GBX2_HUMAN	GBX2_HUMAN_0	311.313
CLK1_HUMAN	CLK1_HUMAN_0	137.139
CLK1_HUMAN	CLK1_HUMAN_1	337,340,341
BICD1_HUMAN	BICD1_HUMAN_0	545,547,568,569,575,588
KCNC3_HUMAN	KCNC3_HUMAN_0	2.8
1433B_HUMAN	1433B_HUMAN_0	59.65
1433B_HUMAN	1433B_HUMAN_1	1,5,20
DOP1_HUMAN	DOP1_HUMAN_0	1265.13
CGNL1_HUMAN	CGNL1_HUMAN_0	292,295,296,297,298,299,300,301,304
CGNL1_HUMAN	CGNL1_HUMAN_1	197,201,203
CGNL1_HUMAN	CGNL1_HUMAN_2	387.39
GRM1A_HUMAN	GRM1A_HUMAN_0	256,262,266,270,276,280
DCAF8_HUMAN	DCAF8_HUMAN_0	20.26
DCAF8_HUMAN	DCAF8_HUMAN_1	128.129
TANC1_HUMAN	TANC1_HUMAN_0	206,213,217
TANC1_HUMAN	TANC1_HUMAN_1	60,62,65,66
TANC1_HUMAN	TANC1_HUMAN_2	443.447
CATIN_HUMAN	CATIN_HUMAN_0	70,84,85,87,89
HS12B_HUMAN	HS12B_HUMAN_0	24,28,41,43,45
MIER1_HUMAN	MIER1_HUMAN_0	157,159,165
MIER1_HUMAN	MIER1_HUMAN_1	482,487,490
CPSF1_HUMAN	CPSF1_HUMAN_0	755.765
PLPR4_HUMAN	PLPR4_HUMAN_0	399.402
RIPR1_HUMAN	RIPR1_HUMAN_0	346,348,350,354
RIPR1_HUMAN	RIPR1_HUMAN_1	19,21,28
CS024_HUMAN	CS024_HUMAN_0	116.119
NHSL2_HUMAN	NHSL2_HUMAN_0	131.133
NHSL2_HUMAN	NHSL2_HUMAN_1	468,470,472,642,645
VAPA_HUMAN	VAPA_HUMAN_0	163,165,169,213,214,215
CMTR1_HUMAN	CMTR1_HUMAN_0	27,28,29,30,50,52,54,56
STRP1_HUMAN	STRP1_HUMAN_0	334.338
STRP1_HUMAN	STRP1_HUMAN_1	58.61
BRDT_HUMAN	BRDT_HUMAN_0	642.643
MEF2D_HUMAN	MEF2D_HUMAN_0	97,105,109
SH3G1_HUMAN	SH3G1_HUMAN_0	286.287
M3K7_HUMAN	M3K7_HUMAN_0	438,443,454
M3K7_HUMAN	M3K7_HUMAN_1	360,366,370,388,392,404,414
MFA3L_HUMAN	MFA3L_HUMAN_0	297,302,305,306
TBRG1_HUMAN	TBRG1_HUMAN_0	404.409
LC7L2_HUMAN	LC7L2_HUMAN_0	16.17
LC7L2_HUMAN	LC7L2_HUMAN_1	280,282,284,304,308,322,326
LC7L2_HUMAN	LC7L2_HUMAN_2	377,382,383
KAP1_HUMAN	KAP1_HUMAN_0	70,72,76,82,84
RHG31_HUMAN	RHG31_HUMAN_0	345.348
SF3B2_HUMAN	SF3B2_HUMAN_0	301,302,306,308,310,342,343,345,346,430,434,435
SF3B2_HUMAN	SF3B2_HUMAN_1	777.779
PLPP1_HUMAN	PLPP1_HUMAN_0	263.272
VAPB_HUMAN	VAPB_HUMAN_0	145,155,157,158,163
CKLF8_HUMAN	CKLF8_HUMAN_0	8,12,26
RIOK1_HUMAN	RIOK1_HUMAN_0	20,21,23
BOP1_HUMAN	BOP1_HUMAN_0	121,125,126
SRP09_HUMAN	SRP09_HUMAN_0	81.84
MTAP2_HUMAN	MTAP2_HUMAN_0	820.822
MTAP2_HUMAN	MTAP2_HUMAN_1	1138,1153,1154,1157
MTAP2_HUMAN	MTAP2_HUMAN_2	1779,1781,1785,1786,1789,1794,1797,1798,1799,1801,1807
MTAP2_HUMAN	MTAP2_HUMAN_3	1346.14
MTAP2_HUMAN	MTAP2_HUMAN_4	1587,1589,1590,1591,1593,1594,1597,1598,1601,1604,1607,1608,1610,1612,1615,1618,1620,1621,1627,1630,1633,1648,1652,1655
ACACB_HUMAN	ACACB_HUMAN_0	194,199,215,219,221
SFSWA_HUMAN	SFSWA_HUMAN_0	805,814,823,831,833,899,900,904,908
SFSWA_HUMAN	SFSWA_HUMAN_1	278.282
UBP48_HUMAN	UBP48_HUMAN_0	885,886,887
ENL_HUMAN	ENL_HUMAN_0	313,314,358,360
1433Z_HUMAN	1433Z_HUMAN_0	206,209,210
1433Z_HUMAN	1433Z_HUMAN_1	27.36
1433Z_HUMAN	1433Z_HUMAN_2	228,229,231
1433Z_HUMAN	1433Z_HUMAN_3	56,57,63
CDC20_HUMAN	CDC20_HUMAN_0	40,50,54,58
IF2B3_HUMAN	IF2B3_HUMAN_0	179,183,186
OGFR_HUMAN	OGFR_HUMAN_0	419,422,483,487,636,640
TXND9_HUMAN	TXND9_HUMAN_0	220.222
RENT1_HUMAN	RENT1_HUMAN_0	1099,1106,1109,1110
RENT1_HUMAN	RENT1_HUMAN_1	1126.11
SMAG2_HUMAN	SMAG2_HUMAN_0	165,171,235,237,242,270,274,277
SMAG2_HUMAN	SMAG2_HUMAN_1	591,599,605,606
PURB_HUMAN	PURB_HUMAN_0	290,297,303
PURB_HUMAN	PURB_HUMAN_1	5.7
PURB_HUMAN	PURB_HUMAN_2	99.1
TRIM1_HUMAN	TRIM1_HUMAN_0	111.115
HMGN2_HUMAN	HMGN2_HUMAN_0	24.28
DCP1A_HUMAN	DCP1A_HUMAN_0	521,522,524,527,538
DCP1A_HUMAN	DCP1A_HUMAN_1	175,178,179
DCP1A_HUMAN	DCP1A_HUMAN_2	308,314,318
DCP1A_HUMAN	DCP1A_HUMAN_3	429.432
TEBP_HUMAN	TEBP_HUMAN_0	81.84
TEBP_HUMAN	TEBP_HUMAN_1	112,117,123,147,150
ATX2_HUMAN	ATX2_HUMAN_0	553.557
ATX2_HUMAN	ATX2_HUMAN_1	665,666,677,683,727,729,732,740,742,757,770,771
ATX2_HUMAN	ATX2_HUMAN_2	853,855,856,860,862,864,866,869,887,888
FOXJ2_HUMAN	FOXJ2_HUMAN_0	160,163,171
FOXJ2_HUMAN	FOXJ2_HUMAN_1	42.45
KCND2_HUMAN	KCND2_HUMAN_0	601,606,615
STX12_HUMAN	STX12_HUMAN_0	138.141
ARHG5_HUMAN	ARHG5_HUMAN_0	1116,1124,1125,1135
F102B_HUMAN	F102B_HUMAN_0	220,223,227
F102B_HUMAN	F102B_HUMAN_1	319.32
LARP6_HUMAN	LARP6_HUMAN_0	55.57
LARP6_HUMAN	LARP6_HUMAN_1	371,375,378,383
LARP6_HUMAN	LARP6_HUMAN_2	446.45
TM41B_HUMAN	TM41B_HUMAN_0	9.17
HUWE1_HUMAN	HUWE1_HUMAN_0	3918,3923,3926,3928,3929
HUWE1_HUMAN	HUWE1_HUMAN_1	3751,3752,3756,3759
HUWE1_HUMAN	HUWE1_HUMAN_2	3807,3815,3821
HUWE1_HUMAN	HUWE1_HUMAN_3	2916.29
HUWE1_HUMAN	HUWE1_HUMAN_4	3115,3116,3121,3126,3131
HUWE1_HUMAN	HUWE1_HUMAN_5	2196.22
HUWE1_HUMAN	HUWE1_HUMAN_6	2592,2594,2599
HUWE1_HUMAN	HUWE1_HUMAN_7	2261,2265,2361,2364,2365,2369,2376,2387,2390,2394
HUWE1_HUMAN	HUWE1_HUMAN_8	1076.11
HUWE1_HUMAN	HUWE1_HUMAN_9	647.648
HUWE1_HUMAN	HUWE1_HUMAN_10	1367.14
HUWE1_HUMAN	HUWE1_HUMAN_11	1902,1904,1906
GTF2I_HUMAN	GTF2I_HUMAN_0	819,820,822,829,830,838
GTF2I_HUMAN	GTF2I_HUMAN_1	667,673,676,678,686
GTF2I_HUMAN	GTF2I_HUMAN_2	555.557
MACF1_HUMAN	MACF1_HUMAN_0	7238,7240,7246,7250,7253,7278,7281
MACF1_HUMAN	MACF1_HUMAN_1	7313,7317,7321,7324,7325,7329,7332
MACF1_HUMAN	MACF1_HUMAN_2	5587,5591,5593
MACF1_HUMAN	MACF1_HUMAN_3	6966.7
MACF1_HUMAN	MACF1_HUMAN_4	4495.45
MACF1_HUMAN	MACF1_HUMAN_5	1366,1375,1377
MACF1_HUMAN	MACF1_HUMAN_6	3926.39
NOC2L_HUMAN	NOC2L_HUMAN_0	671,672,677
NOC2L_HUMAN	NOC2L_HUMAN_1	25,27,29
RC3H2_HUMAN	RC3H2_HUMAN_0	807.811
MCES_HUMAN	MCES_HUMAN_0	76.78
PCF11_HUMAN	PCF11_HUMAN_0	367,369,371,486,488,493,508,510
PCDH1_HUMAN	PCDH1_HUMAN_0	935,942,948,957,961,968,970,972,976,983,985,987,1016,1019,1021
MCF2L_HUMAN	MCF2L_HUMAN_0	1032.1
SPE39_HUMAN	SPE39_HUMAN_0	94,95,96,104,105,107,116,120,123,125,129,131
ERF_HUMAN	ERF_HUMAN_0	525,530,531,541,547
ERF_HUMAN	ERF_HUMAN_1	20.23
ERF_HUMAN	ERF_HUMAN_2	184,186,189,245,250
I2BPL_HUMAN	I2BPL_HUMAN_0	214,218,226,333,336
I2BPL_HUMAN	I2BPL_HUMAN_1	609.61
I2BPL_HUMAN	I2BPL_HUMAN_2	656,657,658,661,664
JUNB_HUMAN	JUNB_HUMAN_0	101.103
JUNB_HUMAN	JUNB_HUMAN_1	250,254,258
KAT6B_HUMAN	KAT6B_HUMAN_0	1300.13
UBA1_HUMAN	UBA1_HUMAN_0	3,12,20,23,27,30,45
UBA1_HUMAN	UBA1_HUMAN_1	799,809,815,819,831,834
NF2L2_HUMAN	NF2L2_HUMAN_0	343,346,350,355
RHG35_HUMAN	RHG35_HUMAN_0	1475.15
RHG35_HUMAN	RHG35_HUMAN_1	969,974,979,984
RHG35_HUMAN	RHG35_HUMAN_2	1084,1086,1104,1105
RHG35_HUMAN	RHG35_HUMAN_3	1173,1175,1178
OTU7A_HUMAN	OTU7A_HUMAN_0	574,577,579
DHX29_HUMAN	DHX29_HUMAN_0	191.199
ANR63_HUMAN	ANR63_HUMAN_0	330.331
DAXX_HUMAN	DAXX_HUMAN_0	494.497
DAXX_HUMAN	DAXX_HUMAN_1	687,689,736,738
BAZ1B_HUMAN	BAZ1B_HUMAN_0	704,707,709,715
BAZ1B_HUMAN	BAZ1B_HUMAN_1	311,317,325,326,329,344,358,360
BAZ1B_HUMAN	BAZ1B_HUMAN_2	151,157,159,160,165
RA1L2_HUMAN	RA1L2_HUMAN_0	284,285,288,294
RA1L2_HUMAN	RA1L2_HUMAN_1	90.94
E41L1_HUMAN	E41L1_HUMAN_0	429,436,440,442,460,465,474,476
E41L1_HUMAN	E41L1_HUMAN_1	539,540,543,545,549,563,577,579
E41L1_HUMAN	E41L1_HUMAN_2	638,647,649,651,666,671,677,684,685
E41L1_HUMAN	E41L1_HUMAN_3	863,866,869
E41L1_HUMAN	E41L1_HUMAN_4	59,67,68,74,77,78,85
UTF1_HUMAN	UTF1_HUMAN_0	17.2
DNER_HUMAN	DNER_HUMAN_0	720.721
EPHA2_HUMAN	EPHA2_HUMAN_0	569,578,586,587
EPHA2_HUMAN	EPHA2_HUMAN_1	770.771
EPHA2_HUMAN	EPHA2_HUMAN_2	896,897,898,900
UBP24_HUMAN	UBP24_HUMAN_0	1038,1040,1042
UBP24_HUMAN	UBP24_HUMAN_1	2558,2560,2564,2601,2603
UBP24_HUMAN	UBP24_HUMAN_2	1280,1284,1288,1298
UBP24_HUMAN	UBP24_HUMAN_3	1370,1371,1372
UBP24_HUMAN	UBP24_HUMAN_4	2076,2079,2080
UBP24_HUMAN	UBP24_HUMAN_5	1609,1611,1615
UBP24_HUMAN	UBP24_HUMAN_6	1137,1140,1142
[truncated: 4,305 more rows]

## Sheet: mouse_psite_islands
seq_id	isl_id	psite_crds
TIAM2_MOUSE	TIAM2_MOUSE_0	1511.15
TIAM2_MOUSE	TIAM2_MOUSE_1	748.75
CI114_MOUSE	CI114_MOUSE_0	373,377,380
GBRA1_MOUSE	GBRA1_MOUSE_0	373.374
CYB5B_MOUSE	CYB5B_MOUSE_0	2,8,15,18
CCSE2_MOUSE	CCSE2_MOUSE_0	219,221,223,225
AJUBA_MOUSE	AJUBA_MOUSE_0	128.132
AJUBA_MOUSE	AJUBA_MOUSE_1	271.273
SPA2L_MOUSE	SPA2L_MOUSE_0	325,328,333
REQU_MOUSE	REQU_MOUSE_0	112.116
REQU_MOUSE	REQU_MOUSE_1	243,247,250
RRP8_MOUSE	RRP8_MOUSE_0	57,61,63
RRP8_MOUSE	RRP8_MOUSE_1	161,162,164,171,174,176,179
BRD7_MOUSE	BRD7_MOUSE_0	38.41
BRD7_MOUSE	BRD7_MOUSE_1	474,481,482
APOA5_MOUSE	APOA5_MOUSE_0	51.57
APOA5_MOUSE	APOA5_MOUSE_1	357.36
MAGIX_MOUSE	MAGIX_MOUSE_0	255,256,260
PHF12_MOUSE	PHF12_MOUSE_0	130,132,133,135,143
PAN3_MOUSE	PAN3_MOUSE_0	295,298,299,306
JHD2C_MOUSE	JHD2C_MOUSE_0	186,190,193,195,196
JHD2C_MOUSE	JHD2C_MOUSE_1	321.323
JHD2C_MOUSE	JHD2C_MOUSE_2	470.473
JHD2C_MOUSE	JHD2C_MOUSE_3	991,995,997,1036,1038,1041
PKP3_MOUSE	PKP3_MOUSE_0	175,179,182,195,198
PKP3_MOUSE	PKP3_MOUSE_1	282.284
MYH9_MOUSE	MYH9_MOUSE_0	1325.13
MYH9_MOUSE	MYH9_MOUSE_1	1798,1802,1804,1914,1915
MYH9_MOUSE	MYH9_MOUSE_2	1938.19
2A5E_MOUSE	2A5E_MOUSE_0	29,31,32,33,37
DHE3_MOUSE	DHE3_MOUSE_0	408.409
DHE3_MOUSE	DHE3_MOUSE_1	226.227
IL16_MOUSE	IL16_MOUSE_0	136,140,192,194
IL16_MOUSE	IL16_MOUSE_1	831,837,838
CDS2_MOUSE	CDS2_MOUSE_0	19,21,29,31,33,35,39,44,45,49
PINLY_MOUSE	PINLY_MOUSE_0	108.11
Z518B_MOUSE	Z518B_MOUSE_0	527,530,535
KAD1_MOUSE	KAD1_MOUSE_0	134.135
MK12_MOUSE	MK12_MOUSE_0	1.2
RAB3B_MOUSE	RAB3B_MOUSE_0	187.189
RAB3B_MOUSE	RAB3B_MOUSE_1	2.4
ILK_MOUSE	ILK_MOUSE_0	171,172,174,180
PXDC2_MOUSE	PXDC2_MOUSE_0	506.511
FOSB_MOUSE	FOSB_MOUSE_0	331.333
CRCM1_MOUSE	CRCM1_MOUSE_0	295.297
CDC23_MOUSE	CDC23_MOUSE_0	575,577,581,583,587,592,593,595
MPP7_MOUSE	MPP7_MOUSE_0	322,326,335
NRAM2_MOUSE	NRAM2_MOUSE_0	20.22
NRAM2_MOUSE	NRAM2_MOUSE_1	563.566
ALR_MOUSE	ALR_MOUSE_0	13.16
TTC12_MOUSE	TTC12_MOUSE_0	66.7
ZC3HF_MOUSE	ZC3HF_MOUSE_0	367.37
SLK_MOUSE	SLK_MOUSE_0	339,340,343,346,347,353
SLK_MOUSE	SLK_MOUSE_1	642,644,646
SLK_MOUSE	SLK_MOUSE_2	774,776,778,811,813,815
E2F2_MOUSE	E2F2_MOUSE_0	118.124
HPS5_MOUSE	HPS5_MOUSE_0	659,660,661,663
HPS5_MOUSE	HPS5_MOUSE_1	431,436,438,439,442,460,462,466
AT11C_MOUSE	AT11C_MOUSE_0	1099,1104,1106,1108,1112,1120,1122,1125
TICRR_MOUSE	TICRR_MOUSE_0	817.819
TICRR_MOUSE	TICRR_MOUSE_1	918.92
TICRR_MOUSE	TICRR_MOUSE_2	1177,1179,1185,1186
TICRR_MOUSE	TICRR_MOUSE_3	1353.14
IF140_MOUSE	IF140_MOUSE_0	196.198
CAC1H_MOUSE	CAC1H_MOUSE_0	1170.12
CAC1H_MOUSE	CAC1H_MOUSE_1	439.444
CKLF3_MOUSE	CKLF3_MOUSE_0	180.182
SOGA3_MOUSE	SOGA3_MOUSE_0	557.559
SOGA3_MOUSE	SOGA3_MOUSE_1	778.78
PO121_MOUSE	PO121_MOUSE_0	81.82
PO121_MOUSE	PO121_MOUSE_1	254,259,260,262,268,272,274,275,318,321,324,348,351,354,362,365,366,368,369,372,397,403,406,407,408,411,412,415,416,418,420,438,440,445,449
DPOD3_MOUSE	DPOD3_MOUSE_0	402,404,406,408
PARPT_MOUSE	PARPT_MOUSE_0	17.19
F199X_MOUSE	F199X_MOUSE_0	315.32
IRG1_MOUSE	IRG1_MOUSE_0	475.479
ROBO2_MOUSE	ROBO2_MOUSE_0	1156.12
BCL2_MOUSE	BCL2_MOUSE_0	68.69
PDE12_MOUSE	PDE12_MOUSE_0	100.101
EFHD2_MOUSE	EFHD2_MOUSE_0	73,75,82
CT2NL_MOUSE	CT2NL_MOUSE_0	480,483,487,489
CT2NL_MOUSE	CT2NL_MOUSE_1	555,558,561,566,568
TAF6_MOUSE	TAF6_MOUSE_0	625,630,632,633,635,640,641
SAMN1_MOUSE	SAMN1_MOUSE_0	6,9,20,21,22,33,37,40
RL1D1_MOUSE	RL1D1_MOUSE_0	309,319,320,325
RL1D1_MOUSE	RL1D1_MOUSE_1	396,398,406,407
RL1D1_MOUSE	RL1D1_MOUSE_2	3,5,7,9,11,18
ARAP1_MOUSE	ARAP1_MOUSE_0	180,182,192,195
ARAP1_MOUSE	ARAP1_MOUSE_1	730,738,739
ARAP1_MOUSE	ARAP1_MOUSE_2	429,430,432
PPM1J_MOUSE	PPM1J_MOUSE_0	22,24,31,32,40,43
PPM1J_MOUSE	PPM1J_MOUSE_1	201.204
SWAHB_MOUSE	SWAHB_MOUSE_0	131,135,140
SWAHB_MOUSE	SWAHB_MOUSE_1	477,478,479
ENSA_MOUSE	ENSA_MOUSE_0	63,66,69,107,108,112
SF3A3_MOUSE	SF3A3_MOUSE_0	291.294
SF3A3_MOUSE	SF3A3_MOUSE_1	364,366,368
SF3A3_MOUSE	SF3A3_MOUSE_2	474.478
DCA11_MOUSE	DCA11_MOUSE_0	10,20,24
DCA11_MOUSE	DCA11_MOUSE_1	72,74,80
DCA11_MOUSE	DCA11_MOUSE_2	90.97
ZMIZ2_MOUSE	ZMIZ2_MOUSE_0	504.505
PLSL_MOUSE	PLSL_MOUSE_0	4.6
RGS7_MOUSE	RGS7_MOUSE_0	228,238,240,242,244,246,249
MIC25_MOUSE	MIC25_MOUSE_0	30.32
MIC25_MOUSE	MIC25_MOUSE_1	163.165
KCNA1_MOUSE	KCNA1_MOUSE_0	1,4,12,13,22
WDR24_MOUSE	WDR24_MOUSE_0	4.7
WDR24_MOUSE	WDR24_MOUSE_1	580,582,593,597,605
S6OS1_MOUSE	S6OS1_MOUSE_0	426,429,438
S23A3_MOUSE	S23A3_MOUSE_0	600.603
ARFG3_MOUSE	ARFG3_MOUSE_0	239.24
ARFG3_MOUSE	ARFG3_MOUSE_1	325,330,332
ARFG3_MOUSE	ARFG3_MOUSE_2	461.463
WBP11_MOUSE	WBP11_MOUSE_0	235.236
WBP11_MOUSE	WBP11_MOUSE_1	360,363,369
PCNT_MOUSE	PCNT_MOUSE_0	2045.2
PCNT_MOUSE	PCNT_MOUSE_1	1858.19
FA13C_MOUSE	FA13C_MOUSE_0	404,405,409
FNIP2_MOUSE	FNIP2_MOUSE_0	587,591,720,722
ITAV_MOUSE	ITAV_MOUSE_0	1041.1
APBB1_MOUSE	APBB1_MOUSE_0	204.206
NRADD_MOUSE	NRADD_MOUSE_0	218,219,225
MBRL_MOUSE	MBRL_MOUSE_0	548,552,556
RHG32_MOUSE	RHG32_MOUSE_0	654,658,661
RHG32_MOUSE	RHG32_MOUSE_1	702,705,708
RHG32_MOUSE	RHG32_MOUSE_2	847,848,850,851,855
RHG32_MOUSE	RHG32_MOUSE_3	951,953,1173,1175,1178
RHG32_MOUSE	RHG32_MOUSE_4	586,591,593,594
NEST_MOUSE	NEST_MOUSE_0	382,384,388
NEST_MOUSE	NEST_MOUSE_1	477,478,483,484
NEST_MOUSE	NEST_MOUSE_2	812,815,818
NEST_MOUSE	NEST_MOUSE_3	879,882,885
NEST_MOUSE	NEST_MOUSE_4	1113,1116,1126,1129
NEST_MOUSE	NEST_MOUSE_5	1212,1215,1226,1228
NEST_MOUSE	NEST_MOUSE_6	1859.19
NDUB4_MOUSE	NDUB4_MOUSE_0	22,25,28,37
ARHGG_MOUSE	ARHGG_MOUSE_0	229,230,233
ARHGG_MOUSE	ARHGG_MOUSE_1	579.584
ETV1_MOUSE	ETV1_MOUSE_0	138,142,145
HNF1A_MOUSE	HNF1A_MOUSE_0	66,69,73
HNF1A_MOUSE	HNF1A_MOUSE_1	302,303,310,312,314
ALDOA_MOUSE	ALDOA_MOUSE_0	35,36,38
ALDOA_MOUSE	ALDOA_MOUSE_1	359.363
ALDOA_MOUSE	ALDOA_MOUSE_2	48.51
ATP7A_MOUSE	ATP7A_MOUSE_0	1422.14
ATP7A_MOUSE	ATP7A_MOUSE_1	1450,1453,1456,1459,1463,1466,1476
ATP7A_MOUSE	ATP7A_MOUSE_2	345,348,353,355,356,358,360,361
ATP7A_MOUSE	ATP7A_MOUSE_3	257,262,265,269,271
PRUN1_MOUSE	PRUN1_MOUSE_0	391,393,396,399,410,414
PKHO1_MOUSE	PKHO1_MOUSE_0	219,225,232,236,237
PKHO1_MOUSE	PKHO1_MOUSE_1	261.262
OPSD_MOUSE	OPSD_MOUSE_0	333,337,339,341,342
NRDE2_MOUSE	NRDE2_MOUSE_0	63.67
ECHP_MOUSE	ECHP_MOUSE_0	339.34
ECHP_MOUSE	ECHP_MOUSE_1	534,537,542
ECHP_MOUSE	ECHP_MOUSE_2	700,708,714,715
ECHP_MOUSE	ECHP_MOUSE_3	607.609
HNMT_MOUSE	HNMT_MOUSE_0	2.9
FSCN1_MOUSE	FSCN1_MOUSE_0	37.38
RALY_MOUSE	RALY_MOUSE_0	267,269,273,280,291,293,300,303
PGP_MOUSE	PGP_MOUSE_0	66.7
FOXN3_MOUSE	FOXN3_MOUSE_0	82,84,96,100,104
CEP41_MOUSE	CEP41_MOUSE_0	95,98,108,113,120,128,133,134
MYC_MOUSE	MYC_MOUSE_0	57,61,63,70,72
GWL_MOUSE	GWL_MOUSE_0	348.354
SATB1_MOUSE	SATB1_MOUSE_0	634.637
D19L2_MOUSE	D19L2_MOUSE_0	29.32
MOBP_MOUSE	MOBP_MOUSE_0	72.73
MOBP_MOUSE	MOBP_MOUSE_1	115.117
TUT7_MOUSE	TUT7_MOUSE_0	56,60,63
TUT7_MOUSE	TUT7_MOUSE_1	640.644
KIBRA_MOUSE	KIBRA_MOUSE_0	426.433
KIBRA_MOUSE	KIBRA_MOUSE_1	140.143
KIBRA_MOUSE	KIBRA_MOUSE_2	884,886,890,918,920
KIBRA_MOUSE	KIBRA_MOUSE_3	529,532,534
NDEL1_MOUSE	NDEL1_MOUSE_0	193,196,197,199,207,214,218
NDEL1_MOUSE	NDEL1_MOUSE_1	241.244
TPM2_MOUSE	TPM2_MOUSE_0	281.282
TPM2_MOUSE	TPM2_MOUSE_1	59.6
TANC1_MOUSE	TANC1_MOUSE_0	440,442,444,451,457,461
TANC1_MOUSE	TANC1_MOUSE_1	57,59,62,63
TANC1_MOUSE	TANC1_MOUSE_2	1461,1462,1468
TANC1_MOUSE	TANC1_MOUSE_3	1672,1673,1674,1676,1677
TANC1_MOUSE	TANC1_MOUSE_4	203,210,214,220
MYOZ3_MOUSE	MYOZ3_MOUSE_0	172.178
BSCL2_MOUSE	BSCL2_MOUSE_0	143.145
PI3R4_MOUSE	PI3R4_MOUSE_0	852,860,864,893,894,904
SLIK1_MOUSE	SLIK1_MOUSE_0	692.694
CG050_MOUSE	CG050_MOUSE_0	47.51
U520_MOUSE	U520_MOUSE_0	2130,2132,2134
TMTC3_MOUSE	TMTC3_MOUSE_0	856,857,859
PSN2_MOUSE	PSN2_MOUSE_0	17,18,21,24,26,27,29,42,48,51
MS3L1_MOUSE	MS3L1_MOUSE_0	312,314,369,370,395,399,401,402,403,408,410,414
RUSC1_MOUSE	RUSC1_MOUSE_0	260,261,264,266
FARP1_MOUSE	FARP1_MOUSE_0	365,369,370,372,375,388,391,393
FARP1_MOUSE	FARP1_MOUSE_1	874,880,891,896,898,901
FARP1_MOUSE	FARP1_MOUSE_2	8,19,22,23
ARX_MOUSE	ARX_MOUSE_0	17.19
SSH1_MOUSE	SSH1_MOUSE_0	606,607,612
SSH1_MOUSE	SSH1_MOUSE_1	888,890,926,927,928,931,934
GRB14_MOUSE	GRB14_MOUSE_0	363,369,372,379
BICC1_MOUSE	BICC1_MOUSE_0	23,26,31
BICC1_MOUSE	BICC1_MOUSE_1	803.804
BICC1_MOUSE	BICC1_MOUSE_2	634,636,638
RBCC1_MOUSE	RBCC1_MOUSE_0	221,228,236,237,242,251,252,256,260,269,280,283
RBCC1_MOUSE	RBCC1_MOUSE_1	622,627,642,645,648,651
NEK2_MOUSE	NEK2_MOUSE_0	289,293,299
ZFHX3_MOUSE	ZFHX3_MOUSE_0	1598.16
ZFHX3_MOUSE	ZFHX3_MOUSE_1	2899,2903,2907
ZFHX3_MOUSE	ZFHX3_MOUSE_2	425.427
ZFHX3_MOUSE	ZFHX3_MOUSE_3	1187.12
ZFHX3_MOUSE	ZFHX3_MOUSE_4	1513,1515,1517,1519,1528
SGPP1_MOUSE	SGPP1_MOUSE_0	100.102
CLD16_MOUSE	CLD16_MOUSE_0	208.212
CH082_MOUSE	CH082_MOUSE_0	31.32
MYOTI_MOUSE	MYOTI_MOUSE_0	226.23
SULF2_MOUSE	SULF2_MOUSE_0	533.534
SHAN3_MOUSE	SHAN3_MOUSE_0	684,688,693
SHAN3_MOUSE	SHAN3_MOUSE_1	927.929
SHAN3_MOUSE	SHAN3_MOUSE_2	1121,1127,1129,1133
SHAN3_MOUSE	SHAN3_MOUSE_3	1158,1162,1165
SHAN3_MOUSE	SHAN3_MOUSE_4	1537.15
SHAN3_MOUSE	SHAN3_MOUSE_5	1633,1635,1637,1639
SHAN3_MOUSE	SHAN3_MOUSE_6	365,372,374,386,390,393
SHAN3_MOUSE	SHAN3_MOUSE_7	553.554
KPCL_MOUSE	KPCL_MOUSE_0	316,318,319,325
NHRF3_MOUSE	NHRF3_MOUSE_0	487,488,491,502,504,507,509,510,511,513
NHRF3_MOUSE	NHRF3_MOUSE_1	362.364
TE2IP_MOUSE	TE2IP_MOUSE_0	191,199,201,202
TE2IP_MOUSE	TE2IP_MOUSE_1	150.152
PTC1_MOUSE	PTC1_MOUSE_0	1180.12
S6A17_MOUSE	S6A17_MOUSE_0	681,685,689,699,700,712,714,716,720,721,724
S6A17_MOUSE	S6A17_MOUSE_1	12,17,19,32,35
T2FA_MOUSE	T2FA_MOUSE_0	216,217,220,223,304,306,307,310
T2FA_MOUSE	T2FA_MOUSE_1	376,379,380,383,384,388,390,426,432,435,436,438,439
EHMT2_MOUSE	EHMT2_MOUSE_0	40.43
EHMT2_MOUSE	EHMT2_MOUSE_1	185,187,192,195,284,286,288,293
EHMT2_MOUSE	EHMT2_MOUSE_2	464,465,468
GDIR2_MOUSE	GDIR2_MOUSE_0	18.22
PNMT_MOUSE	PNMT_MOUSE_0	4,10,12,14
PCDH8_MOUSE	PCDH8_MOUSE_0	797.801
PCDH8_MOUSE	PCDH8_MOUSE_1	1050,1052,1056
ZNT1_MOUSE	ZNT1_MOUSE_0	460.462
TAF9_MOUSE	TAF9_MOUSE_0	143,148,151,154,157,158,160,163,168,177
HTRA2_MOUSE	HTRA2_MOUSE_0	140.141
BAP1_MOUSE	BAP1_MOUSE_0	605.607
BAP1_MOUSE	BAP1_MOUSE_1	275,278,284,288,291
BAP1_MOUSE	BAP1_MOUSE_2	511,515,518,519
RGMC_MOUSE	RGMC_MOUSE_0	42.44
TBX3_MOUSE	TBX3_MOUSE_0	368.372
TBX3_MOUSE	TBX3_MOUSE_1	700,702,704
TSYL4_MOUSE	TSYL4_MOUSE_0	86.88
APCL_MOUSE	APCL_MOUSE_0	1562,1564,1631,1634
APCL_MOUSE	APCL_MOUSE_1	2141.21
APCL_MOUSE	APCL_MOUSE_2	103,107,112
APCL_MOUSE	APCL_MOUSE_3	1036.1
ZIC4_MOUSE	ZIC4_MOUSE_0	314.316
SIGIR_MOUSE	SIGIR_MOUSE_0	366,371,378,381
RHG23_MOUSE	RHG23_MOUSE_0	313.315
RHG23_MOUSE	RHG23_MOUSE_1	358.36
RHG23_MOUSE	RHG23_MOUSE_2	616,618,625,638,642,651,654,657
RHG23_MOUSE	RHG23_MOUSE_3	1182,1183,1184,1188
RHG23_MOUSE	RHG23_MOUSE_4	1294,1296,1297
GRD2I_MOUSE	GRD2I_MOUSE_0	349,353,356,358
GRD2I_MOUSE	GRD2I_MOUSE_1	607,612,614,615
GRD2I_MOUSE	GRD2I_MOUSE_2	814.817
DDX41_MOUSE	DDX41_MOUSE_0	16,20,22
DDX41_MOUSE	DDX41_MOUSE_1	65.67
MFA1B_MOUSE	MFA1B_MOUSE_0	51.52
MFA1B_MOUSE	MFA1B_MOUSE_1	131.132
EFCB5_MOUSE	EFCB5_MOUSE_0	452,458,460,466
DEAF1_MOUSE	DEAF1_MOUSE_0	171,176,179
DEAF1_MOUSE	DEAF1_MOUSE_1	432,434,438,440
DEAF1_MOUSE	DEAF1_MOUSE_2	217.221
HELQ_MOUSE	HELQ_MOUSE_0	27,29,39
AGRG2_MOUSE	AGRG2_MOUSE_0	924.925
TERF2_MOUSE	TERF2_MOUSE_0	363,365,366,398,403,411,413,414,417,422,423,428
RBM10_MOUSE	RBM10_MOUSE_0	88.9
RBM10_MOUSE	RBM10_MOUSE_1	708,709,717,722,731,732,735,737
CLC2D_MOUSE	CLC2D_MOUSE_0	6,11,13,15
PAK4_MOUSE	PAK4_MOUSE_0	92,98,103
TALDO_MOUSE	TALDO_MOUSE_0	204.205
TM245_MOUSE	TM245_MOUSE_0	322,323,325,326,328,330
TM245_MOUSE	TM245_MOUSE_1	11,15,20
MAFK_MOUSE	MAFK_MOUSE_0	126.128
ZDH20_MOUSE	ZDH20_MOUSE_0	319,326,329,342,344
GRDN_MOUSE	GRDN_MOUSE_0	1416,1418,1420
GRDN_MOUSE	GRDN_MOUSE_1	1560,1561,1566,1583,1587,1590,1593,1616,1620,1623
GRDN_MOUSE	GRDN_MOUSE_2	1701,1702,1703,1716,1718,1719
GRDN_MOUSE	GRDN_MOUSE_3	1800,1802,1808,1820,1821
GRDN_MOUSE	GRDN_MOUSE_4	232.236
GRDN_MOUSE	GRDN_MOUSE_5	480,481,490
TGRM2_MOUSE	TGRM2_MOUSE_0	291.294
KS6A5_MOUSE	KS6A5_MOUSE_0	813,814,815
KS6A5_MOUSE	KS6A5_MOUSE_1	754,757,758
MYO10_MOUSE	MYO10_MOUSE_0	960,963,1126,1127,1130,1131,1133,1134,1137
AAGAB_MOUSE	AAGAB_MOUSE_0	210.212
AAGAB_MOUSE	AAGAB_MOUSE_1	310.311
LYSM1_MOUSE	LYSM1_MOUSE_0	161,164,166,191,192
LYSM1_MOUSE	LYSM1_MOUSE_1	22.23
ANLN_MOUSE	ANLN_MOUSE_0	785,786,789
ANLN_MOUSE	ANLN_MOUSE_1	179,181,186,191
ANLN_MOUSE	ANLN_MOUSE_2	291,292,295,317,321,331,333
ANLN_MOUSE	ANLN_MOUSE_3	391,395,398
ANLN_MOUSE	ANLN_MOUSE_4	509,511,512
ANLN_MOUSE	ANLN_MOUSE_5	652,655,658,665,672,682
GRM1_MOUSE	GRM1_MOUSE_0	962,968,971,972
GRM1_MOUSE	GRM1_MOUSE_1	1106,1107,1142,1146,1150,1153,1164,1167,1168,1177
KSR1_MOUSE	KSR1_MOUSE_0	252,255,258,259
KSR1_MOUSE	KSR1_MOUSE_1	294.296
KSR1_MOUSE	KSR1_MOUSE_2	389,391,394
KSR1_MOUSE	KSR1_MOUSE_3	548.549
FNIP1_MOUSE	FNIP1_MOUSE_0	757,759,762
FNIP1_MOUSE	FNIP1_MOUSE_1	936,939,944,946
FNIP1_MOUSE	FNIP1_MOUSE_2	219,229,231,253,258,260
FNIP1_MOUSE	FNIP1_MOUSE_3	291,293,295
FNIP1_MOUSE	FNIP1_MOUSE_4	592.593
PIGM_MOUSE	PIGM_MOUSE_0	140.141
CDHR5_MOUSE	CDHR5_MOUSE_0	720,724,727
NOVA1_MOUSE	NOVA1_MOUSE_0	366.371
NOVA1_MOUSE	NOVA1_MOUSE_1	152.153
KNOP1_MOUSE	KNOP1_MOUSE_0	50,55,56,58
KNOP1_MOUSE	KNOP1_MOUSE_1	311.313
AKNA_MOUSE	AKNA_MOUSE_0	519,521,523
AKNA_MOUSE	AKNA_MOUSE_1	835.837
AKNA_MOUSE	AKNA_MOUSE_2	1011,1014,1018,1143,1144
AKNA_MOUSE	AKNA_MOUSE_3	1386,1388,1396,1400
MTG8_MOUSE	MTG8_MOUSE_0	19.21
MTG8_MOUSE	MTG8_MOUSE_1	564,567,569
SMRC2_MOUSE	SMRC2_MOUSE_0	805,809,812
SMRC2_MOUSE	SMRC2_MOUSE_1	272,282,285,301,303,305,307,321,323
IFIX_MOUSE	IFIX_MOUSE_0	110,115,124,127,128,131,151,153,175,178
EGFL6_MOUSE	EGFL6_MOUSE_0	313.314
C2D1B_MOUSE	C2D1B_MOUSE_0	483,485,498,501
C2D1B_MOUSE	C2D1B_MOUSE_1	582.585
EPHB3_MOUSE	EPHB3_MOUSE_0	587.588
ZN583_MOUSE	ZN583_MOUSE_0	556.557
ELF5_MOUSE	ELF5_MOUSE_0	144,148,153
SPC25_MOUSE	SPC25_MOUSE_0	59.65
PRP4B_MOUSE	PRP4B_MOUSE_0	20,23,32,36
PRP4B_MOUSE	PRP4B_MOUSE_1	140,142,144,164,165,166,167
PRP4B_MOUSE	PRP4B_MOUSE_2	239.241
PRP4B_MOUSE	PRP4B_MOUSE_3	291,293,327,329,334,340,353,355,365,367,380,382,384,386,393,395,409,410,426,430,436,438,442,444,450,452,457,459,464,466
PRP4B_MOUSE	PRP4B_MOUSE_4	517,518,519
PRP4B_MOUSE	PRP4B_MOUSE_5	575,577,579
RFX5_MOUSE	RFX5_MOUSE_0	181.183
RFX5_MOUSE	RFX5_MOUSE_1	524,534,537
BAZ1B_MOUSE	BAZ1B_MOUSE_0	311,317,324,325,326,329
BAZ1B_MOUSE	BAZ1B_MOUSE_1	358.36
BAZ1B_MOUSE	BAZ1B_MOUSE_2	456,457,464
BAZ1B_MOUSE	BAZ1B_MOUSE_3	151,157,159,160,165
BAZ1B_MOUSE	BAZ1B_MOUSE_4	705,708,710,716,717
BAZ1B_MOUSE	BAZ1B_MOUSE_5	1463,1465,1467
BCAS1_MOUSE	BCAS1_MOUSE_0	327.329
BCAS1_MOUSE	BCAS1_MOUSE_1	522.524
WASF3_MOUSE	WASF3_MOUSE_0	228,229,232,234
PUM1_MOUSE	PUM1_MOUSE_0	709,711,713,799,800,806,808
PUM1_MOUSE	PUM1_MOUSE_1	201,205,208,211
UN13C_MOUSE	UN13C_MOUSE_0	445.449
UN13C_MOUSE	UN13C_MOUSE_1	635,637,640
UN13C_MOUSE	UN13C_MOUSE_2	162.163
CEBPB_MOUSE	CEBPB_MOUSE_0	107,109,168,173,175,178,180,181,182,183,187,189
CEBPB_MOUSE	CEBPB_MOUSE_1	271.275
RAF1_MOUSE	RAF1_MOUSE_0	496.498
RAF1_MOUSE	RAF1_MOUSE_1	219,226,232,233,241,243,257,258,288,290,293,294,295,300,302,305,309,337,338
RAF1_MOUSE	RAF1_MOUSE_2	611,618,620,623
MY18A_MOUSE	MY18A_MOUSE_0	721,726,727
MY18A_MOUSE	MY18A_MOUSE_1	1989,1993,1997,2000,2001,2002,2004,2005,2015,2024,2026,2031,2033,2036,2038,2040
MY18A_MOUSE	MY18A_MOUSE_2	71,73,78,82,84,97,98,100,101,102,125,131,139,144,148,152,156,159,163
MY18A_MOUSE	MY18A_MOUSE_3	980.982
ACE_MOUSE	ACE_MOUSE_0	1304.13
CCSAP_MOUSE	CCSAP_MOUSE_0	60.64
CCSAP_MOUSE	CCSAP_MOUSE_1	188.19
TLK2_MOUSE	TLK2_MOUSE_0	34,37,40,43,45,51
ECD_MOUSE	ECD_MOUSE_0	502.504
SNP25_MOUSE	SNP25_MOUSE_0	24,27,28,38
NCHL1_MOUSE	NCHL1_MOUSE_0	1196.12
NCHL1_MOUSE	NCHL1_MOUSE_1	1127,1132,1137,1139,1147,1150,1158,1160,1163,1167,1173,1180
FYV1_MOUSE	FYV1_MOUSE_0	490.492
FYV1_MOUSE	FYV1_MOUSE_1	298,304,306,308,311,317
FYV1_MOUSE	FYV1_MOUSE_2	1520,1524,1541,1542,1547
FYV1_MOUSE	FYV1_MOUSE_3	19.22
BAP18_MOUSE	BAP18_MOUSE_0	95,105,109
MAP6_MOUSE	MAP6_MOUSE_0	107,108,138,140
P3C2A_MOUSE	P3C2A_MOUSE_0	48.5
P3C2A_MOUSE	P3C2A_MOUSE_1	1068.11
SBDS_MOUSE	SBDS_MOUSE_0	232.237
CTBP2_MOUSE	CTBP2_MOUSE_0	423,427,432
GPAT4_MOUSE	GPAT4_MOUSE_0	100.106
CNKR2_MOUSE	CNKR2_MOUSE_0	682,684,686
CNKR2_MOUSE	CNKR2_MOUSE_1	324,335,337,338,387,389
CNKR2_MOUSE	CNKR2_MOUSE_2	429,430,432
KCNQ2_MOUSE	KCNQ2_MOUSE_0	678,680,684
KCNQ2_MOUSE	KCNQ2_MOUSE_1	428,437,439,443,447,449
KCNQ2_MOUSE	KCNQ2_MOUSE_2	478.482
SPR1A_MOUSE	SPR1A_MOUSE_0	134.136
EXOC7_MOUSE	EXOC7_MOUSE_0	240,241,242,244,249
UCK1_MOUSE	UCK1_MOUSE_0	267.271
RHG12_MOUSE	RHG12_MOUSE_0	100.101
RHG12_MOUSE	RHG12_MOUSE_1	195,198,203,210,212,227,228,237,240
RHG12_MOUSE	RHG12_MOUSE_2	400,402,419,420
RHG12_MOUSE	RHG12_MOUSE_3	580.583
RHG12_MOUSE	RHG12_MOUSE_4	351.355
PACS1_MOUSE	PACS1_MOUSE_0	776.778
PACS1_MOUSE	PACS1_MOUSE_1	373,376,378
PACS1_MOUSE	PACS1_MOUSE_2	407,408,410,420,425,426,427
PACS1_MOUSE	PACS1_MOUSE_3	490,492,494,501,508,516,520,523,525,526,528,531
PACS1_MOUSE	PACS1_MOUSE_4	316.317
PAR14_MOUSE	PAR14_MOUSE_0	101.105
ILDR1_MOUSE	ILDR1_MOUSE_0	489.491
FA20C_MOUSE	FA20C_MOUSE_0	575.576
POPD1_MOUSE	POPD1_MOUSE_0	294,297,314,317,322
INHBE_MOUSE	INHBE_MOUSE_0	57.58
PROX1_MOUSE	PROX1_MOUSE_0	176,178,180,196,198,290,294
PROX1_MOUSE	PROX1_MOUSE_1	528.529
PROX1_MOUSE	PROX1_MOUSE_2	568,570,573
TM117_MOUSE	TM117_MOUSE_0	452.455
TM117_MOUSE	TM117_MOUSE_1	484.488
AFTIN_MOUSE	AFTIN_MOUSE_0	678.679
CERS2_MOUSE	CERS2_MOUSE_0	340,345,347,348,353
CN093_MOUSE	CN093_MOUSE_0	423.428
CN093_MOUSE	CN093_MOUSE_1	113.117
GGT7_MOUSE	GGT7_MOUSE_0	71,72,73,74,78,82
SRSF2_MOUSE	SRSF2_MOUSE_0	21,22,24,25
SRSF2_MOUSE	SRSF2_MOUSE_1	91,97,100,118,120,141,144,146,186,188,190,195,201,203,205,207,211,219,220
SCIMP_MOUSE	SCIMP_MOUSE_0	63.64
ADRB1_MOUSE	ADRB1_MOUSE_0	449.45
MYOF_MOUSE	MYOF_MOUSE_0	169,171,173
KCNC1_MOUSE	KCNC1_MOUSE_0	157.159
KCNC1_MOUSE	KCNC1_MOUSE_1	467,470,473,477,481,482,484,486
ANR11_MOUSE	ANR11_MOUSE_0	338,340,407,409,410
ANR11_MOUSE	ANR11_MOUSE_1	1798,1804,1807,1831,1834,1835,1836
ZC12C_MOUSE	ZC12C_MOUSE_0	20.25
PLM_MOUSE	PLM_MOUSE_0	78,81,82,87,88
DCK_MOUSE	DCK_MOUSE_0	72.73
DCK_MOUSE	DCK_MOUSE_1	10,12,13,14,15
FA57B_MOUSE	FA57B_MOUSE_0	264.268
GARE1_MOUSE	GARE1_MOUSE_0	608,612,614,620,623,628
GARE1_MOUSE	GARE1_MOUSE_1	737.741
AAAT_MOUSE	AAAT_MOUSE_0	500,504,505
AAAT_MOUSE	AAAT_MOUSE_1	542.545
CXCR4_MOUSE	CXCR4_MOUSE_0	325,327,330,331,344,345,347,352,353,354,358
HERC2_MOUSE	HERC2_MOUSE_0	1938,1942,1944,1948
FA50B_MOUSE	FA50B_MOUSE_0	138,143,158,159
CB081_MOUSE	CB081_MOUSE_0	236.237
EMAL4_MOUSE	EMAL4_MOUSE_0	133,137,143,145,149
EMAL4_MOUSE	EMAL4_MOUSE_1	897,898,905,907
DNMBP_MOUSE	DNMBP_MOUSE_0	1578.16
DNMBP_MOUSE	DNMBP_MOUSE_1	380,382,383
DNMBP_MOUSE	DNMBP_MOUSE_2	682,686,691
DTL_MOUSE	DTL_MOUSE_0	190.195
DTL_MOUSE	DTL_MOUSE_1	424,427,437,439,442
DTL_MOUSE	DTL_MOUSE_2	483,485,486,488,506,508,510,514,555,556
DTL_MOUSE	DTL_MOUSE_3	617,621,624,653,654,673,677,679,692,693,700,715,721,725
SETBP_MOUSE	SETBP_MOUSE_0	675.676
SMTN_MOUSE	SMTN_MOUSE_0	438.439
SMTN_MOUSE	SMTN_MOUSE_1	573,576,581
PPM1G_MOUSE	PPM1G_MOUSE_0	198.2
PPM1G_MOUSE	PPM1G_MOUSE_1	523.524
DMWD_MOUSE	DMWD_MOUSE_0	450,452,460,464,467,484,486,500,502
DMWD_MOUSE	DMWD_MOUSE_1	642.646
DDX50_MOUSE	DDX50_MOUSE_0	34,38,84,86,110,111
S35A5_MOUSE	S35A5_MOUSE_0	406,413,414,428,431,435
CAMLG_MOUSE	CAMLG_MOUSE_0	52.54
REEP1_MOUSE	REEP1_MOUSE_0	149.151
TET1_MOUSE	TET1_MOUSE_0	555.56
TET1_MOUSE	TET1_MOUSE_1	733.735
TET1_MOUSE	TET1_MOUSE_2	9.11
ERC2_MOUSE	ERC2_MOUSE_0	8,13,17
TULP2_MOUSE	TULP2_MOUSE_0	210.212
TULP2_MOUSE	TULP2_MOUSE_1	151,152,154
INCE_MOUSE	INCE_MOUSE_0	268,269,272
INCE_MOUSE	INCE_MOUSE_1	451.453
INCE_MOUSE	INCE_MOUSE_2	795,798,799,803
INCE_MOUSE	INCE_MOUSE_3	134,137,140,143,146,148,151
INCE_MOUSE	INCE_MOUSE_4	176,180,189,194,198,207,210,214,217,238,244,247,248,250
INCE_MOUSE	INCE_MOUSE_5	859,860,861,866
EPN3_MOUSE	EPN3_MOUSE_0	174,176,177,178,183,184
EPN3_MOUSE	EPN3_MOUSE_1	385,386,388
ZN703_MOUSE	ZN703_MOUSE_0	300.302
NMT2_MOUSE	NMT2_MOUSE_0	60,63,65,67,69
AT1A1_MOUSE	AT1A1_MOUSE_0	216,218,221,225,227
AT1A1_MOUSE	AT1A1_MOUSE_1	54,56,59
CLIP4_MOUSE	CLIP4_MOUSE_0	605,607,608
VPS72_MOUSE	VPS72_MOUSE_0	85.88
KCD15_MOUSE	KCD15_MOUSE_0	34.37
OSTF1_MOUSE	OSTF1_MOUSE_0	200.202
MYOZ2_MOUSE	MYOZ2_MOUSE_0	94,100,105,106,110,115
MYOZ2_MOUSE	MYOZ2_MOUSE_1	2.4
TYB4_MOUSE	TYB4_MOUSE_0	21,26,28,36,39,49
F135B_MOUSE	F135B_MOUSE_0	676,678,774,775
F135B_MOUSE	F135B_MOUSE_1	528,530,538
ATAD1_MOUSE	ATAD1_MOUSE_0	316,317,318,321
ZEB1_MOUSE	ZEB1_MOUSE_0	292,296,298,301,303
ZEB1_MOUSE	ZEB1_MOUSE_1	30.32
ZEB1_MOUSE	ZEB1_MOUSE_2	677,679,680,681,683
MMGT1_MOUSE	MMGT1_MOUSE_0	116,118,119,127
SPP24_MOUSE	SPP24_MOUSE_0	161,164,166
ZKSC1_MOUSE	ZKSC1_MOUSE_0	9.12
UBR5_MOUSE	UBR5_MOUSE_0	2021.2
UBR5_MOUSE	UBR5_MOUSE_1	2475.25
SHIP2_MOUSE	SHIP2_MOUSE_0	240.244
SHIP2_MOUSE	SHIP2_MOUSE_1	146,147,148,157,161,167
SHIP2_MOUSE	SHIP2_MOUSE_2	986.987
ATLA1_MOUSE	ATLA1_MOUSE_0	9,14,17,18,21,22
C5AR1_MOUSE	C5AR1_MOUSE_0	324,327,332
AT8A2_MOUSE	AT8A2_MOUSE_0	420.421
AT8A2_MOUSE	AT8A2_MOUSE_1	4.5
AT8A2_MOUSE	AT8A2_MOUSE_2	1139.11
MON1A_MOUSE	MON1A_MOUSE_0	9,10,30,32,55,56,60,68,71
MON1A_MOUSE	MON1A_MOUSE_1	139.14
SH3R1_MOUSE	SH3R1_MOUSE_0	729,732,740,744,746
DSC1_MOUSE	DSC1_MOUSE_0	779,788,791
ABR_MOUSE	ABR_MOUSE_0	635.637
ABR_MOUSE	ABR_MOUSE_1	52,56,63,69,71,73
RB3GP_MOUSE	RB3GP_MOUSE_0	534,535,537,539,573,578,580
PARVA_MOUSE	PARVA_MOUSE_0	2,3,7,13,15,18,21,27
KCNQ1_MOUSE	KCNQ1_MOUSE_0	405,407,455,461,462,468
PPRC1_MOUSE	PPRC1_MOUSE_0	1097.11
PPRC1_MOUSE	PPRC1_MOUSE_1	1439.14
CP4CA_MOUSE	CP4CA_MOUSE_0	391.392
TMOD2_MOUSE	TMOD2_MOUSE_0	126.128
MSI1H_MOUSE	MSI1H_MOUSE_0	11.14
NACAM_MOUSE	NACAM_MOUSE_0	556,559,564,573,576,581
NACAM_MOUSE	NACAM_MOUSE_1	789,793,797,799
NACAM_MOUSE	NACAM_MOUSE_2	1162,1168,1173,1176
NACAM_MOUSE	NACAM_MOUSE_3	1211,1212,1214
NACAM_MOUSE	NACAM_MOUSE_4	1300.13
NACAM_MOUSE	NACAM_MOUSE_5	1391,1397,1399
NACAM_MOUSE	NACAM_MOUSE_6	1475,1477,1488,1491
NACAM_MOUSE	NACAM_MOUSE_7	1683,1685,1691,1694
NACAM_MOUSE	NACAM_MOUSE_8	1743.17
NACAM_MOUSE	NACAM_MOUSE_9	2122,2128,2130,2132,2137,2145
IKBA_MOUSE	IKBA_MOUSE_0	31,35,41
TAF6L_MOUSE	TAF6L_MOUSE_0	512.514
STK33_MOUSE	STK33_MOUSE_0	61.62
STK33_MOUSE	STK33_MOUSE_1	402,408,415
STK33_MOUSE	STK33_MOUSE_2	148.149
SYEP_MOUSE	SYEP_MOUSE_0	941.943
ENV2_MOUSE	ENV2_MOUSE_0	123.125
DGLA_MOUSE	DGLA_MOUSE_0	725,727,729,732
DGLA_MOUSE	DGLA_MOUSE_1	783,785,803,807,809
DGLA_MOUSE	DGLA_MOUSE_2	953.955
OPN4_MOUSE	OPN4_MOUSE_0	380.383
PPME1_MOUSE	PPME1_MOUSE_0	6,14,21,26
PPME1_MOUSE	PPME1_MOUSE_1	242.246
FERM2_MOUSE	FERM2_MOUSE_0	176,178,180,184
FERM2_MOUSE	FERM2_MOUSE_1	331.338
FERM2_MOUSE	FERM2_MOUSE_2	408.415
KCMA1_MOUSE	KCMA1_MOUSE_0	915,922,923,927,937
KCMA1_MOUSE	KCMA1_MOUSE_1	708,710,723,727
RL19_MOUSE	RL19_MOUSE_0	11.12
KCNF1_MOUSE	KCNF1_MOUSE_0	469.471
PSIP1_MOUSE	PSIP1_MOUSE_0	93,101,104,105,114,117,121,128,133,139,140
PSIP1_MOUSE	PSIP1_MOUSE_1	165,168,170,175
PSIP1_MOUSE	PSIP1_MOUSE_2	268,269,270,271,273
MAP9_MOUSE	MAP9_MOUSE_0	255.256
IFIXL_MOUSE	IFIXL_MOUSE_0	124,127,128,131,151,153
AT1A2_MOUSE	AT1A2_MOUSE_0	214,216,219,223,225
AT1A2_MOUSE	AT1A2_MOUSE_1	670.671
AT1A2_MOUSE	AT1A2_MOUSE_2	438,440,449
ST65G_MOUSE	ST65G_MOUSE_0	101.105
RECQ5_MOUSE	RECQ5_MOUSE_0	1,6,7
RECQ5_MOUSE	RECQ5_MOUSE_1	488.491
EMAL1_MOUSE	EMAL1_MOUSE_0	133,134,138,145,146,152,156,158,159,160,161,163
ZBED3_MOUSE	ZBED3_MOUSE_0	110.112
S23IP_MOUSE	S23IP_MOUSE_0	734,736,737,747
S23IP_MOUSE	S23IP_MOUSE_1	599.602
WWOX_MOUSE	WWOX_MOUSE_0	11.13
C43BP_MOUSE	C43BP_MOUSE_0	118,122,124,125,131,134,140,149
C43BP_MOUSE	C43BP_MOUSE_1	371,372,374,376,378,379,386
SH3G1_MOUSE	SH3G1_MOUSE_0	285,286,287
AR6P4_MOUSE	AR6P4_MOUSE_0	49.51
CD158_MOUSE	CD158_MOUSE_0	137.141
CD158_MOUSE	CD158_MOUSE_1	470.471
CAN9_MOUSE	CAN9_MOUSE_0	2.6
STA5B_MOUSE	STA5B_MOUSE_0	127.131
LMTK2_MOUSE	LMTK2_MOUSE_0	1075.11
LMTK2_MOUSE	LMTK2_MOUSE_1	1273,1275,1276,1278
LMTK2_MOUSE	LMTK2_MOUSE_2	609,614,620
LMTK2_MOUSE	LMTK2_MOUSE_3	780,782,783,787,796,798
LMTK2_MOUSE	LMTK2_MOUSE_4	1412,1413,1415,1417
LMTK2_MOUSE	LMTK2_MOUSE_5	1463.15
GDIA_MOUSE	GDIA_MOUSE_0	37,42,43,44
MARH1_MOUSE	MARH1_MOUSE_0	55.56
TMC7_MOUSE	TMC7_MOUSE_0	121.124
BIN1_MOUSE	BIN1_MOUSE_0	295,297,303,307,323,327,331,333,348,350
GABPA_MOUSE	GABPA_MOUSE_0	298.302
CCD86_MOUSE	CCD86_MOUSE_0	251.252
EMAL3_MOUSE	EMAL3_MOUSE_0	156,157,160,176,177,184,197,198,207
EMAL3_MOUSE	EMAL3_MOUSE_1	874,881,887,889,893
PKHA7_MOUSE	PKHA7_MOUSE_0	327,331,357,361,363
PKHA7_MOUSE	PKHA7_MOUSE_1	466,468,477,480,481
PKHA7_MOUSE	PKHA7_MOUSE_2	532.534
PKHA7_MOUSE	PKHA7_MOUSE_3	600,604,608
PKHA7_MOUSE	PKHA7_MOUSE_4	863,866,867
PKHA7_MOUSE	PKHA7_MOUSE_5	1090.11
PKHA7_MOUSE	PKHA7_MOUSE_6	116,121,122,123
SC6A9_MOUSE	SC6A9_MOUSE_0	656,658,680,683,684,689
STXB1_MOUSE	STXB1_MOUSE_0	500,505,506,508,510,511
STXB1_MOUSE	STXB1_MOUSE_1	587,592,593
STXB1_MOUSE	STXB1_MOUSE_2	344.345
MRCKG_MOUSE	MRCKG_MOUSE_0	469.471
MRCKG_MOUSE	MRCKG_MOUSE_1	1513.15
NU107_MOUSE	NU107_MOUSE_0	3,9,10
NU107_MOUSE	NU107_MOUSE_1	45,48,54,57,64,66,67,82,86
NRIP1_MOUSE	NRIP1_MOUSE_0	803,807,862,863
NRIP1_MOUSE	NRIP1_MOUSE_1	101.103
NECA1_MOUSE	NECA1_MOUSE_0	191.196
NECA1_MOUSE	NECA1_MOUSE_1	9,10,13
FRM4A_MOUSE	FRM4A_MOUSE_0	877,881,886,888,973,974,977,986,987
FRM4A_MOUSE	FRM4A_MOUSE_1	584,589,597,599,600,605,619,625,626,628,630,641,651,654,658,665,674,678,693,694,695,698
FRM4A_MOUSE	FRM4A_MOUSE_2	779,781,782,784
H2B1C_MOUSE	H2B1C_MOUSE_0	87.88
H2B1C_MOUSE	H2B1C_MOUSE_1	36,37,38,40
H2B1C_MOUSE	H2B1C_MOUSE_2	112,115,119,122
PTN18_MOUSE	PTN18_MOUSE_0	380.381
MYOZ1_MOUSE	MYOZ1_MOUSE_0	79,81,82
MYOZ1_MOUSE	MYOZ1_MOUSE_1	14.15
SRSF5_MOUSE	SRSF5_MOUSE_0	115.116
SRSF5_MOUSE	SRSF5_MOUSE_1	210,211,213,223,225,227,229,241,244,246,249,259,261,263,266
RGL1_MOUSE	RGL1_MOUSE_0	519.525
CYTSB_MOUSE	CYTSB_MOUSE_0	37,38,39,53,54,57,75,77,81
CYTSB_MOUSE	CYTSB_MOUSE_1	131,132,134,135,136,140,142
CYTSB_MOUSE	CYTSB_MOUSE_2	321,323,327,333,336,338,342,344,345,350,351,354,356,358,359,364,367
CYTSB_MOUSE	CYTSB_MOUSE_3	913.916
KPCD1_MOUSE	KPCD1_MOUSE_0	400,402,404,405,406
KPCD1_MOUSE	KPCD1_MOUSE_1	202,205,211
KPCD1_MOUSE	KPCD1_MOUSE_2	252.254
RRAGC_MOUSE	RRAGC_MOUSE_0	1,9,14,15,20
RRAGC_MOUSE	RRAGC_MOUSE_1	376,379,380,383,392
PTPRN_MOUSE	PTPRN_MOUSE_0	306.307
PHAG1_MOUSE	PHAG1_MOUSE_0	164,170,171,172
PHAG1_MOUSE	PHAG1_MOUSE_1	223.225
PHAG1_MOUSE	PHAG1_MOUSE_2	283,287,291,292,294
PHAG1_MOUSE	PHAG1_MOUSE_3	347,349,350,355,357
PHAG1_MOUSE	PHAG1_MOUSE_4	411,413,415
CO1A2_MOUSE	CO1A2_MOUSE_0	598.602
LMNA_MOUSE	LMNA_MOUSE_0	545,547,569,572,574
LMNA_MOUSE	LMNA_MOUSE_1	610,616,619,628,632,636,643,645,646,651,652
LMNA_MOUSE	LMNA_MOUSE_2	2,4,9,11,16,17,18,21,23,26
LMNA_MOUSE	LMNA_MOUSE_3	300,302,306
LMNA_MOUSE	LMNA_MOUSE_4	389,391,393,394,397,402,403,405,406,408,413,415,422,423,425,427,428
KIT_MOUSE	KIT_MOUSE_0	719,722,730,731,747,748
PKHH2_MOUSE	PKHH2_MOUSE_0	181,189,195,199
PKHH2_MOUSE	PKHH2_MOUSE_1	619,620,622
MLF2_MOUSE	MLF2_MOUSE_0	142,144,150
MLF2_MOUSE	MLF2_MOUSE_1	236,238,241
MED24_MOUSE	MED24_MOUSE_0	859,860,861,869,870,872
SZRD1_MOUSE	SZRD1_MOUSE_0	33,36,38,50,53
SZRD1_MOUSE	SZRD1_MOUSE_1	104.106
CLSPN_MOUSE	CLSPN_MOUSE_0	698,700,701
CLSPN_MOUSE	CLSPN_MOUSE_1	779,784,786
CLSPN_MOUSE	CLSPN_MOUSE_2	64.66
CLSPN_MOUSE	CLSPN_MOUSE_3	108,111,118
CLSPN_MOUSE	CLSPN_MOUSE_4	1264,1266,1289,1291,1300
CLSPN_MOUSE	CLSPN_MOUSE_5	416.423
TMA16_MOUSE	TMA16_MOUSE_0	203,205,206,208,218
SBNO1_MOUSE	SBNO1_MOUSE_0	689,690,694,750,751,764,765
CE128_MOUSE	CE128_MOUSE_0	102,106,107,109,111
F149A_MOUSE	F149A_MOUSE_0	554,555,558,559
ACLY_MOUSE	ACLY_MOUSE_0	446,452,454,456,458
KTDAP_MOUSE	KTDAP_MOUSE_0	41.43
CD19_MOUSE	CD19_MOUSE_0	520.521
GARL3_MOUSE	GARL3_MOUSE_0	446,448,454
GARL3_MOUSE	GARL3_MOUSE_1	846,847,850,856
GARL3_MOUSE	GARL3_MOUSE_2	1028.1
TM45B_MOUSE	TM45B_MOUSE_0	272.274
CY561_MOUSE	CY561_MOUSE_0	239,241,245,247
UFL1_MOUSE	UFL1_MOUSE_0	751,752,787,788
UFL1_MOUSE	UFL1_MOUSE_1	457.461
CTR9_MOUSE	CTR9_MOUSE_0	924,931,940,942
CTR9_MOUSE	CTR9_MOUSE_1	1014,1015,1016,1019,1020,1036,1038,1040
CTR9_MOUSE	CTR9_MOUSE_2	1065,1069,1078,1082,1084
CTR9_MOUSE	CTR9_MOUSE_3	1120,1124,1129
F219B_MOUSE	F219B_MOUSE_0	121,124,126
ITFG2_MOUSE	ITFG2_MOUSE_0	216.218
DGLB_MOUSE	DGLB_MOUSE_0	569,574,575,577,581
APOC2_MOUSE	APOC2_MOUSE_0	27.29
LPAR1_MOUSE	LPAR1_MOUSE_0	340,343,345,346,350,357
PLPL7_MOUSE	PLPL7_MOUSE_0	1279.13
PLPL7_MOUSE	PLPL7_MOUSE_1	340.341
PAK2_MOUSE	PAK2_MOUSE_0	138,140,142,151,153,158,161
PAK2_MOUSE	PAK2_MOUSE_1	191,194,196
PAK2_MOUSE	PAK2_MOUSE_2	400.401
PAK2_MOUSE	PAK2_MOUSE_3	19.2
PAK2_MOUSE	PAK2_MOUSE_4	54,57,59,63
MAD1_MOUSE	MAD1_MOUSE_0	87.88
OSBL3_MOUSE	OSBL3_MOUSE_0	337,339,341
OSBL3_MOUSE	OSBL3_MOUSE_1	28.32
OSBL3_MOUSE	OSBL3_MOUSE_2	270,271,276,287,290
PI5PA_MOUSE	PI5PA_MOUSE_0	273,278,280
PI5PA_MOUSE	PI5PA_MOUSE_1	347,349,351
PI5PA_MOUSE	PI5PA_MOUSE_2	882.884
PI5PA_MOUSE	PI5PA_MOUSE_3	984.986
RLA2_MOUSE	RLA2_MOUSE_0	101.104
RLA2_MOUSE	RLA2_MOUSE_1	15,16,18
SIR2_MOUSE	SIR2_MOUSE_0	22,24,26
SIR2_MOUSE	SIR2_MOUSE_1	355,357,363,367,371
TESK2_MOUSE	TESK2_MOUSE_0	366,368,378
TESK2_MOUSE	TESK2_MOUSE_1	455.459
BCOR_MOUSE	BCOR_MOUSE_0	1127,1130,1142,1145,1146,1150
BCOR_MOUSE	BCOR_MOUSE_1	562,563,568,570
BCOR_MOUSE	BCOR_MOUSE_2	1432,1435,1442
SV2A_MOUSE	SV2A_MOUSE_0	41,44,46,64,65,79,80,83,93,97
HDGR3_MOUSE	HDGR3_MOUSE_0	106,107,109,116,120,121
HDGR3_MOUSE	HDGR3_MOUSE_1	176,177,178,187
LUR1L_MOUSE	LUR1L_MOUSE_0	67,71,73
LUR1L_MOUSE	LUR1L_MOUSE_1	129,132,140,143
IQEC2_MOUSE	IQEC2_MOUSE_0	1112,1113,1117,1118,1132,1137,1147,1150,1153,1154,1158,1161,1162
IQEC2_MOUSE	IQEC2_MOUSE_1	81,86,88
IQEC2_MOUSE	IQEC2_MOUSE_2	209,211,212,213
IQEC2_MOUSE	IQEC2_MOUSE_3	362.364
IQEC2_MOUSE	IQEC2_MOUSE_4	589,592,596
APOA1_MOUSE	APOA1_MOUSE_0	57.59
KS6A2_MOUSE	KS6A2_MOUSE_0	355.359
NDRG1_MOUSE	NDRG1_MOUSE_0	313,316,318,325,327,329,331,332,334,335,339,341,343,345,346,351,353,355,356,359,361,363,365,366,374,377,380,388
CLD18_MOUSE	CLD18_MOUSE_0	230,235,243,249,255,258,260,262
RN219_MOUSE	RN219_MOUSE_0	303,305,311
RN219_MOUSE	RN219_MOUSE_1	519,520,521
RN219_MOUSE	RN219_MOUSE_2	563.565
ACTG_MOUSE	ACTG_MOUSE_0	51.52
ACTG_MOUSE	ACTG_MOUSE_1	364.367
ACTG_MOUSE	ACTG_MOUSE_2	232,234,238,239
KCTD1_MOUSE	KCTD1_MOUSE_0	8.11
KI20A_MOUSE	KI20A_MOUSE_0	6,13,20
KI20A_MOUSE	KI20A_MOUSE_1	854,864,866,875,880
RCOR2_MOUSE	RCOR2_MOUSE_0	30,34,35,62,66
ANPRA_MOUSE	ANPRA_MOUSE_0	524,527,529,537
DEDD_MOUSE	DEDD_MOUSE_0	120,121,124,126
P4K2B_MOUSE	P4K2B_MOUSE_0	7.1
EZRI_MOUSE	EZRI_MOUSE_0	145.147
BCL9_MOUSE	BCL9_MOUSE_0	685.687
BCL9_MOUSE	BCL9_MOUSE_1	101,103,106
BCL9_MOUSE	BCL9_MOUSE_2	152,154,156,160
LA_MOUSE	LA_MOUSE_0	91.93
YES_MOUSE	YES_MOUSE_0	10,15,21,25,31,37,43
YES_MOUSE	YES_MOUSE_1	73.74
SIM24_MOUSE	SIM24_MOUSE_0	108.109
TAF1_MOUSE	TAF1_MOUSE_0	1170,1172,1174,1175
TAF1_MOUSE	TAF1_MOUSE_1	1689,1692,1798,1801,1802,1816,1819,1820,1822,1823
TAF1_MOUSE	TAF1_MOUSE_2	542.546
PTEN_MOUSE	PTEN_MOUSE_0	365,369,379,381,382,384
PYR1_MOUSE	PYR1_MOUSE_0	2107.21
PYR1_MOUSE	PYR1_MOUSE_1	1822,1823,1826,1827,1830,1831,1832
TNIP1_MOUSE	TNIP1_MOUSE_0	277.278
TNIP1_MOUSE	TNIP1_MOUSE_1	440,444,447,454
DOCK9_MOUSE	DOCK9_MOUSE_0	177.18
DOCK9_MOUSE	DOCK9_MOUSE_1	1219.12
DOCK9_MOUSE	DOCK9_MOUSE_2	1260,1263,1269,1272
ABLM2_MOUSE	ABLM2_MOUSE_0	472.476
ABLM2_MOUSE	ABLM2_MOUSE_1	277,279,284,288,289,290,291,293,295
SARNP_MOUSE	SARNP_MOUSE_0	161,162,167
MARK4_MOUSE	MARK4_MOUSE_0	437,439,440,441
MARK4_MOUSE	MARK4_MOUSE_1	664,665,666
ANO3_MOUSE	ANO3_MOUSE_0	6.9
KSYK_MOUSE	KSYK_MOUSE_0	288,289,290,309,312,316,319,341,345
HMGA1_MOUSE	HMGA1_MOUSE_0	1,5,8,35,38,43,48,52
HMGA1_MOUSE	HMGA1_MOUSE_1	98,101,102
TDT_MOUSE	TDT_MOUSE_0	131.133
HIPK2_MOUSE	HIPK2_MOUSE_0	134.14
HIPK2_MOUSE	HIPK2_MOUSE_1	990.992
VISTA_MOUSE	VISTA_MOUSE_0	231.233
TTC7B_MOUSE	TTC7B_MOUSE_0	622,624,628,629,634
TTC7B_MOUSE	TTC7B_MOUSE_1	672,676,677,680,681
TTC7B_MOUSE	TTC7B_MOUSE_2	159,160,161
CADH8_MOUSE	CADH8_MOUSE_0	790.794
DRC7_MOUSE	DRC7_MOUSE_0	575,577,578
CE104_MOUSE	CE104_MOUSE_0	326.33
AAK1_MOUSE	AAK1_MOUSE_0	934.935
AAK1_MOUSE	AAK1_MOUSE_1	353,358,359,361
AAK1_MOUSE	AAK1_MOUSE_2	602,603,607,615,617,620,621,624,634,637,639,649,650,665,667,670,671,673,675
AAK1_MOUSE	AAK1_MOUSE_3	6,12,13,17,20,25,27
H2B1H_MOUSE	H2B1H_MOUSE_0	87.88
H2B1H_MOUSE	H2B1H_MOUSE_1	36,37,38,40
H2B1H_MOUSE	H2B1H_MOUSE_2	112,115,119,122
MKRN2_MOUSE	MKRN2_MOUSE_0	137,138,145
VP26A_MOUSE	VP26A_MOUSE_0	314,317,320
DCTN1_MOUSE	DCTN1_MOUSE_0	103,104,107
TRMO_MOUSE	TRMO_MOUSE_0	292.295
NRK_MOUSE	NRK_MOUSE_0	1111,1116,1120
NRK_MOUSE	NRK_MOUSE_1	848,849,853
AIF1L_MOUSE	AIF1L_MOUSE_0	132.133
ABLM3_MOUSE	ABLM3_MOUSE_0	275,276,278,279,281,285,286,289
ABLM3_MOUSE	ABLM3_MOUSE_1	371,372,378,380,387,389,393,403,406,407,409,411,470,474,485,488,491,501,502,533,534
ABLM3_MOUSE	ABLM3_MOUSE_2	565,570,574,583
TBC9B_MOUSE	TBC9B_MOUSE_0	390,396,398
TBC9B_MOUSE	TBC9B_MOUSE_1	1084,1089,1091
TBC9B_MOUSE	TBC9B_MOUSE_2	1250,1251,1252,1253
GRTP1_MOUSE	GRTP1_MOUSE_0	108.11
SCN5A_MOUSE	SCN5A_MOUSE_0	35,37,38,41
SCN5A_MOUSE	SCN5A_MOUSE_1	456,459,482,483,485
SCN5A_MOUSE	SCN5A_MOUSE_2	509,515,523,524,527
NF2L2_MOUSE	NF2L2_MOUSE_0	334,337,341,346,350,354
HCLS1_MOUSE	HCLS1_MOUSE_0	174.176
HCLS1_MOUSE	HCLS1_MOUSE_1	322,326,329,332
8ODP_MOUSE	8ODP_MOUSE_0	1,2,3
EAF1_MOUSE	EAF1_MOUSE_0	156.157
EAF1_MOUSE	EAF1_MOUSE_1	259,261,263,265
IF2P_MOUSE	IF2P_MOUSE_0	106,107,113,126,131,136,138,144,148,164,171,178,182,183,186,190,208,211,214,221,222
IF2P_MOUSE	IF2P_MOUSE_1	579,583,584,586,588,590,595
PDLI7_MOUSE	PDLI7_MOUSE_0	213,214,216,218,219
CC85A_MOUSE	CC85A_MOUSE_0	177.18
ACBD5_MOUSE	ACBD5_MOUSE_0	158,159,162,163,171,172,183,184,186,190
ACBD5_MOUSE	ACBD5_MOUSE_1	362,363,376,380,381
ACBD5_MOUSE	ACBD5_MOUSE_2	417.42
MYCN_MOUSE	MYCN_MOUSE_0	57,61,63
MAST4_MOUSE	MAST4_MOUSE_0	245,248,254
MAST4_MOUSE	MAST4_MOUSE_1	350,352,354
MAST4_MOUSE	MAST4_MOUSE_2	1280,1289,1290,1293,1297
MAST4_MOUSE	MAST4_MOUSE_3	1330,1331,1332,1336,1340,1346,1347,1356,1367,1374,1381,1383,1387,1388,1392,1394
BECN1_MOUSE	BECN1_MOUSE_0	87,90,93,101
KDM6A_MOUSE	KDM6A_MOUSE_0	805,808,810,817,824,826,828
MTBP_MOUSE	MTBP_MOUSE_0	570.572
PDE4D_MOUSE	PDE4D_MOUSE_0	239.243
PDE4D_MOUSE	PDE4D_MOUSE_1	286.288
PDE4D_MOUSE	PDE4D_MOUSE_2	312.313
PDE4D_MOUSE	PDE4D_MOUSE_3	135,137,140
GAB1_MOUSE	GAB1_MOUSE_0	241,249,250,252,258
GAB1_MOUSE	GAB1_MOUSE_1	303,305,306,311,315,316
GAB1_MOUSE	GAB1_MOUSE_2	387,389,402,406,411,417,418,419
GAB1_MOUSE	GAB1_MOUSE_3	499,500,503
GAB1_MOUSE	GAB1_MOUSE_4	634,638,646,648,651
GRIN1_MOUSE	GRIN1_MOUSE_0	52,56,61
GRIN1_MOUSE	GRIN1_MOUSE_1	218.219
GRIN1_MOUSE	GRIN1_MOUSE_2	445.447
GRIN1_MOUSE	GRIN1_MOUSE_3	574,575,581,611,617,619,621
GRIN1_MOUSE	GRIN1_MOUSE_4	690.692
GRIN1_MOUSE	GRIN1_MOUSE_5	779,785,787
SHSA6_MOUSE	SHSA6_MOUSE_0	245,246,251
SHSA6_MOUSE	SHSA6_MOUSE_1	415,421,427,433,437
TET2_MOUSE	TET2_MOUSE_0	373,375,377,378,380,463,465
TET2_MOUSE	TET2_MOUSE_1	11,14,22,25
KS6A6_MOUSE	KS6A6_MOUSE_0	387.391
FRITZ_MOUSE	FRITZ_MOUSE_0	603.604
CUX1_MOUSE	CUX1_MOUSE_0	881,884,903,907
CUX1_MOUSE	CUX1_MOUSE_1	1210.12
MDR1A_MOUSE	MDR1A_MOUSE_0	653,655,656,662,663,666
LEUK_MOUSE	LEUK_MOUSE_0	338,342,346
LEUK_MOUSE	LEUK_MOUSE_1	377.379
TBA1B_MOUSE	TBA1B_MOUSE_0	40.47
TBA1B_MOUSE	TBA1B_MOUSE_1	160.164
PESC_MOUSE	PESC_MOUSE_0	279.281
ASTN1_MOUSE	ASTN1_MOUSE_0	375.378
ASTN1_MOUSE	ASTN1_MOUSE_1	215,226,227,229,231
ASTN1_MOUSE	ASTN1_MOUSE_2	191.193
LRIG1_MOUSE	LRIG1_MOUSE_0	1065.11
SPY2_MOUSE	SPY2_MOUSE_0	10,16,20
IASPP_MOUSE	IASPP_MOUSE_0	330,333,339
IASPP_MOUSE	IASPP_MOUSE_1	484.486
IASPP_MOUSE	IASPP_MOUSE_2	72,80,83,101,104,109,112,119,122
SYLC_MOUSE	SYLC_MOUSE_0	154,155,157
CC162_MOUSE	CC162_MOUSE_0	348.35
T11L2_MOUSE	T11L2_MOUSE_0	38,40,41,43,44,45,47,48,49,53,54
DHB4_MOUSE	DHB4_MOUSE_0	51.52
DHB4_MOUSE	DHB4_MOUSE_1	303,307,312
TAB3_MOUSE	TAB3_MOUSE_0	386,388,395,404,407,509,512
TAB3_MOUSE	TAB3_MOUSE_1	100.102
TAGL3_MOUSE	TAGL3_MOUSE_0	6.7
SYT4_MOUSE	SYT4_MOUSE_0	134.137
SMRC1_MOUSE	SMRC1_MOUSE_0	326,328,333,335,337
SMRC1_MOUSE	SMRC1_MOUSE_1	820.823
PDE4A_MOUSE	PDE4A_MOUSE_0	671.673
PDE4A_MOUSE	PDE4A_MOUSE_1	10,12,14
SNPC4_MOUSE	SNPC4_MOUSE_0	1178.12
MYCT_MOUSE	MYCT_MOUSE_0	628.633
MYCT_MOUSE	MYCT_MOUSE_1	1.5
MYCT_MOUSE	MYCT_MOUSE_2	43.46
PHF10_MOUSE	PHF10_MOUSE_0	295.299
PHF10_MOUSE	PHF10_MOUSE_1	325.329
AGTRA_MOUSE	AGTRA_MOUSE_0	330,337,341
PI4KB_MOUSE	PI4KB_MOUSE_0	274,276,279,281,283,291,293
PI4KB_MOUSE	PI4KB_MOUSE_1	424.427
PI4KB_MOUSE	PI4KB_MOUSE_2	510.516
IF44L_MOUSE	IF44L_MOUSE_0	303.308
NFAM1_MOUSE	NFAM1_MOUSE_0	214,216,222,232,234,238,240,243
MYL9_MOUSE	MYL9_MOUSE_0	18,19,28
PCNP_MOUSE	PCNP_MOUSE_0	83,86,92,97,100
CTNB1_MOUSE	CTNB1_MOUSE_0	22,28,32,36,40,44
CTNB1_MOUSE	CTNB1_MOUSE_1	550,551,555
PRS6B_MOUSE	PRS6B_MOUSE_0	20,24,27
CXA1_MOUSE	CXA1_MOUSE_0	246,249,254,256,261,264,266,272,274,278,281,285,289,295,296,300,305,312,313,324,325,327,329
CXA1_MOUSE	CXA1_MOUSE_1	363,364,367,368,371,372
PRAM_MOUSE	PRAM_MOUSE_0	249.251
PRAM_MOUSE	PRAM_MOUSE_1	330,331,351,355,365,366,367,373
ADA2A_MOUSE	ADA2A_MOUSE_0	344.346
K0930_MOUSE	K0930_MOUSE_0	262,263,266,267,271,275,278,286,288,289,292,303,305,321,323,350,352
F126B_MOUSE	F126B_MOUSE_0	449,452,453,455
F126B_MOUSE	F126B_MOUSE_1	292.293
KLH29_MOUSE	KLH29_MOUSE_0	92.93
FRM4B_MOUSE	FRM4B_MOUSE_0	940.943
FRM4B_MOUSE	FRM4B_MOUSE_1	694,697,703
TAA7D_MOUSE	TAA7D_MOUSE_0	252,258,259
HMGA2_MOUSE	HMGA2_MOUSE_0	98,99,100,103
SRSF7_MOUSE	SRSF7_MOUSE_0	183,185,187,191,193,195,199,201,203,207,209,211,215,220,222,224,226,228,230,232,241,243,245,249,251,253,255,259,261
ZN239_MOUSE	ZN239_MOUSE_0	25.28
CAB39_MOUSE	CAB39_MOUSE_0	323.324
UTP6_MOUSE	UTP6_MOUSE_0	157.159
LIMD1_MOUSE	LIMD1_MOUSE_0	370,371,375,377,396,398,412,414
DECR2_MOUSE	DECR2_MOUSE_0	211,213,222,225,232
CORO7_MOUSE	CORO7_MOUSE_0	852,859,862,875,876,879
CORO7_MOUSE	CORO7_MOUSE_1	664.665
CORO7_MOUSE	CORO7_MOUSE_2	455,458,461
RGS3_MOUSE	RGS3_MOUSE_0	711,714,719
ACADV_MOUSE	ACADV_MOUSE_0	513.517
ACADV_MOUSE	ACADV_MOUSE_1	54,56,57,60,70
TRI42_MOUSE	TRI42_MOUSE_0	136,137,141
MTF1_MOUSE	MTF1_MOUSE_0	141,148,150
LMTK3_MOUSE	LMTK3_MOUSE_0	530,532,534
FHAD1_MOUSE	FHAD1_MOUSE_0	342.343
TMM91_MOUSE	TMM91_MOUSE_0	37.42
DC1L1_MOUSE	DC1L1_MOUSE_0	388,397,404,407,411,413,414,418,420
DC1L1_MOUSE	DC1L1_MOUSE_1	507,509,511,512,514,515,517,522
EVI5_MOUSE	EVI5_MOUSE_0	97,99,101,104,108,112,115,123
EVI5_MOUSE	EVI5_MOUSE_1	775.777
LZTS3_MOUSE	LZTS3_MOUSE_0	342,344,674,676
MAPK2_MOUSE	MAPK2_MOUSE_0	2.4
MAPK2_MOUSE	MAPK2_MOUSE_1	302,313,319,323,324
NPM3_MOUSE	NPM3_MOUSE_0	146,150,154
EIF3G_MOUSE	EIF3G_MOUSE_0	37,40,41
E41LA_MOUSE	E41LA_MOUSE_0	540,542,648,651
BRAP_MOUSE	BRAP_MOUSE_0	115.117
ZFP91_MOUSE	ZFP91_MOUSE_0	78,84,85,87
ZFP91_MOUSE	ZFP91_MOUSE_1	158,159,166,169,171,172
JAK2_MOUSE	JAK2_MOUSE_0	1006.1
MRP2_MOUSE	MRP2_MOUSE_0	897,899,905,914,926,927,932
MRP2_MOUSE	MRP2_MOUSE_1	278,280,289
ELF1_MOUSE	ELF1_MOUSE_0	186.188
SP30L_MOUSE	SP30L_MOUSE_0	91.97
CCAR1_MOUSE	CCAR1_MOUSE_0	325.329
ADRB2_MOUSE	ADRB2_MOUSE_0	260.261
ADRB2_MOUSE	ADRB2_MOUSE_1	344,345,354,355
COPE_MOUSE	COPE_MOUSE_0	9.12
ORC6_MOUSE	ORC6_MOUSE_0	205.207
IZUM1_MOUSE	IZUM1_MOUSE_0	387.391
RAE1_MOUSE	RAE1_MOUSE_0	659.663
RHG21_MOUSE	RHG21_MOUSE_0	849,854,859,871,873,916,917,918
RHG21_MOUSE	RHG21_MOUSE_1	434.436
RHG21_MOUSE	RHG21_MOUSE_2	468,470,476
RHG21_MOUSE	RHG21_MOUSE_3	1423,1424,1425,1500,1502
RHG21_MOUSE	RHG21_MOUSE_4	1654,1657,1660,1662,1667,1693,1698,1706,1708,1727,1728
RHG21_MOUSE	RHG21_MOUSE_5	1845,1846,1848,1900,1904
FL2D_MOUSE	FL2D_MOUSE_0	253,255,256,286,287,289,296,297,335,337,340,344,347,349
TMG4_MOUSE	TMG4_MOUSE_0	199.201
CMTA2_MOUSE	CMTA2_MOUSE_0	267,269,271
LURA1_MOUSE	LURA1_MOUSE_0	101,105,112,117,121,125,128,132
LURA1_MOUSE	LURA1_MOUSE_1	187,189,193,195
SEM6A_MOUSE	SEM6A_MOUSE_0	697.7
EPN4_MOUSE	EPN4_MOUSE_0	166,170,173
EPN4_MOUSE	EPN4_MOUSE_1	234,239,241
EPN4_MOUSE	EPN4_MOUSE_2	306,312,313,315
ACM4_MOUSE	ACM4_MOUSE_0	245.251
IKBD_MOUSE	IKBD_MOUSE_0	24,27,34,36
TI17B_MOUSE	TI17B_MOUSE_0	154.159
STAR3_MOUSE	STAR3_MOUSE_0	209,213,217,221,226
STAR3_MOUSE	STAR3_MOUSE_1	26.28
MED19_MOUSE	MED19_MOUSE_0	193.195
MED19_MOUSE	MED19_MOUSE_1	233.237
REV3L_MOUSE	REV3L_MOUSE_0	1112,1117,1122
REV3L_MOUSE	REV3L_MOUSE_1	1850.19
SURF2_MOUSE	SURF2_MOUSE_0	189.195
DCR1A_MOUSE	DCR1A_MOUSE_0	573,577,593,595
TPD52_MOUSE	TPD52_MOUSE_0	34,35,39
TPD52_MOUSE	TPD52_MOUSE_1	154,157,169,171,174
PALLD_MOUSE	PALLD_MOUSE_0	1003.1
PALLD_MOUSE	PALLD_MOUSE_1	1125,1128,1130,1140,1142,1145
PALLD_MOUSE	PALLD_MOUSE_2	1297.13
PALLD_MOUSE	PALLD_MOUSE_3	1391.14
PALLD_MOUSE	PALLD_MOUSE_4	51.52
PALLD_MOUSE	PALLD_MOUSE_5	638,641,647,649
PALLD_MOUSE	PALLD_MOUSE_6	766,768,770,774,778,781,783
DEN4C_MOUSE	DEN4C_MOUSE_0	735,737,739
DEN4C_MOUSE	DEN4C_MOUSE_1	1795,1798,1805,1810
DEN4C_MOUSE	DEN4C_MOUSE_2	1081,1085,1086,1091,1093,1095
DEN4C_MOUSE	DEN4C_MOUSE_3	1239,1243,1245,1247
DEN4C_MOUSE	DEN4C_MOUSE_4	1309,1311,1314,1318,1319,1320
DEN4C_MOUSE	DEN4C_MOUSE_5	1619,1630,1634,1636,1647,1656,1658,1661
DEN4C_MOUSE	DEN4C_MOUSE_6	965,970,972
OTUD5_MOUSE	OTUD5_MOUSE_0	174.176
BACH2_MOUSE	BACH2_MOUSE_0	248,249,253,254,256,259,263,279,282,286,288,292,296,313,317,319,320,322,330,332,334,335,337,341,346
BACH2_MOUSE	BACH2_MOUSE_1	638.639
BACH2_MOUSE	BACH2_MOUSE_2	428,432,434,441,445,447,508,513,517,518,519,520,522,523,525,531,534,537,544,545,546,549,585,587,588,591,593,595
BACH2_MOUSE	BACH2_MOUSE_3	796,800,802,812,814,816
MRGBP_MOUSE	MRGBP_MOUSE_0	190,194,196
RS3A_MOUSE	RS3A_MOUSE_0	236.237
ZEP2_MOUSE	ZEP2_MOUSE_0	2412,2414,2422
ZEP2_MOUSE	ZEP2_MOUSE_1	1430.14
ZEP2_MOUSE	ZEP2_MOUSE_2	165.168
ZEP2_MOUSE	ZEP2_MOUSE_3	796,798,804,810
ZEP2_MOUSE	ZEP2_MOUSE_4	941,942,945,946
ZEP2_MOUSE	ZEP2_MOUSE_5	1039.1
ZEP2_MOUSE	ZEP2_MOUSE_6	2182.22
GALK1_MOUSE	GALK1_MOUSE_0	229.232
TLK1_MOUSE	TLK1_MOUSE_0	19,21,23
TLK1_MOUSE	TLK1_MOUSE_1	67,73,76,77,79,81
TLK1_MOUSE	TLK1_MOUSE_2	157,158,178,180
CFDP1_MOUSE	CFDP1_MOUSE_0	79,82,83,84
CFDP1_MOUSE	CFDP1_MOUSE_1	134,138,139,201,202,205
AAAS_MOUSE	AAAS_MOUSE_0	510,521,524,534,535,540,543
GPC5B_MOUSE	GPC5B_MOUSE_0	351,354,368,374,379,382,385
RARA_MOUSE	RARA_MOUSE_0	444,448,455,460
DNER_MOUSE	DNER_MOUSE_0	720.721
APOE_MOUSE	APOE_MOUSE_0	133,138,139,147,148
NFKB2_MOUSE	NFKB2_MOUSE_0	857,858,864,868
SYTL3_MOUSE	SYTL3_MOUSE_0	241.242
SPSB1_MOUSE	SPSB1_MOUSE_0	17.18
ACM1_MOUSE	ACM1_MOUSE_0	450,454,456
ACM1_MOUSE	ACM1_MOUSE_1	227,229,240,243,250,253
ACM1_MOUSE	ACM1_MOUSE_2	320,321,324,353,355
NOP58_MOUSE	NOP58_MOUSE_0	508,514,515,516,520
PFKAP_MOUSE	PFKAP_MOUSE_0	771.776
HNRPK_MOUSE	HNRPK_MOUSE_0	370,378,379
HNRPK_MOUSE	HNRPK_MOUSE_1	35.38
HNRPK_MOUSE	HNRPK_MOUSE_2	106,115,117,119,120
HNRPK_MOUSE	HNRPK_MOUSE_3	74,76,80,88
HNRPK_MOUSE	HNRPK_MOUSE_4	279.283
KIF27_MOUSE	KIF27_MOUSE_0	642.645
SR1IP_MOUSE	SR1IP_MOUSE_0	93,94,95,96,98,142,143,145,147,150
MPDZ_MOUSE	MPDZ_MOUSE_0	495,500,501
MPDZ_MOUSE	MPDZ_MOUSE_1	230.234
MPDZ_MOUSE	MPDZ_MOUSE_2	1592.16
MPDZ_MOUSE	MPDZ_MOUSE_3	1802,1804,1805,1808,1814,1816,1820
ADT2_MOUSE	ADT2_MOUSE_0	241.246
FBX38_MOUSE	FBX38_MOUSE_0	591,598,600,606
ZN827_MOUSE	ZN827_MOUSE_0	754,755,756,760,767,770
ZN827_MOUSE	ZN827_MOUSE_1	229.232
DNM3A_MOUSE	DNM3A_MOUSE_0	385.388
DNM3A_MOUSE	DNM3A_MOUSE_1	117.119
DEN1C_MOUSE	DEN1C_MOUSE_0	607.608
DEN1C_MOUSE	DEN1C_MOUSE_1	695.698
ITA4_MOUSE	ITA4_MOUSE_0	1027,1029,1030
CEBPA_MOUSE	CEBPA_MOUSE_0	221,225,229
ABI3_MOUSE	ABI3_MOUSE_0	215.218
DDX54_MOUSE	DDX54_MOUSE_0	29,32,37,39
M3K20_MOUSE	M3K20_MOUSE_0	633,635,636,637,639,648,649,686,689,690
M3K20_MOUSE	M3K20_MOUSE_1	566.567
AKAP1_MOUSE	AKAP1_MOUSE_0	377,379,393,394
AKAP1_MOUSE	AKAP1_MOUSE_1	518,523,526,530
AKAP1_MOUSE	AKAP1_MOUSE_2	100,102,103,108,114
K1C14_MOUSE	K1C14_MOUSE_0	9,10,12,23,27,28,34,39
K1C14_MOUSE	K1C14_MOUSE_1	438,440,443,446
MPP8_MOUSE	MPP8_MOUSE_0	24.27
MPP8_MOUSE	MPP8_MOUSE_1	135,137,141,143
RHG42_MOUSE	RHG42_MOUSE_0	703,706,719,722,754,755,758,763
LIGO1_MOUSE	LIGO1_MOUSE_0	595.601
LAP2B_MOUSE	LAP2B_MOUSE_0	304,305,313,316,319
LAP2B_MOUSE	LAP2B_MOUSE_1	352,353,355,360,376,383,385
LAP2B_MOUSE	LAP2B_MOUSE_2	152,154,156,157,158,162,164,165,166,170,175,178,181,182,188
LAP2B_MOUSE	LAP2B_MOUSE_3	262,263,274,276,277,287,290
LAP2B_MOUSE	LAP2B_MOUSE_4	58,65,66,73,78,81
HMCN1_MOUSE	HMCN1_MOUSE_0	4597,4599,4606,4608
HMCN1_MOUSE	HMCN1_MOUSE_1	5493.55
MACOI_MOUSE	MACOI_MOUSE_0	633.636
MACOI_MOUSE	MACOI_MOUSE_1	304,305,330,331
MTFR2_MOUSE	MTFR2_MOUSE_0	316.317
SYNE2_MOUSE	SYNE2_MOUSE_0	5759.58
SYNE2_MOUSE	SYNE2_MOUSE_1	6370,6374,6375,6399,6402,6416,6417,6418
SYNE2_MOUSE	SYNE2_MOUSE_2	4093,4095,4097,4110,4113
SYNE2_MOUSE	SYNE2_MOUSE_3	161,163,165
BNIP3_MOUSE	BNIP3_MOUSE_0	47,50,51,52,54,55,59,63,65,69,76,78,84,85,87,91,100
BNIP3_MOUSE	BNIP3_MOUSE_1	134.14
NMT1_MOUSE	NMT1_MOUSE_0	30,39,43,46
NUP98_MOUSE	NUP98_MOUSE_0	1769.18
NUP98_MOUSE	NUP98_MOUSE_1	607,611,617,622,624,626
NUP98_MOUSE	NUP98_MOUSE_2	669,672,679,680,681,686
NUP98_MOUSE	NUP98_MOUSE_3	1026,1034,1036,1039,1041,1053,1055,1058,1060,1062,1068
KIFA3_MOUSE	KIFA3_MOUSE_0	786.787
K0513_MOUSE	K0513_MOUSE_0	210.211
K0513_MOUSE	K0513_MOUSE_1	72.73
RIPL1_MOUSE	RIPL1_MOUSE_0	324,325,327
RIPL1_MOUSE	RIPL1_MOUSE_1	360.363
CR1L_MOUSE	CR1L_MOUSE_0	436.44
CR1L_MOUSE	CR1L_MOUSE_1	459,462,463,467,468,469,470,471,476,478,482
WNK2_MOUSE	WNK2_MOUSE_0	1705,1711,1712
WNK2_MOUSE	WNK2_MOUSE_1	1724.17
WNK2_MOUSE	WNK2_MOUSE_2	1768.18
PPR35_MOUSE	PPR35_MOUSE_0	45,47,52
SMUF1_MOUSE	SMUF1_MOUSE_0	10.11
KDM2A_MOUSE	KDM2A_MOUSE_0	712,717,719,720
KDM2A_MOUSE	KDM2A_MOUSE_1	796,797,799,801
ECSCR_MOUSE	ECSCR_MOUSE_0	203.206
ECSCR_MOUSE	ECSCR_MOUSE_1	80.86
FACD2_MOUSE	FACD2_MOUSE_0	9.16
FACD2_MOUSE	FACD2_MOUSE_1	1402,1403,1404
DCX_MOUSE	DCX_MOUSE_0	164.166
DCX_MOUSE	DCX_MOUSE_1	286,288,296,303,305,309,321,325,328,331,335,337,338,341,354,358,364
UBX2B_MOUSE	UBX2B_MOUSE_0	49,55,58,65
UBX2B_MOUSE	UBX2B_MOUSE_1	230,233,234
ZN106_MOUSE	ZN106_MOUSE_0	875,877,880
ZN106_MOUSE	ZN106_MOUSE_1	1035,1039,1040
ZN106_MOUSE	ZN106_MOUSE_2	430.432
ZN106_MOUSE	ZN106_MOUSE_3	1286,1290,1292,1295
ZN106_MOUSE	ZN106_MOUSE_4	1380.14
GSH0_MOUSE	GSH0_MOUSE_0	99,102,104,105
TBB4A_MOUSE	TBB4A_MOUSE_0	32,35,39
UT2_MOUSE	UT2_MOUSE_0	62.63
ZFR_MOUSE	ZFR_MOUSE_0	437.439
DSC3_MOUSE	DSC3_MOUSE_0	858,862,867
DSC3_MOUSE	DSC3_MOUSE_1	787.79
BC11B_MOUSE	BC11B_MOUSE_0	94.95
BC11B_MOUSE	BC11B_MOUSE_1	373,375,380,397,400,404,405
BC11B_MOUSE	BC11B_MOUSE_2	494,495,551,553,556
BC11B_MOUSE	BC11B_MOUSE_3	724,730,733,742,743,761,764,765,777,778,784
HEAT3_MOUSE	HEAT3_MOUSE_0	27.3
VAT1L_MOUSE	VAT1L_MOUSE_0	389,390,392,393
ZFPL1_MOUSE	ZFPL1_MOUSE_0	171,172,174,180,188,190,196
VSIG1_MOUSE	VSIG1_MOUSE_0	272.273
PI3R5_MOUSE	PI3R5_MOUSE_0	556,559,560,566
NUDT5_MOUSE	NUDT5_MOUSE_0	5,6,8,9,16,17
TMM51_MOUSE	TMM51_MOUSE_0	150,152,155,156,158,176,177
KMT2B_MOUSE	KMT2B_MOUSE_0	1916,1921,1924,1926,1930,1931,2063,2065
KMT2B_MOUSE	KMT2B_MOUSE_1	1036,1039,1043
KMT2B_MOUSE	KMT2B_MOUSE_2	112,113,117
KMT2B_MOUSE	KMT2B_MOUSE_3	589,590,596
TLR12_MOUSE	TLR12_MOUSE_0	571.574
LUZP1_MOUSE	LUZP1_MOUSE_0	981,985,987,988,992
GP157_MOUSE	GP157_MOUSE_0	323.328
CASP7_MOUSE	CASP7_MOUSE_0	15,16,17
TACC1_MOUSE	TACC1_MOUSE_0	400.404
RNH2A_MOUSE	RNH2A_MOUSE_0	298.299
RNH2A_MOUSE	RNH2A_MOUSE_1	3.1
MYZAP_MOUSE	MYZAP_MOUSE_0	4,5,8,11,17
KIF5A_MOUSE	KIF5A_MOUSE_0	805.806
PRSR1_MOUSE	PRSR1_MOUSE_0	595.599
MYPT2_MOUSE	MYPT2_MOUSE_0	390.392
MYPT2_MOUSE	MYPT2_MOUSE_1	443,445,501,502,503,504,523,525,549,550,551
MYPT2_MOUSE	MYPT2_MOUSE_2	643.644
RAB12_MOUSE	RAB12_MOUSE_0	14,19,23
ERBB3_MOUSE	ERBB3_MOUSE_0	1089,1090,1093,1117,1119
K1211_MOUSE	K1211_MOUSE_0	63,64,67,131,132,135
K1211_MOUSE	K1211_MOUSE_1	948,951,952,958
TRPS1_MOUSE	TRPS1_MOUSE_0	177,180,183
TRPS1_MOUSE	TRPS1_MOUSE_1	1060,1061,1065,1079,1080,1084
JADE2_MOUSE	JADE2_MOUSE_0	116.119
JADE2_MOUSE	JADE2_MOUSE_1	695,696,737,739
CND1_MOUSE	CND1_MOUSE_0	1299,1304,1318,1319,1322,1328,1357,1360,1361,1366,1378,1379
CND1_MOUSE	CND1_MOUSE_1	588,590,597,599
CHD4_MOUSE	CHD4_MOUSE_0	295,300,301,302,311,317,320,321,322
CHD4_MOUSE	CHD4_MOUSE_1	95,97,100,102,103
CHD4_MOUSE	CHD4_MOUSE_2	1352,1356,1359,1362
CHD4_MOUSE	CHD4_MOUSE_3	1523,1527,1529,1532,1534,1536,1537,1541,1545
CHD4_MOUSE	CHD4_MOUSE_4	695.697
CHD4_MOUSE	CHD4_MOUSE_5	507,509,521,523
SEP10_MOUSE	SEP10_MOUSE_0	406,412,413
TCPA_MOUSE	TCPA_MOUSE_0	543,544,550
TCPA_MOUSE	TCPA_MOUSE_1	156.157
KLDC4_MOUSE	KLDC4_MOUSE_0	402,404,411,417
AT133_MOUSE	AT133_MOUSE_0	901,904,907
TSR3_MOUSE	TSR3_MOUSE_0	9,20,23
BCAS3_MOUSE	BCAS3_MOUSE_0	479,485,486,487,489,491
BCAS3_MOUSE	BCAS3_MOUSE_1	822.824
BCAS3_MOUSE	BCAS3_MOUSE_2	848,849,868,870,876,885,897,899,909
BCAS3_MOUSE	BCAS3_MOUSE_3	564,569,571
BCAS3_MOUSE	BCAS3_MOUSE_4	705,708,711,714
BCAS3_MOUSE	BCAS3_MOUSE_5	3.8
HRH3_MOUSE	HRH3_MOUSE_0	323,326,331
KRIT1_MOUSE	KRIT1_MOUSE_0	275.276
MTMRC_MOUSE	MTMRC_MOUSE_0	563.567
PTPS_MOUSE	PTPS_MOUSE_0	26.28
DCR1C_MOUSE	DCR1C_MOUSE_0	514,517,519
DCR1C_MOUSE	DCR1C_MOUSE_1	379.384
SP110_MOUSE	SP110_MOUSE_0	174.176
SP110_MOUSE	SP110_MOUSE_1	213,215,219,225
SP110_MOUSE	SP110_MOUSE_2	358.36
EF2_MOUSE	EF2_MOUSE_0	53,56,58
GPTC2_MOUSE	GPTC2_MOUSE_0	32,37,38
GPTC2_MOUSE	GPTC2_MOUSE_1	113,115,127,128
RBM5_MOUSE	RBM5_MOUSE_0	620.623
RBM5_MOUSE	RBM5_MOUSE_1	53,56,58,68,71,75,77,81
K1C16_MOUSE	K1C16_MOUSE_0	9,10,12,23,27,28,34
ST17B_MOUSE	ST17B_MOUSE_0	9.11
RARG_MOUSE	RARG_MOUSE_0	76.78
ZN786_MOUSE	ZN786_MOUSE_0	190.191
MPP5_MOUSE	MPP5_MOUSE_0	82.83
P5I11_MOUSE	P5I11_MOUSE_0	13.15
ILF3_MOUSE	ILF3_MOUSE_0	59,66,72
ILF3_MOUSE	ILF3_MOUSE_1	674.675
ILF3_MOUSE	ILF3_MOUSE_2	811,813,863,866
ILF3_MOUSE	ILF3_MOUSE_3	381.383
ILF3_MOUSE	ILF3_MOUSE_4	468,475,476,481,485
LARP4_MOUSE	LARP4_MOUSE_0	67,68,70
LARP4_MOUSE	LARP4_MOUSE_1	376,377,379,382,386,388,395,397,398,399,410,418,419
LARP4_MOUSE	LARP4_MOUSE_2	577,578,580,582,585,589,591,595
LARP4_MOUSE	LARP4_MOUSE_3	637,641,643
HNRPD_MOUSE	HNRPD_MOUSE_0	79,81,82
HNRPD_MOUSE	HNRPD_MOUSE_1	189.192
NMDE2_MOUSE	NMDE2_MOUSE_0	928,929,931,934,939
NMDE2_MOUSE	NMDE2_MOUSE_1	916.919
NMDE2_MOUSE	NMDE2_MOUSE_2	881.885
NMDE2_MOUSE	NMDE2_MOUSE_3	1038,1042,1048,1057,1060,1063
NMDE2_MOUSE	NMDE2_MOUSE_4	1132,1138,1142
NMDE2_MOUSE	NMDE2_MOUSE_5	1251,1254,1258,1283,1285,1302,1303,1305
NMDE2_MOUSE	NMDE2_MOUSE_6	1333.13
CA198_MOUSE	CA198_MOUSE_0	171,173,175
TLS1_MOUSE	TLS1_MOUSE_0	14.16
LDB1_MOUSE	LDB1_MOUSE_0	17.18
LDB1_MOUSE	LDB1_MOUSE_1	301,304,305,322,325,330,331
ABRX2_MOUSE	ABRX2_MOUSE_0	279,283,284
ABRX2_MOUSE	ABRX2_MOUSE_1	360,362,367,371,374,376
ODPA_MOUSE	ODPA_MOUSE_0	292,294,299,300,302
ODPA_MOUSE	ODPA_MOUSE_1	230.231
VAMP8_MOUSE	VAMP8_MOUSE_0	4.6
VAMP8_MOUSE	VAMP8_MOUSE_1	47,53,54,61
BNIP2_MOUSE	BNIP2_MOUSE_0	113,115,118
SYNCI_MOUSE	SYNCI_MOUSE_0	313.314
STX7_MOUSE	STX7_MOUSE_0	40,44,74,77,78,80,124,125,128,135,136,143,148
PAPOG_MOUSE	PAPOG_MOUSE_0	506,508,511
PAPOG_MOUSE	PAPOG_MOUSE_1	555,557,601,602
INVS_MOUSE	INVS_MOUSE_0	1039.1
REXO1_MOUSE	REXO1_MOUSE_0	276.278
REXO1_MOUSE	REXO1_MOUSE_1	901,904,905
M3K11_MOUSE	M3K11_MOUSE_0	524.526
M3K11_MOUSE	M3K11_MOUSE_1	757,760,767,772,776,785,791,795
NAA15_MOUSE	NAA15_MOUSE_0	853.854
GRHL1_MOUSE	GRHL1_MOUSE_0	75.76
UFO_MOUSE	UFO_MOUSE_0	501,502,508
MED12_MOUSE	MED12_MOUSE_0	698.7
NDE1_MOUSE	NDE1_MOUSE_0	278,281,283,306,307,308,314,325,329
NDE1_MOUSE	NDE1_MOUSE_1	210,213,242,245
P66B_MOUSE	P66B_MOUSE_0	120,122,129,134,135,140
P66B_MOUSE	P66B_MOUSE_1	333,334,338,340,343
SPTCS_MOUSE	SPTCS_MOUSE_0	1931,1941,1942,1947
K1C15_MOUSE	K1C15_MOUSE_0	27,32,34
RC3H2_MOUSE	RC3H2_MOUSE_0	805.809
PURB_MOUSE	PURB_MOUSE_0	111.112
PURB_MOUSE	PURB_MOUSE_1	302,309,315
PURB_MOUSE	PURB_MOUSE_2	5.7
NMDZ1_MOUSE	NMDZ1_MOUSE_0	885,888,889,895,896
EM55_MOUSE	EM55_MOUSE_0	233,240,242
EM55_MOUSE	EM55_MOUSE_1	1,4,12,15,18,21,47,51,56
SKAP2_MOUSE	SKAP2_MOUSE_0	4,7,8
SKAP2_MOUSE	SKAP2_MOUSE_1	86.89
SKAP2_MOUSE	SKAP2_MOUSE_2	236,246,247,251
COBL_MOUSE	COBL_MOUSE_0	233.234
COBL_MOUSE	COBL_MOUSE_1	46.49
COBL_MOUSE	COBL_MOUSE_2	940.943
KRI1_MOUSE	KRI1_MOUSE_0	95,96,98
KRI1_MOUSE	KRI1_MOUSE_1	176,177,181,187
KRI1_MOUSE	KRI1_MOUSE_2	574.575
NELFA_MOUSE	NELFA_MOUSE_0	276,279,286,290,362,364,367
P2R3C_MOUSE	P2R3C_MOUSE_0	12.15
PCX1_MOUSE	PCX1_MOUSE_0	2154.22
UBP40_MOUSE	UBP40_MOUSE_0	727,729,733
UBP40_MOUSE	UBP40_MOUSE_1	1206.12
NPM_MOUSE	NPM_MOUSE_0	3.9
NPM_MOUSE	NPM_MOUSE_1	215,216,219,224,231,234,239,240,251,257
PEX5_MOUSE	PEX5_MOUSE_0	311.318
UBP54_MOUSE	UBP54_MOUSE_0	1341.13
UBP54_MOUSE	UBP54_MOUSE_1	1548,1549,1550,1552
UBP54_MOUSE	UBP54_MOUSE_2	377,380,384,419,421,423,427
ATX1L_MOUSE	ATX1L_MOUSE_0	327.33
ATX1L_MOUSE	ATX1L_MOUSE_1	446.453
F221B_MOUSE	F221B_MOUSE_0	286.287
PP1R8_MOUSE	PP1R8_MOUSE_0	345.347
PR40A_MOUSE	PR40A_MOUSE_0	779,782,823,825,827,829,878,880,883,885
PR40A_MOUSE	PR40A_MOUSE_1	927,928,930,933,943
PR40A_MOUSE	PR40A_MOUSE_2	33.35
PR40A_MOUSE	PR40A_MOUSE_3	104,105,108,113
ERMAP_MOUSE	ERMAP_MOUSE_0	503,508,511
COASY_MOUSE	COASY_MOUSE_0	176.181
PDXD1_MOUSE	PDXD1_MOUSE_0	683,686,690,694,709,713,717,719,720,721,723,735,736
RFIP1_MOUSE	RFIP1_MOUSE_0	339,341,343,345,356,357
KAP2_MOUSE	KAP2_MOUSE_0	54,55,58,61,62,73,75,77
PPIL4_MOUSE	PPIL4_MOUSE_0	177.181
PPIL4_MOUSE	PPIL4_MOUSE_1	476,478,482,488
MOCS1_MOUSE	MOCS1_MOUSE_0	462.465
CSPG2_MOUSE	CSPG2_MOUSE_0	1321.13
CSPG2_MOUSE	CSPG2_MOUSE_1	1280,1281,1282,1283
CSPG2_MOUSE	CSPG2_MOUSE_2	2581,2584,2585
CSPG2_MOUSE	CSPG2_MOUSE_3	1887.19
CSPG2_MOUSE	CSPG2_MOUSE_4	2257,2258,2262
CASZ1_MOUSE	CASZ1_MOUSE_0	718.719
FLCN_MOUSE	FLCN_MOUSE_0	61,71,72
CHCH2_MOUSE	CHCH2_MOUSE_0	9,12,40,44
CP045_MOUSE	CP045_MOUSE_0	163,164,166,167
TET3_MOUSE	TET3_MOUSE_0	1262.13
TET3_MOUSE	TET3_MOUSE_1	360,361,367
TET3_MOUSE	TET3_MOUSE_2	664,666,673
TOP2A_MOUSE	TOP2A_MOUSE_0	1290,1292,1294,1297,1298,1301
TOP2A_MOUSE	TOP2A_MOUSE_1	1366,1369,1370,1372,1378,1383,1387
TOP2A_MOUSE	TOP2A_MOUSE_2	1464,1465,1466,1468,1469,1471
TRUA_MOUSE	TRUA_MOUSE_0	410,411,415,421
CBX3_MOUSE	CBX3_MOUSE_0	92,94,96,98,101
DAAF5_MOUSE	DAAF5_MOUSE_0	329,335,340
THIKB_MOUSE	THIKB_MOUSE_0	164.165
THIKB_MOUSE	THIKB_MOUSE_1	242,250,251,252
NACA_MOUSE	NACA_MOUSE_0	30,33,42,43,45
NACA_MOUSE	NACA_MOUSE_1	158,160,165
RIOK2_MOUSE	RIOK2_MOUSE_0	477,479,480,483,488,489
FBX31_MOUSE	FBX31_MOUSE_0	32.36
CADH6_MOUSE	CADH6_MOUSE_0	780,785,789
PGFRB_MOUSE	PGFRB_MOUSE_0	738,746,749,761,768,769
ZZZ3_MOUSE	ZZZ3_MOUSE_0	95,96,97
OPRD_MOUSE	OPRD_MOUSE_0	343,351,352,357,360,362
DCE1_MOUSE	DCE1_MOUSE_0	70,71,76
SNTA1_MOUSE	SNTA1_MOUSE_0	299.302
SNTA1_MOUSE	SNTA1_MOUSE_1	182,186,193,194,203
ZFY26_MOUSE	ZFY26_MOUSE_0	174.18
ZFY26_MOUSE	ZFY26_MOUSE_1	1722,1729,1731,1743,1751,1753,1769,1771
ZFY26_MOUSE	ZFY26_MOUSE_2	1864.19
ZFY26_MOUSE	ZFY26_MOUSE_3	604,606,608
COCA1_MOUSE	COCA1_MOUSE_0	1100,1101,1105
MMP19_MOUSE	MMP19_MOUSE_0	259.262
GOGA4_MOUSE	GOGA4_MOUSE_0	36,38,39,40,42
GOGA4_MOUSE	GOGA4_MOUSE_1	92,95,99,116,118,121
GOGA4_MOUSE	GOGA4_MOUSE_2	2236.22
DHB8_MOUSE	DHB8_MOUSE_0	54.57
RPR1A_MOUSE	RPR1A_MOUSE_0	152.155
RBM39_MOUSE	RBM39_MOUSE_0	332,333,335,336,340,352,353
RBM39_MOUSE	RBM39_MOUSE_1	39,41,43,94,96,98,99,116,120,124,126,128,135,145
SOX8_MOUSE	SOX8_MOUSE_0	334.338
KIF22_MOUSE	KIF22_MOUSE_0	446,449,452,457
KIF22_MOUSE	KIF22_MOUSE_1	128,130,134
CA112_MOUSE	CA112_MOUSE_0	794.801
SVOP_MOUSE	SVOP_MOUSE_0	18,21,24,30
SVOP_MOUSE	SVOP_MOUSE_1	541,543,545
NRG3_MOUSE	NRG3_MOUSE_0	262,266,269
TEBP_MOUSE	TEBP_MOUSE_0	81.84
TEBP_MOUSE	TEBP_MOUSE_1	112,117,123,147,150
ZN768_MOUSE	ZN768_MOUSE_0	16,22,26,34,35
ZN768_MOUSE	ZN768_MOUSE_1	141,144,151,153,155
BUB1B_MOUSE	BUB1B_MOUSE_0	658,664,668,678,682,685
BUB1B_MOUSE	BUB1B_MOUSE_1	526,528,534
CDK6_MOUSE	CDK6_MOUSE_0	318.32
LPIN2_MOUSE	LPIN2_MOUSE_0	185.186
LPIN2_MOUSE	LPIN2_MOUSE_1	242,244,290,292
LPIN2_MOUSE	LPIN2_MOUSE_2	336,340,341,364,366
ITPR1_MOUSE	ITPR1_MOUSE_0	1754,1756,1757,1764
CSRP3_MOUSE	CSRP3_MOUSE_0	80.83
LPP_MOUSE	LPP_MOUSE_0	609.61
LPP_MOUSE	LPP_MOUSE_1	115.116
LPP_MOUSE	LPP_MOUSE_2	296,297,300,301,307,311,315,317
KLHL1_MOUSE	KLHL1_MOUSE_0	79.83
MRFL_MOUSE	MRFL_MOUSE_0	598,600,607
RAE1C_MOUSE	RAE1C_MOUSE_0	200,206,214,220
G137A_MOUSE	G137A_MOUSE_0	391.392
TIAM1_MOUSE	TIAM1_MOUSE_0	354,355,357
TIAM1_MOUSE	TIAM1_MOUSE_1	588.593
TIAM1_MOUSE	TIAM1_MOUSE_2	1007,1016,1017,1019
GRM2B_MOUSE	GRM2B_MOUSE_0	232,233,237
GRM2B_MOUSE	GRM2B_MOUSE_1	6.7
GRM2B_MOUSE	GRM2B_MOUSE_2	84.88
TGFB1_MOUSE	TGFB1_MOUSE_0	80,82,83
SPC1L_MOUSE	SPC1L_MOUSE_0	135.139
M21D2_MOUSE	M21D2_MOUSE_0	369,370,371,372,375,378
TMM40_MOUSE	TMM40_MOUSE_0	128.13
LST2_MOUSE	LST2_MOUSE_0	391.393
BICD1_MOUSE	BICD1_MOUSE_0	540,545,547,568,569,575,587,588
TBCD1_MOUSE	TBCD1_MOUSE_0	228,230,236,250,252,254,255
TBCD1_MOUSE	TBCD1_MOUSE_1	1236,1240,1241
TBCD1_MOUSE	TBCD1_MOUSE_2	488,496,498,500,503,518,520,558,559,563,564,566,574,578,589,591,606,607,611,620,622,623,659,660,696,697,698,699
BCL9L_MOUSE	BCL9L_MOUSE_0	20,24,87,89,92
BCL9L_MOUSE	BCL9L_MOUSE_1	115,117,120,128
BCL9L_MOUSE	BCL9L_MOUSE_2	930,932,938,943,945,950,953,971,976,977,983,985,987,993,1000,1006
LRRC7_MOUSE	LRRC7_MOUSE_0	826,830,833
LRRC7_MOUSE	LRRC7_MOUSE_1	864,866,867,868,925,928,932,946,948
LRRC7_MOUSE	LRRC7_MOUSE_2	438,440,442
LRRC7_MOUSE	LRRC7_MOUSE_3	1203.12
LRRC7_MOUSE	LRRC7_MOUSE_4	1335,1337,1342,1348
ACINU_MOUSE	ACINU_MOUSE_0	207,209,215
ACINU_MOUSE	ACINU_MOUSE_1	381,386,388,390,412,416,426,427,430
ACINU_MOUSE	ACINU_MOUSE_2	476,478,481,483,484,486,490,496
ACINU_MOUSE	ACINU_MOUSE_3	640,642,644,646,648,651,654,656
ACINU_MOUSE	ACINU_MOUSE_4	837,839,862,864,894,897,901,979,985,988
ACINU_MOUSE	ACINU_MOUSE_5	1325,1327,1328
NOL8_MOUSE	NOL8_MOUSE_0	695.699
NOL8_MOUSE	NOL8_MOUSE_1	776,782,786,788,818,819,824,869,871
NOL8_MOUSE	NOL8_MOUSE_2	1062,1063,1064
NOL8_MOUSE	NOL8_MOUSE_3	296,299,305,363,364,366
BRD2_MOUSE	BRD2_MOUSE_0	296,299,303
BRD2_MOUSE	BRD2_MOUSE_1	785,787,788,789,796
ANGL1_MOUSE	ANGL1_MOUSE_0	121.126
PPR37_MOUSE	PPR37_MOUSE_0	565,571,581,582
ABCBB_MOUSE	ABCBB_MOUSE_0	674,678,682,684,687,691,695,700,702,705,708
CWC22_MOUSE	CWC22_MOUSE_0	828.83
CWC22_MOUSE	CWC22_MOUSE_1	24,25,26,31,37,58,59,60,90,92,96,104,105
FRS2_MOUSE	FRS2_MOUSE_0	326,327,329,330
FRS2_MOUSE	FRS2_MOUSE_1	131,134,136,137
FRS2_MOUSE	FRS2_MOUSE_2	168,171,176
FRS2_MOUSE	FRS2_MOUSE_3	287.291
FRS2_MOUSE	FRS2_MOUSE_4	502.503
RNC_MOUSE	RNC_MOUSE_0	298,300,304,353,355
UGDH_MOUSE	UGDH_MOUSE_0	472.473
S30BP_MOUSE	S30BP_MOUSE_0	17,21,25
S30BP_MOUSE	S30BP_MOUSE_1	76.78
CC88B_MOUSE	CC88B_MOUSE_0	1349,1350,1352
CC88B_MOUSE	CC88B_MOUSE_1	1383.14
2A5A_MOUSE	2A5A_MOUSE_0	473.477
2A5A_MOUSE	2A5A_MOUSE_1	37,40,41,48
SCN2B_MOUSE	SCN2B_MOUSE_0	191,192,197
LRMP_MOUSE	LRMP_MOUSE_0	345,346,349,352,353,358,361,401,407,409,410,442,444,449
NCK2_MOUSE	NCK2_MOUSE_0	89,91,93,94,98,103
TNR6C_MOUSE	TNR6C_MOUSE_0	1504,1505,1507,1511
TNR6C_MOUSE	TNR6C_MOUSE_1	1001.1
TC1D2_MOUSE	TC1D2_MOUSE_0	59,62,63
CCAR2_MOUSE	CCAR2_MOUSE_0	221.223
CCAR2_MOUSE	CCAR2_MOUSE_1	605,609,611,624,625,669,673,676,679,683,684,685
TB182_MOUSE	TB182_MOUSE_0	1203,1206,1211
TB182_MOUSE	TB182_MOUSE_1	1130,1132,1135
TB182_MOUSE	TB182_MOUSE_2	1369,1370,1372,1374,1436,1439,1441,1443
TB182_MOUSE	TB182_MOUSE_3	1587,1592,1600,1601,1606,1610,1611
TB182_MOUSE	TB182_MOUSE_4	1642,1644,1652,1656
TB182_MOUSE	TB182_MOUSE_5	1701.17
TB182_MOUSE	TB182_MOUSE_6	245,246,299,304,307,308
TB182_MOUSE	TB182_MOUSE_7	495,499,502,505
TB182_MOUSE	TB182_MOUSE_8	712,714,715,717
TB182_MOUSE	TB182_MOUSE_9	865,868,870,875,886,888,889,893,909,910,911
TB182_MOUSE	TB182_MOUSE_10	973,975,976,979
TB182_MOUSE	TB182_MOUSE_11	1016,1021,1023,1024,1027
TB182_MOUSE	TB182_MOUSE_12	1060,1062,1064
STA5A_MOUSE	STA5A_MOUSE_0	772,778,786,789,792
NOL10_MOUSE	NOL10_MOUSE_0	541,545,546,548,549
TBA8_MOUSE	TBA8_MOUSE_0	436.438
NEMF_MOUSE	NEMF_MOUSE_0	1015,1019,1023
NEMF_MOUSE	NEMF_MOUSE_1	736.737
TOP2B_MOUSE	TOP2B_MOUSE_0	13.19
TOP2B_MOUSE	TOP2B_MOUSE_1	1223.12
TOP2B_MOUSE	TOP2B_MOUSE_2	1323,1327,1329,1331,1357,1358,1362
TOP2B_MOUSE	TOP2B_MOUSE_3	1438,1439,1443,1447,1452,1457,1459,1505,1508,1510,1512,1536,1538,1561,1562,1567
TOP2B_MOUSE	TOP2B_MOUSE_4	763.765
VAPA_MOUSE	VAPA_MOUSE_0	163,165,169,213,214,215
CD97_MOUSE	CD97_MOUSE_0	805,807,812,813
ASZ1_MOUSE	ASZ1_MOUSE_0	16,17,19
KIF15_MOUSE	KIF15_MOUSE_0	675.676
KIF15_MOUSE	KIF15_MOUSE_1	1140.11
RHG18_MOUSE	RHG18_MOUSE_0	151,155,256,259,262
RHG18_MOUSE	RHG18_MOUSE_1	62,64,67,71
GRP2_MOUSE	GRP2_MOUSE_0	389,392,393,395,396
GRP2_MOUSE	GRP2_MOUSE_1	115.116
GRP2_MOUSE	GRP2_MOUSE_2	553,555,562,564,566
PAR6B_MOUSE	PAR6B_MOUSE_0	9.1
KMT2D_MOUSE	KMT2D_MOUSE_0	1248,1249,1253
KMT2D_MOUSE	KMT2D_MOUSE_1	4667,4671,4674,4675,4679
KMT2D_MOUSE	KMT2D_MOUSE_2	2251.23
KMT2D_MOUSE	KMT2D_MOUSE_3	2739,2740,2745
KMT2D_MOUSE	KMT2D_MOUSE_4	2899.29
MICA1_MOUSE	MICA1_MOUSE_0	769,776,780,782,792,793
TRAK1_MOUSE	TRAK1_MOUSE_0	183,191,198,200,201
TRAK1_MOUSE	TRAK1_MOUSE_1	531,533,535,537
BRPF1_MOUSE	BRPF1_MOUSE_0	76.83
BRPF1_MOUSE	BRPF1_MOUSE_1	446,450,458,460
BRPF1_MOUSE	BRPF1_MOUSE_2	855,857,862,863
BRPF1_MOUSE	BRPF1_MOUSE_3	914,917,919,923,1014,1016,1018
MOGT1_MOUSE	MOGT1_MOUSE_0	167.169
ADRM1_MOUSE	ADRM1_MOUSE_0	1,2,3
ADRM1_MOUSE	ADRM1_MOUSE_1	210,212,216,218,222,223
PP2AA_MOUSE	PP2AA_MOUSE_0	303.306
CXG2_MOUSE	CXG2_MOUSE_0	423,428,430
ITB7_MOUSE	ITB7_MOUSE_0	795,797,799
CD226_MOUSE	CD226_MOUSE_0	318.325
MFSD5_MOUSE	MFSD5_MOUSE_0	439.441
ARFP2_MOUSE	ARFP2_MOUSE_0	71,73,75,77
NCOR2_MOUSE	NCOR2_MOUSE_0	741,742,746,749
NCOR2_MOUSE	NCOR2_MOUSE_1	953,954,1015,1020,1022
NCOR2_MOUSE	NCOR2_MOUSE_2	2409,2410,2468,2470
NCOR2_MOUSE	NCOR2_MOUSE_3	1219.12
NCOR2_MOUSE	NCOR2_MOUSE_4	2151,2154,2160
NCOR2_MOUSE	NCOR2_MOUSE_5	1811,1815,1818
NCOR2_MOUSE	NCOR2_MOUSE_6	2002,2003,2011,2014,2015,2017,2019
NCOR2_MOUSE	NCOR2_MOUSE_7	545,548,549
ST5_MOUSE	ST5_MOUSE_0	1,8,14,27,29,31,41,47,52,82,85,86
ST5_MOUSE	ST5_MOUSE_1	1062.11
ST5_MOUSE	ST5_MOUSE_2	1000.1
ST5_MOUSE	ST5_MOUSE_3	227,229,232,233,236
ST5_MOUSE	ST5_MOUSE_4	409.411
ST5_MOUSE	ST5_MOUSE_5	475,478,484
ACACA_MOUSE	ACACA_MOUSE_0	4,9,16,22,24,28,33,46,48,51,53,56,58,76,78
ACACA_MOUSE	ACACA_MOUSE_1	1257,1261,1263
ACACA_MOUSE	ACACA_MOUSE_2	2337.23
ACACA_MOUSE	ACACA_MOUSE_3	2151,2155,2157
SC31B_MOUSE	SC31B_MOUSE_0	158.163
SC31B_MOUSE	SC31B_MOUSE_1	471.472
AGRIN_MOUSE	AGRIN_MOUSE_0	568.57
IN80D_MOUSE	IN80D_MOUSE_0	130.132
SHIP1_MOUSE	SHIP1_MOUSE_0	931,932,934,940,944,952,963,966,971,976,1020,1022
SHIP1_MOUSE	SHIP1_MOUSE_1	1084,1089,1091
GDF5_MOUSE	GDF5_MOUSE_0	142.147
INTU_MOUSE	INTU_MOUSE_0	673.677
AKIR2_MOUSE	AKIR2_MOUSE_0	17.2
AKIR2_MOUSE	AKIR2_MOUSE_1	122,127,131
RMP_MOUSE	RMP_MOUSE_0	240.241
RMP_MOUSE	RMP_MOUSE_1	408,414,417,436,437,438,439,445,450
BMPR2_MOUSE	BMPR2_MOUSE_0	861,862,976,979
BMPR2_MOUSE	BMPR2_MOUSE_1	512,514,516
BMPR2_MOUSE	BMPR2_MOUSE_2	679.68
MAGI2_MOUSE	MAGI2_MOUSE_0	767,768,772
U2AF2_MOUSE	U2AF2_MOUSE_0	52.54
TRCG1_MOUSE	TRCG1_MOUSE_0	697.698
PTN21_MOUSE	PTN21_MOUSE_0	796,798,800,805
PTN21_MOUSE	PTN21_MOUSE_1	576,577,585,587,588,589
PTN21_MOUSE	PTN21_MOUSE_2	657,667,669,672,674,678,709,710
CRTP1_MOUSE	CRTP1_MOUSE_0	11.15
THMS1_MOUSE	THMS1_MOUSE_0	541.542
DGCR8_MOUSE	DGCR8_MOUSE_0	91.94
DGCR8_MOUSE	DGCR8_MOUSE_1	372.376
DGCR8_MOUSE	DGCR8_MOUSE_2	266,270,274,278
NIBAN_MOUSE	NIBAN_MOUSE_0	575,577,579,580,582,586,590,594,600
NIBAN_MOUSE	NIBAN_MOUSE_1	787,788,792
CAPR2_MOUSE	CAPR2_MOUSE_0	851.852
LRC25_MOUSE	LRC25_MOUSE_0	210,219,225,226
LRC25_MOUSE	LRC25_MOUSE_1	266,271,274,288,293
LTBP2_MOUSE	LTBP2_MOUSE_0	936,938,941,942
LTBP2_MOUSE	LTBP2_MOUSE_1	362.363
LTBP2_MOUSE	LTBP2_MOUSE_2	784,785,786
TRI25_MOUSE	TRI25_MOUSE_0	400,403,409
SNUT1_MOUSE	SNUT1_MOUSE_0	596,601,603
ZEP3_MOUSE	ZEP3_MOUSE_0	304,305,306,311
ZEP3_MOUSE	ZEP3_MOUSE_1	2198.22
ZEP3_MOUSE	ZEP3_MOUSE_2	1473,1479,1482,1485
ZHANG_MOUSE	ZHANG_MOUSE_0	210.212
RL22L_MOUSE	RL22L_MOUSE_0	111,117,119
UBXN1_MOUSE	UBXN1_MOUSE_0	178,181,184,186,187,191,198,199,201,206
NACC1_MOUSE	NACC1_MOUSE_0	140,144,149
NACC1_MOUSE	NACC1_MOUSE_1	491.495
FGD1_MOUSE	FGD1_MOUSE_0	709.713
FGD1_MOUSE	FGD1_MOUSE_1	81,91,92,97
EMAL2_MOUSE	EMAL2_MOUSE_0	14.19
SYNJ1_MOUSE	SYNJ1_MOUSE_0	1047,1048,1052,1054,1072,1074,1080,1083
MTSS1_MOUSE	MTSS1_MOUSE_0	258,261,264,265,267,269,271,274,275,278,279,295,297,299,302,318,319,321,322,325
MTSS1_MOUSE	MTSS1_MOUSE_1	572,573,578,579,595,597,598,601,606
TBC30_MOUSE	TBC30_MOUSE_0	633,636,641
DACH1_MOUSE	DACH1_MOUSE_0	483,485,489,570,573,574
FTO_MOUSE	FTO_MOUSE_0	256.257
HAIR_MOUSE	HAIR_MOUSE_0	827.831
EF2K_MOUSE	EF2K_MOUSE_0	18,26,28,30
EF2K_MOUSE	EF2K_MOUSE_1	69,70,72,75,76
EF2K_MOUSE	EF2K_MOUSE_2	346,351,357,362,364,365,366,375,378,384,390,393,394,396,397,402,433,436,443,447,468,472,475
RAB3I_MOUSE	RAB3I_MOUSE_0	137,140,146,148,213,214,216,217,219,228,239,241,242,247
ELYS_MOUSE	ELYS_MOUSE_0	1075,1079,1082,1086,1091,1137,1139,1141,1208,1209,1213,1215,1217,1221,1223
ELYS_MOUSE	ELYS_MOUSE_1	1927,1929,1930,1932
ELYS_MOUSE	ELYS_MOUSE_2	2197.22
RNF4_MOUSE	RNF4_MOUSE_0	93,97,98
CTNA1_MOUSE	CTNA1_MOUSE_0	633,640,644,651,653,654,657
NISCH_MOUSE	NISCH_MOUSE_0	1370.14
NISCH_MOUSE	NISCH_MOUSE_1	542,544,547
NISCH_MOUSE	NISCH_MOUSE_2	250,252,253,263
P2RX7_MOUSE	P2RX7_MOUSE_0	442.444
RIOK1_MOUSE	RIOK1_MOUSE_0	20,21,23
HDGR2_MOUSE	HDGR2_MOUSE_0	228,230,232,234,238,365,366,388,390,391,392,394
HDGR2_MOUSE	HDGR2_MOUSE_1	449.453
HDGR2_MOUSE	HDGR2_MOUSE_2	589.593
HDGR2_MOUSE	HDGR2_MOUSE_3	627,628,634,639,654,658,660,668
HDGF_MOUSE	HDGF_MOUSE_0	101,102,106,127,131,132
HDGF_MOUSE	HDGF_MOUSE_1	198,199,201,205
CASP3_MOUSE	CASP3_MOUSE_0	11,19,25
ZBTB4_MOUSE	ZBTB4_MOUSE_0	555.558
NRAM1_MOUSE	NRAM1_MOUSE_0	5,13,14,16,18,19
TITIN_MOUSE	TITIN_MOUSE_0	9143.91
TITIN_MOUSE	TITIN_MOUSE_1	23827.2
TITIN_MOUSE	TITIN_MOUSE_2	17677.2
TITIN_MOUSE	TITIN_MOUSE_3	2329.23
TITIN_MOUSE	TITIN_MOUSE_4	34290.3
TITIN_MOUSE	TITIN_MOUSE_5	34345.3
TITIN_MOUSE	TITIN_MOUSE_6	24311,24314,24316,24317
TITIN_MOUSE	TITIN_MOUSE_7	2580,2581,2583
TITIN_MOUSE	TITIN_MOUSE_8	19480.2
TITIN_MOUSE	TITIN_MOUSE_9	15362,15363,15370,15374
TITIN_MOUSE	TITIN_MOUSE_10	20962,20971,20973
TITIN_MOUSE	TITIN_MOUSE_11	33858,33860,33863,33866,33867,33868,33874,33879,33912,33914,33919,33926,33927,33930,33931,33932,33949,33955,33959,33960,33961,33962,33963
TITIN_MOUSE	TITIN_MOUSE_12	34008,34012,34014
TITIN_MOUSE	TITIN_MOUSE_13	34062,34064,34066,34067
TITIN_MOUSE	TITIN_MOUSE_14	34096,34098,34102,34106,34108,34111,34112,34115,34117,34122,34129,34131,34133
TITIN_MOUSE	TITIN_MOUSE_15	29410.3
TITIN_MOUSE	TITIN_MOUSE_16	24802.2
TITIN_MOUSE	TITIN_MOUSE_17	17097,17098,17108
TITIN_MOUSE	TITIN_MOUSE_18	1405,1407,1410,1412,1414,1419,1423,1428,1433,1438,1443
TITIN_MOUSE	TITIN_MOUSE_19	2077.21
TITIN_MOUSE	TITIN_MOUSE_20	3990.4
TITIN_MOUSE	TITIN_MOUSE_21	17505,17507,17510
TITIN_MOUSE	TITIN_MOUSE_22	232,235,261,263,265,268,280,282,287,289,298,300,304,306,312,314,318,321
TITIN_MOUSE	TITIN_MOUSE_23	811,813,876,878
TITIN_MOUSE	TITIN_MOUSE_24	34449,34450,34456,34463,34466,34469,34475,34480,34481,34487,34489
TITIN_MOUSE	TITIN_MOUSE_25	35096.4
TITIN_MOUSE	TITIN_MOUSE_26	12868.1
TITIN_MOUSE	TITIN_MOUSE_27	15065.2
CEP55_MOUSE	CEP55_MOUSE_0	4,15,19,22
CEP55_MOUSE	CEP55_MOUSE_1	161.162
CEP55_MOUSE	CEP55_MOUSE_2	421,422,425,427,433
SFT2B_MOUSE	SFT2B_MOUSE_0	8.12
ZDHC8_MOUSE	ZDHC8_MOUSE_0	334,337,520,522,533,537,541,572,575,577,600,602,623,626,628
PPIP2_MOUSE	PPIP2_MOUSE_0	322,323,328,332
LARP7_MOUSE	LARP7_MOUSE_0	226,236,239,250,252,255,259,279,280
LARP7_MOUSE	LARP7_MOUSE_1	333.334
EIF3B_MOUSE	EIF3B_MOUSE_0	25,27,30,36,39,44,67,71,73,74,78,80,83,87,89,93
EIF3B_MOUSE	EIF3B_MOUSE_1	140,142,152
THRSP_MOUSE	THRSP_MOUSE_0	42.47
SLIK4_MOUSE	SLIK4_MOUSE_0	735.74
P66A_MOUSE	P66A_MOUSE_0	542.544
P66A_MOUSE	P66A_MOUSE_1	95,102,104,108,109,116,117
P66A_MOUSE	P66A_MOUSE_2	183.184
AK17B_MOUSE	AK17B_MOUSE_0	645,648,670,672,677
AK17B_MOUSE	AK17B_MOUSE_1	750,752,753
S12A2_MOUSE	S12A2_MOUSE_0	257.258
S12A2_MOUSE	S12A2_MOUSE_1	932.936
S12A2_MOUSE	S12A2_MOUSE_2	73.75
3BP5_MOUSE	3BP5_MOUSE_0	377,378,418,420,421,422,423,426
PCIF1_MOUSE	PCIF1_MOUSE_0	7,13,16,18,25,29
PCIF1_MOUSE	PCIF1_MOUSE_1	139,142,143,145,149,151
PDCD5_MOUSE	PDCD5_MOUSE_0	118.125
NOP2_MOUSE	NOP2_MOUSE_0	645.648
BCKD_MOUSE	BCKD_MOUSE_0	355.359
BCKD_MOUSE	BCKD_MOUSE_1	30,31,32,34
DDIT4_MOUSE	DDIT4_MOUSE_0	8.14
SSH2_MOUSE	SSH2_MOUSE_0	8,16,20,24,31,35,37
SSH2_MOUSE	SSH2_MOUSE_1	460,462,485,486
SSH2_MOUSE	SSH2_MOUSE_2	630.632
BRCA1_MOUSE	BRCA1_MOUSE_0	501,502,503
BRCA1_MOUSE	BRCA1_MOUSE_1	702,704,705,709,716
BRCA1_MOUSE	BRCA1_MOUSE_2	182,184,185
BRCA1_MOUSE	BRCA1_MOUSE_3	1136,1142,1149,1151,1153,1196,1198
BRCA1_MOUSE	BRCA1_MOUSE_4	1541,1542,1547
CIPC_MOUSE	CIPC_MOUSE_0	242.245
PLEK_MOUSE	PLEK_MOUSE_0	112,113,116
PLEK_MOUSE	PLEK_MOUSE_1	229.23
TGON2_MOUSE	TGON2_MOUSE_0	27.3
TGON2_MOUSE	TGON2_MOUSE_1	239,240,243,248
NUP88_MOUSE	NUP88_MOUSE_0	34,44,45,46,48,51
TAF3_MOUSE	TAF3_MOUSE_0	198,199,203
TAF3_MOUSE	TAF3_MOUSE_1	496,498,501
I22R1_MOUSE	I22R1_MOUSE_0	409.413
CA052_MOUSE	CA052_MOUSE_0	152.155
KLF9_MOUSE	KLF9_MOUSE_0	225.23
SNX3_MOUSE	SNX3_MOUSE_0	153.154
EPN1_MOUSE	EPN1_MOUSE_0	414,415,417,418,419
EPN1_MOUSE	EPN1_MOUSE_1	452,458,460,468,471
MARH8_MOUSE	MARH8_MOUSE_0	66.7
SRC_MOUSE	SRC_MOUSE_0	11,16,20,33,35,70,73
SRC_MOUSE	SRC_MOUSE_1	97,99,102
PKN1_MOUSE	PKN1_MOUSE_0	341,345,349
PKN1_MOUSE	PKN1_MOUSE_1	62.63
PKN1_MOUSE	PKN1_MOUSE_2	917.919
PKN1_MOUSE	PKN1_MOUSE_3	535,539,575,578,581,594,596,606
NCK5L_MOUSE	NCK5L_MOUSE_0	486,488,493
NCK5L_MOUSE	NCK5L_MOUSE_1	1279,1283,1284
K1C17_MOUSE	K1C17_MOUSE_0	8,11,12,23,24,31,33,38,43
ACOT5_MOUSE	ACOT5_MOUSE_0	51.55
MRE11_MOUSE	MRE11_MOUSE_0	1.3
MRE11_MOUSE	MRE11_MOUSE_1	639,641,647
FCERG_MOUSE	FCERG_MOUSE_0	71,75,77
4ET_MOUSE	4ET_MOUSE_0	69,72,75,76,80
4ET_MOUSE	4ET_MOUSE_1	211,212,213,255,257
4ET_MOUSE	4ET_MOUSE_2	340,343,351,354,355
MFF_MOUSE	MFF_MOUSE_0	111,114,128,130,145,148,150
LTOR1_MOUSE	LTOR1_MOUSE_0	25,26,27,29,39,41,44,54,55
LTOR1_MOUSE	LTOR1_MOUSE_1	68,72,97,99
FLNA_MOUSE	FLNA_MOUSE_0	1956.2
FLNA_MOUSE	FLNA_MOUSE_1	1746.17
FLNA_MOUSE	FLNA_MOUSE_2	2522.25
FLNA_MOUSE	FLNA_MOUSE_3	15,19,22
FLNA_MOUSE	FLNA_MOUSE_4	381.384
FLNA_MOUSE	FLNA_MOUSE_5	2326,2328,2335
FLNA_MOUSE	FLNA_MOUSE_6	2179.22
FLNA_MOUSE	FLNA_MOUSE_7	958,965,967,971,976
NS1BP_MOUSE	NS1BP_MOUSE_0	321,324,325,327,335,337
NS1BP_MOUSE	NS1BP_MOUSE_1	275.276
PP4P1_MOUSE	PP4P1_MOUSE_0	75.79
BRAT1_MOUSE	BRAT1_MOUSE_0	742,745,747
NEUM_MOUSE	NEUM_MOUSE_0	85,87,88,94,95,102,109,121,127,132,137,138,141,143,144,170,171,179,188,191,192
RBM28_MOUSE	RBM28_MOUSE_0	230,238,247,248,251
EIF2D_MOUSE	EIF2D_MOUSE_0	228,237,240
CP7B1_MOUSE	CP7B1_MOUSE_0	379.381
BCLA3_MOUSE	BCLA3_MOUSE_0	77.79
BCLA3_MOUSE	BCLA3_MOUSE_1	591.593
CACB4_MOUSE	CACB4_MOUSE_0	37,40,41,49,58,60,63
CACB4_MOUSE	CACB4_MOUSE_1	403,404,405,406,409
SAM9L_MOUSE	SAM9L_MOUSE_0	369.371
AKAP4_MOUSE	AKAP4_MOUSE_0	742.746
AKAP4_MOUSE	AKAP4_MOUSE_1	575.578
AKAP4_MOUSE	AKAP4_MOUSE_2	443.446
AKAP4_MOUSE	AKAP4_MOUSE_3	503.505
HNRL2_MOUSE	HNRL2_MOUSE_0	158,162,165,182,185,190,221,223,225
KCNQ5_MOUSE	KCNQ5_MOUSE_0	447,449,457,459,466
AT8B2_MOUSE	AT8B2_MOUSE_0	1168,1173,1180,1181,1186,1192,1194
ESCO2_MOUSE	ESCO2_MOUSE_0	40,49,50,57,59,67
KNDC1_MOUSE	KNDC1_MOUSE_0	950.952
GP156_MOUSE	GP156_MOUSE_0	330,332,333
NCBP1_MOUSE	NCBP1_MOUSE_0	6,7,20,21,26,32
C2CD2_MOUSE	C2CD2_MOUSE_0	500,505,506
C2CD2_MOUSE	C2CD2_MOUSE_1	646.648
C2CD2_MOUSE	C2CD2_MOUSE_2	425,429,433,435,439
NOS3_MOUSE	NOS3_MOUSE_0	1173,1175,1177
NOS3_MOUSE	NOS3_MOUSE_1	631,632,634
NCBP3_MOUSE	NCBP3_MOUSE_0	381,383,407,409,493,494
NCBP3_MOUSE	NCBP3_MOUSE_1	208.209
MP2K2_MOUSE	MP2K2_MOUSE_0	292.294
MP2K2_MOUSE	MP2K2_MOUSE_1	22,24,25,29
MP2K2_MOUSE	MP2K2_MOUSE_2	393,394,396
KIF12_MOUSE	KIF12_MOUSE_0	598.604
MBOA7_MOUSE	MBOA7_MOUSE_0	458.463
CPSF4_MOUSE	CPSF4_MOUSE_0	168,171,172
GLI3_MOUSE	GLI3_MOUSE_0	657,659,661
ACHA4_MOUSE	ACHA4_MOUSE_0	525,528,529,539,542
FMNL1_MOUSE	FMNL1_MOUSE_0	1017.1
FMNL1_MOUSE	FMNL1_MOUSE_1	177,183,188,201,205,209,216
FMNL1_MOUSE	FMNL1_MOUSE_2	508.51
SDK2_MOUSE	SDK2_MOUSE_0	2002,2006,2017,2022,2025,2029
AKT3_MOUSE	AKT3_MOUSE_0	471,472,473,475
BRSK1_MOUSE	BRSK1_MOUSE_0	426,431,440,441,442,446,449,453,471,472,498,499,507,510,511,514,518,526,528,530,533,534,538,550,554,558,562,574,582,585,586
CLK1_MOUSE	CLK1_MOUSE_0	335,336,339,340
CLK1_MOUSE	CLK1_MOUSE_1	136.138
NAA30_MOUSE	NAA30_MOUSE_0	191,194,197
UBS3B_MOUSE	UBS3B_MOUSE_0	7,8,11
E2F5_MOUSE	E2F5_MOUSE_0	48.49
HMHA1_MOUSE	HMHA1_MOUSE_0	562,567,576,583,590,597,598
HMHA1_MOUSE	HMHA1_MOUSE_1	1012,1016,1019,1021,1027,1031,1032,1033,1036
HMHA1_MOUSE	HMHA1_MOUSE_2	874.876
HMHA1_MOUSE	HMHA1_MOUSE_3	91,94,97
KCRM_MOUSE	KCRM_MOUSE_0	139.14
SUGP2_MOUSE	SUGP2_MOUSE_0	902.905
SUGP2_MOUSE	SUGP2_MOUSE_1	731,732,739,743
S39A6_MOUSE	S39A6_MOUSE_0	166,167,172,191,194
S39A6_MOUSE	S39A6_MOUSE_1	475,482,484,487,488,501,507,511
LATS1_MOUSE	LATS1_MOUSE_0	203,206,215,217
LATS1_MOUSE	LATS1_MOUSE_1	609,610,611
MTF2_MOUSE	MTF2_MOUSE_0	24.26
HYPDH_MOUSE	HYPDH_MOUSE_0	331.333
HYPDH_MOUSE	HYPDH_MOUSE_1	183.186
CDK15_MOUSE	CDK15_MOUSE_0	35,46,47
PACR_MOUSE	PACR_MOUSE_0	486.487
BAZ2A_MOUSE	BAZ2A_MOUSE_0	1168,1171,1172,1173,1177
BAZ2A_MOUSE	BAZ2A_MOUSE_1	1373,1376,1382,1384
BAZ2A_MOUSE	BAZ2A_MOUSE_2	133.134
CCDC6_MOUSE	CCDC6_MOUSE_0	232,236,241,246,315,317,319,320,341,343,344,348,351,353,359,363,364,366,372
UNC80_MOUSE	UNC80_MOUSE_0	1539.15
UNC80_MOUSE	UNC80_MOUSE_1	1011.1
UNC80_MOUSE	UNC80_MOUSE_2	3044.3
UNC80_MOUSE	UNC80_MOUSE_3	1812.18
UNC80_MOUSE	UNC80_MOUSE_4	414,422,424
NU155_MOUSE	NU155_MOUSE_0	599,602,603,604,605,609,611,613,617,618,621,623
NU155_MOUSE	NU155_MOUSE_1	991.993
NBN_MOUSE	NBN_MOUSE_0	426,428,432
KCRB_MOUSE	KCRB_MOUSE_0	3.8
SC6A1_MOUSE	SC6A1_MOUSE_0	590.593
SC6A1_MOUSE	SC6A1_MOUSE_1	13,14,17
UCHL3_MOUSE	UCHL3_MOUSE_0	127.129
U5S1_MOUSE	U5S1_MOUSE_0	2.5
ATF4_MOUSE	ATF4_MOUSE_0	211,217,222,229,233,246,250,253
HAP28_MOUSE	HAP28_MOUSE_0	16,17,18
HAP28_MOUSE	HAP28_MOUSE_1	56,59,62
HAP28_MOUSE	HAP28_MOUSE_2	167,169,175,177
ASF1A_MOUSE	ASF1A_MOUSE_0	164.165
NFAC3_MOUSE	NFAC3_MOUSE_0	159.162
NFAC3_MOUSE	NFAC3_MOUSE_1	276,277,285,287,291
CH60_MOUSE	CH60_MOUSE_0	408.409
CH60_MOUSE	CH60_MOUSE_1	374,380,381,382
CLIP2_MOUSE	CLIP2_MOUSE_0	292,293,294
CLIP2_MOUSE	CLIP2_MOUSE_1	352,354,355,497,498
CLIP2_MOUSE	CLIP2_MOUSE_2	49,52,54
CLIP2_MOUSE	CLIP2_MOUSE_3	202,204,207,211
CTDP1_MOUSE	CTDP1_MOUSE_0	765,767,829,831
CTDP1_MOUSE	CTDP1_MOUSE_1	928,929,932,933
CTDP1_MOUSE	CTDP1_MOUSE_2	724.729
GLI2_MOUSE	GLI2_MOUSE_0	83.87
GLI2_MOUSE	GLI2_MOUSE_1	706.707
NGN3_MOUSE	NGN3_MOUSE_0	182.186
MCEM1_MOUSE	MCEM1_MOUSE_0	40.43
C2CD3_MOUSE	C2CD3_MOUSE_0	333,337,342
C2CD3_MOUSE	C2CD3_MOUSE_1	1141.11
ZC3H3_MOUSE	ZC3H3_MOUSE_0	369,378,379
ZC3H3_MOUSE	ZC3H3_MOUSE_1	850.854
CCD25_MOUSE	CCD25_MOUSE_0	186,187,195,203
TM1L2_MOUSE	TM1L2_MOUSE_0	472,478,481
TM1L2_MOUSE	TM1L2_MOUSE_1	393,400,403
TM1L2_MOUSE	TM1L2_MOUSE_2	159.163
VATG2_MOUSE	VATG2_MOUSE_0	2.4
H11_MOUSE	H11_MOUSE_0	1,3,11,12,14
H11_MOUSE	H11_MOUSE_1	56.59
RL28_MOUSE	RL28_MOUSE_0	90.91
ADAS_MOUSE	ADAS_MOUSE_0	51,56,60,66
SRSF4_MOUSE	SRSF4_MOUSE_0	178,184,185,187
SRSF4_MOUSE	SRSF4_MOUSE_1	288,290,296,302,314,316,320
SRSF4_MOUSE	SRSF4_MOUSE_2	398,400,402,404,406,438,440,441,442,444,452,454
SC5A3_MOUSE	SC5A3_MOUSE_0	669.672
SC5A3_MOUSE	SC5A3_MOUSE_1	547,550,553,558,564
SC5A3_MOUSE	SC5A3_MOUSE_2	590.593
MBD2_MOUSE	MBD2_MOUSE_0	133.135
MBD2_MOUSE	MBD2_MOUSE_1	183.185
HXC6_MOUSE	HXC6_MOUSE_0	199.202
PTN22_MOUSE	PTN22_MOUSE_0	496.497
MARCS_MOUSE	MARCS_MOUSE_0	14,25,26,28
MARCS_MOUSE	MARCS_MOUSE_1	111,112,121,123,124,125,126,127,137,139,140,142,151,155,159,162,166,170
RSRC1_MOUSE	RSRC1_MOUSE_0	4,5,7
STAU2_MOUSE	STAU2_MOUSE_0	485,487,488
STX5_MOUSE	STX5_MOUSE_0	8.11
ZBBX_MOUSE	ZBBX_MOUSE_0	691.693
ZBBX_MOUSE	ZBBX_MOUSE_1	364,365,366
KCTD3_MOUSE	KCTD3_MOUSE_0	608.612
KCTD3_MOUSE	KCTD3_MOUSE_1	790.792
RTL9_MOUSE	RTL9_MOUSE_0	642,644,683,684,753,755,758
PEX10_MOUSE	PEX10_MOUSE_0	253,257,258
SYSC_MOUSE	SYSC_MOUSE_0	254,257,261,262
CK096_MOUSE	CK096_MOUSE_0	216.219
TCF20_MOUSE	TCF20_MOUSE_0	1219,1222,1223
TCF20_MOUSE	TCF20_MOUSE_1	1545.15
TCF20_MOUSE	TCF20_MOUSE_2	1782,1784,1787,1789,1791
TCF20_MOUSE	TCF20_MOUSE_3	481,482,484,487,488
TCF20_MOUSE	TCF20_MOUSE_4	586,587,589,600,601,602,605,611,617
TCF20_MOUSE	TCF20_MOUSE_5	729.732
PICK1_MOUSE	PICK1_MOUSE_0	376.378
NPDC1_MOUSE	NPDC1_MOUSE_0	226,235,237,238,242,255,257
ENTR1_MOUSE	ENTR1_MOUSE_0	237,240,244
ABCB5_MOUSE	ABCB5_MOUSE_0	671.672
RBGPR_MOUSE	RBGPR_MOUSE_0	558.565
TIMD4_MOUSE	TIMD4_MOUSE_0	322,324,330
ALS2_MOUSE	ALS2_MOUSE_0	457,458,459,476,482,485
ALS2_MOUSE	ALS2_MOUSE_1	1445,1451,1453,1455,1457,1462
MSRE_MOUSE	MSRE_MOUSE_0	21,22,24,31,33,35,39,40
MSRE_MOUSE	MSRE_MOUSE_1	332.334
NDRG3_MOUSE	NDRG3_MOUSE_0	317,319,321,326,328,330,331,332,333,334,337,340,345,351,354,357,360
SMAD9_MOUSE	SMAD9_MOUSE_0	426,427,429
NKAPL_MOUSE	NKAPL_MOUSE_0	22.24
SYTL4_MOUSE	SYTL4_MOUSE_0	199,201,204,205
SYTL4_MOUSE	SYTL4_MOUSE_1	294.296
CEP89_MOUSE	CEP89_MOUSE_0	39.43
ANKZ1_MOUSE	ANKZ1_MOUSE_0	85.87
ZC3HD_MOUSE	ZC3HD_MOUSE_0	108,109,115
ZC3HD_MOUSE	ZC3HD_MOUSE_1	206,208,210,214,217
ZC3HD_MOUSE	ZC3HD_MOUSE_2	262.264
ZC3HD_MOUSE	ZC3HD_MOUSE_3	315,317,323,326,327,334,344,346,352,354,356,357,362,364,368,370,372,374,378,379,385,391
ZC3HD_MOUSE	ZC3HD_MOUSE_4	487.489
ZC3HD_MOUSE	ZC3HD_MOUSE_5	702,703,906,908,912,920,923,925,926,928,950,952,954
ZC3HD_MOUSE	ZC3HD_MOUSE_6	1085,1089,1092
ZC3HD_MOUSE	ZC3HD_MOUSE_7	1272,1274,1277,1281
ZC3HD_MOUSE	ZC3HD_MOUSE_8	1441.14
NIPA_MOUSE	NIPA_MOUSE_0	327,331,333,336,339,342,348,350,352,355,356,357
NIPA_MOUSE	NIPA_MOUSE_1	379,382,392,393,405,406,407,408,409,411,412
NIPA_MOUSE	NIPA_MOUSE_2	23,27,54,57,61,67
UACA_MOUSE	UACA_MOUSE_0	872.875
SPHK1_MOUSE	SPHK1_MOUSE_0	224.225
SRRT_MOUSE	SRRT_MOUSE_0	538,542,547,548
LRC45_MOUSE	LRC45_MOUSE_0	532.537
IL1AP_MOUSE	IL1AP_MOUSE_0	564.565
H3C_MOUSE	H3C_MOUSE_0	41.45
RHG31_MOUSE	RHG31_MOUSE_0	1237.12
RHG31_MOUSE	RHG31_MOUSE_1	381,383,384,445,447
RHG31_MOUSE	RHG31_MOUSE_2	651,657,665,666,671
RHG31_MOUSE	RHG31_MOUSE_3	849.851
RHG31_MOUSE	RHG31_MOUSE_4	1091,1092,1097
PITM1_MOUSE	PITM1_MOUSE_0	1231,1233,1235
PITM1_MOUSE	PITM1_MOUSE_1	281,282,286,299,303,315,318,325,328,341,344,345
PITM1_MOUSE	PITM1_MOUSE_2	663.666
AFAP1_MOUSE	AFAP1_MOUSE_0	546,548,553
AFAP1_MOUSE	AFAP1_MOUSE_1	664,665,668,675,679,682,683,687
AFAP1_MOUSE	AFAP1_MOUSE_2	277,278,282,283,341,342,343
INT6L_MOUSE	INT6L_MOUSE_0	625.627
SEC13_MOUSE	SEC13_MOUSE_0	2,9,10
SEC13_MOUSE	SEC13_MOUSE_1	308,310,312
SC16B_MOUSE	SC16B_MOUSE_0	859,862,865,873,874,947,949
SC16B_MOUSE	SC16B_MOUSE_1	33.36
SC16B_MOUSE	SC16B_MOUSE_2	105.107
SC16B_MOUSE	SC16B_MOUSE_3	181,184,186
PIGR_MOUSE	PIGR_MOUSE_0	679,681,682
PIGR_MOUSE	PIGR_MOUSE_1	740,741,750
MT1_MOUSE	MT1_MOUSE_0	5.7
ACSS3_MOUSE	ACSS3_MOUSE_0	202.203
TNC18_MOUSE	TNC18_MOUSE_0	1661.17
TNC18_MOUSE	TNC18_MOUSE_1	1844.18
TNC18_MOUSE	TNC18_MOUSE_2	622,625,626
TNC18_MOUSE	TNC18_MOUSE_3	916,920,924,927
TNC18_MOUSE	TNC18_MOUSE_4	2494,2495,2496,2498,2499,2500,2502,2504,2505,2507,2508,2509,2510,2512,2513,2514,2515,2516
DAPK2_MOUSE	DAPK2_MOUSE_0	348,350,366,367,368,369
SLTM_MOUSE	SLTM_MOUSE_0	70,73,79
SLTM_MOUSE	SLTM_MOUSE_1	343.344
SLTM_MOUSE	SLTM_MOUSE_2	541,548,549,551
SLTM_MOUSE	SLTM_MOUSE_3	811,815,820,822
RAD9B_MOUSE	RAD9B_MOUSE_0	350,353,360,362
DDX3Y_MOUSE	DDX3Y_MOUSE_0	69,70,71,74
FA83D_MOUSE	FA83D_MOUSE_0	359,362,363,453,457
F122A_MOUSE	F122A_MOUSE_0	31,33,41,44,58,59
F122A_MOUSE	F122A_MOUSE_1	118,120,139,143,145,169,173,176,183,185
F122A_MOUSE	F122A_MOUSE_2	258,259,260,261,263,266,272
SHAN1_MOUSE	SHAN1_MOUSE_0	1257,1262,1263
SHAN1_MOUSE	SHAN1_MOUSE_1	2080,2082,2088
SHAN1_MOUSE	SHAN1_MOUSE_2	23.25
SHAN1_MOUSE	SHAN1_MOUSE_3	60.62
SHAN1_MOUSE	SHAN1_MOUSE_4	412.415
SHAN1_MOUSE	SHAN1_MOUSE_5	782,787,790
CAC1C_MOUSE	CAC1C_MOUSE_0	1687.17
CAC1C_MOUSE	CAC1C_MOUSE_1	468.475
CAC1C_MOUSE	CAC1C_MOUSE_2	2014.2
TTF1_MOUSE	TTF1_MOUSE_0	436,438,440,450,456,459
BIG2_MOUSE	BIG2_MOUSE_0	213,217,223,226
BIG2_MOUSE	BIG2_MOUSE_1	352,354,355
BIG2_MOUSE	BIG2_MOUSE_2	1517,1519,1520,1526,1531,1534,1540
BIG2_MOUSE	BIG2_MOUSE_3	620,622,623,626,627,632
DHX34_MOUSE	DHX34_MOUSE_0	748.749
APBB2_MOUSE	APBB2_MOUSE_0	408.411
APBB2_MOUSE	APBB2_MOUSE_1	329,333,338,340,342
CD22_MOUSE	CD22_MOUSE_0	668,670,671
CD22_MOUSE	CD22_MOUSE_1	739,740,743
UBXN6_MOUSE	UBXN6_MOUSE_0	314,315,318
PPM1A_MOUSE	PPM1A_MOUSE_0	372,374,376,377
PP4R1_MOUSE	PP4R1_MOUSE_0	481.485
PP4R1_MOUSE	PP4R1_MOUSE_1	945.947
FR1OP_MOUSE	FR1OP_MOUSE_0	206,208,210,212
ANXA2_MOUSE	ANXA2_MOUSE_0	17,18,21,23,25
RAB3A_MOUSE	RAB3A_MOUSE_0	6,13,14
RAB3A_MOUSE	RAB3A_MOUSE_1	187.189
ARGI1_MOUSE	ARGI1_MOUSE_0	2.6
CERS6_MOUSE	CERS6_MOUSE_0	340,344,345,346
DNJC5_MOUSE	DNJC5_MOUSE_0	7,9,10,11,14,16
SL9A1_MOUSE	SL9A1_MOUSE_0	696,698,700,706,711,721,726,729,732
SL9A1_MOUSE	SL9A1_MOUSE_1	770,774,775,778,783,786,787,789,791,792,800
TB10B_MOUSE	TB10B_MOUSE_0	135,137,139
TB10B_MOUSE	TB10B_MOUSE_1	641,642,643,646,649
TB10B_MOUSE	TB10B_MOUSE_2	692,694,697,698
CEND_MOUSE	CEND_MOUSE_0	6,8,9,14
CEND_MOUSE	CEND_MOUSE_1	88,89,93,94
DGKQ_MOUSE	DGKQ_MOUSE_0	10,14,16,21,25
SEC62_MOUSE	SEC62_MOUSE_0	306,308,312,314,334,340,342,344,352,355,356
SEC62_MOUSE	SEC62_MOUSE_1	149,154,157
GBRA6_MOUSE	GBRA6_MOUSE_0	374.375
PP16B_MOUSE	PP16B_MOUSE_0	500,504,505
PHLB1_MOUSE	PHLB1_MOUSE_0	184,187,191,218,219,222
PHLB1_MOUSE	PHLB1_MOUSE_1	373,377,381,386
PHLB1_MOUSE	PHLB1_MOUSE_2	419.421
PHLB1_MOUSE	PHLB1_MOUSE_3	462,464,466,471
PHLB1_MOUSE	PHLB1_MOUSE_4	501,502,517,519,521,523,527,534,536,540,544,547,552,556,564,565,579,581,584
PHLB1_MOUSE	PHLB1_MOUSE_5	682,686,696,697,700
PHLB1_MOUSE	PHLB1_MOUSE_6	1006.1
DACT3_MOUSE	DACT3_MOUSE_0	159,164,169,171
DACT3_MOUSE	DACT3_MOUSE_1	201,202,214,216,225,229
DACT3_MOUSE	DACT3_MOUSE_2	408,410,455,456
DACT3_MOUSE	DACT3_MOUSE_3	495.497
D19L1_MOUSE	D19L1_MOUSE_0	18,21,22,27,30,42,45
AGO1_MOUSE	AGO1_MOUSE_0	821,825,828
CC189_MOUSE	CC189_MOUSE_0	32.33
TAF9B_MOUSE	TAF9B_MOUSE_0	146,149,150,153,154
TISD_MOUSE	TISD_MOUSE_0	476,479,481
TISD_MOUSE	TISD_MOUSE_1	56,58,69,72
CTR2_MOUSE	CTR2_MOUSE_0	462.465
MP2K1_MOUSE	MP2K1_MOUSE_0	384,385,387
MP2K1_MOUSE	MP2K1_MOUSE_1	285,291,297
COHA1_MOUSE	COHA1_MOUSE_0	84,87,92,148,150,170,174
PDE3B_MOUSE	PDE3B_MOUSE_0	257,258,272,273,276
PDE3B_MOUSE	PDE3B_MOUSE_1	577.58
PDE3B_MOUSE	PDE3B_MOUSE_2	535,537,538
PDE3B_MOUSE	PDE3B_MOUSE_3	419,420,423,424
PDE3B_MOUSE	PDE3B_MOUSE_4	503,506,511
PDE3B_MOUSE	PDE3B_MOUSE_5	549.551
TRPC4_MOUSE	TRPC4_MOUSE_0	958.962
CDC27_MOUSE	CDC27_MOUSE_0	364,366,369,378,379
CSKI1_MOUSE	CSKI1_MOUSE_0	416,419,422,426,431
CSKI1_MOUSE	CSKI1_MOUSE_1	887,890,892
CSKI1_MOUSE	CSKI1_MOUSE_2	1066.11
CSKI1_MOUSE	CSKI1_MOUSE_3	1243.12
ACAP2_MOUSE	ACAP2_MOUSE_0	377,378,380,381,383,386
ACAP2_MOUSE	ACAP2_MOUSE_1	729.733
ACAP2_MOUSE	ACAP2_MOUSE_2	520.522
ACAP2_MOUSE	ACAP2_MOUSE_3	572,575,577
CRKL_MOUSE	CRKL_MOUSE_0	183,184,194,196,197,206,211,212,213,217,220,221
CRKL_MOUSE	CRKL_MOUSE_1	104,106,111,113
HMGB1_MOUSE	HMGB1_MOUSE_0	50.52
HMGC2_MOUSE	HMGC2_MOUSE_0	147.149
ZRAB2_MOUSE	ZRAB2_MOUSE_0	113,119,123
ZRAB2_MOUSE	ZRAB2_MOUSE_1	180,182,187,192,278,279,287,289,292,293
NCF1_MOUSE	NCF1_MOUSE_0	315,320,323,328
BC11A_MOUSE	BC11A_MOUSE_0	204.207
BC11A_MOUSE	BC11A_MOUSE_1	699,700,717,721,725,734
BC11A_MOUSE	BC11A_MOUSE_2	326,327,331,336
BC11A_MOUSE	BC11A_MOUSE_3	430,431,445,446
BC11A_MOUSE	BC11A_MOUSE_4	624,626,629
PWP1_MOUSE	PWP1_MOUSE_0	483,485,490,492
FER_MOUSE	FER_MOUSE_0	714.715
FER_MOUSE	FER_MOUSE_1	401,407,409,410,418,422,426,433
E41L3_MOUSE	E41L3_MOUSE_0	415,416,423,427,450,455,457,463,469,475,478,485,487,492,494
E41L3_MOUSE	E41L3_MOUSE_1	541,542,544,546
E41L3_MOUSE	E41L3_MOUSE_2	583,584,598,599,600,622,625,626
E41L3_MOUSE	E41L3_MOUSE_3	724,726,738,739,797,798,801,803
E41L3_MOUSE	E41L3_MOUSE_4	62.63
E41L3_MOUSE	E41L3_MOUSE_5	95,98,104,106
CTSRZ_MOUSE	CTSRZ_MOUSE_0	23,31,32
TTYH1_MOUSE	TTYH1_MOUSE_0	323.326
TTYH1_MOUSE	TTYH1_MOUSE_1	422,428,439,447,448
TARA_MOUSE	TARA_MOUSE_0	1590,1593,1597,1602,1603
APTX_MOUSE	APTX_MOUSE_0	122,126,133,142
U2AF1_MOUSE	U2AF1_MOUSE_0	58.6
U2AF1_MOUSE	U2AF1_MOUSE_1	229.235
FOXA2_MOUSE	FOXA2_MOUSE_0	301,307,309
EP15R_MOUSE	EP15R_MOUSE_0	228,234,237,238,240,243,245,249,250,252,254
EP15R_MOUSE	EP15R_MOUSE_1	106,107,114
EP15R_MOUSE	EP15R_MOUSE_2	352,359,363,370,371,374
EP15R_MOUSE	EP15R_MOUSE_3	479,483,486
INT13_MOUSE	INT13_MOUSE_0	622.625
CSF3R_MOUSE	CSF3R_MOUSE_0	783.787
TSC1_MOUSE	TSC1_MOUSE_0	1073,1076,1077,1093,1095,1128,1130
TSC1_MOUSE	TSC1_MOUSE_1	385,387,393
TSC1_MOUSE	TSC1_MOUSE_2	501,504,507,509,511,515,517
GIT2_MOUSE	GIT2_MOUSE_0	376,380,382,390,392,395,399,448,454,458,462,464,503,504,505,506,507,510,516,518,527,534,535,538,540
GIT2_MOUSE	GIT2_MOUSE_1	582.584
INO1_MOUSE	INO1_MOUSE_0	522.523
B9D1_MOUSE	B9D1_MOUSE_0	182.184
PRR11_MOUSE	PRR11_MOUSE_0	284.286
PRR11_MOUSE	PRR11_MOUSE_1	360.362
UNC5B_MOUSE	UNC5B_MOUSE_0	486,488,491
UNC5B_MOUSE	UNC5B_MOUSE_1	525,527,530
VIME_MOUSE	VIME_MOUSE_0	418,419,425,429,435,437,457,458
VIME_MOUSE	VIME_MOUSE_1	4,6,7,8,9,17,20,21,24,25,28,33,37,38,41,46,47,48,50,52,53,54,55,60,62,64,65,71,72
VIME_MOUSE	VIME_MOUSE_2	408.411
[truncated: 7,961 more rows]

## Sheet: R table
Dataset	aacid_X1_ancestral	aacid_X2_desc	#(pX1->X2)	sum_i(#(pX1->Xi))	#(X1->X2)	sum_i(#(X1->Xi))	P(pX1->X2)	P(X1->X2)	R(X1 -> X2)	p_value_bonf
HMR_DR_ALL	S	D	303	14753	11015	677059	0.020538	0.016269	1.262421	0.001563498452006484
HMR_DR_ALL	S	E	305	14753	8049	677059	0.020674	0.011888	1.739018	5.220878296972477e-20
HMR_DR_ALL	S	N	1733	14753	88550	677059	0.117468	0.130786	0.898165	0.0005589891990341183
HMR_DR_ALL	S	Q	212	14753	7024	677059	0.01437	0.010374	1.385152	7.271379967090348e-05
HMR_DR_ALL	S	K	253	14753	8806	677059	0.017149	0.013006	1.318524	0.00035989219882181654
HMR_DR_ALL	S	R	702	14753	37636	677059	0.047584	0.055587	0.856012	0.0013481562621095317
HMR_DR_ALL	S	H	212	14753	9936	677059	0.01437	0.014675	0.979198	15.013033855109576
HMR_DR_ALL	S	G	1879	14753	92192	677059	0.127364	0.136165	0.935362	0.13622668135866237
HMR_DR_ALL	S	A	1863	14753	85952	677059	0.126279	0.126949	0.994725	15.982057571074222
HMR_DR_ALL	S	V	288	14753	11376	677059	0.019521	0.016802	1.161847	0.2639096678257901
HMR_DR_ALL	S	L	1092	14753	45884	677059	0.074019	0.06777	1.092214	0.1083793081361645
HMR_DR_ALL	S	I	287	14753	12874	677059	0.019454	0.019015	1.023092	13.823194522768054
HMR_DR_ALL	S	F	528	14753	24555	677059	0.035789	0.036267	0.986825	14.897314976082294
HMR_DR_ALL	S	W	76	14753	3329	677059	0.005151	0.004917	1.047722	13.92324155090665
HMR_DR_ALL	S	M	94	14753	2794	677059	0.006372	0.004127	1.544001	0.0007939373372049916
HMR_DR_ALL	S	C	714	14753	32230	677059	0.048397	0.047603	1.01668	12.989377018976462
HMR_DR_ALL	S	P	2174	14753	108203	677059	0.14736	0.159813	0.922075	0.009323478480467816
HMR_DR_ALL	S	T	1843	14753	78841	677059	0.124924	0.116446	1.072802	0.0971804678523284
HMR_DR_ALL	S	Y	195	14753	7813	677059	0.013218	0.01154	1.145415	1.2977648126111214
HMR_DR_ALL	T	D	43	4332	3438	439642	0.009926	0.00782	1.269326	2.7220665327730003
HMR_DR_ALL	T	E	49	4332	5056	439642	0.011311	0.0115	0.983557	18.344661137342978
HMR_DR_ALL	T	N	150	4332	17501	439642	0.034626	0.039807	0.869839	1.9426334363121485
HMR_DR_ALL	T	Q	37	4332	3339	439642	0.008541	0.007595	1.124595	10.171298167310134
HMR_DR_ALL	T	K	95	4332	11676	439642	0.02193	0.026558	0.825734	1.3837424876484163
HMR_DR_ALL	T	R	83	4332	11168	439642	0.01916	0.025402	0.754247	0.23902993074237094
HMR_DR_ALL	T	H	30	4332	2323	439642	0.006925	0.005284	1.310638	3.263548125770046
HMR_DR_ALL	T	G	73	4332	7235	439642	0.016851	0.016457	1.023988	16.886445916818495
HMR_DR_ALL	T	A	1334	4332	143396	439642	0.307941	0.326165	0.944125	1.3286426724472786
HMR_DR_ALL	T	V	157	4332	19435	439642	0.036242	0.044206	0.819834	0.30978093846288113
HMR_DR_ALL	T	L	114	4332	9175	439642	0.026316	0.020869	1.260984	0.3278166365242893
HMR_DR_ALL	T	I	370	4332	48212	439642	0.085411	0.109662	0.778856	8.67726933572108e-05
HMR_DR_ALL	T	F	23	4332	1825	439642	0.005309	0.004151	1.279015	4.456020226637628
HMR_DR_ALL	T	W	11	4332	546	439642	0.002539	0.001242	2.044611	0.5158863589492516
HMR_DR_ALL	T	M	229	4332	28753	439642	0.052862	0.065401	0.808282	0.036608527487951015
HMR_DR_ALL	T	C	23	4332	1659	439642	0.005309	0.003774	1.406994	2.004330886857245
HMR_DR_ALL	T	P	430	4332	45448	439642	0.099261	0.103375	0.960206	8.335037058455269
HMR_DR_ALL	T	S	1073	4332	78564	439642	0.247692	0.1787	1.386075	2.8379595890457234e-20
HMR_DR_ALL	T	Y	8	4332	893	439642	0.001847	0.002031	0.909179	19.0
HMR_DR_ALL	Y	D	31	721	2782	58957	0.042996	0.047187	0.911181	12.87099547619587
HMR_DR_ALL	Y	E	15	721	588	58957	0.020804	0.009973	2.085999	0.24808145417619273
HMR_DR_ALL	Y	N	16	721	2590	58957	0.022191	0.04393	0.50515	0.15147258326435756
HMR_DR_ALL	Y	Q	12	721	893	58957	0.016644	0.015147	1.098828	14.396649496423398
HMR_DR_ALL	Y	K	6	721	432	58957	0.008322	0.007327	1.13571	12.530584680571474
HMR_DR_ALL	Y	R	32	721	1334	58957	0.044383	0.022627	1.961527	0.012971541072251909
HMR_DR_ALL	Y	H	130	721	12672	58957	0.180305	0.214936	0.838877	1.391680744319695
HMR_DR_ALL	Y	G	16	721	926	58957	0.022191	0.015706	1.412892	3.3247676789925764
HMR_DR_ALL	Y	A	14	721	766	58957	0.019417	0.012993	1.494512	2.6036348812624652
HMR_DR_ALL	Y	V	12	721	681	58957	0.016644	0.011551	1.440901	4.130335217269805
HMR_DR_ALL	Y	L	27	721	2108	58957	0.037448	0.035755	1.047353	16.977203433408697
HMR_DR_ALL	Y	I	19	721	652	58957	0.026352	0.011059	2.382902	0.01912335488384072
HMR_DR_ALL	Y	F	140	721	11075	58957	0.194175	0.187849	1.033676	14.382973453767846
HMR_DR_ALL	Y	W	11	721	612	58957	0.015257	0.01038	1.469743	3.7167203741241197
HMR_DR_ALL	Y	M	4	721	228	58957	0.005548	0.003867	1.434582	6.9994291203893635
HMR_DR_ALL	Y	C	130	721	12732	58957	0.180305	0.215954	0.834924	1.2470722315537197
HMR_DR_ALL	Y	P	15	721	1159	58957	0.020804	0.019658	1.058298	14.949139827159126
HMR_DR_ALL	Y	S	79	721	6029	58957	0.10957	0.102261	1.071475	11.490093429331523
HMR_DR_ALL	Y	T	12	721	698	58957	0.016644	0.011839	1.405808	4.295136380577336
HMR_DR_ISL	S	D	168	7195	11150	684617	0.02335	0.016286	1.433677	9.730903403430092e-05
HMR_DR_ISL	S	E	180	7195	8174	684617	0.025017	0.01194	2.095341	1.1144995231725913e-21
HMR_DR_ISL	S	N	835	7195	89448	684617	0.116053	0.130654	0.888245	0.025166334025442393
HMR_DR_ISL	S	Q	118	7195	7118	684617	0.0164	0.010397	1.577397	2.2870391181151934e-05
HMR_DR_ISL	S	K	128	7195	8931	684617	0.01779	0.013045	1.363725	0.012064686067548343
HMR_DR_ISL	S	R	340	7195	37998	684617	0.047255	0.055503	0.851403	0.07979546213379783
HMR_DR_ISL	S	H	102	7195	10046	684617	0.014177	0.014674	0.966104	14.594696044415947
HMR_DR_ISL	S	G	926	7195	93145	684617	0.1287	0.136054	0.94595	2.226675800029937
HMR_DR_ISL	S	A	893	7195	86922	684617	0.124114	0.126964	0.977549	10.181711492295713
HMR_DR_ISL	S	V	144	7195	11520	684617	0.020014	0.016827	1.189397	0.8548423772289537
HMR_DR_ISL	S	L	548	7195	46428	684617	0.076164	0.067816	1.123098	0.18635988215419394
HMR_DR_ISL	S	I	151	7195	13010	684617	0.020987	0.019003	1.104375	4.693552164862433
HMR_DR_ISL	S	F	238	7195	24845	684617	0.033079	0.03629	0.911496	3.2513622984761836
HMR_DR_ISL	S	W	38	7195	3367	684617	0.005281	0.004918	1.073884	13.782728483149233
HMR_DR_ISL	S	M	48	7195	2840	684617	0.006671	0.004148	1.608199	0.026814762909873432
HMR_DR_ISL	S	C	328	7195	32616	684617	0.045587	0.047641	0.956886	8.624278591059563
HMR_DR_ISL	S	P	1005	7195	109372	684617	0.13968	0.159756	0.874333	0.0014465277131814685
HMR_DR_ISL	S	T	925	7195	79759	684617	0.128562	0.116502	1.103517	0.10111750815755725
HMR_DR_ISL	S	Y	80	7195	7928	684617	0.011119	0.01158	0.960159	14.455019110327301
HMR_DR_ISL	T	D	25	2574	3456	441400	0.009713	0.00783	1.240481	6.417821141526694
HMR_DR_ISL	T	E	25	2574	5080	441400	0.009713	0.011509	0.843918	8.60539295369737
HMR_DR_ISL	T	N	86	2574	17565	441400	0.033411	0.039794	0.839603	2.337230186042567
HMR_DR_ISL	T	Q	26	2574	3350	441400	0.010101	0.007589	1.330921	2.6565711639707974
HMR_DR_ISL	T	K	60	2574	11711	441400	0.02331	0.026531	0.878579	6.716951238878791
HMR_DR_ISL	T	R	47	2574	11204	441400	0.01826	0.025383	0.719364	0.5557080485218953
HMR_DR_ISL	T	H	18	2574	2335	441400	0.006993	0.00529	1.321933	4.189022991249534
HMR_DR_ISL	T	G	39	2574	7269	441400	0.015152	0.016468	0.920055	12.5732917660343
HMR_DR_ISL	T	A	822	2574	143908	441400	0.319347	0.326026	0.979514	11.788691357217173
HMR_DR_ISL	T	V	95	2574	19497	441400	0.036908	0.044171	0.835564	1.805693173703768
HMR_DR_ISL	T	L	60	2574	9229	441400	0.02331	0.020908	1.11486	8.482832426898574
HMR_DR_ISL	T	I	177	2574	48405	441400	0.068765	0.109662	0.627057	3.373577182799889e-08
HMR_DR_ISL	T	F	12	2574	1836	441400	0.004662	0.004159	1.120811	12.229657579003423
HMR_DR_ISL	T	W	3	2574	554	441400	0.001166	0.001255	0.928614	19.0
HMR_DR_ISL	T	M	124	2574	28858	441400	0.048174	0.065378	0.73685	0.01925495408324625
HMR_DR_ISL	T	C	12	2574	1670	441400	0.004662	0.003783	1.232221	7.987415898185508
HMR_DR_ISL	T	P	287	2574	45591	441400	0.1115	0.103287	1.07951	4.419467397270815
HMR_DR_ISL	T	S	650	2574	78987	441400	0.252525	0.178947	1.411177	9.300779114204202e-14
HMR_DR_ISL	T	Y	6	2574	895	441400	0.002331	0.002028	1.149614	12.4897238125253
HMR_DR_ISL	T	D	25	2574	3456	441400	0.009713	0.00783	1.240481	6.417821141526694
HMR_DR_ISL	T	E	25	2574	5080	441400	0.009713	0.011509	0.843918	8.60539295369737
HMR_DR_ISL	T	N	86	2574	17565	441400	0.033411	0.039794	0.839603	2.337230186042567
HMR_DR_ISL	T	Q	26	2574	3350	441400	0.010101	0.007589	1.330921	2.6565711639707974
HMR_DR_ISL	T	K	60	2574	11711	441400	0.02331	0.026531	0.878579	6.716951238878791
HMR_DR_ISL	T	R	47	2574	11204	441400	0.01826	0.025383	0.719364	0.5557080485218953
HMR_DR_ISL	T	H	18	2574	2335	441400	0.006993	0.00529	1.321933	4.189022991249534
HMR_DR_ISL	T	G	39	2574	7269	441400	0.015152	0.016468	0.920055	12.5732917660343
HMR_DR_ISL	T	A	822	2574	143908	441400	0.319347	0.326026	0.979514	11.788691357217173
HMR_DR_ISL	T	V	95	2574	19497	441400	0.036908	0.044171	0.835564	1.805693173703768
HMR_DR_ISL	T	L	60	2574	9229	441400	0.02331	0.020908	1.11486	8.482832426898574
HMR_DR_ISL	T	I	177	2574	48405	441400	0.068765	0.109662	0.627057	3.373577182799889e-08
HMR_DR_ISL	T	F	12	2574	1836	441400	0.004662	0.004159	1.120811	12.229657579003423
HMR_DR_ISL	T	W	3	2574	554	441400	0.001166	0.001255	0.928614	19.0
HMR_DR_ISL	T	M	124	2574	28858	441400	0.048174	0.065378	0.73685	0.01925495408324625
HMR_DR_ISL	T	C	12	2574	1670	441400	0.004662	0.003783	1.232221	7.987415898185508
HMR_DR_ISL	T	P	287	2574	45591	441400	0.1115	0.103287	1.07951	4.419467397270815
HMR_DR_ISL	T	S	650	2574	78987	441400	0.252525	0.178947	1.411177	9.300779114204202e-14
HMR_DR_ISL	T	Y	6	2574	895	441400	0.002331	0.002028	1.149614	12.4897238125253
HMR_DR_ISL	Y	D	15	346	2798	59332	0.043353	0.047158	0.919298	17.070097552714486
HMR_DR_ISL	Y	E	6	346	597	59332	0.017341	0.010062	1.723415	3.274824385640041
HMR_DR_ISL	Y	N	8	346	2598	59332	0.023121	0.043788	0.528036	1.5482330800624842
HMR_DR_ISL	Y	Q	9	346	896	59332	0.026012	0.015101	1.722453	2.2362379198973636
HMR_DR_ISL	Y	K	5	346	433	59332	0.014451	0.007298	1.980136	2.190678588160938
HMR_DR_ISL	Y	R	9	346	1357	59332	0.026012	0.022871	1.137301	13.61050198330836
HMR_DR_ISL	Y	H	64	346	12738	59332	0.184971	0.21469	0.861572	5.772789425806946
HMR_DR_ISL	Y	G	7	346	935	59332	0.020231	0.015759	1.283806	9.711037609337735
HMR_DR_ISL	Y	A	7	346	773	59332	0.020231	0.013028	1.552857	4.389505524289404
HMR_DR_ISL	Y	V	3	346	690	59332	0.008671	0.011629	0.745564	15.255783269628289
HMR_DR_ISL	Y	L	13	346	2122	59332	0.037572	0.035765	1.050536	14.677977431535755
HMR_DR_ISL	Y	I	6	346	665	59332	0.017341	0.011208	1.547186	5.629570187336073
HMR_DR_ISL	Y	F	70	346	11145	59332	0.202312	0.187841	1.077038	11.760836097213202
HMR_DR_ISL	Y	W	7	346	616	59332	0.020231	0.010382	1.948634	1.9169814361504662
HMR_DR_ISL	Y	M	1	346	231	59332	0.00289	0.003893	0.742337	19.0
HMR_DR_ISL	Y	C	68	346	12794	59332	0.196532	0.215634	0.911413	10.00651535663306
HMR_DR_ISL	Y	P	7	346	1167	59332	0.020231	0.019669	1.028585	16.068825550342606
HMR_DR_ISL	Y	S	37	346	6071	59332	0.106936	0.102323	1.045092	16.495736859014638
HMR_DR_ISL	Y	T	4	346	706	59332	0.011561	0.011899	0.971557	19.0
HMR_DR_IND	S	D	135	7558	11183	684254	0.017862	0.016343	1.092914	6.291008960656227
HMR_DR_IND	S	E	125	7558	8229	684254	0.016539	0.012026	1.375224	0.009935900205214005
HMR_DR_IND	S	N	898	7558	89385	684254	0.118815	0.130631	0.909541	0.14999566230089548
HMR_DR_IND	S	Q	94	7558	7142	684254	0.012437	0.010438	1.191567	1.9863678412355306
HMR_DR_IND	S	K	125	7558	8934	684254	0.016539	0.013057	1.266702	0.199556055297305
HMR_DR_IND	S	R	362	7558	37976	684254	0.047896	0.0555	0.862998	0.13070146777787836
HMR_DR_IND	S	H	110	7558	10038	684254	0.014554	0.01467	0.992101	18.484274772037743
HMR_DR_IND	S	G	953	7558	93118	684254	0.126092	0.136087	0.926552	0.5397697791299306
HMR_DR_IND	S	A	970	7558	86845	684254	0.128341	0.126919	1.011201	14.40998685726386
HMR_DR_IND	S	V	144	7558	11520	684254	0.019053	0.016836	1.131672	2.9710033673067326
HMR_DR_IND	S	L	544	7558	46432	684254	0.071977	0.067858	1.060699	3.69737939541016
HMR_DR_IND	S	I	136	7558	13025	684254	0.017994	0.019035	0.945304	10.364613084697655
HMR_DR_IND	S	F	290	7558	24793	684254	0.03837	0.036234	1.05896	6.783250845053069
HMR_DR_IND	S	W	38	7558	3367	684254	0.005028	0.004921	1.021765	18.2570322029387
HMR_DR_IND	S	M	46	7558	2842	684254	0.006086	0.004153	1.46536	0.24335224372568648
HMR_DR_IND	S	C	386	7558	32558	684254	0.051072	0.047582	1.073347	3.5391781601472347
HMR_DR_IND	S	P	1169	7558	109208	684254	0.154671	0.159602	0.969104	6.236690546558754
HMR_DR_IND	S	T	918	7558	79766	684254	0.121461	0.116574	1.041922	4.748674653583019
HMR_DR_IND	S	Y	115	7558	7893	684254	0.015216	0.011535	1.319065	0.07518896448609966
HMR_DR_IND	T	D	18	1758	3463	442216	0.010239	0.007831	1.307482	5.237118195082278
HMR_DR_IND	T	E	24	1758	5081	442216	0.013652	0.01149	1.188167	8.888329854695712
HMR_DR_IND	T	N	64	1758	17587	442216	0.036405	0.03977	0.915385	10.014047156402375
HMR_DR_IND	T	Q	11	1758	3365	442216	0.006257	0.007609	0.822287	12.881244843252976
HMR_DR_IND	T	K	35	1758	11736	442216	0.019909	0.026539	0.750177	2.0299767097092776
HMR_DR_IND	T	R	36	1758	11215	442216	0.020478	0.025361	0.807456	4.413747123960567
HMR_DR_IND	T	H	12	1758	2341	442216	0.006826	0.005294	1.289423	6.182953826261116
HMR_DR_IND	T	G	34	1758	7274	442216	0.01934	0.016449	1.175767	7.6147624367084275
HMR_DR_IND	T	A	512	1758	144218	442216	0.29124	0.326126	0.89303	0.4948988035381069
HMR_DR_IND	T	V	62	1758	19530	442216	0.035267	0.044164	0.798555	1.753852664725544
HMR_DR_IND	T	L	54	1758	9235	442216	0.030717	0.020883	1.470864	0.12441268961919673
HMR_DR_IND	T	I	193	1758	48389	442216	0.109784	0.109424	1.003289	18.921444775031894
HMR_DR_IND	T	F	11	1758	1837	442216	0.006257	0.004154	1.506257	3.5751298731073256
HMR_DR_IND	T	W	8	1758	549	442216	0.004551	0.001241	6655-03-01	0.037600901759045825
HMR_DR_IND	T	M	105	1758	28877	442216	0.059727	0.065301	0.914646	7.634710862402023
HMR_DR_IND	T	C	11	1758	1671	442216	0.006257	0.003779	1.655891	2.1588195137945965
HMR_DR_IND	T	P	143	1758	45735	442216	0.081342	0.103422	0.786508	0.12237208260668361
HMR_DR_IND	T	S	423	1758	79214	442216	0.240614	0.17913	1.343241	1.10286584344696e-06
HMR_DR_IND	T	Y	2	1758	899	442216	0.001138	0.002033	0.559611	11.300755198720331
HMR_DR_IND	Y	D	16	375	2797	59303	0.042667	0.047165	0.904634	15.326237980533849
HMR_DR_IND	Y	E	9	375	594	59303	0.024	0.010016	2.396081	0.3068640990591008
HMR_DR_IND	Y	N	8	375	2598	59303	0.021333	0.043809	0.486963	0.7484256464191328
HMR_DR_IND	Y	Q	3	375	902	59303	0.008	0.01521	0.525969	7.405358281365141
HMR_DR_IND	Y	K	1	375	437	59303	0.002667	0.007369	0.361879	10.140845763372962
HMR_DR_IND	Y	R	23	375	1343	59303	0.061333	0.022646	2.708303	0.0007898624614338443
HMR_DR_IND	Y	H	66	375	12736	59303	0.176	0.214761	0.819514	2.918182854961197
HMR_DR_IND	Y	G	9	375	933	59303	0.024	0.015733	1.525479	3.962834746694395
HMR_DR_IND	Y	A	7	375	773	59303	0.018667	0.013035	1.432069	6.730838215574422
HMR_DR_IND	Y	V	9	375	684	59303	0.024	0.011534	2.080807	0.8830162723065789
HMR_DR_IND	Y	L	14	375	2121	59303	0.037333	0.035765	1.043837	14.847152871565449
HMR_DR_IND	Y	I	13	375	658	59303	0.034667	0.011096	3.124373	0.009043640798765391
HMR_DR_IND	Y	F	70	375	11145	59303	0.186667	0.187933	0.993261	18.797099966640396
HMR_DR_IND	Y	W	4	375	619	59303	0.010667	0.010438	1.021915	15.194042069236893
HMR_DR_IND	Y	M	3	375	229	59303	0.008	0.003862	2.071721	3.447307992771193
HMR_DR_IND	Y	C	62	375	12800	59303	0.165333	0.215841	0.765997	1.1357939957162468
HMR_DR_IND	Y	P	8	375	1166	59303	0.021333	0.019662	1.085018	13.4917187853464
HMR_DR_IND	Y	S	42	375	6066	59303	0.112	0.102288	1.094945	12.113948692091377
HMR_DR_IND	Y	T	8	375	702	59303	0.021333	0.011838	1.80218	1.816256442378424
HMR_OR	S	D	16	1201	6094	350028	0.013322	0.01741	0.765204	6.457595330580056
HMR_OR	S	E	14	1201	4281	350028	0.011657	0.01223	0.953109	19.0
HMR_OR	S	N	171	1201	48288	350028	0.142381	0.137955	1.032088	13.881402587389688
HMR_OR	S	Q	12	1201	4023	350028	0.009992	0.011493	0.869343	14.918254590050198
HMR_OR	S	K	24	1201	5631	350028	0.019983	0.016087	1.242183	5.703197156020137
HMR_OR	S	R	58	1201	22643	350028	0.048293	0.064689	0.746541	0.6460593886216949
HMR_OR	S	H	17	1201	5918	350028	0.014155	0.016907	0.837209	10.231108313521535
HMR_OR	S	G	104	1201	40680	350028	0.086595	0.116219	0.745096	0.08576569649919683
HMR_OR	S	A	202	1201	51295	350028	0.168193	0.146545	1.14772	1.4589682870421634
HMR_OR	S	V	23	1201	6230	350028	0.019151	0.017799	1.075969	15.424625935106253
HMR_OR	S	L	74	1201	22272	350028	0.061615	0.063629	0.96835	15.855469559847641
HMR_OR	S	I	25	1201	6767	350028	0.020816	0.019333	1.076722	15.096915287071312
HMR_OR	S	F	46	1201	14630	350028	0.038301	0.041797	0.916375	11.614218074718199
HMR_OR	S	W	6	1201	2065	350028	0.004996	0.0059	0.84682	16.157046103748446
HMR_OR	S	M	8	1201	1719	350028	0.006661	0.004911	1.356357	7.631058095371449
HMR_OR	S	C	66	1201	19590	350028	0.054954	0.055967	0.981905	17.76752168947726
HMR_OR	S	P	113	1201	35620	350028	0.094088	0.101763	0.92458	8.63319849378244
HMR_OR	S	T	195	1201	46927	350028	0.162365	0.134066	1.211077	0.280816899142714
HMR_OR	S	Y	27	1201	5355	350028	0.022481	0.015299	1.469481	1.1203723645146906
HMR_OR	T	D	5	421	2649	304677	0.011876	0.008694	1.365984	8.070737137836392
HMR_OR	T	E	6	421	3732	304677	0.014252	0.012249	1.163502	12.426037804638714
HMR_OR	T	N	13	421	13265	304677	0.030879	0.043538	0.709241	5.276389217038042
HMR_OR	T	Q	9	421	2681	304677	0.021378	0.008799	2.429424	0.2755865735956573
HMR_OR	T	K	7	421	10268	304677	0.016627	0.033701	0.493367	1.0658370674430488
HMR_OR	T	R	7	421	8769	304677	0.016627	0.028781	0.577704	3.4961857614438534
HMR_OR	T	H	2	421	1937	304677	0.004751	0.006358	0.747236	19.0
HMR_OR	T	G	10	421	4610	304677	0.023753	0.015131	1.569845	3.02089151628538
HMR_OR	T	A	95	421	88745	304677	0.225653	0.291276	0.774707	0.5289867033681979
HMR_OR	T	V	26	421	15316	304677	0.061758	0.05027	1.228529	6.907767369685934
HMR_OR	T	L	13	421	7595	304677	0.030879	0.024928	1.23872	8.22173819988371
HMR_OR	T	I	53	421	38253	304677	0.125891	0.125553	1.002693	18.173243486050506
HMR_OR	T	F	2	421	2037	304677	0.004751	0.006686	0.710553	19.0
HMR_OR	T	M	19	421	23262	304677	0.045131	0.07635	0.591104	0.5647960813114485
HMR_OR	T	C	5	421	1545	304677	0.011876	0.005071	2.342066	1.271488033910774
HMR_OR	T	P	22	421	17456	304677	0.052257	0.057293	0.912085	14.293279436131549
HMR_OR	T	S	126	421	61031	304677	0.299287	0.200314	1.494093	0.001686652103139619
HMR_OR	T	Y	1	421	985	304677	0.002375	0.003233	0.734719	19.0
HMR_OR	Y	D	9	429	2827	96328	0.020979	0.029348	0.714845	7.361137558175011
HMR_OR	Y	E	5	429	838	96328	0.011655	0.008699	1.339742	8.209884576129998
HMR_OR	Y	N	15	429	3549	96328	0.034965	0.036843	0.949031	19.0
HMR_OR	Y	Q	5	429	1426	96328	0.011655	0.014804	0.78731	15.94695572281545
HMR_OR	Y	K	4	429	833	96328	0.009324	0.008648	1.078227	15.0272218853653
HMR_OR	Y	R	8	429	2181	96328	0.018648	0.022641	0.823625	14.129626335700205
HMR_OR	Y	H	79	429	23559	96328	0.184149	0.244571	0.752949	0.4462917800977787
HMR_OR	Y	G	11	429	1282	96328	0.025641	0.013309	1.926637	1.0157772577930053
HMR_OR	Y	A	7	429	1342	96328	0.016317	0.013932	1.171226	12.8471234455844
HMR_OR	Y	V	13	429	1410	96328	0.030303	0.014637	2.070234	0.28702034777877145
HMR_OR	Y	L	26	429	4116	96328	0.060606	0.042729	1.418382	1.8148444880630468
HMR_OR	Y	I	5	429	1253	96328	0.011655	0.013008	0.896013	19.0
HMR_OR	Y	F	109	429	23375	96328	0.254079	0.24266	1.047057	13.470333350151893
HMR_OR	Y	W	10	429	1286	96328	0.02331	0.01335	1.74604	1.6917236719199527
HMR_OR	Y	M	2	429	459	96328	0.004662	0.004765	0.978391	19.0
HMR_OR	Y	C	67	429	15525	96328	0.156177	0.161168	0.969033	16.377324651481093
HMR_OR	Y	P	12	429	1511	96328	0.027972	0.015686	1.783249	0.9976546718718032
HMR_OR	Y	S	23	429	8288	96328	0.053613	0.086039	0.623122	0.6145603927700849
HMR_OR	Y	T	19	429	1268	96328	0.044289	0.013163	3.36457	0.00019836430849343368
MOUSE_DR_ALL	S	D	402	21666	7742	481323	0.018554	0.016085	1.153535	0.11614975963594831
MOUSE_DR_ALL	S	E	359	21666	5424	481323	0.01657	0.011269	1.47039	3.972463605545462e-11
MOUSE_DR_ALL	S	N	2659	21666	64339	481323	0.122727	0.133671	0.918125	0.0009166179222301815
MOUSE_DR_ALL	S	Q	263	21666	4812	481323	0.012139	0.009997	1.214194	0.04857035940730371
MOUSE_DR_ALL	S	K	337	21666	6017	481323	0.015554	0.012501	1.24425	0.002236854814299473
MOUSE_DR_ALL	S	R	1068	21666	26590	481323	0.049294	0.055244	0.8923	0.007295613698971373
MOUSE_DR_ALL	S	H	264	21666	6964	481323	0.012185	0.014468	0.842176	0.13297959545127933
MOUSE_DR_ALL	S	G	2920	21666	67213	481323	0.134773	0.139642	0.965134	1.5146057001627464
MOUSE_DR_ALL	S	A	2766	21666	61533	481323	0.127665	0.127841	0.998624	18.145424676240168
MOUSE_DR_ALL	S	V	390	21666	7779	481323	0.018001	0.016162	1.113778	0.8012663019503743
MOUSE_DR_ALL	S	L	1580	21666	32382	481323	0.072925	0.067277	1.083955	0.04993293147143887
MOUSE_DR_ALL	S	I	436	21666	8980	481323	0.020124	0.018657	1.078619	2.525070722055095
MOUSE_DR_ALL	S	F	804	21666	16969	481323	0.037109	0.035255	1.052586	3.209174268016753
MOUSE_DR_ALL	S	W	123	21666	2315	481323	0.005677	0.00481	1.180353	1.558621744434907
MOUSE_DR_ALL	S	M	103	21666	1944	481323	0.004754	0.004039	1.177061	2.2754668806483442
MOUSE_DR_ALL	S	C	1091	21666	22719	481323	0.050355	0.047201	1.066826	0.8229996224372526
MOUSE_DR_ALL	S	P	3243	21666	76076	481323	0.149682	0.158056	0.947016	0.09065210255171001
MOUSE_DR_ALL	S	T	2600	21666	56105	481323	0.120004	0.116564	1.029508	3.3076874911471528
MOUSE_DR_ALL	S	Y	258	21666	5420	481323	0.011908	0.011261	1.057495	7.62380232016961
MOUSE_DR_ALL	T	D	72	8819	2428	320977	0.008164	0.007564	1.079291	10.760645298367596
MOUSE_DR_ALL	T	E	100	8819	3656	320977	0.011339	0.01139	0.995516	18.897311955812913
MOUSE_DR_ALL	T	N	352	8819	13070	320977	0.039914	0.040719	0.980216	14.007844303639677
MOUSE_DR_ALL	T	Q	69	8819	2296	320977	0.007824	0.007153	1.093785	9.588823015651833
MOUSE_DR_ALL	T	K	173	8819	8842	320977	0.019617	0.027547	0.712115	0.0002390791900322605
MOUSE_DR_ALL	T	R	227	8819	8059	320977	0.02574	0.025108	1.025178	14.081374480300433
MOUSE_DR_ALL	T	H	47	8819	1602	320977	0.005329	0.004991	1.0678	13.577453440205671
MOUSE_DR_ALL	T	G	136	8819	5118	320977	0.015421	0.015945	0.967149	13.965520817163274
MOUSE_DR_ALL	T	A	2759	8819	105339	320977	0.312847	0.328182	0.953273	0.592755076215653
MOUSE_DR_ALL	T	V	372	8819	13986	320977	0.042182	0.043573	0.968064	10.691834720459742
MOUSE_DR_ALL	T	L	185	8819	6559	320977	0.020977	0.020434	1.02657	14.374435540307497
MOUSE_DR_ALL	T	I	857	8819	34813	320977	0.097177	0.108459	0.895971	0.048557850093908735
MOUSE_DR_ALL	T	F	41	8819	1300	320977	0.004649	0.00405	1.147876	8.234793260812106
MOUSE_DR_ALL	T	W	13	8819	377	320977	0.001474	0.001175	1.255037	8.146249085603955
MOUSE_DR_ALL	T	M	478	8819	21259	320977	0.054201	0.066232	0.818351	0.0004937639108939754
MOUSE_DR_ALL	T	C	35	8819	1106	320977	0.003969	0.003446	1.151775	8.839924684284973
MOUSE_DR_ALL	T	P	861	8819	32621	320977	0.09763	0.10163	0.96064	5.219102109927607
MOUSE_DR_ALL	T	S	2025	8819	57929	320977	0.229618	0.180477	1.272283	1.2368521235700582e-20
MOUSE_DR_ALL	T	Y	17	8819	617	320977	0.001928	0.001922	1.002809	17.141909950051218
MOUSE_DR_ALL	Y	D	20	929	2130	45194	0.021529	0.04713	0.456789	0.010286110558250067
MOUSE_DR_ALL	Y	E	17	929	425	45194	0.018299	0.009404	1.94592	0.2965248981165691
MOUSE_DR_ALL	Y	N	28	929	1992	45194	0.03014	0.044077	0.683807	1.0963770806495214
MOUSE_DR_ALL	Y	Q	21	929	650	45194	0.022605	0.014382	1.571705	0.9844520614885593
MOUSE_DR_ALL	Y	K	8	929	312	45194	0.008611	0.006904	1.247385	10.34637747639778
MOUSE_DR_ALL	Y	R	30	929	1057	45194	0.032293	0.023388	1.380738	2.0245866040772036
MOUSE_DR_ALL	Y	H	167	929	9794	45194	0.179763	0.21671	0.82951	0.5732772690382159
MOUSE_DR_ALL	Y	G	34	929	645	45194	0.036598	0.014272	2.564391	5.979690696002298e-05
MOUSE_DR_ALL	Y	A	11	929	581	45194	0.011841	0.012856	0.921047	19.0
MOUSE_DR_ALL	Y	V	12	929	549	45194	0.012917	0.012148	1.063344	14.482501596765339
MOUSE_DR_ALL	Y	L	30	929	1570	45194	0.032293	0.034739	0.92958	14.527846391639669
MOUSE_DR_ALL	Y	I	23	929	462	45194	0.024758	0.010223	2.421871	0.004594524455702154
MOUSE_DR_ALL	Y	F	169	929	8460	45194	0.181916	0.187193	0.97181	14.566806837943318
MOUSE_DR_ALL	Y	W	15	929	468	45194	0.016146	0.010355	1.559231	1.9249837515233872
MOUSE_DR_ALL	Y	M	2	929	176	45194	0.002153	0.003894	0.552818	11.241136738235424
MOUSE_DR_ALL	Y	C	196	929	9890	45194	0.21098	0.218834	0.964106	12.79781842097101
MOUSE_DR_ALL	Y	P	22	929	829	45194	0.023681	0.018343	1.291021	4.185990564974683
MOUSE_DR_ALL	Y	S	111	929	4633	45194	0.119483	0.102514	1.165536	2.7666736664062275
MOUSE_DR_ALL	Y	T	13	929	571	45194	0.013994	0.012634	1.107573	12.470321491885661
MOUSE_DR_ISL	S	D	224	11143	7920	491846	0.020102	0.016103	1.248389	0.025139480855516438
MOUSE_DR_ISL	S	E	207	11143	5576	491846	0.018577	0.011337	1.638606	7.491635930100378e-11
MOUSE_DR_ISL	S	N	1299	11143	65699	491846	0.116575	0.133576	0.872725	8.551249410030431e-05
MOUSE_DR_ISL	S	Q	136	11143	4939	491846	0.012205	0.010042	1.215421	0.5466877820185712
MOUSE_DR_ISL	S	K	176	11143	6178	491846	0.015795	0.012561	1.257453	0.06292347164779903
MOUSE_DR_ISL	S	R	527	11143	27131	491846	0.047294	0.055162	0.857377	0.01276608678994149
MOUSE_DR_ISL	S	H	133	11143	7095	491846	0.011936	0.014425	0.82742	0.6547729537391348
MOUSE_DR_ISL	S	G	1535	11143	68598	491846	0.137755	0.13947	0.987697	12.594265892927114
MOUSE_DR_ISL	S	A	1433	11143	62866	491846	0.128601	0.127816	1.006138	15.96779957932769
MOUSE_DR_ISL	S	V	184	11143	7985	491846	0.016513	0.016235	1.017115	16.168960820572295
MOUSE_DR_ISL	S	L	838	11143	33124	491846	0.075204	0.067346	1.116679	0.047160777093714995
MOUSE_DR_ISL	S	I	220	11143	9196	491846	0.019743	0.018697	1.055968	8.55163411007062
MOUSE_DR_ISL	S	F	401	11143	17372	491846	0.035987	0.03532	1.018877	13.974320631482279
MOUSE_DR_ISL	S	W	60	11143	2378	491846	0.005385	0.004835	1.113695	8.577212486230943
MOUSE_DR_ISL	S	M	48	11143	1999	491846	0.004308	0.004064	1.059877	14.199929188076004
MOUSE_DR_ISL	S	C	523	11143	23287	491846	0.046935	0.047346	0.991323	16.433727585610463
MOUSE_DR_ISL	S	P	1679	11143	77640	491846	0.150678	0.157854	0.954536	1.537052209317318
MOUSE_DR_ISL	S	T	1382	11143	57323	491846	0.124024	0.116547	1.064158	0.6141860197485253
MOUSE_DR_ISL	S	Y	138	11143	5540	491846	0.012384	0.011264	1.099503	5.588836664687615
MOUSE_DR_ISL	T	D	48	5089	2452	324707	0.009432	0.007551	1.24905	2.8447922028691193
MOUSE_DR_ISL	T	E	68	5089	3688	324707	0.013362	0.011358	1.17646	3.986360806418619
MOUSE_DR_ISL	T	N	196	5089	13226	324707	0.038514	0.040732	0.945555	8.868098988400693
MOUSE_DR_ISL	T	Q	42	5089	2323	324707	0.008253	0.007154	1.153611	7.711670380111371
MOUSE_DR_ISL	T	K	101	5089	8914	324707	0.019847	0.027452	0.722949	0.02790737754464578
MOUSE_DR_ISL	T	R	132	5089	8154	324707	0.025938	0.025112	1.03291	14.241018630010174
MOUSE_DR_ISL	T	H	26	5089	1623	324707	0.005109	0.004998	1.022149	18.842329232238725
MOUSE_DR_ISL	T	G	64	5089	5190	324707	0.012576	0.015984	0.786814	1.2426103103619621
MOUSE_DR_ISL	T	A	1614	5089	106484	324707	0.317155	0.327939	0.967116	4.772969788356289
MOUSE_DR_ISL	T	V	227	5089	14131	324707	0.044606	0.043519	1.024972	14.141682105897216
MOUSE_DR_ISL	T	L	105	5089	6639	324707	0.020633	0.020446	1.009127	18.370445480354245
MOUSE_DR_ISL	T	I	477	5089	35193	324707	0.093732	0.108384	0.864811	0.05258304640633374
MOUSE_DR_ISL	T	F	24	5089	1317	324707	0.004716	0.004056	1.162745	10.169153443659095
MOUSE_DR_ISL	T	W	9	5089	381	324707	0.001769	0.001173	1.50722	4.043389261844529
MOUSE_DR_ISL	T	M	239	5089	21498	324707	0.046964	0.066207	0.709348	4.794489772274684e-06
MOUSE_DR_ISL	T	C	25	5089	1116	324707	0.004913	0.003437	1.429338	1.7147258567423929
MOUSE_DR_ISL	T	P	499	5089	32983	324707	0.098055	0.101578	0.965316	8.917025445737918
MOUSE_DR_ISL	T	S	1184	5089	58770	324707	0.232659	0.180994	1.28545	2.382095690811533e-13
MOUSE_DR_ISL	T	Y	9	5089	625	324707	0.001769	0.001925	0.918801	19.0
MOUSE_DR_ISL	Y	D	12	452	2138	45671	0.026549	0.046813	0.567121	1.2314107653230069
MOUSE_DR_ISL	Y	E	7	452	435	45671	0.015487	0.009525	1.625964	4.103310418315312
MOUSE_DR_ISL	Y	N	15	452	2005	45671	0.033186	0.043901	0.755925	6.692613831510476
MOUSE_DR_ISL	Y	Q	11	452	660	45671	0.024336	0.014451	1.684034	2.0834637369340854
MOUSE_DR_ISL	Y	K	6	452	314	45671	0.013274	0.006875	1.93074	2.663447969094831
MOUSE_DR_ISL	Y	R	17	452	1070	45671	0.037611	0.023428	1.605341	1.1786752130527134
MOUSE_DR_ISL	Y	H	89	452	9872	45671	0.196903	0.216155	0.910934	8.674746258987115
MOUSE_DR_ISL	Y	G	21	452	658	45671	0.04646	0.014407	3.224746	0.000145089890673421
MOUSE_DR_ISL	Y	A	7	452	585	45671	0.015487	0.012809	1.20905	10.054048934745833
MOUSE_DR_ISL	Y	V	6	452	555	45671	0.013274	0.012152	1.092346	15.713578321437382
MOUSE_DR_ISL	Y	L	18	452	1582	45671	0.039823	0.034639	1.149657	9.870401217766185
MOUSE_DR_ISL	Y	I	5	452	480	45671	0.011062	0.01051	1.052521	15.490754648333226
MOUSE_DR_ISL	Y	F	71	452	8558	45671	0.15708	0.187384	0.838278	3.5659551662721483
MOUSE_DR_ISL	Y	W	10	452	473	45671	0.022124	0.010357	2.136195	0.5969474115601334
MOUSE_DR_ISL	Y	C	84	452	10002	45671	0.185841	0.219001	0.848583	3.5441192822404517
MOUSE_DR_ISL	Y	P	5	452	846	45671	0.011062	0.018524	0.597175	7.094384312199747
MOUSE_DR_ISL	Y	S	61	452	4683	45671	0.134956	0.102538	1.316157	1.0154729903978812
MOUSE_DR_ISL	Y	T	7	452	577	45671	0.015487	0.012634	1.225813	9.962210946897901
MOUSE_DR_IND	S	D	178	10523	7966	492466	0.016915	0.016176	1.045722	11.115755869075233
MOUSE_DR_IND	S	E	152	10523	5631	492466	0.014445	0.011434	1.263266	0.1022695005644053
MOUSE_DR_IND	S	N	1360	10523	65638	492466	0.129241	0.133284	0.969662	5.634490229741375
MOUSE_DR_IND	S	Q	127	10523	4948	492466	0.012069	0.010047	1.201187	0.9037312935129175
MOUSE_DR_IND	S	K	161	10523	6193	492466	0.0153	0.012575	1.216638	0.3134267877946616
MOUSE_DR_IND	S	R	541	10523	27117	492466	0.051411	0.055064	0.933668	2.4406725120264743
MOUSE_DR_IND	S	H	131	10523	7097	492466	0.012449	0.014411	0.86384	2.041448850331824
MOUSE_DR_IND	S	G	1385	10523	68748	492466	0.131616	0.139599	0.942815	0.8132159678413695
MOUSE_DR_IND	S	A	1333	10523	62966	492466	0.126675	0.127859	0.990742	14.491253065715036
MOUSE_DR_IND	S	V	206	10523	7963	492466	0.019576	0.01617	1.210674	0.1537350615232703
MOUSE_DR_IND	S	L	742	10523	33220	492466	0.070512	0.067456	1.0453	4.877824496925912
MOUSE_DR_IND	S	I	216	10523	9200	492466	0.020526	0.018681	1.098759	3.558727124079487
MOUSE_DR_IND	S	F	403	10523	17370	492466	0.038297	0.035271	1.08578	2.1821298525501542
MOUSE_DR_IND	S	W	63	10523	2375	492466	0.005987	0.004823	1.241405	1.9935378363246659
MOUSE_DR_IND	S	M	55	10523	1992	492466	0.005227	0.004045	1.292141	1.371353096178857
MOUSE_DR_IND	S	C	568	10523	23242	492466	0.053977	0.047195	1.143698	0.04219992820769753
MOUSE_DR_IND	S	P	1564	10523	77755	492466	0.148627	0.157889	0.941337	0.5345346742325577
MOUSE_DR_IND	S	T	1218	10523	57487	492466	0.115746	0.116733	0.991549	15.06977071253013
MOUSE_DR_IND	S	Y	120	10523	5558	492466	0.011404	0.011286	1.010414	18.014864884217705
MOUSE_DR_IND	T	D	24	3730	2476	326066	0.006434	0.007594	0.847339	9.064791833413672
MOUSE_DR_IND	T	E	32	3730	3724	326066	0.008579	0.011421	0.751168	2.382335073314445
MOUSE_DR_IND	T	N	156	3730	13266	326066	0.041823	0.040685	1.027972	14.606136393832283
MOUSE_DR_IND	T	Q	27	3730	2338	326066	0.007239	0.00717	1.009522	18.26071456189716
MOUSE_DR_IND	T	K	72	3730	8943	326066	0.019303	0.027427	0.703795	0.06982714183168462
MOUSE_DR_IND	T	R	95	3730	8191	326066	0.025469	0.025121	1.013873	17.79968083492603
MOUSE_DR_IND	T	H	21	3730	1628	326066	0.00563	0.004993	1.127617	10.609446497457682
MOUSE_DR_IND	T	G	72	3730	5182	326066	0.019303	0.015892	1.214596	2.258003795625558
MOUSE_DR_IND	T	A	1145	3730	106953	326066	0.306971	0.32801	0.935856	1.0062480101658533
MOUSE_DR_IND	T	V	145	3730	14213	326066	0.038874	0.043589	0.891824	3.639363688620559
MOUSE_DR_IND	T	L	80	3730	6664	326066	0.021448	0.020438	1.049426	13.568490242728107
MOUSE_DR_IND	T	I	380	3730	35290	326066	0.101877	0.10823	0.941301	5.22953115555046
MOUSE_DR_IND	T	F	17	3730	1324	326066	0.004558	0.004061	1.122426	11.467303398725655
MOUSE_DR_IND	T	W	4	3730	386	326066	0.001072	0.001184	0.905877	19.0
MOUSE_DR_IND	T	M	239	3730	21498	326066	0.064075	0.065931	0.971844	13.198534666980446
MOUSE_DR_IND	T	C	10	3730	1131	326066	0.002681	0.003469	0.772919	10.873250516696086
MOUSE_DR_IND	T	P	362	3730	33120	326066	0.097051	0.101575	0.955465	8.095259510196932
MOUSE_DR_IND	T	S	841	3730	59113	326066	0.225469	0.181292	1.243683	2.801251225295964e-07
MOUSE_DR_IND	T	Y	8	3730	626	326066	0.002145	0.00192	1.117152	13.387357902498259
MOUSE_DR_IND	Y	D	8	477	2142	45646	0.016771	0.046926	0.3574	0.07126723515920565
MOUSE_DR_IND	Y	E	10	477	432	45646	0.020964	0.009464	2.215137	0.5389106347290202
MOUSE_DR_IND	Y	N	13	477	2007	45646	0.027254	0.043969	0.619841	2.087327015550122
MOUSE_DR_IND	Y	Q	10	477	661	45646	0.020964	0.014481	1.447714	4.6610175537841965
MOUSE_DR_IND	Y	K	2	477	318	45646	0.004193	0.006967	0.601849	14.770753054908123
MOUSE_DR_IND	Y	R	13	477	1074	45646	0.027254	0.023529	1.158306	10.345781764264856
MOUSE_DR_IND	Y	H	78	477	9883	45646	0.163522	0.216514	0.755249	0.47608520350606287
MOUSE_DR_IND	Y	G	13	477	666	45646	0.027254	0.014591	1.867899	0.6546489259425543
MOUSE_DR_IND	Y	A	4	477	588	45646	0.008386	0.012882	0.650979	10.20553008277192
MOUSE_DR_IND	Y	V	6	477	555	45646	0.012579	0.012159	1.034529	15.828909743992687
MOUSE_DR_IND	Y	L	12	477	1588	45646	0.025157	0.034789	0.723128	5.938255555525616
MOUSE_DR_IND	Y	I	18	477	467	45646	0.037736	0.010231	3.688417	0.00011011534018935483
MOUSE_DR_IND	Y	F	98	477	8531	45646	0.205451	0.186895	1.099285	8.144375587954778
MOUSE_DR_IND	Y	W	5	477	478	45646	0.010482	0.010472	1.000982	19.0
MOUSE_DR_IND	Y	M	2	477	176	45646	0.004193	0.003856	1.087431	13.445300277745773
MOUSE_DR_IND	Y	C	112	477	9974	45646	0.234801	0.218508	1.074566	10.07846131731468
MOUSE_DR_IND	Y	P	17	477	834	45646	0.035639	0.018271	1.950595	0.2947940014951687
MOUSE_DR_IND	Y	S	50	477	4694	45646	0.104822	0.102835	1.019322	18.200291098427847
MOUSE_DR_IND	Y	T	6	477	578	45646	0.012579	0.012663	0.993362	19.0
MOUSE_OR	S	D	178	10523	7966	492466	0.016915	0.016176	1.045722	11.115755869075233
MOUSE_OR	S	E	152	10523	5631	492466	0.014445	0.011434	1.263266	0.1022695005644053
MOUSE_OR	S	N	1360	10523	65638	492466	0.129241	0.133284	0.969662	5.634490229741375
MOUSE_OR	S	Q	127	10523	4948	492466	0.012069	0.010047	1.201187	0.9037312935129175
MOUSE_OR	S	K	161	10523	6193	492466	0.0153	0.012575	1.216638	0.3134267877946616
MOUSE_OR	S	R	541	10523	27117	492466	0.051411	0.055064	0.933668	2.4406725120264743
MOUSE_OR	S	H	131	10523	7097	492466	0.012449	0.014411	0.86384	2.041448850331824
MOUSE_OR	S	G	1385	10523	68748	492466	0.131616	0.139599	0.942815	0.8132159678413695
MOUSE_OR	S	A	1333	10523	62966	492466	0.126675	0.127859	0.990742	14.491253065715036
MOUSE_OR	S	V	206	10523	7963	492466	0.019576	0.01617	1.210674	0.1537350615232703
MOUSE_OR	S	L	742	10523	33220	492466	0.070512	0.067456	1.0453	4.877824496925912
MOUSE_OR	S	I	216	10523	9200	492466	0.020526	0.018681	1.098759	3.558727124079487
MOUSE_OR	S	F	403	10523	17370	492466	0.038297	0.035271	1.08578	2.1821298525501542
MOUSE_OR	S	W	63	10523	2375	492466	0.005987	0.004823	1.241405	1.9935378363246659
MOUSE_OR	S	M	55	10523	1992	492466	0.005227	0.004045	1.292141	1.371353096178857
MOUSE_OR	S	C	568	10523	23242	492466	0.053977	0.047195	1.143698	0.04219992820769753
MOUSE_OR	S	P	1564	10523	77755	492466	0.148627	0.157889	0.941337	0.5345346742325577
MOUSE_OR	S	T	1218	10523	57487	492466	0.115746	0.116733	0.991549	15.06977071253013
MOUSE_OR	S	Y	120	10523	5558	492466	0.011404	0.011286	1.010414	18.014864884217705
MOUSE_OR	T	D	24	3730	2476	326066	0.006434	0.007594	0.847339	9.064791833413672
MOUSE_OR	T	E	32	3730	3724	326066	0.008579	0.011421	0.751168	2.382335073314445
MOUSE_OR	T	N	156	3730	13266	326066	0.041823	0.040685	1.027972	14.606136393832283
MOUSE_OR	T	Q	27	3730	2338	326066	0.007239	0.00717	1.009522	18.26071456189716
MOUSE_OR	T	K	72	3730	8943	326066	0.019303	0.027427	0.703795	0.06982714183168462
MOUSE_OR	T	R	95	3730	8191	326066	0.025469	0.025121	1.013873	17.79968083492603
MOUSE_OR	T	H	21	3730	1628	326066	0.00563	0.004993	1.127617	10.609446497457682
MOUSE_OR	T	G	72	3730	5182	326066	0.019303	0.015892	1.214596	2.258003795625558
MOUSE_OR	T	A	1145	3730	106953	326066	0.306971	0.32801	0.935856	1.0062480101658533
MOUSE_OR	T	V	145	3730	14213	326066	0.038874	0.043589	0.891824	3.639363688620559
MOUSE_OR	T	L	80	3730	6664	326066	0.021448	0.020438	1.049426	13.568490242728107
MOUSE_OR	T	I	380	3730	35290	326066	0.101877	0.10823	0.941301	5.22953115555046
MOUSE_OR	T	F	17	3730	1324	326066	0.004558	0.004061	1.122426	11.467303398725655
MOUSE_OR	T	W	4	3730	386	326066	0.001072	0.001184	0.905877	19.0
MOUSE_OR	T	M	239	3730	21498	326066	0.064075	0.065931	0.971844	13.198534666980446
MOUSE_OR	T	C	10	3730	1131	326066	0.002681	0.003469	0.772919	10.873250516696086
MOUSE_OR	T	P	362	3730	33120	326066	0.097051	0.101575	0.955465	8.095259510196932
MOUSE_OR	T	S	841	3730	59113	326066	0.225469	0.181292	1.243683	2.801251225295964e-07
MOUSE_OR	T	Y	8	3730	626	326066	0.002145	0.00192	1.117152	13.387357902498259
MOUSE_OR	Y	D	8	477	2142	45646	0.016771	0.046926	0.3574	0.07126723515920565
MOUSE_OR	Y	E	10	477	432	45646	0.020964	0.009464	2.215137	0.5389106347290202
MOUSE_OR	Y	N	13	477	2007	45646	0.027254	0.043969	0.619841	2.087327015550122
MOUSE_OR	Y	Q	10	477	661	45646	0.020964	0.014481	1.447714	4.6610175537841965
MOUSE_OR	Y	K	2	477	318	45646	0.004193	0.006967	0.601849	14.770753054908123
MOUSE_OR	Y	R	13	477	1074	45646	0.027254	0.023529	1.158306	10.345781764264856
MOUSE_OR	Y	H	78	477	9883	45646	0.163522	0.216514	0.755249	0.47608520350606287
MOUSE_OR	Y	G	13	477	666	45646	0.027254	0.014591	1.867899	0.6546489259425543
MOUSE_OR	Y	A	4	477	588	45646	0.008386	0.012882	0.650979	10.20553008277192
MOUSE_OR	Y	V	6	477	555	45646	0.012579	0.012159	1.034529	15.828909743992687
MOUSE_OR	Y	L	12	477	1588	45646	0.025157	0.034789	0.723128	5.938255555525616
MOUSE_OR	Y	I	18	477	467	45646	0.037736	0.010231	3.688417	0.00011011534018935483
MOUSE_OR	Y	F	98	477	8531	45646	0.205451	0.186895	1.099285	8.144375587954778
MOUSE_OR	Y	W	5	477	478	45646	0.010482	0.010472	1.000982	19.0
MOUSE_OR	Y	M	2	477	176	45646	0.004193	0.003856	1.087431	13.445300277745773
MOUSE_OR	Y	C	112	477	9974	45646	0.234801	0.218508	1.074566	10.07846131731468
MOUSE_OR	Y	P	17	477	834	45646	0.035639	0.018271	1.950595	0.2947940014951687
MOUSE_OR	Y	S	50	477	4694	45646	0.104822	0.102835	1.019322	18.200291098427847
MOUSE_OR	Y	T	6	477	578	45646	0.012579	0.012663	0.993362	19.0
HUMAN_DR	S	D	1399	84591	9919	607221	0.016538	0.016335	1.012447	12.88239487140754
HUMAN_DR	S	E	1174	84591	7180	607221	0.013879	0.011824	1.173725	8.730616266197455e-06
HUMAN_DR	S	N	11016	84591	79267	607221	0.130227	0.130541	0.997595	15.730482914336676
HUMAN_DR	S	Q	890	84591	6346	607221	0.010521	0.010451	1.006729	16.459817616125573
HUMAN_DR	S	K	1141	84591	7918	607221	0.013488	0.01304	1.03441	5.622692887765779
HUMAN_DR	S	R	4182	84591	34156	607221	0.049438	0.05625	0.8789	2.892166883128527e-13
HUMAN_DR	S	H	1111	84591	9037	607221	0.013134	0.014883	0.882495	0.0018802453602447355
HUMAN_DR	S	G	10931	84591	83140	607221	0.129222	0.136919	0.943784	1.7198339705152358e-06
HUMAN_DR	S	A	11082	84591	76733	607221	0.131007	0.126368	1.036713	0.016396866918254756
HUMAN_DR	S	V	1450	84591	10214	607221	0.017141	0.016821	1.019048	9.768008554913456
HUMAN_DR	S	L	5914	84591	41062	607221	0.069913	0.067623	1.033865	0.39885342382073924
HUMAN_DR	S	I	1533	84591	11628	607221	0.018122	0.01915	0.946367	0.8700900099919555
HUMAN_DR	S	F	2971	84591	22112	607221	0.035122	0.036415	0.964489	1.3388984772908548
HUMAN_DR	S	W	368	84591	3037	607221	0.00435	0.005001	0.869813	0.23786326857388504
HUMAN_DR	S	M	338	84591	2550	607221	0.003996	0.004199	0.951479	7.733387602511986
HUMAN_DR	S	C	4302	84591	28642	607221	0.050856	0.047169	1.078176	0.00013917287833177435
HUMAN_DR	S	P	13694	84591	96683	607221	0.161885	0.159222	1.016723	1.7644817842718683
HUMAN_DR	S	T	10148	84591	70536	607221	0.119965	0.116162	1.032743	0.07984742576565361
HUMAN_DR	S	Y	947	84591	7061	607221	0.011195	0.011628	0.962734	5.371755950660807
HUMAN_DR	T	D	244	37773	3237	406201	0.00646	0.007969	0.8106	0.033454701829150606
HUMAN_DR	T	E	369	37773	4736	406201	0.009769	0.011659	0.837865	0.023042748360789008
HUMAN_DR	T	N	1474	37773	16177	406201	0.039023	0.039825	0.979849	8.955869762086552
HUMAN_DR	T	Q	264	37773	3112	406201	0.006989	0.007661	0.912271	3.0866383490611784
HUMAN_DR	T	K	879	37773	10892	406201	0.023271	0.026814	0.867842	0.0012969210779570927
HUMAN_DR	T	R	811	37773	10440	406201	0.02147	0.025702	0.835372	2.1100705648177848e-05
HUMAN_DR	T	H	209	37773	2144	406201	0.005533	0.005278	1.048289	10.269883224486502
HUMAN_DR	T	G	535	37773	6773	406201	0.014164	0.016674	0.849439	0.006269182166853449
HUMAN_DR	T	A	12643	37773	132087	406201	0.33471	0.325176	1.029318	0.13894248806893097
HUMAN_DR	T	V	1490	37773	18102	406201	0.039446	0.044564	0.885155	0.0001803912550544213
HUMAN_DR	T	L	749	37773	8540	406201	0.019829	0.021024	0.943156	2.5284505765491874
HUMAN_DR	T	I	3941	37773	44641	406201	0.104334	0.109899	0.949362	0.05716908716573383
HUMAN_DR	T	F	181	37773	1667	406201	0.004792	0.004104	1.167623	1.0051466144179708
HUMAN_DR	T	W	50	37773	507	406201	0.001324	0.001248	1.060527	14.22661568466886
HUMAN_DR	T	M	2155	37773	26827	406201	0.057051	0.066044	0.863843	4.072975891488847e-09
HUMAN_DR	T	C	172	37773	1510	406201	0.004554	0.003717	1.224929	0.25244486400596944
HUMAN_DR	T	P	3881	37773	41997	406201	0.102745	0.10339	0.993768	13.856778163098625
HUMAN_DR	T	S	7646	37773	71991	406201	0.20242	0.17723	1.14213	1.2160322355776027e-22
HUMAN_DR	T	Y	80	37773	821	406201	0.002118	0.002021	1.047867	13.956672356077368
HUMAN_DR	Y	D	293	6991	2520	52687	0.041911	0.04783	0.876256	0.7352088418423233
HUMAN_DR	Y	E	89	6991	514	52687	0.012731	0.009756	1.304942	0.46784228013723383
HUMAN_DR	Y	N	275	6991	2331	52687	0.039336	0.044242	0.889108	1.434030713814907
HUMAN_DR	Y	Q	103	6991	802	52687	0.014733	0.015222	0.967892	15.139965296013722
HUMAN_DR	Y	K	57	6991	381	52687	0.008153	0.007231	1.127494	8.412384537403629
HUMAN_DR	Y	R	176	6991	1190	52687	0.025175	0.022586	1.114628	3.7738274730589327
HUMAN_DR	Y	H	1402	6991	11400	52687	0.200544	0.216372	0.926845	0.2842705584128764
HUMAN_DR	Y	G	133	6991	809	52687	0.019024	0.015355	1.238989	0.4985689080798046
HUMAN_DR	Y	A	94	6991	686	52687	0.013446	0.01302	1.032685	15.477591821868824
HUMAN_DR	Y	V	107	6991	586	52687	0.015305	0.011122	1.376101	0.05694670257000868
HUMAN_DR	Y	L	238	6991	1897	52687	0.034044	0.036005	0.945527	8.42118259299244
HUMAN_DR	Y	I	88	6991	583	52687	0.012588	0.011065	1.13757	5.488637814554001
HUMAN_DR	Y	F	1376	6991	9839	52687	0.196824	0.186744	1.053978	1.86167416426083
HUMAN_DR	Y	W	80	6991	543	52687	0.011443	0.010306	1.110336	7.975096194730592
HUMAN_DR	Y	M	32	6991	200	52687	0.004577	0.003796	1.205825	7.198080176452054
HUMAN_DR	Y	C	1562	6991	11300	52687	0.22343	0.214474	1.041758	3.3284640264287635
HUMAN_DR	Y	P	133	6991	1041	52687	0.019024	0.019758	0.962864	13.639903414558475
HUMAN_DR	Y	S	672	6991	5436	52687	0.096124	0.103175	0.931653	1.9490690771308252
HUMAN_DR	Y	T	81	6991	629	52687	0.011586	0.011938	0.970507	16.085625850005265
HUMAN_OR	S	D	180	13051	5930	338178	0.013792	0.017535	0.786537	0.03375945151503417
HUMAN_OR	S	E	129	13051	4166	338178	0.009884	0.012319	0.802365	0.2988152167029924
HUMAN_OR	S	N	2078	13051	46381	338178	0.159222	0.13715	1.160933	1.2468974392840258e-08
HUMAN_OR	S	Q	104	13051	3931	338178	0.007969	0.011624	0.685539	0.003156539302743206
HUMAN_OR	S	K	174	13051	5481	338178	0.013332	0.016207	0.822604	0.2443325902155863
HUMAN_OR	S	R	790	13051	21911	338178	0.060532	0.064791	0.934257	1.3488736793738463
HUMAN_OR	S	H	195	13051	5740	338178	0.014941	0.016973	0.880287	1.6771456270427016
HUMAN_OR	S	G	1321	13051	39463	338178	0.101218	0.116693	0.86739	2.51869740182628e-05
HUMAN_OR	S	A	2091	13051	49406	338178	0.160218	0.146095	1.09667	0.002465023155883372
HUMAN_OR	S	V	191	13051	6062	338178	0.014635	0.017925	0.81643	0.1276121117816458
HUMAN_OR	S	L	761	13051	21585	338178	0.05831	0.063827	0.913554	0.3424527991048823
HUMAN_OR	S	I	217	13051	6575	338178	0.016627	0.019442	0.855196	0.5041409849210311
HUMAN_OR	S	F	471	13051	14205	338178	0.036089	0.042005	0.859174	0.029542134220523996
HUMAN_OR	S	W	61	13051	2010	338178	0.004674	0.005944	0.786385	1.3931131331434157
HUMAN_OR	S	M	49	13051	1678	338178	0.003755	0.004962	0.756669	1.1875781642563494
HUMAN_OR	S	C	810	13051	18846	338178	0.062064	0.055728	1.113698	0.07218070103769089
HUMAN_OR	S	P	1233	13051	34500	338178	0.094476	0.102017	0.926074	0.22392378082345055
HUMAN_OR	S	T	1973	13051	45149	338178	0.151176	0.133507	1.13235	9.384505619917881e-06
HUMAN_OR	S	Y	223	13051	5159	338178	0.017087	0.015255	1.120059	2.0473231503029083
HUMAN_OR	T	D	97	9819	2557	295279	0.009879	0.00866	1.140792	4.278312027791644
HUMAN_OR	T	E	93	9819	3645	295279	0.009471	0.012344	0.767274	0.2557018157381012
HUMAN_OR	T	N	403	9819	12875	295279	0.041043	0.043603	0.941289	4.774489436255879
HUMAN_OR	T	Q	92	9819	2598	295279	0.00937	0.008798	1.064913	11.255937240538767
HUMAN_OR	T	K	357	9819	9918	295279	0.036358	0.033589	1.082454	2.9742210355854084
HUMAN_OR	T	R	273	9819	8503	295279	0.027803	0.028796	0.965508	11.294108258252523
HUMAN_OR	T	H	60	9819	1879	295279	0.006111	0.006363	0.960262	15.34145957730481
HUMAN_OR	T	G	146	9819	4474	295279	0.014869	0.015152	0.981346	16.28207268180532
HUMAN_OR	T	A	2837	9819	86003	295279	0.28893	0.29126	0.991999	13.657888013650966
HUMAN_OR	T	V	408	9819	14934	295279	0.041552	0.050576	0.821579	0.002538577242038463
HUMAN_OR	T	L	237	9819	7371	295279	0.024137	0.024963	0.966913	12.116030992380107
HUMAN_OR	T	I	1108	9819	37198	295279	0.112842	0.125976	0.895747	0.012387200374797517
HUMAN_OR	T	F	66	9819	1973	295279	0.006722	0.006682	1.005963	18.763614549836234
HUMAN_OR	T	W	16	9819	525	295279	0.001629	0.001778	0.916486	17.14883247287515
HUMAN_OR	T	M	685	9819	22596	295279	0.069763	0.076524	0.911642	0.4212086129554697
HUMAN_OR	T	C	48	9819	1502	295279	0.004888	0.005087	0.961029	16.013271676012042
HUMAN_OR	T	P	520	9819	16958	295279	0.052959	0.05743	0.922134	1.513218698887684
HUMAN_OR	T	S	2343	9819	58814	295279	0.238619	0.199181	1.198	2.440631635648339e-13
HUMAN_OR	T	Y	30	9819	956	295279	0.003055	0.003238	0.943689	15.665250900337554
HUMAN_OR	Y	D	152	6190	2684	90567	0.024556	0.029636	0.828591	0.5393199880225048
HUMAN_OR	Y	E	69	6190	774	90567	0.011147	0.008546	1.30433	0.787912110624061
HUMAN_OR	Y	N	213	6190	3351	90567	0.03441	0.037	0.930003	6.2618925961969865
HUMAN_OR	Y	Q	79	6190	1352	90567	0.012763	0.014928	0.854928	3.728295797891812
HUMAN_OR	Y	K	62	6190	775	90567	0.010016	0.008557	1.170494	5.013876318878255
HUMAN_OR	Y	R	147	6190	2042	90567	0.023748	0.022547	1.053273	10.977622028447504
HUMAN_OR	Y	H	1439	6190	22199	90567	0.232472	0.245111	0.948433	1.5623462255451748
HUMAN_OR	Y	G	95	6190	1198	90567	0.015347	0.013228	1.160235	3.499351601705988
HUMAN_OR	Y	A	83	6190	1266	90567	0.013409	0.013979	0.959232	14.390614800962522
HUMAN_OR	Y	V	90	6190	1333	90567	0.01454	0.014718	0.987852	18.13853892901599
HUMAN_OR	Y	L	280	6190	3862	90567	0.045234	0.042642	1.060779	6.99088686275335
HUMAN_OR	Y	I	79	6190	1179	90567	0.012763	0.013018	0.980376	17.31359559519828
HUMAN_OR	Y	F	1649	6190	21835	90567	0.266397	0.241092	1.104961	0.010193288563611796
HUMAN_OR	Y	W	73	6190	1223	90567	0.011793	0.013504	0.873325	5.482973502343115
HUMAN_OR	Y	M	34	6190	427	90567	0.005493	0.004715	1.165012	8.495008102876286
HUMAN_OR	Y	C	1002	6190	14590	90567	0.161874	0.161096	1.004828	17.197240648189453
HUMAN_OR	Y	P	86	6190	1437	90567	0.013893	0.015867	0.875631	4.86222111273835
HUMAN_OR	Y	S	483	6190	7828	90567	0.078029	0.086433	0.902767	0.7159714180428352
HUMAN_OR	Y	T	75	6190	1212	90567	0.012116	0.013382	0.905395	8.349036901113248

## Sheet: local_mutations
Dataset	Radius	Mutation			#mutations near psites	#mutations near regular ST	p_phos	p_nonphos	Q	p_value	p_bonf
HMR_DR_ALL	1	Y	>	W	18	186	0.038217	0.011124	3.43554476806904	5.351178979892703e-07	0.00016695678417265233
HMR_DR_ALL	1	Y	>	G	23	283	0.048832	0.016925	2.8851994091580506	1.3907650155187763e-06	0.0004339186848418582
HMR_DR_ALL	1	R	>	D	40	599	0.016474	0.007533	2.18691092526218	1.947132680731662e-06	0.0006075053963882785
HMR_DR_ALL	1	P	>	K	96	1098	0.021424	0.012192	1.7572178477690288	1.574097514253448e-07	4.911184244470758e-05
HMR_DR_ALL	1	E	>	D	1208	30245	0.401863	0.288829	1.3913526688802025	1.381030022923152e-21	4.3088136715202344e-19
HMR_DR_ALL	1	D	>	E	1250	24759	0.460914	0.35825	1.2865708304256802	5.91511134741447e-13	1.8455147403933147e-10
HMR_DR_ALL	1	R	>	G	302	12620	0.124382	0.15871	0.7837061306785963	8.5989007103477e-05	0.026828570216284826
HMR_DR_ALL	1	E	>	Q	256	12182	0.085163	0.116334	0.7320559767565802	2.2540233041186593e-06	0.0007032552708850217
HMR_DR_ALL	1	D	>	N	377	13765	0.139012	0.199172	0.6979495109754383	1.0565637851476896e-10	3.2964790096607916e-08
HMR_DR_ALL	1	E	>	K	356	18779	0.11843	0.179333	0.6603915620661005	1.888799694142626e-13	5.893055045724992e-11
HMR_DR_ALL	1	D	>	H	75	3324	0.027655	0.048097	0.574983886728902	2.772922772684265e-06	0.0008651519050774907
HMR_DR_ALL	3	F	>	K	17	166	0.021546	0.007211	2.98793509915407	2.0117031619133182e-05	0.006276513865169552
HMR_DR_ALL	3	K	>	C	19	232	0.007835	0.003059	2.561294540699575	0.0001002436583040212	0.031276021390854614
HMR_DR_ALL	3	K	>	F	27	332	0.011134	0.004378	2.543170397441754	3.211103492757402e-06	0.0010018642897403095
HMR_DR_ALL	3	Y	>	G	21	280	0.042596	0.017182	2.479106041205913	9.717105179972859e-05	0.03031736816151532
HMR_DR_ALL	3	C	>	G	119	3125	0.271689	0.179815	1.5109362400244697	9.990672317686907e-05	0.03117089763118315
HMR_DR_ALL	3	E	>	D	1854	32724	0.420694	0.306055	1.3745699302412964	2.841308931060249e-29	8.864883864907976e-27
HMR_DR_ALL	3	D	>	E	1523	26416	0.502806	0.36696	1.3701929365598429	1.2169057863765048e-22	3.796746053494695e-20
HMR_DR_ALL	3	G	>	A	623	16782	0.248207	0.200155	1.2400739426944118	2.502918846442016e-06	0.000780910680089909
HMR_DR_ALL	3	P	>	A	839	22151	0.299002	0.242246	1.2342907622829686	1.5786412521991143e-07	4.9253607068612364e-05
HMR_DR_ALL	3	Q	>	H	427	13107	0.19944	0.161709	1.233326530990854	0.00010712134162874228	0.03342185858816759
HMR_DR_ALL	3	K	>	R	1085	29241	0.447423	0.385607	1.1603082931585786	6.757973631977125e-05	0.02108487773176863
HMR_DR_ALL	3	E	>	G	585	17419	0.132743	0.162913	0.8148091312541049	5.049487581537095e-06	0.0015754401254395737
HMR_DR_ALL	3	E	>	Q	405	12133	0.091899	0.113475	0.8098612029081295	6.980497536360603e-05	0.021779152313445082
HMR_DR_ALL	3	D	>	N	458	13793	0.151205	0.191607	0.7891413152964141	3.639809619012094e-06	0.0011356206011317734
HMR_DR_ALL	3	K	>	N	202	8532	0.083299	0.112513	0.7403500039995378	5.386258922594967e-05	0.016805127838496296
HMR_DR_ALL	3	D	>	G	397	13006	0.131066	0.180674	0.725428119153835	3.2172028491457082e-09	1.003767288933461e-06
HMR_DR_ALL	3	K	>	E	310	13447	0.127835	0.177329	0.7208916759244117	8.440163639830274e-08	2.6333310556270455e-05
HMR_DR_ALL	3	D	>	A	162	5385	0.053483	0.074806	0.7149560195706227	4.472661368777286e-05	0.013954703470585132
HMR_DR_ALL	3	Q	>	K	135	7578	0.063055	0.093494	0.6744283055597151	1.1403258941514878e-05	0.003557816789752642
HMR_DR_ALL	3	D	>	H	96	3451	0.031694	0.04794	0.6611180642469754	8.836317579345234e-05	0.02756931084755713
HMR_DR_ALL	3	R	>	W	90	3679	0.030426	0.046569	0.653353088964762	9.08634479416572e-05	0.028349395757797047
HMR_DR_ALL	3	E	>	K	500	18578	0.113456	0.173753	0.6529728983096695	3.531865136601181e-19	1.1019419226195685e-16
HMR_DR_ALL	5	Q	>	A	83	1760	0.03754	0.022772	1.6485157210609518	1.3975326756939285e-05	0.0043603019481650565
HMR_DR_ALL	5	E	>	D	1653	32267	0.430805	0.30469	1.413912501230759	8.00922779784457e-31	2.498879072927506e-28
HMR_DR_ALL	5	D	>	E	1475	25944	0.496633	0.361252	1.374755018657336	1.633268927389026e-22	5.095799053453761e-20
HMR_DR_ALL	5	G	>	A	698	16854	0.256618	0.202948	1.2644519778465422	6.230615719143804e-08	1.943952104372867e-05
HMR_DR_ALL	5	R	>	H	405	8201	0.128286	0.104142	1.2318372990724205	0.00012517201534119452	0.03905366878645269
HMR_DR_ALL	5	K	>	R	1191	29609	0.469452	0.391291	1.199751591526511	3.842241567496163e-07	0.00011987793690588029
HMR_DR_ALL	5	G	>	R	435	16268	0.159926	0.195891	0.8164029996273438	0.00011475998300750129	0.035805114698340405
HMR_DR_ALL	5	E	>	Q	336	11869	0.087568	0.112076	0.7813269567079482	2.04321144482246e-05	0.0063748197078460755
HMR_DR_ALL	5	E	>	A	277	9820	0.072192	0.092728	0.778535070313174	7.854935331209461e-05	0.024507398233373518
HMR_DR_ALL	5	D	>	G	412	13180	0.138721	0.183522	0.7558821285731412	1.6849128838435802e-07	5.25692819759197e-05
HMR_DR_ALL	5	K	>	N	212	8375	0.083563	0.110678	0.7550100290934061	0.00011304321735392313	0.03526948381442402
HMR_DR_ALL	5	K	>	E	314	13131	0.123768	0.17353	0.7132369042816804	2.4273195224094224e-08	7.573236909917398e-06
HMR_DR_ALL	5	A	>	D	134	4981	0.038057	0.053659	0.7092379656721147	0.00012747057329061382	0.03977081886667151
HMR_DR_ALL	5	D	>	N	391	13986	0.13165	0.194745	0.6760122211096562	6.345520382236874e-13	1.9798023592579048e-10
HMR_DR_ALL	5	H	>	Y	122	6214	0.08733	0.12945	0.6746234067207416	3.914952835579917e-05	0.01221465284700934
HMR_DR_ALL	5	E	>	K	426	18098	0.111024	0.170895	0.6496620732028439	5.159119578618182e-17	1.609645308528873e-14
HMR_ISL	3	Y	>	G	16	285	0.064777	0.017229	3.7597655116373554	2.832024420665938e-07	8.835916192477727e-05
HMR_ISL	3	K	>	P	43	1601	0.039341	0.020748	1.896134567187199	5.6717204004864053e-05	0.017695767649517583
HMR_ISL	3	Q	>	A	42	1865	0.042467	0.022687	1.8718649446819764	9.83354203293198e-05	0.03068065114274778
HMR_ISL	3	G	>	C	61	2474	0.050707	0.029054	1.7452674330556894	3.157075560690386e-05	0.009850075749354004
HMR_ISL	3	E	>	D	1064	33514	0.474576	0.307223	1.5447280965292312	4.918678154452333e-31	1.534627584189128e-28
HMR_ISL	3	D	>	E	865	27074	0.53198	0.368911	1.4420280230191023	8.072005657986067e-18	2.518465765291653e-15
HMR_ISL	3	G	>	A	310	17095	0.257689	0.200759	1.283573837287494	0.00011286586035173451	0.03521414842974117
HMR_ISL	3	D	>	N	231	14020	0.142066	0.191037	0.7436569879133361	3.1926130820672585e-05	0.009960952816049846
HMR_ISL	3	E	>	Q	188	12350	0.083854	0.113212	0.740681199872805	9.477732798121236e-05	0.029570526330138257
HMR_ISL	3	E	>	G	252	17752	0.1124	0.162732	0.6907061917754345	3.1932534396063225e-08	9.962950731571725e-06
HMR_ISL	3	K	>	E	132	13625	0.120769	0.176574	0.6839568679420526	4.394907128251495e-05	0.013712110240144664
HMR_ISL	3	D	>	G	198	13205	0.121771	0.179932	0.6767612209056755	2.665589711888105e-07	8.316639901090888e-05
HMR_ISL	3	E	>	K	231	18847	0.103033	0.17277	0.5963593216414886	7.160708285700089e-14	2.2341409851384276e-11
HMR_IND	3	F	>	K	16	167	0.045326	0.007119	6.366905464250596	2.01539057566653e-14	6.2880185960795735e-12
HMR_IND	3	M	>	W	9	107	0.017928	0.003232	5.547029702970296	7.138620475181881e-05	0.022272495882567467
HMR_IND	3	E	>	F	22	451	0.010162	0.004131	2.4599370612442506	4.601595373061141e-05	0.014356977563950761
HMR_IND	3	R	>	D	25	601	0.016812	0.007468	2.2512051419389394	9.537591753397098e-05	0.029757286270598943
HMR_IND	3	D	>	E	658	27281	0.468995	0.370605	1.2654848153694633	8.93007415315171e-07	0.00027861831357833334
HMR_IND	3	P	>	A	460	22530	0.30323	0.242966	1.2480347044442432	4.089460770674189e-05	0.012759117604503468
HMR_IND	3	E	>	D	790	33788	0.364896	0.309516	1.1789245144031326	9.669602490559669e-05	0.03016915977054617
HMR_IND	3	E	>	K	269	18809	0.124249	0.1723	0.7211201392919326	5.358313154034349e-07	0.00016717937040587168
HMR_IND	3	Q	>	K	64	7649	0.055556	0.093233	0.5958834318320767	6.157093837754019e-05	0.01921013277379254

## Sheet: phosphosite_conservation
Dataset	STY aminoacid	mut_num	site_num	mut_freq	mut_num_p	site_num_p	mut_freq_p	mut_freq_p/mut_freq	pvalue
D_MOUSE	S	481323	430221	1.1187808126521022	21666	49928	0.4339448806281045	0.38787300936939173	0.0
D_MOUSE	T	320977	214208	1.4984360994920825	8819	12392	0.7116688185926404	0.4749410527641928	0.0
D_MOUSE	Y	45194	56177	0.8044929419513324	929	3628	0.25606394707828006	0.31829234754650043	1.1867724174159977e-227
D_MOUSE_ISL	S	493122	454333	1.085375704604332	9867	25816	0.3822048342113418	0.35214058375359764	0.0
D_MOUSE_ISL	T	325285	219585	1.4813625703030717	4511	7015	0.6430506058446187	0.43409400151986904	0.0
D_MOUSE_ISL	Y	45713	58104	0.7867444582128597	410	1701	0.24103468547912993	0.3063697277597044	1.1964778707385333e-112
D_MOUSE_IND	S	491190	456037	1.0770836576856702	11799	24112	0.4893414067684141	0.4543207050600527	0.0
D_MOUSE_IND	T	325488	221223	1.4713117532987077	4308	5377	0.8011902547889157	0.5445414630805692	3.5630750326834044e-196
D_MOUSE_IND	Y	45604	57878	0.7879332388817858	519	1927	0.269330565646082	0.34181901759634975	3.415513605850388e-112
